# Supplementary material for: FoxA1 and FoxA2 drive gastric differentiation and suppress squamous identity in NKX2-1-negative lung cancer
Source: eLife. 2018 Nov 26;7:e38579. doi: 10.7554/eLife.38579 (PMC6303105; doi:10.7554/eLife.38579)
Supplement: Supplementary file 1. — In cells that failed quality control, cluster is not assigned and failed QC metric(s) are highlighted. [file elife-38579-supp1.xlsx]

## Sheet: Cell QC Metrics
Sample_name	Cluster	Genotype	Aligned_reads	Measureable_genes	Pct_mrna	Pct_mitchondria
11913X10	1	K	1.71764e+06	2243	0.542924	0.0953541
11913X13	1	K	2329909	5102	0.720624	0.119572
11913X14	1	K	2.00678e+06	3924	0.572554	0.0433801
11913X15	1	K	1.55766e+06	5238	0.481447	0.115934
11913X16	1	K	884977	2494	0.494696	0.0549891
11913X17	1	K	851482	2418	0.492796	0.0492113
11913X18	1	K	1.30678e+06	4220	0.659472	0.0200912
11913X2	1	K	1.29243e+06	4365	0.226503	0.123756
11913X20	1	K	2.39301e+06	3250	0.583452	0.178012
11913X24	1	K	2.17255e+06	4100	0.446721	0.0389558
11913X25	1	K	1.01691e+06	1593	0.540002	0.0496174
11913X26	1	K	813918	2653	0.707765	0.118816
11913X27	1	K	1548016	4075	0.538819	0.146849
11913X28	1	K	720848	2577	0.343004	0.198683
11913X29	1	K	976089	4917	0.409314	0.040998
11913X3	1	K	3.4436e+06	3463	0.648668	0.138262
11913X30	1	K	674818	1540	0.519271	0.136484
11913X31	1	K	1.32044e+06	1901	0.569701	0.0939732
11913X32	1	K	2.05577e+06	3879	0.570762	0.0785388
11913X33	1	K	570312	2300	0.588245	0.0184595
11913X35	1	K	2.10224e+06	3332	0.753948	0.0375837
11913X39	1	K	1.58612e+06	5536	0.449198	0.0432073
11913X42	1	K	2.63666e+06	6134	0.694729	0.0652029
11913X43	1	K	615291	2862	0.210696	0.0828199
11913X46	1	K	854883	1435	0.401651	0.197012
11913X47	1	K	2.32664e+06	3312	0.671594	0.0515721
11913X5	1	K	1.93728e+06	3178	0.743742	0.0526877
11913X57	1	K	2.11432e+06	5150	0.561284	0.0355246
11913X59	1	K	2.5635e+06	3396	0.549956	0.0155822
11913X6	1	K	1236326	1713	0.848387	0.055997
11913X60	1	K	2.60553e+06	3858	0.796593	0.133602
11913X7	1	K	869281	1318	0.763048	0.193755
11978X25	1	KN	2.60651e+06	4940	0.667457	0.0219821
11978X26	1	KN	3.59092e+06	4292	0.620213	0.00639108
11978X31	1	KN	3.11152e+06	5166	0.795677	0.000715304
11978X36	1	KN	3.51724e+06	5138	0.733534	5.74e-05
11978X52	1	KN	2638850	6173	0.799452	0.0101915
12072X1	1	KNF1F2	1.03675e+06	3687	0.492137	0.0526422
12072X10	1	KNF1F2	3.22292e+06	3305	0.679353	0.16319
12072X12	1	KNF1F2	1.79751e+06	5996	0.708101	0.104186
12072X14	1	KNF1F2	2.26591e+06	6420	0.643146	0.0550609
12072X15	1	KNF1F2	3.05251e+06	5021	0.676335	0.0870773
12072X16	1	KNF1F2	1.39861e+06	5445	0.210429	0.10984
12072X17	1	KNF1F2	4.37713e+06	6590	0.763427	0.0440096
12072X2	1	KNF1F2	1.06746e+06	3633	0.626998	0.141233
12072X20	1	KNF1F2	2.91799e+06	4995	0.810569	0.0244304
12072X25	1	KNF1F2	886778	3605	0.232225	0.120576
12072X26	1	KNF1F2	1.72003e+06	3523	0.722485	0.199109
12072X32	1	KNF1F2	1.34427e+06	2073	0.666138	0.048809
12072X36	1	KNF1F2	4.329e+06	5306	0.713127	0.0533074
12072X37	1	KNF1F2	2.41225e+06	4061	0.813915	0.00596654
12072X38	1	KNF1F2	4.42329e+06	6219	0.833138	0.0410499
12072X40	1	KNF1F2	3.64046e+06	4703	0.767833	0.0171151
12072X41	1	KNF1F2	5.23703e+06	4820	0.744042	0.0947425
12072X50	1	KNF1F2	1.93243e+06	4909	0.503619	0.0163261
12072X51	1	KNF1F2	1.44778e+06	3459	0.533338	0.0692415
12072X53	1	KNF1F2	5.8663e+06	5822	0.684973	0.0995659
12072X55	1	KNF1F2	2.41898e+06	3782	0.762057	0.148496
12072X6	1	KNF1F2	3.84272e+06	6741	0.793743	0.0692089
12251X21	1	KNF1F2	2.9188e+06	4036	0.698906	0.0841251
12251X34	1	KNF1F2	1.8721e+06	4053	0.715374	0.163046
12251X46	1	KNF1F2	2.00578e+06	2454	0.513267	0.0783707
11978X1	2	KN	4.37352e+06	6016	0.726557	0.0366774
11978X11	2	KN	2.49611e+06	4423	0.773763	0.0289458
11978X12	2	KN	866179	4896	0.630464	0.0687527
11978X14	2	KN	1.75932e+06	5383	0.574589	0.111528
11978X16	2	KN	4.38366e+06	6467	0.632933	0.100463
11978X17	2	KN	2.81331e+06	5698	0.654324	0.025834
11978X19	2	KN	3.23779e+06	5220	0.726353	0.0406061
11978X2	2	KN	1.2445e+06	4860	0.634664	0.137567
11978X27	2	KN	4.6147e+06	6390	0.779875	0.0308975
11978X28	2	KN	4.71713e+06	6227	0.706974	0.0295531
11978X29	2	KN	4.51448e+06	6307	0.703585	0.00794182
11978X3	2	KN	3.94607e+06	7825	0.739971	0.0486744
11978X32	2	KN	5.11301e+06	5677	0.655643	0.12753
11978X34	2	KN	5.85498e+06	6798	0.746742	0.0115391
11978X35	2	KN	3.74923e+06	5171	0.687908	0.0806421
11978X37	2	KN	989238	4962	0.524645	0.190592
11978X38	2	KN	1.86043e+06	4943	0.752031	0.0376553
11978X4	2	KN	6.03432e+06	7495	0.779369	0.0552828
11978X41	2	KN	6.32861e+06	6633	0.685183	0.0108145
11978X44	2	KN	760433	5171	0.661698	0.00678613
11978X45	2	KN	3.79494e+06	6437	0.765261	0.0776509
11978X46	2	KN	3.55318e+06	7251	0.543965	0.0507873
11978X48	2	KN	916684	6821	0.306607	0.102142
11978X49	2	KN	2.55752e+06	5692	0.753684	0.0231814
11978X5	2	KN	5.73713e+06	6217	0.790207	0.0389901
11978X51	2	KN	2.31895e+06	5591	0.65326	0.0328514
11978X6	2	KN	2.0666e+06	6134	0.349016	0.133587
11978X7	2	KN	4.72768e+06	5916	0.732164	0.120427
11978X8	2	KN	5.18386e+06	5214	0.811898	0.0199175
11978X9	2	KN	4.94732e+06	4900	0.55932	0.0318636
12251X4	2	KNF1F2	2.85272e+06	4973	0.435912	0.0031375
12072X18	3	KNF1F2	4.39833e+06	6217	0.698738	0.0335459
12072X19	3	KNF1F2	4.44574e+06	6939	0.78714	0.0664071
12072X21	3	KNF1F2	3.75536e+06	6853	0.706313	0.0137431
12072X23	3	KNF1F2	2.09612e+06	4812	0.83246	0.0148227
12072X27	3	KNF1F2	5.80165e+06	4932	0.889033	0.0553872
12072X3	3	KNF1F2	2585215	6635	0.681185	0.0306356
12072X4	3	KNF1F2	3.36726e+06	7857	0.677067	0.0125283
12072X44	3	KNF1F2	5.32848e+06	5535	0.801577	0.0622004
12072X49	3	KNF1F2	3.47856e+06	5962	0.692523	0.0593016
12072X54	3	KNF1F2	8.64348e+06	6619	0.717154	0.135696
12072X57	3	KNF1F2	5.61765e+06	7176	0.793809	0.0711669
12251X13	3	KNF1F2	1.79441e+06	5188	0.566224	0.0252579
12251X14	3	KNF1F2	1.91974e+06	5672	0.66932	0.0238558
12251X16	3	KNF1F2	2.86275e+06	6122	0.632675	0.0434779
12251X19	3	KNF1F2	1.87607e+06	5987	0.695601	0.0272676
12251X20	3	KNF1F2	2890693	4290	0.787679	0.0854877
12251X23	3	KNF1F2	2.32107e+06	5060	0.72714	0.0851549
12251X25	3	KNF1F2	3823690	4605	0.666335	0.0575798
12251X26	3	KNF1F2	2969718	7155	0.571592	0.0802175
12251X27	3	KNF1F2	2.70598e+06	5900	0.658278	0.0474626
12251X28	3	KNF1F2	2.43829e+06	5556	0.79684	0.0891578
12251X3	3	KNF1F2	3.0045e+06	5353	0.530417	0.0322415
12251X31	3	KNF1F2	3.70253e+06	5231	0.780689	0.0156946
12251X33	3	KNF1F2	2.27411e+06	4320	0.557819	0.0344414
12251X35	3	KNF1F2	3.44099e+06	4317	0.599356	0.0162485
12251X36	3	KNF1F2	4.04163e+06	4800	0.643228	0.0391626
12251X38	3	KNF1F2	1.19758e+06	5549	0.56641	0.0114361
12251X40	3	KNF1F2	3.80744e+06	5470	0.718593	0.0530388
12251X41	3	KNF1F2	3.36229e+06	5118	0.748925	0.030061
12251X43	3	KNF1F2	1.20369e+06	4147	0.631087	0.062201
12251X44	3	KNF1F2	3490516	4524	0.596814	0.105558
12251X45	3	KNF1F2	3.8129e+06	5213	0.620824	0.0773259
12251X47	3	KNF1F2	3.80202e+06	4598	0.581122	0.0566808
12251X48	3	KNF1F2	3.1466e+06	4301	0.669928	0.0775973
12251X49	3	KNF1F2	1.42444e+06	3626	0.61509	0.03162
12251X5	3	KNF1F2	3.60493e+06	7142	0.65006	0.0548959
12251X50	3	KNF1F2	1.64461e+06	4956	0.48296	0.0363167
12251X51	3	KNF1F2	1.63383e+06	4388	0.442991	0.0283885
12251X52	3	KNF1F2	4.5787e+06	5310	0.732161	0.091251
12251X53	3	KNF1F2	2.0811e+06	3869	0.423042	0.0414355
12251X8	3	KNF1F2	3.25052e+06	5909	0.642224	0.0266517
11913X1			1.09059e+06	4006	0.177507	0.309687
11913X11			749322	1581	0.569017	0.276717
11913X12			402389	1048	0.839538	0.339088
11913X19			535277	3244	0.509655	0.415477
11913X21			327036	1510	0.747197	0.522011
11913X22			774132	1179	0.807902	0.714873
11913X23			1.33166e+06	2017	0.780187	0.725872
11913X34			109973	554	0.314982	0.00022842
11913X36			354869	1104	0.589559	0.468403
11913X37			512019	1340	0.693236	0.604978
11913X38			996000	1864	0.633335	0.597593
11913X4			297427	1728	0.299254	0.054769
11913X40			358535	2276	0.26613	0.236913
11913X41			406640	2541	0.718266	0.152565
11913X44			2.1818e+06	1960	0.85409	0.256777
11913X45			453866	2754	0.6643	0.0284759
11913X48			667228	2528	0.569568	0.217829
11913X49			391	222	0.68366	0.0331458
11913X50			218	160	0.649202	0.087156
11913X51			231	179	0.712704	0.0538961
11913X52			161	123	0.671067	0.00931677
11913X53			204	157	0.641607	0.0245098
11913X54			209	160	0.732517	0.0287081
11913X55			280	186	0.661251	0.0505357
11913X56			210	153	0.703927	0.056619
11913X58			43435	378	0.505873	0.0571099
11913X8			581165	1814	0.706898	0.56175
11913X9			675382	940	0.841305	0.608067
11978X10			456517	3313	0.472618	0.328438
11978X13			1.69676e+06	4240	0.69148	0.418621
11978X15			1.15469e+06	5655	0.377195	0.274286
11978X18			1.8202e+06	3701	0.344844	0.521464
11978X20			860689	2854	0.623075	0.627204
11978X21			401886	2678	0.472182	0.00555349
11978X22			1.83476e+06	5227	0.289335	0.487223
11978X23			993889	5641	0.296752	0.242222
11978X24			362863	2510	0.509323	0.610826
11978X30			1.11166e+06	5781	0.159595	0.0581879
11978X33			345110	3010	0.584918	0.000553476
11978X39			836033	4770	0.314246	0.31279
11978X40			2.01288e+06	3376	0.546369	0.649909
11978X42			809261	4556	0.19903	0.123414
11978X43			4054.01	1681	0.670935	0.0722223
11978X47			657826	2704	0.492627	0.564667
11978X50			699120	1731	0.364822	0.693849
12072X11			845012	1176	0.536802	0.312025
12072X13			991026	2841	0.785225	0.430435
12072X22			280007	3263	0.502056	0.14311
12072X24			1162.98	646	0.762861	0.064842
12072X28			1061.99	367	0.390694	0.0395201
12072X29			89466	717	0.789497	0.689715
12072X30			1078.02	623	0.25786	0.0913898
12072X31			1.57306e+06	2350	0.904652	0.300885
12072X33			1.06092e+06	1178	0.668068	0.571192
12072X34			352154	3315	0.498809	0.132137
12072X35			2.30846e+06	1086	0.653844	0.791396
12072X39			695676	2117	0.281968	0.528194
12072X42			442810	2261	0.2384	0.251098
12072X43			861400	2439	0.321124	0.353853
12072X45			2.69636e+06	913	0.829408	0.643689
12072X46			2.83012e+06	2239	0.626824	0.547072
12072X47			1.51949e+06	1832	0.665246	0.389581
12072X48			2.64779e+06	2143	0.703691	0.547696
12072X5			1.05008e+06	4235	0.203911	0.244594
12072X52			466.99	302	0.716325	0.0157605
12072X56			4.59718e+06	1004	0.820236	0.648648
12072X58			450965	229	0.886427	0.584485
12072X59			1075	476	0.277175	0.103963
12072X60			17479	382	0.835891	0.69242
12072X61			56524	1484	0.854057	0.632414
12072X7			1.1761e+06	3494	0.261304	0.328153
12072X8			2.539e+06	2357	0.817805	0.51984
12072X9			2.84595e+06	1417	0.822594	0.591502
12251X1			98919.9	2155	0.068903	0.00223514
12251X10			2217079	3935	0.489094	0.290753
12251X11			1.23292e+06	1931	0.733495	0.640532
12251X12			53963	1726	0.142009	0.269565
12251X15			170736	2319	0.07276	0.120346
12251X17			1.35287e+06	3035	0.424339	0.273706
12251X18			238755	2709	0.08763	0.130355
12251X2			292642	3863	0.079144	0.115351
12251X22			84110	1371	0.761617	0.857355
12251X24			50896	1727	0.411185	0.56304
12251X29			464916	4699	0.08029	0.181271
12251X30			537689	3651	0.09955	0.112128
12251X32			778515	4405	0.123966	0.238084
12251X37			445851	3769	0.103238	0.0884673
12251X39			364085	4097	0.073386	0.0552141
12251X42			140735	1488	0.246441	0.25523
12251X54			649928	850	0.397169	0.725061
12251X55			740853	3885	0.100892	0.0619935
12251X56			2.82836e+06	3565	0.80443	0.397809
12251X57			655004	4141	0.104958	0.0435694
12251X58			479814	1499	0.118307	0.140078
12251X59			753085	2604	0.287678	0.516708
12251X6			67793	1422	0.047124	0.0033679
12251X60			379625	3214	0.241485	0.252611
12251X61			1209	388	0.083029	0.0331679
12251X62			890823	2320	0.549359	0.279958
12251X7			366961	3887	0.0841	0.00675688
12251X9			3108.97	1350	0.467997	0.0590163
