# Supplementary material for: FoxA1 and FoxA2 drive gastric differentiation and suppress squamous identity in NKX2-1-negative lung cancer
Source: eLife. 2018 Nov 26;7:e38579. doi: 10.7554/eLife.38579 (PMC6303105; doi:10.7554/eLife.38579)
Supplement: Supplementary file 3. — Genes differentially expressed between each cluster (pairwise comparisons, SCDE). [file elife-38579-supp3.xlsx]

## Sheet: SC3
EnsemblGeneID	GeneName	GeneBiotype	sc3_3_markers_clusts	sc3_3_markers_padj	sc3_3_markers_auroc	sc3_3_de_padj
ENSMUSG00000056370	Sftpb	protein_coding	1	7.27689e-13	0.909274	3.76683e-12
ENSMUSG00000022097	Sftpc	protein_coding	1	4.5238e-09	0.863575	3.3096e-08
ENSMUSG00000002944	Cd36	protein_coding	1	4.65099e-09	0.857751	4.22404e-10
ENSMUSG00000018593	Sparc	protein_coding	1	1.61881e-08	0.831877	5.92577e-08
ENSMUSG00000021789	Sftpa1	protein_coding	1	2.58678e-08	0.851366	1.5745e-07
ENSMUSG00000029375	Cxcl15	protein_coding	1	1.21166e-07	0.839046	2.52051e-07
ENSMUSG00000069516	Lyz2	protein_coding	1	2.27642e-07	0.835349	8.54805e-07
ENSMUSG00000029188	Slc34a2	protein_coding	1	6.07637e-07	0.826277	4.88266e-06
ENSMUSG00000015452	Ager	protein_coding	1	6.34139e-07	0.809812	4.74475e-07
ENSMUSG00000030218	Mgp	protein_coding	1	1.03305e-06	0.745408	8.0454e-06
ENSMUSG00000037071	Scd1	protein_coding	1	1.17264e-06	0.823141	4.8708e-06
ENSMUSG00000022018	Rgcc	protein_coding	1	1.65384e-06	0.783266	7.24472e-06
ENSMUSG00000039115	Itga9	protein_coding	1	4.20821e-06	0.753808	2.18921e-05
ENSMUSG00000020057	Dram1	protein_coding	1	1.34151e-05	0.785618	8.42675e-05
ENSMUSG00000031659	Adcy7	protein_coding	1	1.45143e-05	0.757168	0.000100563
ENSMUSG00000037940	Inpp4b	protein_coding	1	1.7651e-05	0.725918	0.000120191
ENSMUSG00000022964	Tmem50b	protein_coding	1	4.06336e-05	0.754816	0.000192576
ENSMUSG00000036594	H2-Aa	protein_coding	1	0.000129333	0.784722	3.26652e-05
ENSMUSG00000021608	Lpcat1	protein_coding	1	0.000168818	0.753696	0.00102369
ENSMUSG00000021242	Npc2	protein_coding	1	0.000181612	0.782482	0.000424362
ENSMUSG00000032640	Chsy1	protein_coding	1	0.000214595	0.736335	0.00145089
ENSMUSG00000021728	Emb	protein_coding	1	0.000245187	0.745744	9.62273e-05
ENSMUSG00000002204	Napsa	protein_coding	1	0.000291713	0.765569	0.00110422
ENSMUSG00000090509	Sfta2	protein_coding	1	0.000369086	0.747536	0.00158752
ENSMUSG00000022661	Cd200	protein_coding	1	0.000404318	0.734767	0.00221
ENSMUSG00000028024	Enpep	protein_coding	1	0.000522502	0.701837	0.00318961
ENSMUSG00000001496	Nkx2-1	protein_coding	1	0.000551709	0.720654	0.00273911
ENSMUSG00000054986	Sec14l3	protein_coding	1	0.000809769	0.701277	0.00386003
ENSMUSG00000069515	Lyz1	protein_coding	1	0.000820392	0.726254	0.00386632
ENSMUSG00000025150	Cbr2	protein_coding	1	0.000968001	0.738575	0.00142715
ENSMUSG00000065954	Tacc1	protein_coding	1	0.00101192	0.749888	0.000757997
ENSMUSG00000026600	Soat1	protein_coding	1	0.0010315	0.760753	0.000484834
ENSMUSG00000079659	Tmem243	protein_coding	1	0.00240509	0.74776	0.0102885
ENSMUSG00000055653	Gpc3	protein_coding	1	0.00301703	0.704301	0.0147479
ENSMUSG00000020077	Srgn	protein_coding	1	0.0035247	0.688732	0.0201842
ENSMUSG00000029309	Sparcl1	protein_coding	1	0.0048722	0.674171	0.0299726
ENSMUSG00000041247	Lamp3	protein_coding	1	0.0053072	0.741039	0.0199368
ENSMUSG00000026395	Ptprc	protein_coding	1	0.00562365	0.678315	0.0267901
ENSMUSG00000103034	Gm8797	protein_coding	1	0.00601128	0.750224	8.12639e-05
ENSMUSG00000040147	Maob	protein_coding	1	0.00619785	0.691084	0.0243623
ENSMUSG00000024610	Cd74	protein_coding	1	0.00628181	0.749776	5.85304e-05
ENSMUSG00000033420	Antxr1	protein_coding	1	0.0100267	0.676635	0.0598332
ENSMUSG00000064357	mt-Atp6	protein_coding	1	0.0138269	0.741935	0.0107226
ENSMUSG00000031375	Bgn	protein_coding	1	0.0141741	0.704637	0.0121864
ENSMUSG00000020717	Pecam1	protein_coding	1	0.0159032	0.736223	0.00478965
ENSMUSG00000023951	Vegfa	protein_coding	1	0.0185361	0.719646	0.0278644
ENSMUSG00000036256	Igfbp7	protein_coding	1	0.0210726	0.706317	0.0103876
ENSMUSG00000076138	Gm26377	miRNA	1	0.0308179	0.727151	0.00128117
ENSMUSG00000030351	Tspan11	protein_coding	1	0.038134	0.668907	0.199683
ENSMUSG00000062785	Kcnc3	protein_coding	1	0.0392459	0.668683	0.202993
ENSMUSG00000022144	Gdnf	protein_coding	1	0.0523231	0.649866	0.276609
ENSMUSG00000060586	H2-Eb1	protein_coding	1	0.0606322	0.719758	0.287798
ENSMUSG00000018339	Gpx3	protein_coding	1	0.0678047	0.653114	0.274437
ENSMUSG00000041390	Mdfic	protein_coding	1	0.0688275	0.689292	0.0822504
ENSMUSG00000020566	Atp6v1c2	protein_coding	1	0.0731363	0.671595	0.338808
ENSMUSG00000048120	Entpd1	protein_coding	1	0.0748807	0.665659	0.387515
ENSMUSG00000029817	Tra2a	protein_coding	1	0.083028	0.721214	0.11555
ENSMUSG00000011256	Adam19	protein_coding	1	0.0892468	0.690636	0.351611
ENSMUSG00000026728	Vim	protein_coding	1	0.0985569	0.650314	0.453044
ENSMUSG00000035805	Mlc1	protein_coding	1	0.107977	0.658602	0.571892
ENSMUSG00000064246	Chil1	protein_coding	1	0.111733	0.718638	0.548182
ENSMUSG00000060703	Cd302	protein_coding	1	0.112958	0.666107	0.491704
ENSMUSG00000021835	Bmp4	protein_coding	1	0.142575	0.696237	0.715767
ENSMUSG00000033595	Lgi3	protein_coding	1	0.153029	0.66353	0.366509
ENSMUSG00000047250	Ptgs1	protein_coding	1	0.161229	0.674507	0.759438
ENSMUSG00000020120	Plek	protein_coding	1	0.163632	0.650986	0.627965
ENSMUSG00000029522	Pla2g1b	protein_coding	1	0.245596	0.661178	0.799073
ENSMUSG00000053702	Nebl	protein_coding	1	0.281074	0.664875	1
ENSMUSG00000073421	H2-Ab1	protein_coding	1	0.338593	0.706765	0.0230129
ENSMUSG00000026249	Serpine2	protein_coding	1	0.362243	0.680108	0.135249
ENSMUSG00000024538	Ppic	protein_coding	1	0.37352	0.69198	0.290959
ENSMUSG00000048960	Prex2	protein_coding	1	0.395903	0.702845	0.00913809
ENSMUSG00000064339	mt-Rnr2	Mt_rRNA	1	0.426652	0.704301	1
ENSMUSG00000021268	Meg3	lincRNA	1	0.439695	0.662186	1
ENSMUSG00000064356	mt-Atp8	protein_coding	1	0.467984	0.703181	1
ENSMUSG00000032554	Trf	protein_coding	1	0.484128	0.69086	0.933893
ENSMUSG00000022048	Dpysl2	protein_coding	1	0.515913	0.700493	0.291551
ENSMUSG00000055322	Tns1	protein_coding	1	0.51823	0.690636	1
ENSMUSG00000020044	Timp3	protein_coding	1	0.575317	0.682236	0.965811
ENSMUSG00000078607	1810010H24Rik	protein_coding	1	0.608711	0.629032	1
ENSMUSG00000033361	Prrg3	protein_coding	1	0.663573	0.65961	1
ENSMUSG00000022799	Arhgap31	protein_coding	1	0.680825	0.66073	1
ENSMUSG00000028341	Nr4a3	protein_coding	1	0.738847	0.662522	0.64384
ENSMUSG00000041548	Hspb8	protein_coding	1	0.741661	0.627464	1
ENSMUSG00000018819	Lsp1	protein_coding	1	0.927875	0.618168	1
ENSMUSG00000029641	Rasl11a	protein_coding	1	0.941631	0.618056	1
ENSMUSG00000060459	Kng2	protein_coding	1	0.941631	0.618056	1
ENSMUSG00000030934	Oat	protein_coding	1	1	0.638777	0.000990631
ENSMUSG00000031278	Acsl4	protein_coding	1	1	0.677979	0.0011006
ENSMUSG00000085715	Tsix	antisense	1	1	0.639673	0.00198577
ENSMUSG00000054720	Lrrc8c	protein_coding	1	1	0.669355	0.00790781
ENSMUSG00000079523	Tmsb10	protein_coding	1	1	0.629816	0.0293442
ENSMUSG00000038872	Zfhx3	protein_coding	1	1	0.62892	0.234329
ENSMUSG00000105008	Gm43652	TEC	1	1	0.681004	0.27086
ENSMUSG00000031503	Col4a2	protein_coding	1	1	0.623656	0.546042
ENSMUSG00000035901	Dennd5a	protein_coding	1	1	0.6278	0.684821
ENSMUSG00000064352	mt-Ts1	Mt_tRNA	1	1	0.688844	0.701513
ENSMUSG00000031722	Hp	protein_coding	1	1	0.637097	0.856702
ENSMUSG00000000056	Narf	protein_coding	1	1	0.543795	1
ENSMUSG00000000278	Scpep1	protein_coding	1	1	0.52957	1
ENSMUSG00000000402	Egfl6	protein_coding	1	1	0.611783	1
ENSMUSG00000000409	Lck	protein_coding	1	1	0.52677	1
ENSMUSG00000000682	Cd52	protein_coding	1	1	0.583109	1
ENSMUSG00000000811	Txnrd3	protein_coding	1	1	0.565636	1
ENSMUSG00000001100	Poldip2	protein_coding	1	1	0.518929	1
ENSMUSG00000001105	Ift20	protein_coding	1	1	0.549955	1
ENSMUSG00000001131	Timp1	protein_coding	1	1	0.624888	1
ENSMUSG00000001143	Lman2l	protein_coding	1	1	0.549059	1
ENSMUSG00000001151	Pcnt	protein_coding	1	1	0.617047	1
ENSMUSG00000001175	Calm1	protein_coding	1	1	0.600806	1
ENSMUSG00000001270	Ckb	protein_coding	1	1	0.582437	1
ENSMUSG00000001506	Col1a1	protein_coding	1	1	0.574149	1
ENSMUSG00000001521	Tulp3	protein_coding	1	1	0.536066	1
ENSMUSG00000001687	Ubl3	protein_coding	1	1	0.563396	1
ENSMUSG00000001829	Clpb	protein_coding	1	1	0.580085	1
ENSMUSG00000001918	Slc1a5	protein_coding	1	1	0.602263	1
ENSMUSG00000002058	Unc119	protein_coding	1	1	0.538082	1
ENSMUSG00000002059	Rab34	protein_coding	1	1	0.554884	1
ENSMUSG00000002486	Tchp	protein_coding	1	1	0.55578	1
ENSMUSG00000002845	Tmem39a	protein_coding	1	1	0.542563	1
ENSMUSG00000002985	Apoe	protein_coding	1	1	0.596998	1
ENSMUSG00000003134	Tbc1d8	protein_coding	1	1	0.556676	1
ENSMUSG00000003200	Sh3gl1	protein_coding	1	1	0.56138	1
ENSMUSG00000003308	Keap1	protein_coding	1	1	0.546707	1
ENSMUSG00000003604	Aven	protein_coding	1	1	0.539763	1
ENSMUSG00000003882	Il7r	protein_coding	1	1	0.586134	1
ENSMUSG00000004347	Pde1c	protein_coding	1	1	0.52845	1
ENSMUSG00000004665	Cnn2	protein_coding	1	1	0.595766	1
ENSMUSG00000004988	Fxyd4	protein_coding	1	1	0.643033	1
ENSMUSG00000005089	Slc1a2	protein_coding	1	1	0.521281	1
ENSMUSG00000005124	Wisp1	protein_coding	1	1	0.528338	1
ENSMUSG00000005198	Polr2a	protein_coding	1	1	0.587814	1
ENSMUSG00000005360	Slc1a3	protein_coding	1	1	0.584117	1
ENSMUSG00000005413	Hmox1	protein_coding	1	1	0.563732	1
ENSMUSG00000005949	Ctns	protein_coding	1	1	0.536402	1
ENSMUSG00000006390	Elovl1	protein_coding	1	1	0.568324	1
ENSMUSG00000006611	Hfe	protein_coding	1	1	0.543795	1
ENSMUSG00000007617	Homer1	protein_coding	1	1	0.542227	1
ENSMUSG00000007670	Khsrp	protein_coding	1	1	0.593862	1
ENSMUSG00000009030	Pdcl	protein_coding	1	1	0.507168	1
ENSMUSG00000009114	2610028H24Rik	protein_coding	1	1	0.603831	1
ENSMUSG00000009687	Fxyd5	protein_coding	1	1	0.532258	1
ENSMUSG00000009772	Nuak2	protein_coding	1	1	0.541219	1
ENSMUSG00000010095	Slc3a2	protein_coding	1	1	0.599798	1
ENSMUSG00000010663	Fads1	protein_coding	1	1	0.556004	1
ENSMUSG00000011148	Adssl1	protein_coding	1	1	0.603607	1
ENSMUSG00000013089	Etv5	protein_coding	1	1	0.656026	1
ENSMUSG00000013160	Atp6v0d1	protein_coding	1	1	0.561828	1
ENSMUSG00000014039	Prdm15	protein_coding	1	1	0.508961	1
ENSMUSG00000015093	Clic3	protein_coding	1	1	0.638329	1
ENSMUSG00000015340	Cybb	protein_coding	1	1	0.55858	1
ENSMUSG00000015396	Cd83	protein_coding	1	1	0.56306	1
ENSMUSG00000015568	Lpl	protein_coding	1	1	0.584229	1
ENSMUSG00000016128	Stard13	protein_coding	1	1	0.544131	1
ENSMUSG00000016256	Ctsz	protein_coding	1	1	0.53517	1
ENSMUSG00000016933	Plcg1	protein_coding	1	1	0.520609	1
ENSMUSG00000016995	Matn4	protein_coding	1	1	0.567204	1
ENSMUSG00000017002	Slpi	protein_coding	1	1	0.566532	1
ENSMUSG00000017007	Rbpjl	protein_coding	1	1	0.620296	1
ENSMUSG00000017561	Crlf3	protein_coding	1	1	0.525538	1
ENSMUSG00000017670	Elmo2	protein_coding	1	1	0.557908	1
ENSMUSG00000017679	Ttpal	protein_coding	1	1	0.535506	1
ENSMUSG00000017715	Pgs1	protein_coding	1	1	0.546707	1
ENSMUSG00000017723	Wfdc2	protein_coding	1	1	0.534498	1
ENSMUSG00000017778	Cox7c	protein_coding	1	1	0.535618	1
ENSMUSG00000018040	Rrp7a	protein_coding	1	1	0.506832	1
ENSMUSG00000018209	Stk4	protein_coding	1	1	0.632953	1
ENSMUSG00000018217	Pmp22	protein_coding	1	1	0.608871	1
ENSMUSG00000018372	Cep95	protein_coding	1	1	0.515121	1
ENSMUSG00000018752	Tnfsfm13	protein_coding	1	1	0.529122	1
ENSMUSG00000018927	Ccl6	protein_coding	1	1	0.581093	1
ENSMUSG00000019132	BC005537	protein_coding	1	1	0.533602	1
ENSMUSG00000019254	Ppp1r12c	protein_coding	1	1	0.507504	1
ENSMUSG00000019368	Sec14l4	protein_coding	1	1	0.615143	1
ENSMUSG00000019373	Cops3	protein_coding	1	1	0.552979	1
ENSMUSG00000019437	Tlcd1	protein_coding	1	1	0.50728	1
ENSMUSG00000019464	Ptger1	protein_coding	1	1	0.549619	1
ENSMUSG00000019528	Gyg	protein_coding	1	1	0.522401	1
ENSMUSG00000019726	Lyst	protein_coding	1	1	0.610327	1
ENSMUSG00000019813	Cep57l1	protein_coding	1	1	0.518817	1
ENSMUSG00000019852	Arfgef3	protein_coding	1	1	0.615479	1
ENSMUSG00000019893	Ros1	protein_coding	1	1	0.535282	1
ENSMUSG00000019916	P4ha1	protein_coding	1	1	0.652106	1
ENSMUSG00000019917	43353	protein_coding	1	1	0.611335	1
ENSMUSG00000019970	Sgk1	protein_coding	1	1	0.618616	1
ENSMUSG00000019990	Pde7b	protein_coding	1	1	0.59487	1
ENSMUSG00000019992	Mtfr2	protein_coding	1	1	0.534498	1
ENSMUSG00000020017	Hal	protein_coding	1	1	0.523297	1
ENSMUSG00000020029	Nudt4	protein_coding	1	1	0.557012	1
ENSMUSG00000020034	Tcp11l2	protein_coding	1	1	0.59991	1
ENSMUSG00000020063	Sirt1	protein_coding	1	1	0.519153	1
ENSMUSG00000020070	Rufy2	protein_coding	1	1	0.535282	1
ENSMUSG00000020130	Tbc1d15	protein_coding	1	1	0.540995	1
ENSMUSG00000020140	Lgr5	protein_coding	1	1	0.532482	1
ENSMUSG00000020171	Yeats4	protein_coding	1	1	0.505712	1
ENSMUSG00000020176	Grb10	protein_coding	1	1	0.573589	1
ENSMUSG00000020183	Cpm	protein_coding	1	1	0.65009	1
ENSMUSG00000020241	Col6a2	protein_coding	1	1	0.53349	1
ENSMUSG00000020262	Adarb1	protein_coding	1	1	0.540323	1
ENSMUSG00000020286	1700093K21Rik	protein_coding	1	1	0.524978	1
ENSMUSG00000020448	Rnf185	protein_coding	1	1	0.558244	1
ENSMUSG00000020459	Mtif2	protein_coding	1	1	0.546483	1
ENSMUSG00000020473	Aebp1	protein_coding	1	1	0.556004	1
ENSMUSG00000020532	Acaca	protein_coding	1	1	0.629368	1
ENSMUSG00000020564	Atxn7l1	protein_coding	1	1	0.533266	1
ENSMUSG00000020571	Pdia6	protein_coding	1	1	0.549283	1
ENSMUSG00000020642	Rnf144a	protein_coding	1	1	0.55858	1
ENSMUSG00000020715	Ern1	protein_coding	1	1	0.524978	1
ENSMUSG00000020718	Polg2	protein_coding	1	1	0.557236	1
ENSMUSG00000020719	Ddx5	protein_coding	1	1	0.538082	1
ENSMUSG00000020847	Rph3al	protein_coding	1	1	0.517473	1
ENSMUSG00000020917	Acly	protein_coding	1	1	0.542115	1
ENSMUSG00000020935	Dcakd	protein_coding	1	1	0.526994	1
ENSMUSG00000021003	Galc	protein_coding	1	1	0.577845	1
ENSMUSG00000021033	Gstz1	protein_coding	1	1	0.510193	1
ENSMUSG00000021062	Rab15	protein_coding	1	1	0.554435	1
ENSMUSG00000021069	Pygl	protein_coding	1	1	0.568884	1
ENSMUSG00000021094	Dhrs7	protein_coding	1	1	0.545923	1
ENSMUSG00000021125	Arg2	protein_coding	1	1	0.5653	1
ENSMUSG00000021190	Lgmn	protein_coding	1	1	0.528338	1
ENSMUSG00000021226	Acot2	protein_coding	1	1	0.551411	1
ENSMUSG00000021298	Gpr132	protein_coding	1	1	0.586134	1
ENSMUSG00000021559	Dapk1	protein_coding	1	1	0.612231	1
ENSMUSG00000021684	Pde8b	protein_coding	1	1	0.553987	1
ENSMUSG00000021690	Jmy	protein_coding	1	1	0.518369	1
ENSMUSG00000021712	Trim23	protein_coding	1	1	0.510865	1
ENSMUSG00000021745	Ptprg	protein_coding	1	1	0.542451	1
ENSMUSG00000021760	Gpx8	protein_coding	1	1	0.586134	1
ENSMUSG00000021779	Thrb	protein_coding	1	1	0.540547	1
ENSMUSG00000021795	Sftpd	protein_coding	1	1	0.519937	1
ENSMUSG00000021820	Camk2g	protein_coding	1	1	0.518481	1
ENSMUSG00000021879	Dnah12	protein_coding	1	1	0.565636	1
ENSMUSG00000021922	Itih4	protein_coding	1	1	0.532146	1
ENSMUSG00000021998	Lcp1	protein_coding	1	1	0.584005	1
ENSMUSG00000022090	Pdlim2	protein_coding	1	1	0.552195	1
ENSMUSG00000022098	Bmp1	protein_coding	1	1	0.59879	1
ENSMUSG00000022150	Dab2	protein_coding	1	1	0.537186	1
ENSMUSG00000022181	C6	protein_coding	1	1	0.616711	1
ENSMUSG00000022197	Pdzd2	protein_coding	1	1	0.518481	1
ENSMUSG00000022205	Sub1	protein_coding	1	1	0.629256	1
ENSMUSG00000022240	Ctnnd2	protein_coding	1	1	0.548275	1
ENSMUSG00000022292	Rrm2b	protein_coding	1	1	0.504592	1
ENSMUSG00000022297	Fzd6	protein_coding	1	1	0.505488	1
ENSMUSG00000022305	Lrp12	protein_coding	1	1	0.531474	1
ENSMUSG00000022372	Sla	protein_coding	1	1	0.550851	1
ENSMUSG00000022389	Tef	protein_coding	1	1	0.566532	1
ENSMUSG00000022479	Vdr	protein_coding	1	1	0.566532	1
ENSMUSG00000022528	Hes1	protein_coding	1	1	0.682348	1
ENSMUSG00000022540	Rogdi	protein_coding	1	1	0.517585	1
ENSMUSG00000022591	Gm9747	protein_coding	1	1	0.554211	1
ENSMUSG00000022637	Cblb	protein_coding	1	1	0.590726	1
ENSMUSG00000022639	Dubr	lincRNA	1	1	0.545139	1
ENSMUSG00000022807	Osbpl11	protein_coding	1	1	0.542003	1
ENSMUSG00000022816	Fstl1	protein_coding	1	1	0.604615	1
ENSMUSG00000022822	Abcc5	protein_coding	1	1	0.533154	1
ENSMUSG00000022836	Mylk	protein_coding	1	1	0.621304	1
ENSMUSG00000022837	Iqcb1	protein_coding	1	1	0.546595	1
ENSMUSG00000022863	Btg3	protein_coding	1	1	0.570453	1
ENSMUSG00000022864	D16Ertd472e	protein_coding	1	1	0.567316	1
ENSMUSG00000022876	Samsn1	protein_coding	1	1	0.554323	1
ENSMUSG00000022899	Slc15a2	protein_coding	1	1	0.585909	1
ENSMUSG00000023008	Fmnl3	protein_coding	1	1	0.562276	1
ENSMUSG00000023074	Mospd1	protein_coding	1	1	0.513777	1
ENSMUSG00000023224	Serping1	protein_coding	1	1	0.541331	1
ENSMUSG00000023284	Zfp605	protein_coding	1	1	0.550291	1
ENSMUSG00000023927	Satb1	protein_coding	1	1	0.583781	1
ENSMUSG00000024037	Wdr4	protein_coding	1	1	0.52621	1
ENSMUSG00000024052	Lpin2	protein_coding	1	1	0.549731	1
ENSMUSG00000024059	Clip4	protein_coding	1	1	0.658602	1
ENSMUSG00000024063	Lbh	protein_coding	1	1	0.573253	1
ENSMUSG00000024084	Qpct	protein_coding	1	1	0.550179	1
ENSMUSG00000024091	Vapa	protein_coding	1	1	0.573477	1
ENSMUSG00000024130	Abca3	protein_coding	1	1	0.638889	1
ENSMUSG00000024140	Epas1	protein_coding	1	1	0.627464	1
ENSMUSG00000024238	Zeb1	protein_coding	1	1	0.577845	1
ENSMUSG00000024277	Mapre2	protein_coding	1	1	0.558692	1
ENSMUSG00000024299	Adamts10	protein_coding	1	1	0.566756	1
ENSMUSG00000024422	Dhx16	protein_coding	1	1	0.539203	1
ENSMUSG00000024423	Impact	protein_coding	1	1	0.572469	1
ENSMUSG00000024429	Gnl1	protein_coding	1	1	0.562388	1
ENSMUSG00000024613	Tcof1	protein_coding	1	1	0.568996	1
ENSMUSG00000024653	Scgb1a1	protein_coding	1	1	0.550851	1
ENSMUSG00000024661	Fth1	protein_coding	1	1	0.529122	1
ENSMUSG00000024664	Fads3	protein_coding	1	1	0.626792	1
ENSMUSG00000024737	Slc15a3	protein_coding	1	1	0.524642	1
ENSMUSG00000024747	Aldh1a7	protein_coding	1	1	0.555108	1
ENSMUSG00000024810	Il33	protein_coding	1	1	0.55522	1
ENSMUSG00000024867	Pip5k1b	protein_coding	1	1	0.572693	1
ENSMUSG00000024878	Cbwd1	protein_coding	1	1	0.520385	1
ENSMUSG00000024906	Mus81	protein_coding	1	1	0.527442	1
ENSMUSG00000024935	Slc1a1	protein_coding	1	1	0.552307	1
ENSMUSG00000024948	Map4k2	protein_coding	1	1	0.526546	1
ENSMUSG00000024981	Acsl5	protein_coding	1	1	0.572693	1
ENSMUSG00000025010	Ccnj	protein_coding	1	1	0.52789	1
ENSMUSG00000025036	Sfxn2	protein_coding	1	1	0.559252	1
ENSMUSG00000025153	Fasn	protein_coding	1	1	0.623992	1
ENSMUSG00000025196	Cpn1	protein_coding	1	1	0.544019	1
ENSMUSG00000025203	Scd2	protein_coding	1	1	0.60103	1
ENSMUSG00000025316	Banp	protein_coding	1	1	0.523634	1
ENSMUSG00000025324	Atp10a	protein_coding	1	1	0.557012	1
ENSMUSG00000025366	Esyt1	protein_coding	1	1	0.539091	1
ENSMUSG00000025369	Smarcc2	protein_coding	1	1	0.504032	1
ENSMUSG00000025408	Ddit3	protein_coding	1	1	0.535058	1
ENSMUSG00000025437	Usp33	protein_coding	1	1	0.562276	1
ENSMUSG00000025537	Phkg1	protein_coding	1	1	0.538194	1
ENSMUSG00000025574	Tk1	protein_coding	1	1	0.528338	1
ENSMUSG00000025579	Gaa	protein_coding	1	1	0.55802	1
ENSMUSG00000025648	Pfkfb4	protein_coding	1	1	0.580309	1
ENSMUSG00000025746	Il6	protein_coding	1	1	0.563396	1
ENSMUSG00000025747	Tyms	protein_coding	1	1	0.521953	1
ENSMUSG00000025815	Dhtkd1	protein_coding	1	1	0.538642	1
ENSMUSG00000025915	Sgk3	protein_coding	1	1	0.536514	1
ENSMUSG00000026070	Il18r1	protein_coding	1	1	0.611111	1
ENSMUSG00000026094	Stk17b	protein_coding	1	1	0.62556	1
ENSMUSG00000026107	Nabp1	protein_coding	1	1	0.588598	1
ENSMUSG00000026158	Ogfrl1	protein_coding	1	1	0.588934	1
ENSMUSG00000026240	Cops7b	protein_coding	1	1	0.553651	1
ENSMUSG00000026288	Inpp5d	protein_coding	1	1	0.527778	1
ENSMUSG00000026347	Tmem163	protein_coding	1	1	0.595206	1
ENSMUSG00000026358	Rgs1	protein_coding	1	1	0.572805	1
ENSMUSG00000026384	Ptpn4	protein_coding	1	1	0.522625	1
ENSMUSG00000026601	Axdnd1	protein_coding	1	1	0.534386	1
ENSMUSG00000026626	Ppp2r5a	protein_coding	1	1	0.535506	1
ENSMUSG00000026657	Frmd4a	protein_coding	1	1	0.537746	1
ENSMUSG00000026662	Sephs1	protein_coding	1	1	0.512545	1
ENSMUSG00000026705	Klhl20	protein_coding	1	1	0.55802	1
ENSMUSG00000026786	Apbb1ip	protein_coding	1	1	0.548051	1
ENSMUSG00000026872	Zeb2	protein_coding	1	1	0.579749	1
ENSMUSG00000026874	Hc	protein_coding	1	1	0.634409	1
ENSMUSG00000026879	Gsn	protein_coding	1	1	0.568996	1
ENSMUSG00000026888	Grb14	protein_coding	1	1	0.575045	1
ENSMUSG00000027009	Itga4	protein_coding	1	1	0.511985	1
ENSMUSG00000027030	Stk39	protein_coding	1	1	0.529234	1
ENSMUSG00000027070	Lrp2	protein_coding	1	1	0.614247	1
ENSMUSG00000027186	Elf5	protein_coding	1	1	0.610663	1
ENSMUSG00000027187	Cat	protein_coding	1	1	0.519937	1
ENSMUSG00000027339	Rassf2	protein_coding	1	1	0.644377	1
ENSMUSG00000027340	Slc23a2	protein_coding	1	1	0.643369	1
ENSMUSG00000027360	Hdc	protein_coding	1	1	0.626904	1
ENSMUSG00000027380	Acoxl	protein_coding	1	1	0.580645	1
ENSMUSG00000027395	Polr1b	protein_coding	1	1	0.525202	1
ENSMUSG00000027398	Il1b	protein_coding	1	1	0.564516	1
ENSMUSG00000027423	Snx5	protein_coding	1	1	0.542339	1
ENSMUSG00000027439	Gzf1	protein_coding	1	1	0.599798	1
ENSMUSG00000027447	Cst3	protein_coding	1	1	0.565412	1
ENSMUSG00000027454	Gins1	protein_coding	1	1	0.562388	1
ENSMUSG00000027472	Pdrg1	protein_coding	1	1	0.549843	1
ENSMUSG00000027498	Cstf1	protein_coding	1	1	0.526658	1
ENSMUSG00000027533	Fabp5	protein_coding	1	1	0.616263	1
ENSMUSG00000027602	Map1lc3a	protein_coding	1	1	0.569668	1
ENSMUSG00000027628	Aar2	protein_coding	1	1	0.510977	1
ENSMUSG00000027669	Gnb4	protein_coding	1	1	0.516017	1
ENSMUSG00000027671	Actl6a	protein_coding	1	1	0.515793	1
ENSMUSG00000027698	Nceh1	protein_coding	1	1	0.541779	1
ENSMUSG00000027706	Sec62	protein_coding	1	1	0.50672	1
ENSMUSG00000027778	Ift80	protein_coding	1	1	0.56586	1
ENSMUSG00000027805	Pfn2	protein_coding	1	1	0.528562	1
ENSMUSG00000027820	Mme	protein_coding	1	1	0.610887	1
ENSMUSG00000027985	Lef1	protein_coding	1	1	0.543907	1
ENSMUSG00000027993	Trim2	protein_coding	1	1	0.507392	1
ENSMUSG00000028047	Thbs3	protein_coding	1	1	0.565636	1
ENSMUSG00000028111	Ctsk	protein_coding	1	1	0.592966	1
ENSMUSG00000028179	Cth	protein_coding	1	1	0.55746	1
ENSMUSG00000028385	Snx30	protein_coding	1	1	0.593974	1
ENSMUSG00000028420	Tmem38b	protein_coding	1	1	0.538306	1
ENSMUSG00000028459	Cd72	protein_coding	1	1	0.580197	1
ENSMUSG00000028581	Laptm5	protein_coding	1	1	0.566196	1
ENSMUSG00000028648	Ndufs5	protein_coding	1	1	0.520833	1
ENSMUSG00000028677	Rnf220	protein_coding	1	1	0.522625	1
ENSMUSG00000028702	Rad54l	protein_coding	1	1	0.515233	1
ENSMUSG00000028706	Nsun4	protein_coding	1	1	0.507616	1
ENSMUSG00000028760	Eif4g3	protein_coding	1	1	0.546147	1
ENSMUSG00000028789	Azin2	protein_coding	1	1	0.529682	1
ENSMUSG00000028894	Inpp5b	protein_coding	1	1	0.567876	1
ENSMUSG00000028917	Plekhm2	protein_coding	1	1	0.549843	1
ENSMUSG00000028980	H6pd	protein_coding	1	1	0.544019	1
ENSMUSG00000028986	Klhl7	protein_coding	1	1	0.505936	1
ENSMUSG00000028995	Fam126a	protein_coding	1	1	0.581205	1
ENSMUSG00000029125	Stx18	protein_coding	1	1	0.524754	1
ENSMUSG00000029167	Ppargc1a	protein_coding	1	1	0.587814	1
ENSMUSG00000029186	Pi4k2b	protein_coding	1	1	0.567764	1
ENSMUSG00000029221	Slc30a9	protein_coding	1	1	0.510081	1
ENSMUSG00000029231	Pdgfra	protein_coding	1	1	0.542787	1
ENSMUSG00000029344	Tpst2	protein_coding	1	1	0.565412	1
ENSMUSG00000029406	Pitpnm2	protein_coding	1	1	0.595318	1
ENSMUSG00000029416	Slc15a4	protein_coding	1	1	0.518481	1
ENSMUSG00000029461	Fam168a	protein_coding	1	1	0.517809	1
ENSMUSG00000029464	Gpn3	protein_coding	1	1	0.554211	1
ENSMUSG00000029469	Ift81	protein_coding	1	1	0.518481	1
ENSMUSG00000029475	Kdm2b	protein_coding	1	1	0.5597	1
ENSMUSG00000029563	Foxp2	protein_coding	1	1	0.601927	1
ENSMUSG00000029569	Tmem168	protein_coding	1	1	0.530242	1
ENSMUSG00000029638	Glcci1	protein_coding	1	1	0.534946	1
ENSMUSG00000029661	Col1a2	protein_coding	1	1	0.572805	1
ENSMUSG00000029675	Eln	protein_coding	1	1	0.556004	1
ENSMUSG00000029676	Pot1a	protein_coding	1	1	0.55746	1
ENSMUSG00000029761	Cald1	protein_coding	1	1	0.605287	1
ENSMUSG00000029765	Plxna4	protein_coding	1	1	0.619512	1
ENSMUSG00000030022	Adamts9	protein_coding	1	1	0.549955	1
ENSMUSG00000030067	Foxp1	protein_coding	1	1	0.581989	1
ENSMUSG00000030123	Plxnd1	protein_coding	1	1	0.560708	1
ENSMUSG00000030134	Rasgef1a	protein_coding	1	1	0.559476	1
ENSMUSG00000030220	Arhgdib	protein_coding	1	1	0.543347	1
ENSMUSG00000030309	Caprin2	protein_coding	1	1	0.590838	1
ENSMUSG00000030340	Scnn1a	protein_coding	1	1	0.607639	1
ENSMUSG00000030401	Rtn2	protein_coding	1	1	0.542675	1
ENSMUSG00000030527	Crtc3	protein_coding	1	1	0.568996	1
ENSMUSG00000030545	Pex11a	protein_coding	1	1	0.526882	1
ENSMUSG00000030559	Rab38	protein_coding	1	1	0.544915	1
ENSMUSG00000030579	Tyrobp	protein_coding	1	1	0.565188	1
ENSMUSG00000030588	Yif1b	protein_coding	1	1	0.548051	1
ENSMUSG00000030647	Ndufc2	protein_coding	1	1	0.558132	1
ENSMUSG00000030654	Arl6ip1	protein_coding	1	1	0.515009	1
ENSMUSG00000030707	Coro1a	protein_coding	1	1	0.59319	1
ENSMUSG00000030708	Dnajb13	protein_coding	1	1	0.513105	1
ENSMUSG00000030741	Spns1	protein_coding	1	1	0.531138	1
ENSMUSG00000030785	Cox6a2	protein_coding	1	1	0.585461	1
ENSMUSG00000030844	Rgs10	protein_coding	1	1	0.600358	1
ENSMUSG00000030921	Trim30a	protein_coding	1	1	0.549283	1
ENSMUSG00000030956	Fam53b	protein_coding	1	1	0.591734	1
ENSMUSG00000030965	Fam175b	protein_coding	1	1	0.506496	1
ENSMUSG00000031024	St5	protein_coding	1	1	0.550179	1
ENSMUSG00000031134	Rbmx	protein_coding	1	1	0.512097	1
ENSMUSG00000031167	Rbm3	protein_coding	1	1	0.524082	1
ENSMUSG00000031239	Itm2a	protein_coding	1	1	0.589942	1
ENSMUSG00000031266	Gla	protein_coding	1	1	0.533154	1
ENSMUSG00000031304	Il2rg	protein_coding	1	1	0.603271	1
ENSMUSG00000031387	Renbp	protein_coding	1	1	0.643481	1
ENSMUSG00000031431	Tsc22d3	protein_coding	1	1	0.513553	1
ENSMUSG00000031441	Atp11a	protein_coding	1	1	0.657258	1
ENSMUSG00000031523	Dlc1	protein_coding	1	1	0.567988	1
ENSMUSG00000031575	Ash2l	protein_coding	1	1	0.513553	1
ENSMUSG00000031596	Slc7a2	protein_coding	1	1	0.53797	1
ENSMUSG00000031634	Ufsp2	protein_coding	1	1	0.528226	1
ENSMUSG00000031647	Mfap3l	protein_coding	1	1	0.601815	1
ENSMUSG00000031660	Brd7	protein_coding	1	1	0.572133	1
ENSMUSG00000031661	Nkd1	protein_coding	1	1	0.586246	1
ENSMUSG00000031751	Amfr	protein_coding	1	1	0.555332	1
ENSMUSG00000031762	Mt2	protein_coding	1	1	0.602039	1
ENSMUSG00000031765	Mt1	protein_coding	1	1	0.617384	1
ENSMUSG00000031812	Map1lc3b	protein_coding	1	1	0.520161	1
ENSMUSG00000031889	D230025D16Rik	protein_coding	1	1	0.555444	1
ENSMUSG00000031974	Abcb10	protein_coding	1	1	0.576053	1
ENSMUSG00000032062	2310030G06Rik	protein_coding	1	1	0.510865	1
ENSMUSG00000032194	Kank2	protein_coding	1	1	0.523634	1
ENSMUSG00000032198	Dock6	protein_coding	1	1	0.530802	1
ENSMUSG00000032235	Ice2	protein_coding	1	1	0.522625	1
ENSMUSG00000032238	Rora	protein_coding	1	1	0.588934	1
ENSMUSG00000032244	Fem1b	protein_coding	1	1	0.642697	1
ENSMUSG00000032298	Neil1	protein_coding	1	1	0.53293	1
ENSMUSG00000032359	Ctsh	protein_coding	1	1	0.562388	1
ENSMUSG00000032380	Dapk2	protein_coding	1	1	0.551747	1
ENSMUSG00000032553	Srprb	protein_coding	1	1	0.592854	1
ENSMUSG00000032602	Slc25a20	protein_coding	1	1	0.528114	1
ENSMUSG00000032673	Prorsd1	protein_coding	1	1	0.53069	1
ENSMUSG00000032688	Malt1	protein_coding	1	1	0.56698	1
ENSMUSG00000032715	Trib3	protein_coding	1	1	0.507056	1
ENSMUSG00000032740	Ccdc88a	protein_coding	1	1	0.581205	1
ENSMUSG00000032827	Ppp1r9a	protein_coding	1	1	0.667787	1
ENSMUSG00000032855	Pkd1	protein_coding	1	1	0.560036	1
ENSMUSG00000032946	Rasgrp2	protein_coding	1	1	0.556004	1
ENSMUSG00000032997	Chpf	protein_coding	1	1	0.568212	1
ENSMUSG00000033066	Gas7	protein_coding	1	1	0.552867	1
ENSMUSG00000033083	Tbc1d4	protein_coding	1	1	0.583669	1
ENSMUSG00000033105	Lss	protein_coding	1	1	0.523634	1
ENSMUSG00000033220	Rac2	protein_coding	1	1	0.590278	1
ENSMUSG00000033253	Szt2	protein_coding	1	1	0.523634	1
ENSMUSG00000033278	Ptprm	protein_coding	1	1	0.581877	1
ENSMUSG00000033396	Spg11	protein_coding	1	1	0.519153	1
ENSMUSG00000033478	Fam160b1	protein_coding	1	1	0.520273	1
ENSMUSG00000033629	Hacd3	protein_coding	1	1	0.582885	1
ENSMUSG00000033653	Vps8	protein_coding	1	1	0.527442	1
ENSMUSG00000033697	Arhgap39	protein_coding	1	1	0.532706	1
ENSMUSG00000033706	Smyd5	protein_coding	1	1	0.569556	1
ENSMUSG00000033720	Sfxn5	protein_coding	1	1	0.533378	1
ENSMUSG00000033902	Mapkbp1	protein_coding	1	1	0.562276	1
ENSMUSG00000033904	Ccp110	protein_coding	1	1	0.540435	1
ENSMUSG00000033917	Gde1	protein_coding	1	1	0.590502	1
ENSMUSG00000034120	Srsf2	protein_coding	1	1	0.521169	1
ENSMUSG00000034159	2310007B03Rik	protein_coding	1	1	0.580421	1
ENSMUSG00000034165	Ccnd3	protein_coding	1	1	0.579973	1
ENSMUSG00000034171	Faah	protein_coding	1	1	0.503136	1
ENSMUSG00000034189	Hsdl1	protein_coding	1	1	0.56138	1
ENSMUSG00000034271	Jdp2	protein_coding	1	1	0.593078	1
ENSMUSG00000034317	Trim59	protein_coding	1	1	0.552979	1
ENSMUSG00000034349	Smc4	protein_coding	1	1	0.620968	1
ENSMUSG00000034467	Dynlrb2	protein_coding	1	1	0.576501	1
ENSMUSG00000034509	Mad2l1bp	protein_coding	1	1	0.515681	1
ENSMUSG00000034560	A230046K03Rik	protein_coding	1	1	0.596326	1
ENSMUSG00000034593	Myo5a	protein_coding	1	1	0.530802	1
ENSMUSG00000034663	Bmp2k	protein_coding	1	1	0.550403	1
ENSMUSG00000034673	Pbx2	protein_coding	1	1	0.522401	1
ENSMUSG00000034723	Tmx4	protein_coding	1	1	0.541443	1
ENSMUSG00000034771	Tle2	protein_coding	1	1	0.556676	1
ENSMUSG00000034810	Scn7a	protein_coding	1	1	0.589382	1
ENSMUSG00000034957	Cebpa	protein_coding	1	1	0.612231	1
ENSMUSG00000035000	Dpp4	protein_coding	1	1	0.562836	1
ENSMUSG00000035242	Oaz1	protein_coding	1	1	0.541331	1
ENSMUSG00000035268	Pkig	protein_coding	1	1	0.519601	1
ENSMUSG00000035311	Gnptab	protein_coding	1	1	0.5681	1
ENSMUSG00000035354	Uvrag	protein_coding	1	1	0.604615	1
ENSMUSG00000035385	Ccl2	protein_coding	1	1	0.521953	1
ENSMUSG00000035401	Emsy	protein_coding	1	1	0.522513	1
ENSMUSG00000035439	Haus8	protein_coding	1	1	0.513105	1
ENSMUSG00000035596	Mboat7	protein_coding	1	1	0.506944	1
ENSMUSG00000035877	Zhx3	protein_coding	1	1	0.583109	1
ENSMUSG00000035958	Tdp2	protein_coding	1	1	0.53573	1
ENSMUSG00000035967	Ddx26b	protein_coding	1	1	0.59655	1
ENSMUSG00000035969	Rusc2	protein_coding	1	1	0.543011	1
ENSMUSG00000035992	Fnip1	protein_coding	1	1	0.561156	1
ENSMUSG00000036273	Lrrk2	protein_coding	1	1	0.636761	1
ENSMUSG00000036368	Rmdn2	protein_coding	1	1	0.595094	1
ENSMUSG00000036432	Siah2	protein_coding	1	1	0.544915	1
ENSMUSG00000036473	Tbc1d24	protein_coding	1	1	0.542115	1
ENSMUSG00000036478	Btg1	protein_coding	1	1	0.550627	1
ENSMUSG00000036533	Cdc42ep3	protein_coding	1	1	0.612231	1
ENSMUSG00000036585	Fgf1	protein_coding	1	1	0.623992	1
ENSMUSG00000036745	Ttll7	protein_coding	1	1	0.549731	1
ENSMUSG00000036764	Dnajc12	protein_coding	1	1	0.521729	1
ENSMUSG00000036814	Slc6a20a	protein_coding	1	1	0.542675	1
ENSMUSG00000036863	Syde2	protein_coding	1	1	0.52677	1
ENSMUSG00000036905	C1qb	protein_coding	1	1	0.579637	1
ENSMUSG00000036918	Ttc7	protein_coding	1	1	0.52957	1
ENSMUSG00000036934	4921524J17Rik	protein_coding	1	1	0.531922	1
ENSMUSG00000036943	Rab8b	protein_coding	1	1	0.640569	1
ENSMUSG00000037025	Foxa2	protein_coding	1	1	0.52789	1
ENSMUSG00000037049	Smpd1	protein_coding	1	1	0.583109	1
ENSMUSG00000037266	Rsrp1	protein_coding	1	1	0.654906	1
ENSMUSG00000037300	Ttc13	protein_coding	1	1	0.557124	1
ENSMUSG00000037348	Paqr7	protein_coding	1	1	0.537298	1
ENSMUSG00000037386	Rims2	protein_coding	1	1	0.507168	1
ENSMUSG00000037486	Asxl2	protein_coding	1	1	0.530242	1
ENSMUSG00000037563	Rps16	protein_coding	1	1	0.549955	1
ENSMUSG00000037649	H2-DMa	protein_coding	1	1	0.611671	1
ENSMUSG00000037669	Ldah	protein_coding	1	1	0.539987	1
ENSMUSG00000037685	Atp8a1	protein_coding	1	1	0.544131	1
ENSMUSG00000037692	Ahdc1	protein_coding	1	1	0.513553	1
ENSMUSG00000037736	Limch1	protein_coding	1	1	0.580757	1
ENSMUSG00000037754	Ppp1r16b	protein_coding	1	1	0.594086	1
ENSMUSG00000037822	Smim14	protein_coding	1	1	0.574821	1
ENSMUSG00000037868	Egr2	protein_coding	1	1	0.581765	1
ENSMUSG00000038034	Igsf8	protein_coding	1	1	0.513441	1
ENSMUSG00000038094	Atp13a4	protein_coding	1	1	0.53405	1
ENSMUSG00000038143	Stox2	protein_coding	1	1	0.529458	1
ENSMUSG00000038175	Mylip	protein_coding	1	1	0.56754	1
ENSMUSG00000038244	Mical2	protein_coding	1	1	0.519265	1
ENSMUSG00000038279	Nop2	protein_coding	1	1	0.533602	1
ENSMUSG00000038280	Ostm1	protein_coding	1	1	0.547603	1
ENSMUSG00000038291	Snx25	protein_coding	1	1	0.581205	1
ENSMUSG00000038344	Txlng	protein_coding	1	1	0.611335	1
ENSMUSG00000038375	Trp53inp2	protein_coding	1	1	0.643593	1
ENSMUSG00000038437	Mllt6	protein_coding	1	1	0.567876	1
ENSMUSG00000038453	Srcin1	protein_coding	1	1	0.551523	1
ENSMUSG00000038534	Osbpl7	protein_coding	1	1	0.515121	1
ENSMUSG00000038587	Akap12	protein_coding	1	1	0.576389	1
ENSMUSG00000038608	Dock10	protein_coding	1	1	0.561268	1
ENSMUSG00000038642	Ctss	protein_coding	1	1	0.659162	1
ENSMUSG00000038648	Creb3l2	protein_coding	1	1	0.540099	1
ENSMUSG00000038658	Ric1	protein_coding	1	1	0.585909	1
ENSMUSG00000038664	Herc1	protein_coding	1	1	0.540211	1
ENSMUSG00000038729	Akap2	protein_coding	1	1	0.55578	1
ENSMUSG00000038738	Shank1	protein_coding	1	1	0.538418	1
ENSMUSG00000038740	Mvb12b	protein_coding	1	1	0.573253	1
ENSMUSG00000038893	Fam117a	protein_coding	1	1	0.595878	1
ENSMUSG00000038894	Irs2	protein_coding	1	1	0.53629	1
ENSMUSG00000038895	Zfp653	protein_coding	1	1	0.530466	1
ENSMUSG00000038930	Rccd1	protein_coding	1	1	0.547715	1
ENSMUSG00000038936	Sccpdh	protein_coding	1	1	0.525202	1
ENSMUSG00000039089	L3mbtl3	protein_coding	1	1	0.53685	1
ENSMUSG00000039105	Atp6v1g1	protein_coding	1	1	0.605287	1
ENSMUSG00000039176	Polg	protein_coding	1	1	0.534274	1
ENSMUSG00000039191	Rbpj	protein_coding	1	1	0.558244	1
ENSMUSG00000039220	Ppp1r10	protein_coding	1	1	0.604727	1
ENSMUSG00000039270	Megf9	protein_coding	1	1	0.52565	1
ENSMUSG00000039382	Wdr45	protein_coding	1	1	0.504032	1
ENSMUSG00000039480	Nt5dc1	protein_coding	1	1	0.514897	1
ENSMUSG00000039497	Dse	protein_coding	1	1	0.585909	1
ENSMUSG00000039672	Kcne2	protein_coding	1	1	0.583109	1
ENSMUSG00000039715	Wdr34	protein_coding	1	1	0.522625	1
ENSMUSG00000039765	Cc2d2a	protein_coding	1	1	0.538306	1
ENSMUSG00000039826	Trub2	protein_coding	1	1	0.512881	1
ENSMUSG00000039831	Arhgap29	protein_coding	1	1	0.526994	1
ENSMUSG00000039883	Lrrc17	protein_coding	1	1	0.573813	1
ENSMUSG00000039934	Gsap	protein_coding	1	1	0.531586	1
ENSMUSG00000039987	Phtf2	protein_coding	1	1	0.52677	1
ENSMUSG00000040010	Slc7a5	protein_coding	1	1	0.518929	1
ENSMUSG00000040170	Fmo2	protein_coding	1	1	0.546595	1
ENSMUSG00000040212	Emp3	protein_coding	1	1	0.599014	1
ENSMUSG00000040268	Plekha1	protein_coding	1	1	0.547603	1
ENSMUSG00000040339	Fam102b	protein_coding	1	1	0.552083	1
ENSMUSG00000040524	Zfp609	protein_coding	1	1	0.547491	1
ENSMUSG00000040537	Adam22	protein_coding	1	1	0.537746	1
ENSMUSG00000040543	Pitpnm3	protein_coding	1	1	0.535618	1
ENSMUSG00000040564	Apoc1	protein_coding	1	1	0.636313	1
ENSMUSG00000040653	Ppp1r14c	protein_coding	1	1	0.634297	1
ENSMUSG00000040693	Slco4c1	protein_coding	1	1	0.62668	1
ENSMUSG00000040710	St8sia4	protein_coding	1	1	0.548499	1
ENSMUSG00000040713	Creg1	protein_coding	1	1	0.561492	1
ENSMUSG00000040747	Cd53	protein_coding	1	1	0.624104	1
ENSMUSG00000040751	Lat2	protein_coding	1	1	0.536178	1
ENSMUSG00000040752	Myh6	protein_coding	1	1	0.533938	1
ENSMUSG00000040852	Plekhh2	protein_coding	1	1	0.606183	1
ENSMUSG00000040929	Rfx3	protein_coding	1	1	0.53685	1
ENSMUSG00000040940	Arhgef1	protein_coding	1	1	0.568996	1
ENSMUSG00000040952	Rps19	protein_coding	1	1	0.601478	1
ENSMUSG00000041000	Trim62	protein_coding	1	1	0.538418	1
ENSMUSG00000041075	Fzd7	protein_coding	1	1	0.535282	1
ENSMUSG00000041453	Rpl21	protein_coding	1	1	0.581541	1
ENSMUSG00000041638	Gcn1l1	protein_coding	1	1	0.538194	1
ENSMUSG00000041695	Kcnj2	protein_coding	1	1	0.55578	1
ENSMUSG00000041777	Cir1	protein_coding	1	1	0.544579	1
ENSMUSG00000041831	Sytl3	protein_coding	1	1	0.507953	1
ENSMUSG00000042249	Adrbk2	protein_coding	1	1	0.64953	1
ENSMUSG00000042364	Snx18	protein_coding	1	1	0.573141	1
ENSMUSG00000042594	Sh2b3	protein_coding	1	1	0.509521	1
ENSMUSG00000042625	Safb2	protein_coding	1	1	0.548499	1
ENSMUSG00000042742	B630005N14Rik	protein_coding	1	1	0.551859	1
ENSMUSG00000042834	Nrep	protein_coding	1	1	0.543011	1
ENSMUSG00000043067	Dpy19l1	protein_coding	1	1	0.571349	1
ENSMUSG00000043323	Fbrsl1	protein_coding	1	1	0.513217	1
ENSMUSG00000043391	2510009E07Rik	protein_coding	1	1	0.521169	1
ENSMUSG00000043801	Oaz1-ps	pseudogene	1	1	0.539539	1
ENSMUSG00000044252	Osbpl1a	protein_coding	1	1	0.539203	1
ENSMUSG00000044330	Gm9790	processed_pseudogene	1	1	0.517921	1
ENSMUSG00000044340	Phlpp1	protein_coding	1	1	0.514001	1
ENSMUSG00000044349	Snhg11	protein_coding	1	1	0.561828	1
ENSMUSG00000044471	Lncpint	lincRNA	1	1	0.546035	1
ENSMUSG00000044645	Gm7334	protein_coding	1	1	0.578517	1
ENSMUSG00000044986	Tst	protein_coding	1	1	0.632504	1
ENSMUSG00000045294	Insig1	protein_coding	1	1	0.689852	1
ENSMUSG00000045382	Cxcr4	protein_coding	1	1	0.572805	1
ENSMUSG00000045414	1190002N15Rik	protein_coding	1	1	0.538866	1
ENSMUSG00000045503	Sys1	protein_coding	1	1	0.526434	1
ENSMUSG00000045690	Wdr89	protein_coding	1	1	0.56698	1
ENSMUSG00000045730	Adrb2	protein_coding	1	1	0.613015	1
ENSMUSG00000045896	Paip2b	protein_coding	1	1	0.563396	1
ENSMUSG00000045917	6330416G13Rik	protein_coding	1	1	0.550067	1
ENSMUSG00000046079	Lrrc8d	protein_coding	1	1	0.637993	1
ENSMUSG00000046351	Zfp322a	protein_coding	1	1	0.59151	1
ENSMUSG00000046352	Gjb2	protein_coding	1	1	0.508849	1
ENSMUSG00000046805	Mpeg1	protein_coding	1	1	0.534386	1
ENSMUSG00000046808	Atp10d	polymorphic_pseudogene	1	1	0.570901	1
ENSMUSG00000046947	Adck2	protein_coding	1	1	0.532482	1
ENSMUSG00000047767	Atg16l2	protein_coding	1	1	0.510977	1
ENSMUSG00000047854	Stx19	protein_coding	1	1	0.557684	1
ENSMUSG00000047867	Gimap6	protein_coding	1	1	0.611783	1
ENSMUSG00000048163	Selplg	protein_coding	1	1	0.59599	1
ENSMUSG00000048186	Bend7	protein_coding	1	1	0.58647	1
ENSMUSG00000048234	Rnf149	protein_coding	1	1	0.533378	1
ENSMUSG00000048307	Ankrd46	protein_coding	1	1	0.555444	1
ENSMUSG00000048332	Lhfp	protein_coding	1	1	0.536962	1
ENSMUSG00000048334	Gm8258	processed_pseudogene	1	1	0.506608	1
ENSMUSG00000048371	Pdp2	protein_coding	1	1	0.56586	1
ENSMUSG00000048865	Arhgap30	protein_coding	1	1	0.569108	1
ENSMUSG00000049001	Ndnf	protein_coding	1	1	0.603831	1
ENSMUSG00000049232	Tigd2	protein_coding	1	1	0.538306	1
ENSMUSG00000049421	Zfp260	protein_coding	1	1	0.541779	1
ENSMUSG00000049643	2310022A10Rik	protein_coding	1	1	0.522737	1
ENSMUSG00000049672	Zbtb14	protein_coding	1	1	0.512993	1
ENSMUSG00000049690	Nckap5	protein_coding	1	1	0.663306	1
ENSMUSG00000049723	Mmp12	protein_coding	1	1	0.527554	1
ENSMUSG00000049764	Zfp280b	protein_coding	1	1	0.519825	1
ENSMUSG00000049929	Lpar4	protein_coding	1	1	0.519153	1
ENSMUSG00000050079	Rspry1	protein_coding	1	1	0.524082	1
ENSMUSG00000050373	Snx21	protein_coding	1	1	0.560596	1
ENSMUSG00000050708	Ftl1	protein_coding	1	1	0.631496	1
ENSMUSG00000050737	Ptges	protein_coding	1	1	0.571573	1
ENSMUSG00000050777	Tmem37	protein_coding	1	1	0.519601	1
ENSMUSG00000050921	P2ry10	protein_coding	1	1	0.562836	1
ENSMUSG00000050973	Gdpgp1	protein_coding	1	1	0.558244	1
ENSMUSG00000051236	Msrb3	protein_coding	1	1	0.607303	1
ENSMUSG00000051285	Pcmtd1	protein_coding	1	1	0.552195	1
ENSMUSG00000051331	Cacna1c	protein_coding	1	1	0.567764	1
ENSMUSG00000051615	Rap2a	protein_coding	1	1	0.622648	1
ENSMUSG00000051669	AU021092	protein_coding	1	1	0.554323	1
ENSMUSG00000051747	Ttn	protein_coding	1	1	0.533266	1
ENSMUSG00000051890	Klhdc1	protein_coding	1	1	0.555444	1
ENSMUSG00000052102	Gnpda1	protein_coding	1	1	0.523634	1
ENSMUSG00000052544	St6galnac3	protein_coding	1	1	0.53013	1
ENSMUSG00000052713	Zfp608	protein_coding	1	1	0.568996	1
ENSMUSG00000052748	Swt1	protein_coding	1	1	0.570901	1
ENSMUSG00000052783	Grk4	protein_coding	1	1	0.554435	1
ENSMUSG00000052861	Dnah6	protein_coding	1	1	0.511313	1
ENSMUSG00000053093	Myh7	protein_coding	1	1	0.580533	1
ENSMUSG00000053398	Phgdh	protein_coding	1	1	0.544019	1
ENSMUSG00000053460	Ggcx	protein_coding	1	1	0.58647	1
ENSMUSG00000053483	Usp21	protein_coding	1	1	0.528562	1
ENSMUSG00000053580	Tanc2	protein_coding	1	1	0.670475	1
ENSMUSG00000053641	Dennd4a	protein_coding	1	1	0.596214	1
ENSMUSG00000053687	Dpep2	protein_coding	1	1	0.528562	1
ENSMUSG00000053897	Slc39a8	protein_coding	1	1	0.570341	1
ENSMUSG00000054008	Ndst1	protein_coding	1	1	0.511313	1
ENSMUSG00000054619	Mettl7a1	protein_coding	1	1	0.661738	1
ENSMUSG00000054932	Afp	protein_coding	1	1	0.538754	1
ENSMUSG00000055240	Zfp101	protein_coding	1	1	0.542899	1
ENSMUSG00000055296	Tmem245	protein_coding	1	1	0.608871	1
ENSMUSG00000055435	Maf	protein_coding	1	1	0.521953	1
ENSMUSG00000055799	Tcf7l1	protein_coding	1	1	0.559028	1
ENSMUSG00000055839	Tceb2	protein_coding	1	1	0.554435	1
ENSMUSG00000056305	Usp39	protein_coding	1	1	0.598118	1
ENSMUSG00000056515	Rab31	protein_coding	1	1	0.53293	1
ENSMUSG00000056749	Nfil3	protein_coding	1	1	0.564852	1
ENSMUSG00000056973	Ces1d	protein_coding	1	1	0.545587	1
ENSMUSG00000057176	Ccdc189	protein_coding	1	1	0.556116	1
ENSMUSG00000057359	Gm17494	processed_transcript	1	1	0.565188	1
ENSMUSG00000057531	Dtnbp1	protein_coding	1	1	0.519489	1
ENSMUSG00000057778	Cyb5d2	protein_coding	1	1	0.520833	1
ENSMUSG00000058093	Zfp729b	protein_coding	1	1	0.520609	1
ENSMUSG00000058558	Rpl5	protein_coding	1	1	0.536962	1
ENSMUSG00000058715	Fcer1g	protein_coding	1	1	0.600582	1
ENSMUSG00000059325	Hopx	protein_coding	1	1	0.620296	1
ENSMUSG00000059423	Zfp933	protein_coding	1	1	0.536066	1
ENSMUSG00000059498	Fcgr3	protein_coding	1	1	0.586918	1
ENSMUSG00000059772	Slx1b	protein_coding	1	1	0.608535	1
ENSMUSG00000059824	Dbp	protein_coding	1	1	0.563396	1
ENSMUSG00000059851	Suv420h2	protein_coding	1	1	0.510865	1
ENSMUSG00000059981	Taok2	protein_coding	1	1	0.583781	1
ENSMUSG00000060143	Gm10076	protein_coding	1	1	0.568324	1
ENSMUSG00000060509	Xcr1	protein_coding	1	1	0.53349	1
ENSMUSG00000060969	Irx1	protein_coding	1	1	0.595206	1
ENSMUSG00000061100	Retnla	protein_coding	1	1	0.615591	1
ENSMUSG00000061104	Gm10094	protein_coding	1	1	0.570453	1
ENSMUSG00000061119	Prcp	protein_coding	1	1	0.613463	1
ENSMUSG00000061167	Rpl15-ps3	processed_pseudogene	1	1	0.592182	1
ENSMUSG00000061232	H2-K1	protein_coding	1	1	0.566756	1
ENSMUSG00000062078	Qk	protein_coding	1	1	0.624776	1
ENSMUSG00000062081	Gm6055	processed_pseudogene	1	1	0.595318	1
ENSMUSG00000062382	Gm10116	protein_coding	1	1	0.621528	1
ENSMUSG00000062593	Lilrb4a	protein_coding	1	1	0.605287	1
ENSMUSG00000062778	Chia1	protein_coding	1	1	0.570677	1
ENSMUSG00000062933	Gm10123	processed_pseudogene	1	1	0.520833	1
ENSMUSG00000062939	Stat4	protein_coding	1	1	0.578965	1
ENSMUSG00000063458	1700112E06Rik	protein_coding	1	1	0.508289	1
ENSMUSG00000063663	Brwd3	protein_coding	1	1	0.568324	1
ENSMUSG00000063889	Crem	protein_coding	1	1	0.62668	1
ENSMUSG00000063972	Nr6a1	protein_coding	1	1	0.53517	1
ENSMUSG00000064280	Ccdc146	protein_coding	1	1	0.554884	1
ENSMUSG00000064294	Aox3	protein_coding	1	1	0.653226	1
ENSMUSG00000064326	Siva1	protein_coding	1	1	0.583669	1
ENSMUSG00000064341	mt-Nd1	protein_coding	1	1	0.651434	1
ENSMUSG00000064345	mt-Nd2	protein_coding	1	1	0.643593	1
ENSMUSG00000064348	mt-Tn	Mt_tRNA	1	1	0.564068	1
ENSMUSG00000064351	mt-Co1	protein_coding	1	1	0.518593	1
ENSMUSG00000064354	mt-Co2	protein_coding	1	1	0.59095	1
ENSMUSG00000064363	mt-Nd4	protein_coding	1	1	0.525538	1
ENSMUSG00000064368	mt-Nd6	protein_coding	1	1	0.527106	1
ENSMUSG00000064369	mt-Te	Mt_tRNA	1	1	0.550851	1
ENSMUSG00000064372	mt-Tp	Mt_tRNA	1	1	0.56922	1
ENSMUSG00000064702	Gm24950	snRNA	1	1	0.560148	1
ENSMUSG00000064999	Gm26035	misc_RNA	1	1	0.542227	1
ENSMUSG00000065145	Vaultrc5	misc_RNA	1	1	0.541891	1
ENSMUSG00000065208	Gm24616	snoRNA	1	1	0.529794	1
ENSMUSG00000065251	Gm23971	snRNA	1	1	0.560148	1
ENSMUSG00000065259	Snora30	snoRNA	1	1	0.599126	1
ENSMUSG00000065767	Gm23849	snRNA	1	1	0.560148	1
ENSMUSG00000065944	Rnu2-10	snRNA	1	1	0.560148	1
ENSMUSG00000066150	Slc31a1	protein_coding	1	1	0.552979	1
ENSMUSG00000066233	Tmem42	protein_coding	1	1	0.589382	1
ENSMUSG00000066270	Gm10157	processed_pseudogene	1	1	0.59207	1
ENSMUSG00000066357	Wdr6	protein_coding	1	1	0.555668	1
ENSMUSG00000066438	Plekhd1	protein_coding	1	1	0.547715	1
ENSMUSG00000066595	Mfsd7b	protein_coding	1	1	0.550067	1
ENSMUSG00000066809	Gm10180	processed_pseudogene	1	1	0.564404	1
ENSMUSG00000066842	Hmcn1	protein_coding	1	1	0.526882	1
ENSMUSG00000067158	Col4a4	protein_coding	1	1	0.58983	1
ENSMUSG00000067629	Syngap1	protein_coding	1	1	0.547715	1
ENSMUSG00000068874	Selenbp1	protein_coding	1	1	0.65905	1
ENSMUSG00000068877	Selenbp2	protein_coding	1	1	0.562836	1
ENSMUSG00000070436	Serpinh1	protein_coding	1	1	0.626568	1
ENSMUSG00000070544	Top1	protein_coding	1	1	0.5681	1
ENSMUSG00000070691	Runx3	protein_coding	1	1	0.548723	1
ENSMUSG00000070871	Ccnyl1	protein_coding	1	1	0.518929	1
ENSMUSG00000071001	Hrct1	protein_coding	1	1	0.549283	1
ENSMUSG00000071054	Safb	protein_coding	1	1	0.532594	1
ENSMUSG00000071176	Arhgef10	protein_coding	1	1	0.517809	1
ENSMUSG00000071226	Cecr2	protein_coding	1	1	0.564964	1
ENSMUSG00000071230	Npw	protein_coding	1	1	0.59599	1
ENSMUSG00000071267	Zfp942	protein_coding	1	1	0.517921	1
ENSMUSG00000071398	2410004P03Rik	protein_coding	1	1	0.519153	1
ENSMUSG00000071637	Cebpd	protein_coding	1	1	0.600694	1
ENSMUSG00000071660	Ttc9c	protein_coding	1	1	0.553651	1
ENSMUSG00000071713	Csf2rb	protein_coding	1	1	0.572133	1
ENSMUSG00000072692	Rpl37rt	transcribed_processed_pseudogene	1	1	0.549059	1
ENSMUSG00000073147	5031425E22Rik	lincRNA	1	1	0.545363	1
ENSMUSG00000073409	H2-Q6	protein_coding	1	1	0.566756	1
ENSMUSG00000073628	Gm10552	antisense	1	1	0.519713	1
ENSMUSG00000073700	Klhl21	protein_coding	1	1	0.560484	1
ENSMUSG00000073982	Rhog	protein_coding	1	1	0.539763	1
ENSMUSG00000074063	Osgin1	protein_coding	1	1	0.525314	1
ENSMUSG00000074259	Gramd2	protein_coding	1	1	0.548163	1
ENSMUSG00000074280	Gm6166	pseudogene	1	1	0.600134	1
ENSMUSG00000074361	C5ar2	protein_coding	1	1	0.568772	1
ENSMUSG00000074564	Gm10720	protein_coding	1	1	0.534386	1
ENSMUSG00000074794	Arrdc3	protein_coding	1	1	0.514673	1
ENSMUSG00000074800	Gm4149	pseudogene	1	1	0.595878	1
ENSMUSG00000074922	Fam122a	protein_coding	1	1	0.528562	1
ENSMUSG00000075015	Gm10801	protein_coding	1	1	0.595878	1
ENSMUSG00000075284	Wipf1	protein_coding	1	1	0.59823	1
ENSMUSG00000075590	Nrbp2	protein_coding	1	1	0.541891	1
ENSMUSG00000076036	Gm22133	miRNA	1	1	0.544019	1
ENSMUSG00000078134	Gm12355	protein_coding	1	1	0.589382	1
ENSMUSG00000078566	Bnip3	protein_coding	1	1	0.544355	1
ENSMUSG00000078887	Gm6710	protein_coding	1	1	0.502352	1
ENSMUSG00000079465	Col4a3	protein_coding	1	1	0.632953	1
ENSMUSG00000079554	Aox2	protein_coding	1	1	0.534722	1
ENSMUSG00000080859	Rpl10-ps1	transcribed_processed_pseudogene	1	1	0.570228	1
ENSMUSG00000081344	Gm14303	processed_pseudogene	1	1	0.59207	1
ENSMUSG00000083240	Gm13453	processed_pseudogene	1	1	0.571013	1
ENSMUSG00000083705	Gm8624	transcribed_processed_pseudogene	1	1	0.561268	1
ENSMUSG00000083863	Gm13341	unprocessed_pseudogene	1	1	0.581877	1
ENSMUSG00000084817	Gm5526	processed_pseudogene	1	1	0.542227	1
ENSMUSG00000085783	Gm9816	processed_pseudogene	1	1	0.537746	1
ENSMUSG00000086290	Snhg12	lincRNA	1	1	0.521169	1
ENSMUSG00000086350	B230369F24Rik	antisense	1	1	0.513777	1
ENSMUSG00000086370	Ftx	lincRNA	1	1	0.515905	1
ENSMUSG00000086825	Gm15675	lincRNA	1	1	0.519825	1
ENSMUSG00000087412	Gm15501	transcribed_processed_pseudogene	1	1	0.524082	1
ENSMUSG00000087530	Gm15533	antisense	1	1	0.523297	1
ENSMUSG00000089672	Lilr4b	protein_coding	1	1	0.536626	1
ENSMUSG00000089929	Bcl2a1b	protein_coding	1	1	0.576165	1
ENSMUSG00000090213	Tmem189	protein_coding	1	1	0.560708	1
ENSMUSG00000090386	Mir99ahg	processed_transcript	1	1	0.529906	1
ENSMUSG00000090625	Gm20721	protein_coding	1	1	0.539091	1
ENSMUSG00000091017	Fam71a	protein_coding	1	1	0.574037	1
ENSMUSG00000091845	Gm4604	processed_pseudogene	1	1	0.53685	1
ENSMUSG00000091905	Gm6395	pseudogene	1	1	0.518817	1
ENSMUSG00000092329	Gm20388	protein_coding	1	1	0.513329	1
ENSMUSG00000092837	Rpph1	ribozyme	1	1	0.528562	1
ENSMUSG00000093467	Gm20659	antisense	1	1	0.585013	1
ENSMUSG00000093661	Eif4e3	protein_coding	1	1	0.523073	1
ENSMUSG00000093674	Rpl41	protein_coding	1	1	0.561828	1
ENSMUSG00000093815	Gm26444	snRNA	1	1	0.560036	1
ENSMUSG00000094344	Gm11942	processed_pseudogene	1	1	0.540099	1
ENSMUSG00000094392	Gm3788	processed_pseudogene	1	1	0.590278	1
ENSMUSG00000094826	Gm23804	snRNA	1	1	0.560036	1
ENSMUSG00000094955	Gm3699	processed_pseudogene	1	1	0.564404	1
ENSMUSG00000095280	Gm21738	protein_coding	1	1	0.555332	1
ENSMUSG00000095547	Gm10719	protein_coding	1	1	0.536962	1
ENSMUSG00000095595	Fam177a	protein_coding	1	1	0.550179	1
ENSMUSG00000095762	Gm16378	processed_pseudogene	1	1	0.58815	1
ENSMUSG00000095891	Gm10717	protein_coding	1	1	0.62164	1
ENSMUSG00000095969	Rnu1a1	snRNA	1	1	0.560036	1
ENSMUSG00000096006	Gm21596	processed_pseudogene	1	1	0.65289	1
ENSMUSG00000096054	Syne1	protein_coding	1	1	0.536178	1
ENSMUSG00000096201	Gm10715	protein_coding	1	1	0.537298	1
ENSMUSG00000096205	Gm22068	snRNA	1	1	0.560036	1
ENSMUSG00000096206	Gm22317	snRNA	1	1	0.560036	1
ENSMUSG00000096214	Gm22634	snRNA	1	1	0.560036	1
ENSMUSG00000096255	Dynlt1b	protein_coding	1	1	0.520833	1
ENSMUSG00000096349	Gm22513	snRNA	1	1	0.534162	1
ENSMUSG00000096385	Gm11168	protein_coding	1	1	0.539651	1
ENSMUSG00000096472	Cdkn2d	protein_coding	1	1	0.514225	1
ENSMUSG00000096659	Gm25679	snRNA	1	1	0.560036	1
ENSMUSG00000096699	Rps19-ps4	processed_pseudogene	1	1	0.553763	1
ENSMUSG00000096736	Gm17535	protein_coding	1	1	0.552195	1
ENSMUSG00000096755	Gm20746	processed_pseudogene	1	1	0.616935	1
ENSMUSG00000096842	Gm10736	processed_pseudogene	1	1	0.564404	1
ENSMUSG00000096935	1700113A16Rik	antisense	1	1	0.527778	1
ENSMUSG00000096942	Rps19-ps6	processed_pseudogene	1	1	0.600918	1
ENSMUSG00000096944	Gm26722	lincRNA	1	1	0.524306	1
ENSMUSG00000096956	Snhg18	lincRNA	1	1	0.599126	1
ENSMUSG00000096971	4930556M19Rik	lincRNA	1	1	0.596326	1
ENSMUSG00000097148	Gm3839	protein_coding	1	1	0.568436	1
ENSMUSG00000097312	Gm26870	lincRNA	1	1	0.576389	1
ENSMUSG00000097352	C920009B18Rik	transcribed_unprocessed_pseudogene	1	1	0.566532	1
ENSMUSG00000097392	D930016D06Rik	lincRNA	1	1	0.523746	1
ENSMUSG00000097415	AU020206	lincRNA	1	1	0.525202	1
ENSMUSG00000097451	Rian	processed_transcript	1	1	0.617159	1
ENSMUSG00000097507	Gm26538	lincRNA	1	1	0.568212	1
ENSMUSG00000097772	5430416N02Rik	lincRNA	1	1	0.520833	1
ENSMUSG00000098188	Sowahc	protein_coding	1	1	0.606855	1
ENSMUSG00000099021	Rn7s1	misc_RNA	1	1	0.536066	1
ENSMUSG00000099083	Atf7	protein_coding	1	1	0.515009	1
ENSMUSG00000099250	Rn7s2	misc_RNA	1	1	0.536066	1
ENSMUSG00000099974	Bcl2a1d	protein_coding	1	1	0.540659	1
ENSMUSG00000100405	Gm28911	processed_pseudogene	1	1	0.528002	1
ENSMUSG00000101337	Dnah7c	protein_coding	1	1	0.540659	1
ENSMUSG00000101939	Gm28438	unprocessed_pseudogene	1	1	0.630152	1
ENSMUSG00000102037	Bcl2a1a	protein_coding	1	1	0.551523	1
ENSMUSG00000102070	Gm28661	unprocessed_pseudogene	1	1	0.637097	1
ENSMUSG00000102325	Gm37789	TEC	1	1	0.567988	1
ENSMUSG00000102349	Gm37376	TEC	1	1	0.651882	1
ENSMUSG00000102657	Gm37899	TEC	1	1	0.580981	1
ENSMUSG00000102817	Gm6185	unprocessed_pseudogene	1	1	0.55746	1
ENSMUSG00000102856	Gm37084	TEC	1	1	0.530018	1
ENSMUSG00000102973	E430014B02Rik	TEC	1	1	0.596998	1
ENSMUSG00000103220	Gm37728	TEC	1	1	0.552867	1
ENSMUSG00000103630	Gm37242	TEC	1	1	0.50168	1
ENSMUSG00000103646	Gm37706	TEC	1	1	0.574261	1
ENSMUSG00000104211	Gm37985	TEC	1	1	0.521057	1
ENSMUSG00000104291	A130071D04Rik	TEC	1	1	0.535618	1
ENSMUSG00000104503	Gm37738	TEC	1	1	0.53629	1
ENSMUSG00000104802	Gm5869	processed_pseudogene	1	1	0.56138	1
ENSMUSG00000104882	Gm43096	processed_pseudogene	1	1	0.537522	1
ENSMUSG00000105019	Gm43547	TEC	1	1	0.541555	1
ENSMUSG00000105247	Gm42519	TEC	1	1	0.544131	1
ENSMUSG00000105287	Gm43577	sense_intronic	1	1	0.529458	1
ENSMUSG00000105304	Gm43696	sense_intronic	1	1	0.529346	1
ENSMUSG00000105601	Gm42725	TEC	1	1	0.592406	1
ENSMUSG00000105748	Gm43088	TEC	1	1	0.52789	1
ENSMUSG00000105909	Gm43189	sense_intronic	1	1	0.508177	1
ENSMUSG00000106375	Gm43361	TEC	1	1	0.570789	1
ENSMUSG00000106443	Gm42702	sense_intronic	1	1	0.561492	1
ENSMUSG00000106957	Gm43085	TEC	1	1	0.647401	1
ENSMUSG00000107041	Gm42735	TEC	1	1	0.540099	1
ENSMUSG00000107336	Gm43461	TEC	1	1	0.544467	1
ENSMUSG00000107722	2900060B14Rik	antisense	1	1	0.527106	1
ENSMUSG00000108353	Gm45205	TEC	1	1	0.585461	1
ENSMUSG00000108368	Gm45053	TEC	1	1	0.523858	1
ENSMUSG00000108414	Snhg1	processed_transcript	1	1	0.536066	1
ENSMUSG00000108443	Gm44510	TEC	1	1	0.518369	1
ENSMUSG00000108500	Gm45033	TEC	1	1	0.509521	1
ENSMUSG00000108533	Gm44792	TEC	1	1	0.518481	1
ENSMUSG00000109119	Gm44752	antisense	1	1	0.526098	1
ENSMUSG00000109244	Gm44751	lincRNA	1	1	0.555892	1
ENSMUSG00000109279	Gm45220	TEC	1	1	0.510193	1
ENSMUSG00000109357	Gm45236	TEC	1	1	0.622872	1
ENSMUSG00000109739	RP24-116C19.5	protein_coding	1	1	0.588262	1
ENSMUSG00000030866	Ern2	protein_coding	2	2.47856e-21	0.977137	2.71522e-20
ENSMUSG00000028356	Ambp	protein_coding	2	2.7618e-20	0.966489	3.43217e-19
ENSMUSG00000024028	Tff2	protein_coding	2	3.41884e-20	0.995615	4.10032e-19
ENSMUSG00000024032	Tff1	protein_coding	2	4.74626e-20	0.994049	5.76024e-19
ENSMUSG00000032226	Gcnt3	protein_coding	2	5.96313e-20	0.980896	7.35791e-19
ENSMUSG00000013643	Lypd8	protein_coding	2	8.31452e-20	0.987473	1.02228e-18
ENSMUSG00000035780	Ugt2a3	protein_coding	2	1.09787e-19	0.964923	1.32219e-18
ENSMUSG00000055114	Anxa13	protein_coding	2	1.09787e-19	0.964923	1.33042e-18
ENSMUSG00000029260	Ugt2b34	protein_coding	2	1.47758e-19	0.980739	1.63033e-18
ENSMUSG00000031635	Anxa10	protein_coding	2	1.81165e-19	0.994989	1.42831e-18
ENSMUSG00000040600	Eps8l3	protein_coding	2	3.09906e-19	0.96461	3.60696e-18
ENSMUSG00000026065	Slc9a4	protein_coding	2	4.29912e-19	0.983401	5.19025e-18
ENSMUSG00000029273	Sult1d1	protein_coding	2	4.57965e-19	0.958346	5.41903e-18
ENSMUSG00000027225	Duoxa2	protein_coding	2	5.12424e-19	0.974789	6.1801e-18
ENSMUSG00000030050	Gkn1	protein_coding	2	8.443e-19	0.959912	9.61258e-18
ENSMUSG00000031877	Ces2g	protein_coding	2	9.42186e-19	0.963671	1.13294e-17
ENSMUSG00000027801	Tm4sf4	protein_coding	2	1.17342e-18	0.982148	1.32016e-17
ENSMUSG00000024029	Tff3	protein_coding	2	1.53302e-18	0.957094	1.72111e-17
ENSMUSG00000029154	Cwh43	protein_coding	2	2.22723e-18	0.963671	2.65111e-17
ENSMUSG00000004552	Ctse	protein_coding	2	2.86947e-18	0.984654	1.80418e-17
ENSMUSG00000035775	Krt20	protein_coding	2	3.2927e-18	0.949107	3.74623e-17
ENSMUSG00000022226	Mcpt2	protein_coding	2	4.1008e-18	0.934231	4.85458e-17
ENSMUSG00000068452	Duox2	protein_coding	2	4.5818e-18	0.947541	5.17458e-17
ENSMUSG00000032454	Rbp2	protein_coding	2	4.5818e-18	0.947541	5.40754e-17
ENSMUSG00000073408	Dpcr1	protein_coding	2	6.72751e-18	0.969778	5.35639e-17
ENSMUSG00000053964	Lgals4	protein_coding	2	1.0601e-17	0.99906	1.21122e-16
ENSMUSG00000031613	Hpgd	protein_coding	2	1.54967e-17	0.918259	1.79208e-16
ENSMUSG00000079339	Ifit1bl1	protein_coding	2	1.69769e-17	0.927654	1.97606e-16
ENSMUSG00000024899	Papss2	protein_coding	2	1.91802e-17	0.968055	2.13273e-16
ENSMUSG00000046804	Phgr1	protein_coding	2	4.23738e-17	0.963984	2.99896e-16
ENSMUSG00000023122	Sult1c2	protein_coding	2	4.85464e-17	0.993423	4.56955e-17
ENSMUSG00000043461	Sptssb	protein_coding	2	7.23744e-17	0.985907	8.35443e-16
ENSMUSG00000078672	Mup20	protein_coding	2	7.51453e-17	0.91591	8.62582e-16
ENSMUSG00000000544	Gpa33	protein_coding	2	1.18776e-16	0.903852	1.34058e-15
ENSMUSG00000045991	Onecut2	protein_coding	2	1.81934e-16	0.975258	1.719e-15
ENSMUSG00000052131	Akr1b7	protein_coding	2	1.85141e-16	0.941748	2.0474e-15
ENSMUSG00000022755	Adgrg7	protein_coding	2	2.91426e-16	0.914187	3.24199e-15
ENSMUSG00000033213	AA467197	protein_coding	2	3.42118e-16	0.92233	2.853e-15
ENSMUSG00000061825	Ces2c	protein_coding	2	3.55795e-16	0.88835	3.81999e-15
ENSMUSG00000031906	Smpd3	protein_coding	2	3.66432e-16	0.952709	3.65959e-15
ENSMUSG00000030049	Gkn2	protein_coding	2	4.37542e-16	0.941121	3.37472e-15
ENSMUSG00000029269	Sult1b1	protein_coding	2	4.53406e-16	0.902599	5.10263e-15
ENSMUSG00000035165	Kcne3	protein_coding	2	8.12898e-16	0.930316	8.83906e-15
ENSMUSG00000022040	Ephx2	protein_coding	2	8.21563e-16	0.899781	9.17867e-15
ENSMUSG00000026062	Slc9a2	protein_coding	2	1.14092e-15	0.898215	1.26939e-14
ENSMUSG00000031775	Pllp	protein_coding	2	1.43306e-15	0.910899	1.44047e-14
ENSMUSG00000074179	Gm10639	protein_coding	2	2.65314e-15	0.957563	5.83495e-15
ENSMUSG00000041737	Tmem45b	protein_coding	2	3.75448e-15	0.949734	1.349e-14
ENSMUSG00000067231	Cyp2c65	protein_coding	2	3.90301e-15	0.901503	4.28592e-14
ENSMUSG00000024730	Ms4a8a	protein_coding	2	4.77326e-15	0.938929	4.28873e-14
ENSMUSG00000074183	Gsta1	protein_coding	2	4.91261e-15	0.978703	3.78212e-15
ENSMUSG00000027792	Bche	protein_coding	2	5.73385e-15	0.895083	6.14222e-14
ENSMUSG00000027224	Duoxa1	protein_coding	2	5.79422e-15	0.859067	5.54204e-14
ENSMUSG00000047517	Dmbt1	protein_coding	2	1.3451e-14	0.970561	5.73722e-14
ENSMUSG00000018862	Otop3	protein_coding	2	1.51297e-14	0.870968	1.6129e-13
ENSMUSG00000040605	Bace2	protein_coding	2	2.31969e-14	0.950673	1.60094e-14
ENSMUSG00000029322	Plac8	protein_coding	2	2.36106e-14	0.980583	1.04787e-15
ENSMUSG00000078439	Smim24	protein_coding	2	3.7952e-14	0.866583	3.33128e-13
ENSMUSG00000074604	Mgst2	protein_coding	2	3.96472e-14	0.947541	3.09726e-13
ENSMUSG00000043501	Lgals2	protein_coding	2	9.2856e-14	0.86721	9.77838e-13
ENSMUSG00000029727	Cyp3a13	protein_coding	2	1.19858e-13	0.968681	7.57111e-13
ENSMUSG00000020581	Agr2	protein_coding	2	1.22329e-13	0.927028	8.16572e-13
ENSMUSG00000022938	Fam3b	protein_coding	2	1.27999e-13	0.855622	1.3253e-12
ENSMUSG00000074300	BC030870	protein_coding	2	1.5561e-13	0.854682	1.3936e-12
ENSMUSG00000061808	Ttr	protein_coding	2	2.64339e-13	0.86674	2.73187e-12
ENSMUSG00000037145	2210407C18Rik	protein_coding	2	3.85826e-13	0.95772	1.32965e-13
ENSMUSG00000034107	Ano7	protein_coding	2	5.3619e-13	0.872064	5.52359e-12
ENSMUSG00000040703	Cyp2s1	protein_coding	2	6.08068e-13	0.911682	3.41685e-12
ENSMUSG00000043668	Tox3	protein_coding	2	6.75085e-13	0.883182	6.85403e-12
ENSMUSG00000095026	Gm3336	protein_coding	2	7.65174e-13	0.929847	7.61302e-12
ENSMUSG00000036098	Myrf	protein_coding	2	1.0958e-12	0.939242	2.41295e-12
ENSMUSG00000037440	Vnn1	protein_coding	2	1.21071e-12	0.938616	5.88492e-12
ENSMUSG00000022219	Cideb	protein_coding	2	2.00859e-12	0.877231	1.79819e-11
ENSMUSG00000049128	Ivl	protein_coding	2	2.11788e-12	0.836831	2.11601e-11
ENSMUSG00000047730	Fcgbp	protein_coding	2	2.2613e-12	0.918102	2.28961e-11
ENSMUSG00000046402	Rbp1	protein_coding	2	2.39669e-12	0.88005	2.39345e-11
ENSMUSG00000026417	Pigr	protein_coding	2	2.52162e-12	0.979643	2.39151e-17
ENSMUSG00000021456	Fbp2	protein_coding	2	1.08522e-11	0.888506	6.17014e-11
ENSMUSG00000098207	Arl14	protein_coding	2	1.23375e-11	0.855308	5.94209e-11
ENSMUSG00000025401	Myo1a	protein_coding	2	1.25832e-11	0.846696	1.23787e-10
ENSMUSG00000047907	Tshz2	protein_coding	2	1.37457e-11	0.822424	1.33245e-10
ENSMUSG00000067229	Cyp2c66	protein_coding	2	1.87906e-11	0.81021	1.71682e-10
ENSMUSG00000026764	Kif5c	protein_coding	2	1.93496e-11	0.839962	1.81683e-10
ENSMUSG00000027761	Aadac	protein_coding	2	2.35921e-11	0.870655	1.37465e-10
ENSMUSG00000032348	Gsta4	protein_coding	2	4.79777e-11	0.963984	5.68179e-14
ENSMUSG00000028415	Spink4	protein_coding	2	5.51358e-11	0.869089	1.04775e-10
ENSMUSG00000041827	Oasl1	protein_coding	2	5.96031e-11	0.909176	1.44226e-11
ENSMUSG00000086706	Gm15848	antisense	2	6.36308e-11	0.82446	3.79155e-10
ENSMUSG00000049577	Zfpm1	protein_coding	2	6.99165e-11	0.857188	4.86614e-10
ENSMUSG00000031430	Vsig1	protein_coding	2	1.08069e-10	0.847166	8.2231e-10
ENSMUSG00000026175	Vil1	protein_coding	2	1.10326e-10	0.861572	5.38429e-10
ENSMUSG00000032584	Mst1r	protein_coding	2	1.29145e-10	0.860633	5.31185e-10
ENSMUSG00000061531	Tmem236	protein_coding	2	1.59352e-10	0.819605	1.48014e-09
ENSMUSG00000022227	Mcpt1	protein_coding	2	1.88231e-10	0.793454	1.65563e-09
ENSMUSG00000022598	Psca	protein_coding	2	2.03438e-10	0.936423	7.53742e-10
ENSMUSG00000037031	Tspan15	protein_coding	2	2.29821e-10	0.931412	2.00846e-09
ENSMUSG00000051177	Plcb1	protein_coding	2	2.34566e-10	0.830723	2.2013e-09
ENSMUSG00000020609	Apob	protein_coding	2	3.13544e-10	0.886784	2.48675e-10
ENSMUSG00000028073	Pear1	protein_coding	2	3.70559e-10	0.836204	7.09661e-10
ENSMUSG00000073678	Pgap1	protein_coding	2	3.82522e-10	0.906358	4.80068e-10
ENSMUSG00000054161	Fam83e	protein_coding	2	4.07194e-10	0.839493	3.74704e-09
ENSMUSG00000026473	Glul	protein_coding	2	4.50252e-10	0.93705	3.20737e-09
ENSMUSG00000030688	Stard10	protein_coding	2	7.65586e-10	0.903226	1.67025e-09
ENSMUSG00000020607	Fam84a	protein_coding	2	1.1987e-09	0.850298	4.37471e-09
ENSMUSG00000028716	Pdzk1ip1	protein_coding	2	1.25882e-09	0.92922	2.03992e-10
ENSMUSG00000047797	Gjb1	protein_coding	2	1.27771e-09	0.861885	3.94113e-10
ENSMUSG00000041605	5730559C18Rik	protein_coding	2	1.51064e-09	0.903226	3.23931e-11
ENSMUSG00000028255	Clca1	protein_coding	2	1.59106e-09	0.787974	1.42834e-08
ENSMUSG00000027188	Pamr1	protein_coding	2	1.74323e-09	0.847949	7.47696e-09
ENSMUSG00000025467	Prap1	protein_coding	2	1.87096e-09	0.765111	1.40758e-08
ENSMUSG00000000308	Ckmt1	protein_coding	2	1.95735e-09	0.899781	1.75741e-08
ENSMUSG00000090035	Galnt4	protein_coding	2	2.22656e-09	0.87363	1.01083e-08
ENSMUSG00000027356	Fermt1	protein_coding	2	3.00406e-09	0.880363	1.26126e-11
ENSMUSG00000032091	Tmprss4	protein_coding	2	3.31734e-09	0.866113	2.75986e-08
ENSMUSG00000019775	Rgs17	protein_coding	2	3.63337e-09	0.810993	3.14895e-08
ENSMUSG00000025934	Gsta3	protein_coding	2	3.99996e-09	0.90902	1.59677e-09
ENSMUSG00000020099	Unc5b	protein_coding	2	4.57137e-09	0.856248	3.57033e-08
ENSMUSG00000022754	Tmem45a	protein_coding	2	5.12421e-09	0.820702	3.84556e-08
ENSMUSG00000064254	Ethe1	protein_coding	2	5.58744e-09	0.875979	1.27657e-08
ENSMUSG00000029153	Ociad2	protein_coding	2	5.81554e-09	0.908237	2.31282e-08
ENSMUSG00000039217	Il18	protein_coding	2	6.96212e-09	0.874413	4.16241e-09
ENSMUSG00000017950	Hnf4a	protein_coding	2	7.51518e-09	0.806765	5.06286e-08
ENSMUSG00000042303	Sgsm3	protein_coding	2	9.11692e-09	0.827748	3.94478e-08
ENSMUSG00000086968	4933431E20Rik	antisense	2	1.25943e-08	0.835265	1.02166e-07
ENSMUSG00000021208	Ifi27l2b	protein_coding	2	1.45491e-08	0.828061	1.13906e-08
ENSMUSG00000032066	Bco2	protein_coding	2	1.49201e-08	0.780927	1.19131e-07
ENSMUSG00000028786	Tmem54	protein_coding	2	1.63412e-08	0.879267	1.54976e-08
ENSMUSG00000064899	Snord118	snoRNA	2	2.01221e-08	0.906044	1.51784e-07
ENSMUSG00000034634	Ly6d	protein_coding	2	2.17481e-08	0.90855	1.25004e-13
ENSMUSG00000000385	Tmprss2	protein_coding	2	2.87339e-08	0.897588	1.81389e-07
ENSMUSG00000052914	Cyp2j6	protein_coding	2	2.89932e-08	0.853429	7.40943e-09
ENSMUSG00000021749	Oit1	protein_coding	2	3.22984e-08	0.822894	1.72323e-07
ENSMUSG00000030616	Sytl2	protein_coding	2	3.33512e-08	0.856874	1.26054e-07
ENSMUSG00000021556	Golm1	protein_coding	2	3.41363e-08	0.910742	2.90864e-07
ENSMUSG00000031608	Galnt7	protein_coding	2	3.49273e-08	0.879737	2.56574e-07
ENSMUSG00000021213	Akr1c13	protein_coding	2	3.5928e-08	0.818979	2.8834e-07
ENSMUSG00000003161	Sri	protein_coding	2	3.73225e-08	0.909176	1.14809e-08
ENSMUSG00000031725	Ces1f	protein_coding	2	4.12358e-08	0.779831	3.42916e-07
ENSMUSG00000027562	Car2	protein_coding	2	4.46348e-08	0.909176	7.64696e-13
ENSMUSG00000051727	Kctd14	protein_coding	2	4.57205e-08	0.864547	3.36389e-07
ENSMUSG00000044042	Fmn1	protein_coding	2	4.73047e-08	0.820388	3.33235e-07
ENSMUSG00000020865	Abcc3	protein_coding	2	5.24942e-08	0.894457	2.82674e-08
ENSMUSG00000055730	Ces2a	protein_coding	2	5.35549e-08	0.759161	4.46868e-07
ENSMUSG00000030413	Pglyrp1	protein_coding	2	6.28227e-08	0.900877	5.32718e-09
ENSMUSG00000038668	Lpar1	protein_coding	2	7.11209e-08	0.776699	3.12179e-07
ENSMUSG00000037860	Aim2	protein_coding	2	7.27447e-08	0.780927	6.14347e-07
ENSMUSG00000029470	P2rx4	protein_coding	2	9.17975e-08	0.885374	1.52559e-07
ENSMUSG00000031169	Porcn	protein_coding	2	1.06157e-07	0.808644	8.17046e-07
ENSMUSG00000028378	Ptgr1	protein_coding	2	1.38154e-07	0.888819	1.04493e-06
ENSMUSG00000031168	Ebp	protein_coding	2	1.48624e-07	0.845913	6.04555e-07
ENSMUSG00000005803	Sqrdl	protein_coding	2	1.72525e-07	0.857971	6.02285e-07
ENSMUSG00000028680	Plk3	protein_coding	2	1.89446e-07	0.871751	1.85025e-10
ENSMUSG00000075010	AW112010	lincRNA	2	1.95952e-07	0.878171	4.37794e-08
ENSMUSG00000038732	Mboat1	protein_coding	2	2.09332e-07	0.876605	4.2699e-11
ENSMUSG00000042428	Mgat3	protein_coding	2	2.34091e-07	0.796743	1.65308e-06
ENSMUSG00000057092	Fxyd3	protein_coding	2	3.49946e-07	0.88099	2.79897e-14
ENSMUSG00000088252	Snord13	snoRNA	2	3.52024e-07	0.890072	2.72762e-06
ENSMUSG00000040613	Apobec1	protein_coding	2	3.54737e-07	0.743815	2.83479e-06
ENSMUSG00000032899	Styk1	protein_coding	2	3.70738e-07	0.841059	4.55712e-08
ENSMUSG00000015882	Lcorl	protein_coding	2	3.8114e-07	0.854995	3.09954e-06
ENSMUSG00000022037	Clu	protein_coding	2	3.9191e-07	0.892264	6.3175e-17
ENSMUSG00000048992	Prss32	protein_coding	2	5.42469e-07	0.746477	4.06749e-06
ENSMUSG00000105528	Gm43519	TEC	2	5.59296e-07	0.864078	8.19861e-09
ENSMUSG00000030471	Zdhhc13	protein_coding	2	5.62021e-07	0.82493	1.97951e-07
ENSMUSG00000040473	Cfap69	protein_coding	2	5.79091e-07	0.803476	4.35764e-06
ENSMUSG00000028434	Epb41l4b	protein_coding	2	6.73887e-07	0.838396	9.47495e-07
ENSMUSG00000033577	Myo6	protein_coding	2	6.87952e-07	0.882556	2.92555e-10
ENSMUSG00000034738	Nostrin	protein_coding	2	6.97937e-07	0.78954	5.59412e-06
ENSMUSG00000041236	Vps41	protein_coding	2	7.53884e-07	0.855308	2.14491e-06
ENSMUSG00000027227	Sord	protein_coding	2	7.69693e-07	0.827122	3.08686e-07
ENSMUSG00000050097	Ces2b	protein_coding	2	7.95711e-07	0.766521	6.1353e-06
ENSMUSG00000032369	Plscr1	protein_coding	2	8.51167e-07	0.871124	6.79739e-09
ENSMUSG00000015766	Eps8	protein_coding	2	8.77923e-07	0.875039	1.45643e-12
ENSMUSG00000025432	Avil	protein_coding	2	8.93009e-07	0.743658	4.74832e-06
ENSMUSG00000013338	Fer1l4	protein_coding	2	9.68901e-07	0.776856	9.88671e-07
ENSMUSG00000027375	Mal	protein_coding	2	1.04381e-06	0.878484	5.07684e-09
ENSMUSG00000003051	Elf3	protein_coding	2	1.11123e-06	0.880676	3.8538e-13
ENSMUSG00000025498	Irf7	protein_coding	2	1.19332e-06	0.819292	5.36247e-06
ENSMUSG00000020105	Lrig3	protein_coding	2	1.21799e-06	0.759787	8.52772e-06
ENSMUSG00000078945	Naip2	protein_coding	2	1.42734e-06	0.800031	1.8494e-06
ENSMUSG00000020937	Plcd3	protein_coding	2	1.44777e-06	0.797056	2.18793e-06
ENSMUSG00000038515	Grtp1	protein_coding	2	1.45398e-06	0.802693	1.10517e-05
ENSMUSG00000026519	Tmem63a	protein_coding	2	1.49138e-06	0.830254	2.02697e-06
ENSMUSG00000028699	Tspan1	protein_coding	2	1.80602e-06	0.86533	3.72758e-06
ENSMUSG00000041782	Lad1	protein_coding	2	1.83799e-06	0.854056	1.71654e-08
ENSMUSG00000032265	Fam46a	protein_coding	2	1.84671e-06	0.824616	7.11689e-06
ENSMUSG00000062116	Zfp954	protein_coding	2	2.06338e-06	0.76057	1.2731e-05
ENSMUSG00000099227	Mir8114	miRNA	2	2.16273e-06	0.778578	1.46812e-05
ENSMUSG00000068011	Mkrn2os	protein_coding	2	2.28768e-06	0.799405	2.34526e-06
ENSMUSG00000022683	Pla2g10	protein_coding	2	2.36193e-06	0.742718	1.81336e-05
ENSMUSG00000018919	Tm4sf5	protein_coding	2	2.37942e-06	0.78124	4.14846e-06
ENSMUSG00000031844	Hsd17b2	protein_coding	2	2.64216e-06	0.759004	4.76896e-06
ENSMUSG00000031097	Tnni2	protein_coding	2	2.69505e-06	0.766521	3.05526e-06
ENSMUSG00000034607	Pof1b	protein_coding	2	2.83981e-06	0.85249	1.2002e-06
ENSMUSG00000001604	Tcea3	protein_coding	2	2.8453e-06	0.830567	5.28124e-06
ENSMUSG00000039529	Atp8b1	protein_coding	2	3.16666e-06	0.854526	9.59747e-07
ENSMUSG00000105263	Gm42427	TEC	2	3.24951e-06	0.846852	2.09072e-09
ENSMUSG00000049922	Slc35c1	protein_coding	2	3.25644e-06	0.791262	7.12249e-06
ENSMUSG00000103711	Tstd1	protein_coding	2	3.26098e-06	0.816004	5.73812e-09
ENSMUSG00000040412	5330417C22Rik	protein_coding	2	3.38603e-06	0.804259	2.24514e-05
ENSMUSG00000032420	Nt5e	protein_coding	2	3.57221e-06	0.83041	1.48777e-05
ENSMUSG00000049493	Pls1	protein_coding	2	3.89752e-06	0.845287	1.80656e-05
ENSMUSG00000029086	Prom1	protein_coding	2	3.99029e-06	0.863764	8.99743e-16
ENSMUSG00000030747	Dgat2	protein_coding	2	4.03104e-06	0.805355	1.38485e-05
ENSMUSG00000050199	Lgr4	protein_coding	2	4.07286e-06	0.84607	1.18397e-06
ENSMUSG00000023909	Paqr4	protein_coding	2	4.13317e-06	0.767303	1.22927e-05
ENSMUSG00000048489	8430408G22Rik	protein_coding	2	4.16645e-06	0.835421	1.246e-05
ENSMUSG00000027800	Tm4sf1	protein_coding	2	4.28508e-06	0.823677	3.15588e-05
ENSMUSG00000026688	Mgst3	protein_coding	2	4.34626e-06	0.865957	1.31293e-09
ENSMUSG00000027456	Sdcbp2	protein_coding	2	4.69159e-06	0.856091	2.21951e-12
ENSMUSG00000034435	Tmem30b	protein_coding	2	5.02001e-06	0.820545	1.41638e-05
ENSMUSG00000039997	Ifi203	protein_coding	2	6.01034e-06	0.836517	2.3848e-07
ENSMUSG00000021263	Degs2	protein_coding	2	6.16147e-06	0.837614	2.80107e-10
ENSMUSG00000044912	Syt16	protein_coding	2	6.25196e-06	0.717664	3.90714e-05
ENSMUSG00000094651	Gal3st2	protein_coding	2	6.25196e-06	0.717664	3.90714e-05
ENSMUSG00000030587	2200002D01Rik	protein_coding	2	6.73155e-06	0.865644	1.17926e-06
ENSMUSG00000001123	Lgals9	protein_coding	2	7.1611e-06	0.856248	9.09286e-06
ENSMUSG00000023043	Krt18	protein_coding	2	7.96399e-06	0.864704	3.37041e-14
ENSMUSG00000038372	Gmds	protein_coding	2	8.93074e-06	0.808018	9.04537e-06
ENSMUSG00000040525	Cblc	protein_coding	2	9.20753e-06	0.828688	5.43716e-05
ENSMUSG00000020774	Aspa	protein_coding	2	9.84197e-06	0.746633	7.35543e-05
ENSMUSG00000030650	Tmc5	protein_coding	2	9.84482e-06	0.807235	1.27055e-06
ENSMUSG00000033208	S100b	protein_coding	2	1.06787e-05	0.742092	7.16794e-05
ENSMUSG00000025019	Lcor	protein_coding	2	1.12511e-05	0.826965	2.7418e-06
ENSMUSG00000033880	Lgals3bp	protein_coding	2	1.20135e-05	0.854526	4.89933e-05
ENSMUSG00000038415	Foxq1	protein_coding	2	1.25698e-05	0.82305	8.15034e-05
ENSMUSG00000032477	Cdc25a	protein_coding	2	1.33096e-05	0.780927	6.52599e-05
ENSMUSG00000107992	Gm44223	unprocessed_pseudogene	2	1.44819e-05	0.744128	9.80641e-06
ENSMUSG00000044393	Dsg2	protein_coding	2	1.46554e-05	0.851237	1.10887e-10
ENSMUSG00000087008	Gm5530	processed_pseudogene	2	1.49073e-05	0.787974	1.60217e-05
ENSMUSG00000006777	Krt23	protein_coding	2	1.55005e-05	0.837457	0.000113779
ENSMUSG00000038459	Abhd17c	protein_coding	2	1.59836e-05	0.843407	9.29878e-05
ENSMUSG00000090272	Mndal	protein_coding	2	1.61545e-05	0.812715	1.30699e-05
ENSMUSG00000026278	Bok	protein_coding	2	1.63732e-05	0.807078	6.78637e-06
ENSMUSG00000067006	Serpinb5	protein_coding	2	1.67301e-05	0.82493	2.41605e-07
ENSMUSG00000020846	Fam101b	protein_coding	2	1.71664e-05	0.757595	0.000106797
ENSMUSG00000020263	Appl2	protein_coding	2	1.83075e-05	0.822737	0.000133606
ENSMUSG00000020841	Cpd	protein_coding	2	1.85733e-05	0.834795	0.000117361
ENSMUSG00000019872	Smpdl3a	protein_coding	2	1.9463e-05	0.839962	4.86596e-05
ENSMUSG00000044162	Tnip3	protein_coding	2	1.98804e-05	0.840589	3.45947e-13
ENSMUSG00000021280	Exoc3l4	protein_coding	2	2.05161e-05	0.782963	2.533e-05
ENSMUSG00000034926	Dhcr24	protein_coding	2	2.05927e-05	0.785468	9.54358e-05
ENSMUSG00000021640	Naip1	protein_coding	2	2.15896e-05	0.724867	0.00012385
ENSMUSG00000009585	Apobec3	protein_coding	2	2.24166e-05	0.85296	1.2486e-05
ENSMUSG00000021594	Srd5a1	protein_coding	2	2.44922e-05	0.728469	3.31575e-05
ENSMUSG00000024511	Rab27b	protein_coding	2	2.46013e-05	0.807391	7.12513e-05
ENSMUSG00000034586	Hid1	protein_coding	2	2.61926e-05	0.767303	0.00016582
ENSMUSG00000021676	Iqgap2	protein_coding	2	2.6992e-05	0.824616	1.79088e-05
ENSMUSG00000087431	Gm16054	antisense	2	2.71917e-05	0.714219	0.000183338
ENSMUSG00000025575	Cant1	protein_coding	2	2.77412e-05	0.796743	0.000157651
ENSMUSG00000032473	Cldn18	protein_coding	2	2.82846e-05	0.85249	2.48591e-08
ENSMUSG00000045518	Onecut3	protein_coding	2	3.35328e-05	0.708111	0.000240339
ENSMUSG00000078942	Naip6	protein_coding	2	3.42794e-05	0.75274	1.54354e-05
ENSMUSG00000047117	Ankdd1b	protein_coding	2	3.56075e-05	0.741935	3.83453e-05
ENSMUSG00000020777	Acox1	protein_coding	2	3.6537e-05	0.847792	2.30897e-06
ENSMUSG00000075420	Smim6	protein_coding	2	3.72257e-05	0.825243	0.000241418
ENSMUSG00000032278	Paqr5	protein_coding	2	3.90758e-05	0.82994	1.4435e-08
ENSMUSG00000079620	Muc4	protein_coding	2	3.93133e-05	0.841842	1.12375e-07
ENSMUSG00000071203	Naip5	protein_coding	2	3.97154e-05	0.787347	4.6751e-05
ENSMUSG00000003546	Klc4	protein_coding	2	3.97154e-05	0.787347	0.000159677
ENSMUSG00000038039	Gcc2	protein_coding	2	4.02313e-05	0.840589	0.00029388
ENSMUSG00000021950	Anxa8	protein_coding	2	4.07215e-05	0.822111	1.47036e-08
ENSMUSG00000063727	Tnfrsf11b	protein_coding	2	4.12549e-05	0.733323	0.000218189
ENSMUSG00000026765	Lypd6b	protein_coding	2	4.60046e-05	0.781553	8.07804e-05
ENSMUSG00000069045	Ddx3y	protein_coding	2	4.78077e-05	0.790166	1.20891e-05
ENSMUSG00000085395	Gm13056	lincRNA	2	4.87471e-05	0.756655	0.000141847
ENSMUSG00000026303	Mlph	protein_coding	2	5.19967e-05	0.82994	3.04664e-05
ENSMUSG00000055976	Cldn23	protein_coding	2	5.21631e-05	0.817413	7.1917e-09
ENSMUSG00000097667	Gm26764	lincRNA	2	5.45887e-05	0.841215	1.21248e-05
ENSMUSG00000039621	Prex1	protein_coding	2	5.50932e-05	0.746007	0.000380799
ENSMUSG00000054499	Dedd2	protein_coding	2	8.31468e-05	0.795177	0.000435094
ENSMUSG00000031790	Mmp15	protein_coding	2	9.22505e-05	0.802537	0.000601911
ENSMUSG00000001025	S100a6	protein_coding	2	9.25671e-05	0.840902	1.01836e-07
ENSMUSG00000015405	Ace2	protein_coding	2	9.40715e-05	0.751801	0.0006642
ENSMUSG00000019762	Iyd	protein_coding	2	0.000110489	0.730504	0.00046802
ENSMUSG00000031379	Pir	protein_coding	2	0.000110878	0.785155	0.000768551
ENSMUSG00000066800	Rnasel	protein_coding	2	0.000110938	0.776699	8.6708e-05
ENSMUSG00000025068	Gsto1	protein_coding	2	0.000111835	0.83777	2.86452e-14
ENSMUSG00000023915	Tnfrsf21	protein_coding	2	0.000113282	0.813811	8.36325e-05
ENSMUSG00000042510	AA986860	protein_coding	2	0.000114303	0.81021	4.46975e-05
ENSMUSG00000058064	Gm10036	protein_coding	2	0.00011718	0.827278	3.97423e-06
ENSMUSG00000053898	Ech1	protein_coding	2	0.000129177	0.824303	7.03262e-05
ENSMUSG00000028463	Car9	protein_coding	2	0.000132991	0.779518	0.000137641
ENSMUSG00000044734	Serpinb1a	protein_coding	2	0.000157401	0.805982	4.72868e-06
ENSMUSG00000046727	Cystm1	protein_coding	2	0.000160947	0.834951	2.17042e-06
ENSMUSG00000091659	Gm17099	antisense	2	0.00017665	0.693392	0.000924251
ENSMUSG00000039131	Gipc2	protein_coding	2	0.000202085	0.811463	6.37069e-06
ENSMUSG00000001943	Vsig2	protein_coding	2	0.000203788	0.818353	3.44645e-08
ENSMUSG00000040722	Scamp5	protein_coding	2	0.000223676	0.751018	1.18367e-05
ENSMUSG00000085498	Gm14023	processed_transcript	2	0.000226369	0.807235	9.22098e-10
ENSMUSG00000037921	Ddx60	protein_coding	2	0.000240607	0.728625	0.00137909
ENSMUSG00000029772	Ahcyl2	protein_coding	2	0.000246342	0.816474	0.00149751
ENSMUSG00000096929	A330023F24Rik	processed_transcript	2	0.00026475	0.781397	0.00122101
ENSMUSG00000033781	Asb13	protein_coding	2	0.000270028	0.752271	0.00160318
ENSMUSG00000042784	Muc1	protein_coding	2	0.000280693	0.829314	4.26116e-05
ENSMUSG00000051375	Pcdh1	protein_coding	2	0.000304181	0.733636	0.000275485
ENSMUSG00000050965	Prkca	protein_coding	2	0.000308757	0.753837	0.00207442
ENSMUSG00000024331	Dsc2	protein_coding	2	0.0003171	0.739587	0.000873896
ENSMUSG00000021285	Ppp1r13b	protein_coding	2	0.000323682	0.781397	0.000972277
ENSMUSG00000029994	Anxa4	protein_coding	2	0.000339565	0.827435	7.27157e-05
ENSMUSG00000041351	Rap1gap	protein_coding	2	0.000352838	0.791732	0.00134695
ENSMUSG00000020577	Tspan13	protein_coding	2	0.000357671	0.766834	0.0023668
ENSMUSG00000053886	Sh2d4a	protein_coding	2	0.000358768	0.812715	0.00138005
ENSMUSG00000039364	Sectm1b	protein_coding	2	0.000359512	0.714845	0.00238366
ENSMUSG00000074227	Spint2	protein_coding	2	0.000381213	0.825869	9.2941e-09
ENSMUSG00000025921	Rdh10	protein_coding	2	0.000384312	0.814125	3.22362e-06
ENSMUSG00000060512	0610040J01Rik	protein_coding	2	0.000420612	0.785625	0.00236231
ENSMUSG00000026961	Lrrc26	protein_coding	2	0.000427288	0.783902	7.67351e-07
ENSMUSG00000024055	Cyp4f13	protein_coding	2	0.000436607	0.751018	0.000843739
ENSMUSG00000042460	C1galt1	protein_coding	2	0.000440467	0.786721	1.62433e-06
ENSMUSG00000029171	Pgm1	protein_coding	2	0.000443223	0.755872	0.000750846
ENSMUSG00000028416	Bag1	protein_coding	2	0.000450191	0.820232	1.57645e-09
ENSMUSG00000025085	Ablim1	protein_coding	2	0.000458454	0.818979	1.42065e-06
ENSMUSG00000055926	Gm14137	protein_coding	2	0.000464877	0.739587	4.83054e-05
ENSMUSG00000042305	Tmem183a	protein_coding	2	0.000471288	0.803163	0.00021404
ENSMUSG00000055415	Atp10b	protein_coding	2	0.000508486	0.773724	2.99504e-05
ENSMUSG00000053559	Smagp	protein_coding	2	0.000523148	0.783589	0.000769903
ENSMUSG00000030228	Pik3c2g	protein_coding	2	0.000524447	0.769652	0.00290769
ENSMUSG00000021097	Clmn	protein_coding	2	0.000531963	0.791889	0.003349
ENSMUSG00000031438	Rnf128	protein_coding	2	0.000538444	0.818353	1.15053e-12
ENSMUSG00000028081	Rps3a1	protein_coding	2	0.000550981	0.822424	0.00157089
ENSMUSG00000028337	Coro2a	protein_coding	2	0.00056328	0.805825	3.71442e-07
ENSMUSG00000031098	Syt8	protein_coding	2	0.000594473	0.783902	1.35387e-07
ENSMUSG00000047230	Cldn2	protein_coding	2	0.000615947	0.791732	6.41197e-08
ENSMUSG00000029780	Nt5c3	protein_coding	2	0.000650713	0.812715	0.000114937
ENSMUSG00000031483	Erlin2	protein_coding	2	0.000714933	0.786408	0.000430031
ENSMUSG00000049307	Fut4	protein_coding	2	0.000745802	0.702004	0.00490275
ENSMUSG00000030711	Sult1a1	protein_coding	2	0.000762545	0.760257	0.00407046
ENSMUSG00000019734	Tmc4	protein_coding	2	0.000839973	0.8171	7.68373e-06
ENSMUSG00000033590	Myo5c	protein_coding	2	0.000840306	0.801754	0.000621894
ENSMUSG00000031298	Adgrg2	protein_coding	2	0.000886337	0.7316	0.00041266
ENSMUSG00000052656	Rnf103	protein_coding	2	0.00093567	0.778108	0.00222015
ENSMUSG00000056692	D17Wsu92e	protein_coding	2	0.000939364	0.792202	0.00602036
ENSMUSG00000036427	Gpi1	protein_coding	2	0.000950966	0.814594	0.000486707
ENSMUSG00000003458	Ncstn	protein_coding	2	0.000951791	0.796117	0.000892731
ENSMUSG00000020407	Upp1	protein_coding	2	0.000959187	0.730974	0.000317155
ENSMUSG00000028691	Prdx1	protein_coding	2	0.000986046	0.81616	0.00059069
ENSMUSG00000029559	2210016L21Rik	protein_coding	2	0.00100016	0.790479	0.00174379
ENSMUSG00000022587	Ly6e	protein_coding	2	0.00107486	0.815221	0.000873141
ENSMUSG00000109719	RP24-247M18.5	TEC	2	0.00115931	0.802067	0.00220891
ENSMUSG00000027035	Cers6	protein_coding	2	0.00118704	0.756342	0.00631819
ENSMUSG00000032527	Pccb	protein_coding	2	0.00122016	0.753993	0.00205648
ENSMUSG00000021983	Atp8a2	protein_coding	2	0.00122099	0.706232	0.00629315
ENSMUSG00000007034	Slc44a4	protein_coding	2	0.00126516	0.783433	0.000731019
ENSMUSG00000025016	Tm9sf3	protein_coding	2	0.00134347	0.811776	0.00304008
ENSMUSG00000030231	Plekha5	protein_coding	2	0.00135951	0.762919	0.00833874
ENSMUSG00000090124	Ugt1a7c	protein_coding	2	0.00138559	0.788287	4.69158e-10
ENSMUSG00000048164	Gm7204	processed_pseudogene	2	0.0014073	0.807078	0.00323295
ENSMUSG00000050043	Tmx2	protein_coding	2	0.00142116	0.784685	7.77302e-05
ENSMUSG00000034382	AI661453	protein_coding	2	0.00142868	0.785781	0.000352358
ENSMUSG00000047180	Neurl3	protein_coding	2	0.00142909	0.801127	8.87927e-09
ENSMUSG00000021211	Akr1c12	protein_coding	2	0.00142909	0.701378	0.00193308
ENSMUSG00000108521	Gm44639	TEC	2	0.00148051	0.752271	0.00801234
ENSMUSG00000041272	Tox	protein_coding	2	0.00152013	0.785155	8.59584e-07
ENSMUSG00000005148	Klf5	protein_coding	2	0.00172167	0.80285	0.00212199
ENSMUSG00000023048	Prr13	protein_coding	2	0.00175399	0.808957	0.00010773
ENSMUSG00000021266	Wars	protein_coding	2	0.00188447	0.787191	0.00995633
ENSMUSG00000053253	Ndfip2	protein_coding	2	0.00189507	0.793298	0.000170253
ENSMUSG00000040111	Gramd1b	protein_coding	2	0.00196695	0.751801	0.00742925
ENSMUSG00000014074	Rnf168	protein_coding	2	0.00201103	0.727842	0.00644757
ENSMUSG00000019851	Perp	protein_coding	2	0.00209363	0.795803	4.53386e-07
ENSMUSG00000034255	Arhgap27	protein_coding	2	0.00216303	0.76699	3.21742e-05
ENSMUSG00000073471	Rsph3a	protein_coding	2	0.00216365	0.705606	0.00845253
ENSMUSG00000026670	Uap1	protein_coding	2	0.00229072	0.803633	3.20864e-05
ENSMUSG00000013523	Bcas1	protein_coding	2	0.00240484	0.689947	0.0137453
ENSMUSG00000045594	Glb1	protein_coding	2	0.00242222	0.741309	0.0139182
ENSMUSG00000035852	Misp	protein_coding	2	0.00242684	0.7316	0.00642399
ENSMUSG00000047496	Rnf152	protein_coding	2	0.00252322	0.71735	0.00125344
ENSMUSG00000025162	Csnk1d	protein_coding	2	0.00255349	0.782023	0.00289783
ENSMUSG00000033898	Cfhr2	protein_coding	2	0.00258591	0.71093	0.0140441
ENSMUSG00000018166	Erbb3	protein_coding	2	0.00261376	0.799562	0.000120722
ENSMUSG00000024799	Tm7sf2	protein_coding	2	0.00272405	0.703883	0.00831015
ENSMUSG00000031996	Aplp2	protein_coding	2	0.00279591	0.804573	0.0102109
ENSMUSG00000037605	Adgrl3	protein_coding	2	0.00291439	0.746163	0.00147529
ENSMUSG00000057963	Itpk1	protein_coding	2	0.00295974	0.703257	0.0148584
ENSMUSG00000046223	Plaur	protein_coding	2	0.00305483	0.801754	1.81709e-12
ENSMUSG00000069049	Eif2s3y	protein_coding	2	0.00310091	0.739117	4.85428e-05
ENSMUSG00000024556	Me2	protein_coding	2	0.00312058	0.736768	0.00109445
ENSMUSG00000038775	Vill	protein_coding	2	0.00337626	0.752584	0.000842177
ENSMUSG00000023019	Gpd1	protein_coding	2	0.0034419	0.765424	0.00557354
ENSMUSG00000022843	Clcn2	protein_coding	2	0.00352555	0.755716	0.00555058
ENSMUSG00000096979	Gm26880	lincRNA	2	0.00354912	0.799875	3.92762e-13
ENSMUSG00000030605	Mfge8	protein_coding	2	0.00357332	0.757282	0.0205741
ENSMUSG00000028488	Sh3gl2	protein_coding	2	0.00362764	0.698246	0.0197256
ENSMUSG00000024773	Atg2a	protein_coding	2	0.00366263	0.77388	0.0208555
ENSMUSG00000006589	Aprt	protein_coding	2	0.00366825	0.785468	0.0123209
ENSMUSG00000004633	Chn2	protein_coding	2	0.00376627	0.727842	0.000954284
ENSMUSG00000014725	Adam28	protein_coding	2	0.0037826	0.697933	0.0234493
ENSMUSG00000031371	Haus7	protein_coding	2	0.00407079	0.716411	0.0170033
ENSMUSG00000027422	Rrbp1	protein_coding	2	0.00409616	0.799875	0.000589541
ENSMUSG00000089838	Gm2962	processed_pseudogene	2	0.00424236	0.794551	0.0205733
ENSMUSG00000079470	Utp14b	protein_coding	2	0.00424671	0.736298	0.0170167
ENSMUSG00000022941	Ripply3	protein_coding	2	0.00441864	0.728938	0.000597556
ENSMUSG00000019558	Slc6a8	protein_coding	2	0.0046887	0.730817	0.0119376
ENSMUSG00000035451	Foxa1	protein_coding	2	0.0048013	0.756029	0.0285338
ENSMUSG00000000275	Trim25	protein_coding	2	0.00489481	0.781553	0.00440028
ENSMUSG00000026435	Slc45a3	protein_coding	2	0.00525834	0.773411	1.40663e-08
ENSMUSG00000038903	Ccdc68	protein_coding	2	0.0052872	0.73207	0.0294605
ENSMUSG00000024180	Tmem8	protein_coding	2	0.00534132	0.742562	0.0162901
ENSMUSG00000041774	Ydjc	protein_coding	2	0.00547836	0.701848	0.0318656
ENSMUSG00000027399	Il1a	protein_coding	2	0.00548239	0.792671	3.04264e-14
ENSMUSG00000025997	Ikzf2	protein_coding	2	0.00562817	0.768243	0.000301685
ENSMUSG00000070985	Acnat1	protein_coding	2	0.00574335	0.687598	0.0266826
ENSMUSG00000006169	Clint1	protein_coding	2	0.00575232	0.791106	0.000748783
ENSMUSG00000001348	Acp5	protein_coding	2	0.00677289	0.751018	3.79739e-06
ENSMUSG00000052151	Plpp2	protein_coding	2	0.00685853	0.780144	2.43977e-08
ENSMUSG00000027695	Pld1	protein_coding	2	0.0068904	0.779361	0.0416717
ENSMUSG00000035133	Arhgap5	protein_coding	2	0.00715557	0.792045	1.9667e-05
ENSMUSG00000034127	Tspan8	protein_coding	2	0.00750625	0.792358	4.03043e-12
ENSMUSG00000028096	Gpr89	protein_coding	2	0.00752171	0.716724	0.04234
ENSMUSG00000022151	Ttc33	protein_coding	2	0.00762216	0.7601	0.0028451
ENSMUSG00000003623	Crot	protein_coding	2	0.00769808	0.757282	0.0445907
ENSMUSG00000021771	Vdac2	protein_coding	2	0.00851101	0.789853	0.00148915
ENSMUSG00000034981	Parm1	protein_coding	2	0.00856516	0.780927	2.58244e-13
ENSMUSG00000000440	Pparg	protein_coding	2	0.00876565	0.737864	0.00246864
ENSMUSG00000034714	Ttyh2	protein_coding	2	0.00886965	0.749922	0.0164744
ENSMUSG00000034917	Tjp3	protein_coding	2	0.00890916	0.767773	0.0197256
ENSMUSG00000031639	Tlr3	protein_coding	2	0.00901746	0.70404	0.0153934
ENSMUSG00000003382	Etv3	protein_coding	2	0.00931545	0.784842	5.25892e-07
ENSMUSG00000034522	Zfp395	protein_coding	2	0.00936467	0.712183	0.0298708
ENSMUSG00000030800	Prss8	protein_coding	2	0.00952583	0.769026	0.0299183
ENSMUSG00000026277	Stk25	protein_coding	2	0.00960965	0.789853	0.00013175
ENSMUSG00000019088	Dnase1l1	protein_coding	2	0.00965989	0.728782	0.0575791
ENSMUSG00000106734	Gm20559	processed_transcript	2	0.00969223	0.757595	2.90559e-05
ENSMUSG00000082100	Glns-ps1	processed_pseudogene	2	0.00989127	0.711713	0.048582
ENSMUSG00000026617	Bpnt1	protein_coding	2	0.0101459	0.771062	0.0390695
ENSMUSG00000071076	Jund	protein_coding	2	0.0102261	0.78954	0.0448349
ENSMUSG00000024900	Cpt1a	protein_coding	2	0.0103709	0.762919	0.00145929
ENSMUSG00000074272	Ceacam1	protein_coding	2	0.0104953	0.76699	0.0558849
ENSMUSG00000015488	Cacfd1	protein_coding	2	0.0109352	0.733793	0.0305421
ENSMUSG00000022791	Tnk2	protein_coding	2	0.0119571	0.763545	0.0630765
ENSMUSG00000029020	Mfn2	protein_coding	2	0.012027	0.720013	0.070814
ENSMUSG00000025103	Btbd1	protein_coding	2	0.0120734	0.74679	0.0138811
ENSMUSG00000021196	Pfkp	protein_coding	2	0.0127171	0.760727	0.0537685
ENSMUSG00000050730	Arhgap42	protein_coding	2	0.0129286	0.706702	0.0744265
ENSMUSG00000062353	Gm15772	processed_pseudogene	2	0.0131368	0.777169	0.0552776
ENSMUSG00000019997	Ctgf	protein_coding	2	0.0138002	0.71876	0.0637121
ENSMUSG00000099684	Gm28356	transcribed_unprocessed_pseudogene	2	0.0145238	0.669277	0.012597
ENSMUSG00000050520	Cldn8	protein_coding	2	0.0147429	0.728938	0.028565
ENSMUSG00000021282	Eif5	protein_coding	2	0.0152132	0.784842	0.0834763
ENSMUSG00000003644	Rps6ka1	protein_coding	2	0.0153463	0.77482	0.0149467
ENSMUSG00000047040	Prr15l	protein_coding	2	0.0157688	0.774507	0.0827286
ENSMUSG00000064373	Sepp1	protein_coding	2	0.0159452	0.783902	0.0287091
ENSMUSG00000000088	Cox5a	protein_coding	2	0.0159452	0.783746	0.0370938
ENSMUSG00000019320	Noxo1	protein_coding	2	0.0160596	0.704823	0.0541668
ENSMUSG00000039163	Cmc1	protein_coding	2	0.0164619	0.764798	0.00425318
ENSMUSG00000044080	S100a1	protein_coding	2	0.0166052	0.782963	0.074639
ENSMUSG00000028772	Zcchc17	protein_coding	2	0.0171057	0.746163	0.0391068
ENSMUSG00000045005	Fzd5	protein_coding	2	0.0182856	0.720639	0.102533
ENSMUSG00000026594	Ralgps2	protein_coding	2	0.0184987	0.749452	0.00440879
ENSMUSG00000033998	Kcnk1	protein_coding	2	0.0185275	0.772628	1.60891e-05
ENSMUSG00000046516	Cox17	protein_coding	2	0.0185765	0.78124	0.00629706
ENSMUSG00000028672	Hmgcl	protein_coding	2	0.018718	0.735828	0.0241778
ENSMUSG00000040462	Os9	protein_coding	2	0.0187644	0.777012	0.0524119
ENSMUSG00000037580	Gch1	protein_coding	2	0.0202134	0.733323	0.00335533
ENSMUSG00000063838	Cdc42ep5	protein_coding	2	0.0202292	0.757751	1.86723e-07
ENSMUSG00000024646	Cyb5a	protein_coding	2	0.020524	0.781084	0.102588
ENSMUSG00000029062	Cdk11b	protein_coding	2	0.0208799	0.779831	0.000470698
ENSMUSG00000025785	Exosc7	protein_coding	2	0.0218088	0.752584	0.0912686
ENSMUSG00000020653	Klf11	protein_coding	2	0.0218564	0.737551	0.00524828
ENSMUSG00000020541	Tom1l1	protein_coding	2	0.0224148	0.748669	0.125987
ENSMUSG00000060961	Slc4a4	protein_coding	2	0.0227643	0.770749	0.00057894
ENSMUSG00000044609	Gm9294	processed_pseudogene	2	0.0229092	0.77388	0.117018
ENSMUSG00000005483	Dnajb1	protein_coding	2	0.0241297	0.772001	0.0127069
ENSMUSG00000002633	Shh	protein_coding	2	0.0241367	0.698559	0.0176216
ENSMUSG00000036136	Fam110c	protein_coding	2	0.0245217	0.713436	0.000748202
ENSMUSG00000049323	Smcr8	protein_coding	2	0.0250466	0.715471	0.0557626
ENSMUSG00000038155	Gstp2	protein_coding	2	0.025794	0.68932	0.144326
ENSMUSG00000044678	Ly6k	protein_coding	2	0.0265928	0.735515	0.105412
ENSMUSG00000091971	Hspa1a	protein_coding	2	0.0269457	0.771531	0.0774616
ENSMUSG00000053279	Aldh1a1	protein_coding	2	0.02714	0.772941	1.09655e-05
ENSMUSG00000033684	Qsox1	protein_coding	2	0.0274376	0.728469	0.119329
ENSMUSG00000020553	Pctp	protein_coding	2	0.0276719	0.72471	0.157631
ENSMUSG00000029311	Hsd17b11	protein_coding	2	0.0277292	0.7684	0.0933743
ENSMUSG00000053477	Tcf4	protein_coding	2	0.02847	0.768086	0.127101
ENSMUSG00000032239	Rp9	protein_coding	2	0.0290399	0.741935	0.0551036
ENSMUSG00000022696	Sidt1	protein_coding	2	0.0294207	0.678672	0.166431
ENSMUSG00000097906	Gm9625	processed_pseudogene	2	0.0295448	0.775133	0.0033838
ENSMUSG00000045180	Shroom2	protein_coding	2	0.0300541	0.717977	0.0151071
ENSMUSG00000033499	Larp4b	protein_coding	2	0.0302576	0.77529	0.0277355
ENSMUSG00000036053	Fmnl2	protein_coding	2	0.0307852	0.701691	0.0240103
ENSMUSG00000062963	Ufc1	protein_coding	2	0.0310873	0.764172	0.0289123
ENSMUSG00000041219	Arhgap11a	protein_coding	2	0.0311448	0.693548	0.0637629
ENSMUSG00000020889	Nr1d1	protein_coding	2	0.0314554	0.769652	0.178414
ENSMUSG00000020522	Mfap3	protein_coding	2	0.0316139	0.706389	0.0172252
ENSMUSG00000000171	Sdhd	protein_coding	2	0.031703	0.771688	6.33286e-07
ENSMUSG00000020111	Micu1	protein_coding	2	0.0320005	0.752584	0.0442741
ENSMUSG00000085795	Zfp703	protein_coding	2	0.0320005	0.752584	0.0535914
ENSMUSG00000022890	Atp5j	protein_coding	2	0.0320353	0.775759	0.0295809
ENSMUSG00000045799	Gm9800	pseudogene	2	0.0320947	0.768556	0.0492085
ENSMUSG00000049858	Suox	protein_coding	2	0.0328165	0.687285	0.0516047
ENSMUSG00000038366	Lasp1	protein_coding	2	0.0330333	0.774194	6.33802e-05
ENSMUSG00000079559	Gm684	protein_coding	2	0.0332422	0.674288	0.135427
ENSMUSG00000062397	Zfp706	protein_coding	2	0.0333905	0.773254	0.104464
ENSMUSG00000046324	Ermp1	protein_coding	2	0.0340527	0.746477	0.0672332
ENSMUSG00000071655	Ubxn1	protein_coding	2	0.0347144	0.772158	0.012874
ENSMUSG00000081640	Rplp0-ps1	processed_pseudogene	2	0.0349257	0.7601	0.000962486
ENSMUSG00000001247	Lsr	protein_coding	2	0.0351903	0.76699	7.65391e-05
ENSMUSG00000016150	Tenm1	protein_coding	2	0.0360025	0.673661	0.0752191
ENSMUSG00000031488	Rab11fip1	protein_coding	2	0.0369955	0.773254	0.000210845
ENSMUSG00000059142	Zfp945	protein_coding	2	0.037131	0.702474	0.175334
ENSMUSG00000062157	Ifnlr1	protein_coding	2	0.0371778	0.689164	0.114854
ENSMUSG00000039193	Nlrc4	protein_coding	2	0.0384449	0.679768	0.0966357
ENSMUSG00000094530	Gm21399	processed_pseudogene	2	0.0387251	0.772941	0.0191868
ENSMUSG00000011114	Tbrg1	protein_coding	2	0.0388904	0.770279	0.00181834
ENSMUSG00000024036	Slc37a1	protein_coding	2	0.0390545	0.741309	0.014957
ENSMUSG00000050856	Atp5k	protein_coding	2	0.0403697	0.772158	0.224845
ENSMUSG00000002768	Mea1	protein_coding	2	0.0405832	0.767303	0.00267047
ENSMUSG00000026365	Cfh	protein_coding	2	0.041034	0.764172	3.49952e-07
ENSMUSG00000027463	Slc52a3	protein_coding	2	0.0424918	0.701221	0.0999812
ENSMUSG00000041977	Arhgef11	protein_coding	2	0.0438475	0.672095	0.082694
ENSMUSG00000025779	Ly96	protein_coding	2	0.0438913	0.695897	0.1231
ENSMUSG00000105071	Gm43336	TEC	2	0.0459363	0.67507	0.24808
ENSMUSG00000039457	Ppl	protein_coding	2	0.0466559	0.763545	0.000150615
ENSMUSG00000003923	Tfam	protein_coding	2	0.0475476	0.733793	0.260422
ENSMUSG00000042962	Gm5436	processed_pseudogene	2	0.0496269	0.752897	0.184964
ENSMUSG00000030110	Ret	protein_coding	2	0.0496269	0.674444	0.191888
ENSMUSG00000039774	Galnt12	protein_coding	2	0.0501181	0.677576	0.198869
ENSMUSG00000090231	Cfb	protein_coding	2	0.0524082	0.739273	7.93751e-06
ENSMUSG00000100774	Gm7329	processed_pseudogene	2	0.054572	0.729408	0.0237502
ENSMUSG00000041444	Arhgap32	protein_coding	2	0.0555154	0.724554	0.0360103
ENSMUSG00000020151	Ptprr	protein_coding	2	0.0563096	0.707642	0.17325
ENSMUSG00000020911	Krt19	protein_coding	2	0.0573633	0.768243	9.50133e-13
ENSMUSG00000008140	Emc10	protein_coding	2	0.0577392	0.740526	0.0150822
ENSMUSG00000073002	Vamp5	protein_coding	2	0.0579121	0.736925	0.237049
ENSMUSG00000082121	Gm8199	processed_pseudogene	2	0.0585224	0.74037	0.000945158
ENSMUSG00000052609	Plekhg3	protein_coding	2	0.0588978	0.717037	0.0116111
ENSMUSG00000036528	Ppfibp2	protein_coding	2	0.0592283	0.749139	0.0290022
ENSMUSG00000039701	Usp53	protein_coding	2	0.0602249	0.759474	0.162619
ENSMUSG00000024937	Ehbp1l1	protein_coding	2	0.0607147	0.712966	0.0724664
ENSMUSG00000036097	Fam178a	protein_coding	2	0.0613984	0.746946	0.256487
ENSMUSG00000058600	Rpl30	protein_coding	2	0.0614873	0.767617	0.167973
ENSMUSG00000026447	Pik3c2b	protein_coding	2	0.0646392	0.757595	0.00188412
ENSMUSG00000038712	Fam63a	protein_coding	2	0.0681821	0.73254	0.361377
ENSMUSG00000062376	Borcs7	protein_coding	2	0.0684929	0.70357	0.356512
ENSMUSG00000001300	Efnb2	protein_coding	2	0.0689658	0.755716	0.000549756
ENSMUSG00000025364	Pa2g4	protein_coding	2	0.0691109	0.759944	0.0277159
ENSMUSG00000040188	Scamp2	protein_coding	2	0.0697812	0.759004	0.0294533
ENSMUSG00000034781	Gna11	protein_coding	2	0.0707408	0.751644	0.125778
ENSMUSG00000032086	Bace1	protein_coding	2	0.0710453	0.752271	0.362561
ENSMUSG00000029687	Ezh2	protein_coding	2	0.0720591	0.731914	0.381628
ENSMUSG00000030494	Rhpn2	protein_coding	2	0.0729902	0.755559	0.000113009
ENSMUSG00000032340	Neo1	protein_coding	2	0.0750194	0.706859	0.182196
ENSMUSG00000003559	As3mt	protein_coding	2	0.0761609	0.677106	0.154353
ENSMUSG00000003814	Calr	protein_coding	2	0.0771243	0.764485	0.147358
ENSMUSG00000036835	Psenen	protein_coding	2	0.078106	0.760727	0.108954
ENSMUSG00000037710	Cisd1	protein_coding	2	0.0788521	0.751644	0.0741713
ENSMUSG00000026342	Slc35f5	protein_coding	2	0.0808882	0.751331	0.00731018
ENSMUSG00000070661	Rnf186	protein_coding	2	0.0818741	0.735359	0.389114
ENSMUSG00000031827	Cotl1	protein_coding	2	0.0819975	0.723458	0.0537234
ENSMUSG00000026932	Nacc2	protein_coding	2	0.0820858	0.684936	0.28484
ENSMUSG00000059742	Kcnh7	protein_coding	2	0.0834475	0.703727	0.346068
ENSMUSG00000036138	Acaa1a	protein_coding	2	0.0847266	0.752584	0.0412141
ENSMUSG00000003279	Dlgap1	protein_coding	2	0.0848037	0.676167	0.0623809
ENSMUSG00000063065	Mapk3	protein_coding	2	0.0858687	0.759787	0.309884
ENSMUSG00000029178	Klf3	protein_coding	2	0.0883199	0.761979	0.474065
ENSMUSG00000110141	RP24-196H4.2	TEC	2	0.088977	0.652051	0.446714
ENSMUSG00000033871	Ppargc1b	protein_coding	2	0.0894581	0.643909	0.409125
ENSMUSG00000015002	Efr3a	protein_coding	2	0.0895016	0.753523	0.0799662
ENSMUSG00000053560	Ier2	protein_coding	2	0.0904064	0.758847	0.484337
ENSMUSG00000027536	Chmp4c	protein_coding	2	0.0912188	0.730504	0.015396
ENSMUSG00000083219	Gm11410	processed_pseudogene	2	0.0929017	0.757595	0.190892
ENSMUSG00000106917	Gm7832	processed_pseudogene	2	0.0963479	0.723144	0.0856523
ENSMUSG00000028383	Hsdl2	protein_coding	2	0.0964403	0.734576	0.206406
ENSMUSG00000028961	Pgd	protein_coding	2	0.0987134	0.760413	0.0817391
ENSMUSG00000036731	Cysrt1	protein_coding	2	0.100392	0.647197	0.520701
ENSMUSG00000035342	Lzts2	protein_coding	2	0.101675	0.690573	0.320584
ENSMUSG00000046519	Golph3l	protein_coding	2	0.103498	0.71782	0.32476
ENSMUSG00000033335	Dnm2	protein_coding	2	0.104061	0.748199	0.281823
ENSMUSG00000024457	Trim26	protein_coding	2	0.104295	0.720795	0.366608
ENSMUSG00000021468	Sptlc1	protein_coding	2	0.10591	0.727529	0.0451173
ENSMUSG00000028664	Ephb2	protein_coding	2	0.108706	0.692296	0.13965
ENSMUSG00000030774	Pak1	protein_coding	2	0.109119	0.740056	0.0064783
ENSMUSG00000031681	Smad1	protein_coding	2	0.109402	0.752427	6.41998e-05
ENSMUSG00000026883	Dab2ip	protein_coding	2	0.112069	0.743815	0.0711995
ENSMUSG00000039157	Fam102a	protein_coding	2	0.112437	0.737864	0.150572
ENSMUSG00000051483	Cbr1	protein_coding	2	0.112826	0.752897	0.0335303
ENSMUSG00000022711	Pmm2	protein_coding	2	0.115038	0.719699	0.504652
ENSMUSG00000041225	Arhgap12	protein_coding	2	0.118279	0.755089	0.00138204
ENSMUSG00000009647	Mcu	protein_coding	2	0.120716	0.755872	0.00859374
ENSMUSG00000021367	Edn1	protein_coding	2	0.124024	0.742562	0.00635957
ENSMUSG00000023232	Serinc2	protein_coding	2	0.126869	0.750078	5.94841e-09
ENSMUSG00000032300	1700017B05Rik	protein_coding	2	0.129134	0.721265	3.1634e-05
ENSMUSG00000019969	Psen1	protein_coding	2	0.129761	0.726433	0.284907
ENSMUSG00000038781	Stap2	protein_coding	2	0.131526	0.742562	0.029629
ENSMUSG00000035105	Egln3	protein_coding	2	0.133256	0.710147	0.00046657
ENSMUSG00000030064	Frmd4b	protein_coding	2	0.13336	0.756342	8.74722e-05
ENSMUSG00000032046	Abhd12	protein_coding	2	0.13717	0.709834	0.533884
ENSMUSG00000050627	Gpd1l	protein_coding	2	0.138305	0.720482	0.0199662
ENSMUSG00000037408	Cnnm4	protein_coding	2	0.138903	0.724397	0.101237
ENSMUSG00000056737	Capg	protein_coding	2	0.139796	0.751644	0.000535661
ENSMUSG00000024812	Tjp2	protein_coding	2	0.140295	0.755089	9.58073e-07
ENSMUSG00000025647	Shisa5	protein_coding	2	0.141567	0.754619	0.0593339
ENSMUSG00000074886	Grk6	protein_coding	2	0.146903	0.699969	0.615652
ENSMUSG00000036775	Decr2	protein_coding	2	0.149061	0.744284	0.00805549
ENSMUSG00000036707	Cab39	protein_coding	2	0.150445	0.75321	0.78466
ENSMUSG00000058070	Eml1	protein_coding	2	0.150495	0.693548	0.0345825
ENSMUSG00000036606	Plxnb2	protein_coding	2	0.152373	0.754306	0.00115594
ENSMUSG00000052105	Mtcl1	protein_coding	2	0.153532	0.720639	0.714763
ENSMUSG00000098641	Rnu3b4	snoRNA	2	0.153948	0.747103	0.0708755
ENSMUSG00000098925	Rnu3b2	snoRNA	2	0.153948	0.747103	0.0708755
ENSMUSG00000104856	Rnu3b3	snoRNA	2	0.153948	0.747103	0.0708755
ENSMUSG00000105025	Rnu3b1	snoRNA	2	0.153948	0.747103	0.0708755
ENSMUSG00000028032	Papss1	protein_coding	2	0.155812	0.711713	0.285306
ENSMUSG00000022195	6030458C11Rik	protein_coding	2	0.156158	0.678985	0.805662
ENSMUSG00000018900	Slc22a5	protein_coding	2	0.161344	0.696993	0.80037
ENSMUSG00000033628	Pik3c3	protein_coding	2	0.162558	0.712809	0.843056
ENSMUSG00000105055	Gm43079	antisense	2	0.164317	0.683526	0.117998
ENSMUSG00000028343	Erp44	protein_coding	2	0.164455	0.739743	0.0043048
ENSMUSG00000024580	Grpel2	protein_coding	2	0.165188	0.73896	0.000777574
ENSMUSG00000031834	Pik3r2	protein_coding	2	0.165188	0.707798	0.0958272
ENSMUSG00000096914	Galntl6	protein_coding	2	0.169185	0.664109	0.861007
ENSMUSG00000024958	Gpr137	protein_coding	2	0.170111	0.692296	0.734344
ENSMUSG00000022865	Cxadr	protein_coding	2	0.172833	0.751957	9.85237e-05
ENSMUSG00000021948	Prkcd	protein_coding	2	0.1733	0.745067	0.0466484
ENSMUSG00000026922	Agpat2	protein_coding	2	0.174844	0.707172	0.827162
ENSMUSG00000106926	Rpl7-ps7	processed_pseudogene	2	0.180628	0.743501	0.0920948
ENSMUSG00000003418	St8sia6	protein_coding	2	0.184921	0.679925	0.406954
ENSMUSG00000024835	Coro1b	protein_coding	2	0.188787	0.744441	0.160824
ENSMUSG00000006567	Atp7b	protein_coding	2	0.190389	0.695271	0.851911
ENSMUSG00000022747	St3gal6	protein_coding	2	0.193725	0.71923	0.882158
ENSMUSG00000033187	BC016579	protein_coding	2	0.194233	0.679455	0.41514
ENSMUSG00000009828	Ick	protein_coding	2	0.202311	0.734889	0.70874
ENSMUSG00000060012	Kif13b	protein_coding	2	0.206292	0.725493	0.472888
ENSMUSG00000024479	Mal2	protein_coding	2	0.210897	0.750078	7.77404e-05
ENSMUSG00000029616	Erp29	protein_coding	2	0.212237	0.737864	1
ENSMUSG00000040648	Ppip5k2	protein_coding	2	0.212528	0.733479	0.0191439
ENSMUSG00000029063	Nadk	protein_coding	2	0.212528	0.73849	0.052614
ENSMUSG00000043192	Gm1840	processed_pseudogene	2	0.213316	0.70498	0.269665
ENSMUSG00000026275	Ppp1r7	protein_coding	2	0.213316	0.715471	0.352971
ENSMUSG00000028164	Manba	protein_coding	2	0.216309	0.704823	0.661076
ENSMUSG00000022575	Gsdmd	protein_coding	2	0.22583	0.722205	0.00879884
ENSMUSG00000102049	Zbed6	protein_coding	2	0.22583	0.722205	0.0185144
ENSMUSG00000038240	Pdss2	protein_coding	2	0.226927	0.667397	1
ENSMUSG00000041220	Elovl6	protein_coding	2	0.236159	0.694958	0.0246674
ENSMUSG00000044864	Ankrd50	protein_coding	2	0.254232	0.694175	0.0124643
ENSMUSG00000059883	Irak4	protein_coding	2	0.258612	0.71187	0.426241
ENSMUSG00000054889	Dsp	protein_coding	2	0.261453	0.746007	4.2706e-11
ENSMUSG00000029084	Cd38	protein_coding	2	0.262832	0.683526	0.505206
ENSMUSG00000059588	Calcrl	protein_coding	2	0.264796	0.673974	0.415567
ENSMUSG00000023022	Lima1	protein_coding	2	0.268201	0.744754	5.55795e-05
ENSMUSG00000008435	Rdh13	protein_coding	2	0.278225	0.737864	1
ENSMUSG00000012350	Ehf	protein_coding	2	0.27883	0.746007	1.29701e-05
ENSMUSG00000054545	Ugt1a6a	protein_coding	2	0.291539	0.704666	1
ENSMUSG00000021990	Spata13	protein_coding	2	0.295308	0.71782	0.122288
ENSMUSG00000021638	Ocln	protein_coding	2	0.296352	0.742875	2.32247e-09
ENSMUSG00000024401	Tnf	protein_coding	2	0.306131	0.735515	1.70609e-08
ENSMUSG00000050103	Agmo	protein_coding	2	0.308731	0.664579	0.823356
ENSMUSG00000026123	Plekhb2	protein_coding	2	0.310082	0.745067	0.122151
ENSMUSG00000037824	Tspan14	protein_coding	2	0.31095	0.729408	0.00215929
ENSMUSG00000040018	Cox15	protein_coding	2	0.31132	0.681804	0.00816836
ENSMUSG00000030748	Il4ra	protein_coding	2	0.325289	0.72471	1
ENSMUSG00000026380	Tfcp2l1	protein_coding	2	0.337925	0.742875	0.0950287
ENSMUSG00000021785	Ngly1	protein_coding	2	0.338419	0.715002	0.0196019
ENSMUSG00000000184	Ccnd2	protein_coding	2	0.339721	0.739117	0.134772
ENSMUSG00000019189	Rnf145	protein_coding	2	0.351682	0.714532	1
ENSMUSG00000032718	Mansc1	protein_coding	2	0.356505	0.695897	1
ENSMUSG00000028333	Anp32b	protein_coding	2	0.356869	0.741935	0.222576
ENSMUSG00000038342	Mlxip	protein_coding	2	0.357551	0.715471	0.728246
ENSMUSG00000015094	Npdc1	protein_coding	2	0.367165	0.733636	0.000301889
ENSMUSG00000074489	Bglap3	protein_coding	2	0.368083	0.651112	1
ENSMUSG00000034765	Dusp5	protein_coding	2	0.369749	0.741622	7.06058e-06
ENSMUSG00000033487	Fndc3a	protein_coding	2	0.373663	0.732853	1
ENSMUSG00000039005	Tlr4	protein_coding	2	0.374357	0.718133	0.000830554
ENSMUSG00000051339	2900026A02Rik	protein_coding	2	0.37646	0.719073	0.00719778
ENSMUSG00000054091	1810037I17Rik	protein_coding	2	0.377903	0.741935	0.988649
ENSMUSG00000042745	Id1	protein_coding	2	0.391877	0.708268	0.17379
ENSMUSG00000044712	Slc38a6	protein_coding	2	0.393643	0.699655	1
ENSMUSG00000036580	Spg20	protein_coding	2	0.395685	0.683526	1
ENSMUSG00000070733	Fryl	protein_coding	2	0.398394	0.726903	0.372911
ENSMUSG00000067161	Gm5560	processed_pseudogene	2	0.399873	0.730191	1
ENSMUSG00000023170	Gps2	protein_coding	2	0.40018	0.714062	0.162786
ENSMUSG00000001156	Mxd1	protein_coding	2	0.403998	0.728782	0.351611
ENSMUSG00000029102	Hgfac	protein_coding	2	0.408313	0.653304	1
ENSMUSG00000043088	Il17re	protein_coding	2	0.414934	0.715785	0.000364262
ENSMUSG00000005534	Insr	protein_coding	2	0.4158	0.714688	1
ENSMUSG00000040616	Tmem51	protein_coding	2	0.431064	0.680551	0.631111
ENSMUSG00000057101	Zfp180	protein_coding	2	0.433536	0.676167	0.966573
ENSMUSG00000029484	Anxa3	protein_coding	2	0.437152	0.740996	0.0416586
ENSMUSG00000027281	Slx4ip	protein_coding	2	0.439927	0.678202	0.128349
ENSMUSG00000059534	Uqcr10	protein_coding	2	0.439927	0.740683	1
ENSMUSG00000034320	Slc26a2	protein_coding	2	0.440157	0.724084	0.00288044
ENSMUSG00000030614	Tmem126b	protein_coding	2	0.44137	0.668963	1
ENSMUSG00000044018	Mrpl50	protein_coding	2	0.445637	0.702631	0.209959
ENSMUSG00000022419	Deptor	protein_coding	2	0.446341	0.736925	0.930756
ENSMUSG00000004535	Tax1bp1	protein_coding	2	0.447771	0.740683	0.0574872
ENSMUSG00000028293	Slc35a1	protein_coding	2	0.453278	0.713592	0.0216587
ENSMUSG00000032305	Fam219b	protein_coding	2	0.45768	0.711243	0.847376
ENSMUSG00000024268	Celf4	protein_coding	2	0.460132	0.699342	1
ENSMUSG00000027230	Creb3l1	protein_coding	2	0.46435	0.681804	1
ENSMUSG00000008601	Rab25	protein_coding	2	0.468059	0.735672	2.5001e-05
ENSMUSG00000031442	Mcf2l	protein_coding	2	0.486219	0.665518	1
ENSMUSG00000028184	Adgrl2	protein_coding	2	0.488536	0.711557	0.396061
ENSMUSG00000024369	Nelfe	protein_coding	2	0.489765	0.683213	0.549737
ENSMUSG00000087233	Gm43213	processed_pseudogene	2	0.490054	0.631225	1
ENSMUSG00000038803	Ost4	protein_coding	2	0.490295	0.73943	1
ENSMUSG00000007777	0610009B22Rik	protein_coding	2	0.495392	0.692139	1
ENSMUSG00000026972	Arrdc1	protein_coding	2	0.500484	0.734419	0.455238
ENSMUSG00000008393	Carhsp1	protein_coding	2	0.517348	0.719543	0.0326348
ENSMUSG00000020186	Csrp2	protein_coding	2	0.517871	0.664892	1
ENSMUSG00000074064	Mlycd	protein_coding	2	0.517951	0.664892	1
ENSMUSG00000025525	Apool	protein_coding	2	0.518325	0.682587	1
ENSMUSG00000025374	Nabp2	protein_coding	2	0.520017	0.684466	1
ENSMUSG00000025381	Cnpy2	protein_coding	2	0.52027	0.730348	0.274251
ENSMUSG00000024165	Hn1l	protein_coding	2	0.525924	0.729721	0.0905625
ENSMUSG00000068876	Cgn	protein_coding	2	0.54079	0.733323	1.01938e-06
ENSMUSG00000028776	Tinagl1	protein_coding	2	0.543374	0.716254	1
ENSMUSG00000025899	Alkbh8	protein_coding	2	0.54438	0.678046	0.657852
ENSMUSG00000038618	Rassf7	protein_coding	2	0.552379	0.709991	0.0445852
ENSMUSG00000028977	Casz1	protein_coding	2	0.556731	0.720952	1
ENSMUSG00000026088	Mitd1	protein_coding	2	0.566197	0.709677	0.554032
ENSMUSG00000015533	Itga2	protein_coding	2	0.569989	0.714688	5.23547e-06
ENSMUSG00000026729	4930562F07Rik	lincRNA	2	0.578284	0.695114	0.4923
ENSMUSG00000026687	Aldh9a1	protein_coding	2	0.578381	0.695114	1
ENSMUSG00000024462	Gabbr1	protein_coding	2	0.579846	0.685092	1
ENSMUSG00000026087	Mrpl30	protein_coding	2	0.586986	0.733323	0.00144922
ENSMUSG00000038056	Kmt2c	protein_coding	2	0.593814	0.734889	0.65356
ENSMUSG00000035171	1110059E24Rik	protein_coding	2	0.594982	0.712183	1
ENSMUSG00000029992	Gfpt1	protein_coding	2	0.6008	0.733949	0.0402193
ENSMUSG00000010080	Epn3	protein_coding	2	0.602832	0.715785	0.0951175
ENSMUSG00000026032	Ndufb3	protein_coding	2	0.609551	0.732227	1
ENSMUSG00000081228	Gm16089	processed_pseudogene	2	0.618083	0.719543	1
ENSMUSG00000108518	Gm5587	processed_pseudogene	2	0.626241	0.674444	0.673435
ENSMUSG00000049327	Kmt5a	protein_coding	2	0.631993	0.729721	0.00115711
ENSMUSG00000074221	Zfp568	protein_coding	2	0.634737	0.70357	0.478661
ENSMUSG00000003528	Slc25a1	protein_coding	2	0.638353	0.695427	1
ENSMUSG00000030538	Cib1	protein_coding	2	0.645437	0.721109	0.0206337
ENSMUSG00000082475	Gm7206	processed_pseudogene	2	0.655974	0.717194	1
ENSMUSG00000106751	Gm42467	TEC	2	0.65719	0.683683	1
ENSMUSG00000015092	Edf1	protein_coding	2	0.659788	0.731914	0.0158188
ENSMUSG00000030533	Unc45a	protein_coding	2	0.664624	0.724397	1
ENSMUSG00000047735	Samd9l	protein_coding	2	0.681402	0.730348	0.000535041
ENSMUSG00000020821	Kif1c	protein_coding	2	0.683059	0.723458	0.0877703
ENSMUSG00000021189	Atxn3	protein_coding	2	0.700246	0.69715	0.83592
ENSMUSG00000051355	Commd1	protein_coding	2	0.702967	0.704666	1
ENSMUSG00000021982	Cdadc1	protein_coding	2	0.706713	0.691199	1
ENSMUSG00000027997	Casp6	protein_coding	2	0.709708	0.699655	1
ENSMUSG00000031533	Mrps31	protein_coding	2	0.713053	0.666458	1
ENSMUSG00000097454	Gm26892	lincRNA	2	0.729075	0.668494	0.42708
ENSMUSG00000082815	Gm5678	protein_coding	2	0.731589	0.705293	0.568669
ENSMUSG00000042700	Sipa1l1	protein_coding	2	0.731589	0.705293	0.824156
ENSMUSG00000109925	RP23-74O12.8	processed_pseudogene	2	0.734882	0.721265	0.00204629
ENSMUSG00000010025	Aldh3a2	protein_coding	2	0.736765	0.715628	0.831646
ENSMUSG00000031558	Slit2	protein_coding	2	0.7407	0.710304	0.089936
ENSMUSG00000033671	Cep350	protein_coding	2	0.754424	0.726433	1
ENSMUSG00000030990	Pgap2	protein_coding	2	0.761414	0.714375	1
ENSMUSG00000035941	Ibtk	protein_coding	2	0.768845	0.720639	0.305798
ENSMUSG00000042229	Rabif	protein_coding	2	0.768902	0.674288	1
ENSMUSG00000024493	Lars	protein_coding	2	0.777815	0.719856	0.227183
ENSMUSG00000026201	Stk16	protein_coding	2	0.781073	0.69715	0.352971
ENSMUSG00000024976	Shoc2	protein_coding	2	0.784954	0.725023	0.00764687
ENSMUSG00000021870	Slmap	protein_coding	2	0.790664	0.726903	1
ENSMUSG00000087150	BC064078	transcribed_unprocessed_pseudogene	2	0.796014	0.705293	0.00237618
ENSMUSG00000027358	Bmp2	protein_coding	2	0.79605	0.704197	0.0168081
ENSMUSG00000054453	Sytl5	protein_coding	2	0.798371	0.64109	1
ENSMUSG00000042284	Itga1	protein_coding	2	0.801978	0.658002	1
ENSMUSG00000051256	Jagn1	protein_coding	2	0.813659	0.697933	1
ENSMUSG00000000154	Slc22a18	protein_coding	2	0.81637	0.693862	1
ENSMUSG00000032261	Sh3bgrl2	protein_coding	2	0.828566	0.722361	1.10788e-05
ENSMUSG00000025144	Stra13	protein_coding	2	0.841814	0.712183	1
ENSMUSG00000083621	Gm14586	processed_pseudogene	2	0.854498	0.730661	1
ENSMUSG00000019577	Pdk4	protein_coding	2	0.86118	0.673035	0.779411
ENSMUSG00000024982	Zdhhc6	protein_coding	2	0.863355	0.695897	1
ENSMUSG00000027684	Mecom	protein_coding	2	0.872018	0.730974	0.0588865
ENSMUSG00000029061	Mmp23	protein_coding	2	0.878312	0.659568	0.355924
ENSMUSG00000044134	Fam109a	protein_coding	2	0.885899	0.672722	1
ENSMUSG00000057933	Gsta2	protein_coding	2	0.885925	0.670686	0.0843232
ENSMUSG00000039699	Batf2	protein_coding	2	0.886881	0.614469	1
ENSMUSG00000037461	Ints7	protein_coding	2	0.898389	0.720169	1
ENSMUSG00000002233	Rhoc	protein_coding	2	0.908297	0.699029	0.00253059
ENSMUSG00000026341	Actr3	protein_coding	2	0.915774	0.730034	0.000308258
ENSMUSG00000025745	Hadha	protein_coding	2	0.933316	0.723771	1
ENSMUSG00000037994	Slc9b2	protein_coding	2	0.947014	0.667867	1
ENSMUSG00000038215	Cep44	protein_coding	2	0.958552	0.648293	1
ENSMUSG00000103653	Gm3934	processed_pseudogene	2	0.961141	0.717507	1
ENSMUSG00000073609	D2hgdh	protein_coding	2	0.97607	0.642343	1
ENSMUSG00000032418	Me1	protein_coding	2	0.977271	0.728469	0.0039715
ENSMUSG00000026603	Smyd2	protein_coding	2	0.981219	0.650799	1
ENSMUSG00000017781	Pitpna	protein_coding	2	0.982448	0.726589	0.00870364
ENSMUSG00000028256	Odf2l	protein_coding	2	0.999997	0.689947	1
ENSMUSG00000022994	Adcy6	protein_coding	2	1	0.704197	1.13433e-07
ENSMUSG00000020679	Hnf1b	protein_coding	2	1	0.705293	6.93473e-07
ENSMUSG00000038776	Ephx1	protein_coding	2	1	0.703101	4.26459e-06
ENSMUSG00000033386	Frrs1	protein_coding	2	1	0.688537	1.08222e-05
ENSMUSG00000090946	Ccdc71l	protein_coding	2	1	0.683683	1.75114e-05
ENSMUSG00000028128	F3	protein_coding	2	1	0.707329	1.93621e-05
ENSMUSG00000021493	Pdlim7	protein_coding	2	1	0.688851	2.26335e-05
ENSMUSG00000024985	Tcf7l2	protein_coding	2	1	0.724397	2.37494e-05
ENSMUSG00000027315	Spint1	protein_coding	2	1	0.715002	4.59315e-05
ENSMUSG00000009545	Kcnq1	protein_coding	2	1	0.689007	4.6751e-05
ENSMUSG00000038235	F11r	protein_coding	2	1	0.712653	7.46041e-05
ENSMUSG00000021957	Tkt	protein_coding	2	1	0.708738	9.9648e-05
ENSMUSG00000031451	Gas6	protein_coding	2	1	0.688381	0.00011556
ENSMUSG00000026638	Irf6	protein_coding	2	1	0.705606	0.000146168
ENSMUSG00000031078	Cttn	protein_coding	2	1	0.696837	0.000146499
ENSMUSG00000020644	Id2	protein_coding	2	1	0.713122	0.000324292
ENSMUSG00000020009	Ifngr1	protein_coding	2	1	0.707172	0.000325603
ENSMUSG00000072825	Cep170b	protein_coding	2	1	0.680864	0.000356413
ENSMUSG00000062203	Gspt1	protein_coding	2	1	0.67507	0.000362123
ENSMUSG00000037788	Vopp1	protein_coding	2	1	0.661917	0.000380105
ENSMUSG00000045095	Magi1	protein_coding	2	1	0.722831	0.000420417
ENSMUSG00000070044	Fam149a	protein_coding	2	1	0.677576	0.000426582
ENSMUSG00000055044	Pdlim1	protein_coding	2	1	0.695584	0.000513797
ENSMUSG00000038085	Cnbd2	protein_coding	2	1	0.680551	0.000625324
ENSMUSG00000090877	Hspa1b	protein_coding	2	1	0.678672	0.000715141
ENSMUSG00000028273	Pdlim5	protein_coding	2	1	0.716567	0.000841494
ENSMUSG00000007041	Clic1	protein_coding	2	1	0.722205	0.000915217
ENSMUSG00000037419	Endod1	protein_coding	2	1	0.692139	0.00095131
ENSMUSG00000051076	Vtcn1	protein_coding	2	1	0.650172	0.000956849
ENSMUSG00000047407	Tgif1	protein_coding	2	1	0.678672	0.000970748
ENSMUSG00000015961	Adss	protein_coding	2	1	0.66865	0.00102236
ENSMUSG00000070780	Rbm47	protein_coding	2	1	0.671782	0.00109662
ENSMUSG00000105987	AI506816	processed_transcript	2	1	0.72471	0.00131877
ENSMUSG00000074457	S100a16	protein_coding	2	1	0.674757	0.00163986
ENSMUSG00000030208	Emp1	protein_coding	2	1	0.694018	0.00172368
ENSMUSG00000029673	Auts2	protein_coding	2	1	0.681804	0.00187583
ENSMUSG00000062169	Cnih4	protein_coding	2	1	0.678359	0.00267733
ENSMUSG00000006219	Fblim1	protein_coding	2	1	0.674914	0.00312972
ENSMUSG00000035064	Eef2k	protein_coding	2	1	0.64156	0.00335626
ENSMUSG00000025060	Slk	protein_coding	2	1	0.674914	0.00452184
ENSMUSG00000055978	Fut2	protein_coding	2	1	0.66176	0.00496136
ENSMUSG00000030681	Mvp	protein_coding	2	1	0.707485	0.00556397
ENSMUSG00000021338	Lrrc16a	protein_coding	2	1	0.677106	0.00576031
ENSMUSG00000037815	Ctnna1	protein_coding	2	1	0.717194	0.00618081
ENSMUSG00000028382	Ptbp3	protein_coding	2	1	0.709677	0.00689846
ENSMUSG00000027605	Acss2	protein_coding	2	1	0.701065	0.00691025
ENSMUSG00000021131	Erh	protein_coding	2	1	0.692139	0.00697636
ENSMUSG00000052253	Zfp622	protein_coding	2	1	0.685249	0.00744056
ENSMUSG00000062300	Nectin2	protein_coding	2	1	0.67554	0.00774719
ENSMUSG00000027858	Tspan2	protein_coding	2	1	0.685249	0.00787541
ENSMUSG00000025950	Idh1	protein_coding	2	1	0.708738	0.00801837
ENSMUSG00000019866	Aim1	protein_coding	2	1	0.687441	0.00839358
ENSMUSG00000017188	Coa3	protein_coding	2	1	0.719386	0.00933232
ENSMUSG00000020122	Egfr	protein_coding	2	1	0.658785	0.0107053
ENSMUSG00000033542	Arhgef5	protein_coding	2	1	0.69762	0.0111029
ENSMUSG00000026628	Atf3	protein_coding	2	1	0.726589	0.0111955
ENSMUSG00000017756	Slc12a7	protein_coding	2	1	0.678672	0.011716
ENSMUSG00000040728	Esrp1	protein_coding	2	1	0.69621	0.0124204
ENSMUSG00000035649	Zcchc7	protein_coding	2	1	0.695584	0.013082
ENSMUSG00000027134	Lpcat4	protein_coding	2	1	0.682117	0.0141107
ENSMUSG00000066026	Dhrs3	protein_coding	2	1	0.712496	0.0145466
ENSMUSG00000027613	Eif6	protein_coding	2	1	0.691199	0.0148665
ENSMUSG00000021065	Fut8	protein_coding	2	1	0.687911	0.0161062
ENSMUSG00000021792	Fam213a	protein_coding	2	1	0.689634	0.0168038
ENSMUSG00000096215	Smim22	protein_coding	2	1	0.687598	0.0172622
ENSMUSG00000082319	Gm8822	processed_pseudogene	2	1	0.676793	0.0173429
ENSMUSG00000021118	Plek2	protein_coding	2	1	0.634043	0.0185437
ENSMUSG00000006373	Pgrmc1	protein_coding	2	1	0.680551	0.0196218
ENSMUSG00000106946	Gm42856	TEC	2	1	0.700908	0.0210437
ENSMUSG00000019889	Ptprk	protein_coding	2	1	0.700595	0.022333
ENSMUSG00000074978	Actg-ps1	processed_pseudogene	2	1	0.685562	0.0223568
ENSMUSG00000041625	Ggact	protein_coding	2	1	0.678202	0.0239305
ENSMUSG00000081603	Gm14681	processed_pseudogene	2	1	0.67006	0.0253979
ENSMUSG00000002010	Idh3g	protein_coding	2	1	0.685092	0.0268446
ENSMUSG00000014402	Tsg101	protein_coding	2	1	0.672095	0.0286363
ENSMUSG00000029762	Akr1b8	protein_coding	2	1	0.668337	0.0295276
ENSMUSG00000009291	Pttg1ip	protein_coding	2	1	0.715002	0.0310124
ENSMUSG00000078656	Vps25	protein_coding	2	1	0.673818	0.0313846
ENSMUSG00000027160	Ccdc34	protein_coding	2	1	0.68979	0.031839
ENSMUSG00000022035	Ccdc25	protein_coding	2	1	0.670373	0.0328592
ENSMUSG00000021577	Sdha	protein_coding	2	1	0.710617	0.0331142
ENSMUSG00000046865	Fbl	protein_coding	2	1	0.665362	0.0344119
ENSMUSG00000040659	Efhd2	protein_coding	2	1	0.708425	0.0355003
ENSMUSG00000054387	Mdm4	protein_coding	2	1	0.678672	0.0358334
ENSMUSG00000026575	Nme7	protein_coding	2	1	0.670216	0.0364257
ENSMUSG00000005125	Ndrg1	protein_coding	2	1	0.671312	0.0387747
ENSMUSG00000006519	Cyba	protein_coding	2	1	0.662073	0.0394652
ENSMUSG00000034101	Ctnnd1	protein_coding	2	1	0.700282	0.0412783
ENSMUSG00000039753	Fbxl5	protein_coding	2	1	0.713122	0.0413414
ENSMUSG00000026965	Anapc2	protein_coding	2	1	0.663013	0.0441876
ENSMUSG00000020708	Psmc5	protein_coding	2	1	0.697307	0.0442835
ENSMUSG00000060427	Zfp868	protein_coding	2	1	0.681178	0.0444282
ENSMUSG00000025393	Atp5b	protein_coding	2	1	0.668024	0.0447041
ENSMUSG00000018677	Slc25a39	protein_coding	2	1	0.712496	0.0454064
ENSMUSG00000038764	Ptpn3	protein_coding	2	1	0.645944	0.0454636
ENSMUSG00000024735	Prpf19	protein_coding	2	1	0.692452	0.0456991
ENSMUSG00000020484	Xbp1	protein_coding	2	1	0.695897	0.0481201
ENSMUSG00000058056	Palld	protein_coding	2	1	0.64704	0.0507313
ENSMUSG00000020737	Hn1	protein_coding	2	1	0.708425	0.0582323
ENSMUSG00000052726	Kcnt2	protein_coding	2	1	0.664422	0.0582323
ENSMUSG00000002416	Ndufb2	protein_coding	2	1	0.685719	0.0595706
ENSMUSG00000033955	Tnks1bp1	protein_coding	2	1	0.709834	0.0606156
ENSMUSG00000021764	Ndufs4	protein_coding	2	1	0.718133	0.0617362
ENSMUSG00000048277	Syngr2	protein_coding	2	1	0.649546	0.0624037
ENSMUSG00000038295	Atg9b	protein_coding	2	1	0.644692	0.0656353
ENSMUSG00000069539	Scyl2	protein_coding	2	1	0.650172	0.067246
ENSMUSG00000026566	Mpzl1	protein_coding	2	1	0.687285	0.072405
ENSMUSG00000027506	Tpd52	protein_coding	2	1	0.691199	0.0758048
ENSMUSG00000054951	9130008F23Rik	protein_coding	2	1	0.666771	0.0760077
ENSMUSG00000083061	Gm12191	processed_pseudogene	2	1	0.701221	0.0799844
ENSMUSG00000004568	Arhgef18	protein_coding	2	1	0.668807	0.0801888
ENSMUSG00000006445	Epha2	protein_coding	2	1	0.690886	0.0895857
ENSMUSG00000037415	Ranbp10	protein_coding	2	1	0.673974	0.0895873
ENSMUSG00000030850	Ate1	protein_coding	2	1	0.689634	0.0906499
ENSMUSG00000001082	Mfsd10	protein_coding	2	1	0.679455	0.092345
ENSMUSG00000024782	Ak3	protein_coding	2	1	0.699499	0.098366
ENSMUSG00000056413	Adap1	protein_coding	2	1	0.633573	0.0991521
ENSMUSG00000035399	Oser1	protein_coding	2	1	0.710617	0.0991563
ENSMUSG00000023967	Mrps18a	protein_coding	2	1	0.681178	0.10076
ENSMUSG00000036019	Tmtc2	protein_coding	2	1	0.643282	0.101285
ENSMUSG00000026035	Ppil3	protein_coding	2	1	0.660507	0.103721
ENSMUSG00000070319	Eif3g	protein_coding	2	1	0.672722	0.10405
ENSMUSG00000053819	Camk2d	protein_coding	2	1	0.667711	0.109809
ENSMUSG00000007476	Lrrc8a	protein_coding	2	1	0.650799	0.109874
ENSMUSG00000028412	Slc44a1	protein_coding	2	1	0.678046	0.110902
ENSMUSG00000032860	P2ry2	protein_coding	2	1	0.61901	0.112014
ENSMUSG00000059149	Mfsd4a	protein_coding	2	1	0.69715	0.119251
ENSMUSG00000042225	Ammecr1	protein_coding	2	1	0.690886	0.124794
ENSMUSG00000023944	Hsp90ab1	protein_coding	2	1	0.669277	0.127134
ENSMUSG00000036617	Etl4	protein_coding	2	1	0.692296	0.127728
ENSMUSG00000031075	Ano1	protein_coding	2	1	0.662073	0.132021
ENSMUSG00000050565	Tor1aip2	protein_coding	2	1	0.69073	0.139966
ENSMUSG00000031353	Rbbp7	protein_coding	2	1	0.67006	0.150514
ENSMUSG00000029723	Tsc22d4	protein_coding	2	1	0.68243	0.153874
ENSMUSG00000007656	Arpp19	protein_coding	2	1	0.663013	0.154365
ENSMUSG00000019179	Mdh2	protein_coding	2	1	0.649546	0.174527
ENSMUSG00000020669	Sh3yl1	protein_coding	2	1	0.66959	0.177265
ENSMUSG00000005447	Pafah1b3	protein_coding	2	1	0.696524	0.181703
ENSMUSG00000008348	Ubc	protein_coding	2	1	0.66959	0.188347
ENSMUSG00000063354	Slc39a4	protein_coding	2	1	0.721892	0.196387
ENSMUSG00000106558	Gm5552	processed_pseudogene	2	1	0.703883	0.196748
ENSMUSG00000032294	Pkm	protein_coding	2	1	0.698403	0.19708
ENSMUSG00000026991	Pkp4	protein_coding	2	1	0.702474	0.199133
ENSMUSG00000052337	Immt	protein_coding	2	1	0.682117	0.199863
ENSMUSG00000027580	Helz2	protein_coding	2	1	0.692139	0.204704
ENSMUSG00000027406	Idh3b	protein_coding	2	1	0.710617	0.210896
ENSMUSG00000021876	Rnase4	protein_coding	2	1	0.660507	0.211202
ENSMUSG00000047187	Rab2a	protein_coding	2	1	0.658002	0.211539
ENSMUSG00000028830	AU040320	protein_coding	2	1	0.699969	0.213755
ENSMUSG00000021636	Marveld2	protein_coding	2	1	0.673348	0.220456
ENSMUSG00000033735	Spr	protein_coding	2	1	0.681647	0.220505
ENSMUSG00000065979	Cpped1	protein_coding	2	1	0.649702	0.228158
ENSMUSG00000032393	Dpp8	protein_coding	2	1	0.645944	0.229617
ENSMUSG00000041688	Amot	protein_coding	2	1	0.658472	0.230652
ENSMUSG00000014867	Surf4	protein_coding	2	1	0.710304	0.230975
ENSMUSG00000083396	Gm15542	processed_pseudogene	2	1	0.667084	0.234833
ENSMUSG00000047731	Wbp1l	protein_coding	2	1	0.687128	0.235954
ENSMUSG00000004317	Clcn5	protein_coding	2	1	0.679612	0.238646
ENSMUSG00000020736	Nt5c	protein_coding	2	1	0.69809	0.240794
ENSMUSG00000025240	Sacm1l	protein_coding	2	1	0.668024	0.256319
ENSMUSG00000058690	Ccser2	protein_coding	2	1	0.649702	0.272159
ENSMUSG00000074445	Sprr2a3	protein_coding	2	1	0.63279	0.275106
ENSMUSG00000021696	Elovl7	protein_coding	2	1	0.659098	0.289687
ENSMUSG00000029149	Krtcap3	protein_coding	2	1	0.646101	0.293172
ENSMUSG00000063412	Gm10131	protein_coding	2	1	0.660821	0.294552
ENSMUSG00000082998	Gm11221	processed_pseudogene	2	1	0.623395	0.300653
ENSMUSG00000102433	Gm38050	unprocessed_pseudogene	2	1	0.620263	0.301592
ENSMUSG00000061838	Suclg2	protein_coding	2	1	0.633104	0.308368
ENSMUSG00000072620	Slfn2	protein_coding	2	1	0.64156	0.317752
ENSMUSG00000029319	Coq2	protein_coding	2	1	0.641873	0.317878
ENSMUSG00000027710	Acad9	protein_coding	2	1	0.629502	0.325785
ENSMUSG00000034252	Senp6	protein_coding	2	1	0.674914	0.326798
ENSMUSG00000027940	Tpm3	protein_coding	2	1	0.707172	0.33972
ENSMUSG00000031897	Psmb10	protein_coding	2	1	0.628093	0.344614
ENSMUSG00000038024	Dennd4c	protein_coding	2	1	0.634513	0.345878
ENSMUSG00000056836	Gm6851	processed_pseudogene	2	1	0.699655	0.346068
ENSMUSG00000020423	Btg2	protein_coding	2	1	0.658628	0.364932
ENSMUSG00000027332	Ivd	protein_coding	2	1	0.624804	0.370971
ENSMUSG00000039428	Tmem135	protein_coding	2	1	0.644222	0.380368
ENSMUSG00000022204	Ngdn	protein_coding	2	1	0.669903	0.383173
ENSMUSG00000002812	Flii	protein_coding	2	1	0.682274	0.390287
ENSMUSG00000002393	Nr2f6	protein_coding	2	1	0.665518	0.391198
ENSMUSG00000038462	Uqcrfs1	protein_coding	2	1	0.660507	0.394808
ENSMUSG00000028639	Ybx1	protein_coding	2	1	0.656749	0.398682
ENSMUSG00000031320	Rps4x	protein_coding	2	1	0.71782	0.399758
ENSMUSG00000021149	Gtpbp4	protein_coding	2	1	0.670999	0.399822
ENSMUSG00000071551	Akr1c19	protein_coding	2	1	0.667084	0.401634
ENSMUSG00000025246	Tbl1x	protein_coding	2	1	0.696837	0.404469
ENSMUSG00000002102	Psmc3	protein_coding	2	1	0.68243	0.413142
ENSMUSG00000024841	Eif1ad	protein_coding	2	1	0.645318	0.418813
ENSMUSG00000040774	Cept1	protein_coding	2	1	0.674914	0.427095
ENSMUSG00000022789	Dnm1l	protein_coding	2	1	0.677576	0.428093
ENSMUSG00000031938	4931406C07Rik	protein_coding	2	1	0.690103	0.430831
ENSMUSG00000027007	Ssfa2	protein_coding	2	1	0.686189	0.434678
ENSMUSG00000107390	Gm43323	TEC	2	1	0.64015	0.440945
ENSMUSG00000046761	Fam83h	protein_coding	2	1	0.6544	0.452704
ENSMUSG00000041607	Mbp	protein_coding	2	1	0.654087	0.456186
ENSMUSG00000029048	Rer1	protein_coding	2	1	0.677419	0.458903
ENSMUSG00000055723	Rras2	protein_coding	2	1	0.658002	0.470704
ENSMUSG00000063895	Nupl1	protein_coding	2	1	0.624804	0.472002
ENSMUSG00000041671	Pyroxd1	protein_coding	2	1	0.674601	0.478464
ENSMUSG00000042349	Ikbke	protein_coding	2	1	0.682274	0.478603
ENSMUSG00000058407	Txndc9	protein_coding	2	1	0.664579	0.478661
ENSMUSG00000026860	Sh3glb2	protein_coding	2	1	0.679298	0.490709
ENSMUSG00000079941	Gm11273	protein_coding	2	1	0.71829	0.490709
ENSMUSG00000028099	Polr3c	protein_coding	2	1	0.667867	0.494179
ENSMUSG00000078652	Psme3	protein_coding	2	1	0.700752	0.504561
ENSMUSG00000082361	Btc	protein_coding	2	1	0.6544	0.504818
ENSMUSG00000032959	Pebp1	protein_coding	2	1	0.701848	0.507994
ENSMUSG00000006932	Ctnnb1	protein_coding	2	1	0.688381	0.509625
ENSMUSG00000023904	Hcfc1r1	protein_coding	2	1	0.652208	0.526167
ENSMUSG00000035473	Galm	protein_coding	2	1	0.668024	0.526945
ENSMUSG00000027957	Slc35a3	protein_coding	2	1	0.707172	0.53417
ENSMUSG00000032202	Rab27a	protein_coding	2	1	0.592546	0.543132
ENSMUSG00000031381	Piga	protein_coding	2	1	0.667554	0.555121
ENSMUSG00000036023	Parp2	protein_coding	2	1	0.653617	0.556415
ENSMUSG00000008136	Fhl2	protein_coding	2	1	0.664109	0.557967
ENSMUSG00000032413	Rasa2	protein_coding	2	1	0.672095	0.562056
ENSMUSG00000028719	Cmpk1	protein_coding	2	1	0.725023	0.563427
ENSMUSG00000095690	Rab11b-ps2	processed_pseudogene	2	1	0.679455	0.569481
ENSMUSG00000031029	Eif3f	protein_coding	2	1	0.680708	0.573946
ENSMUSG00000039050	Osbpl2	protein_coding	2	1	0.684936	0.582235
ENSMUSG00000104699	Rps4x-ps	processed_pseudogene	2	1	0.694645	0.596185
ENSMUSG00000072704	Smim10l1	protein_coding	2	1	0.684309	0.596265
ENSMUSG00000038628	Polr3k	protein_coding	2	1	0.641873	0.608376
ENSMUSG00000015467	Egfl8	protein_coding	2	1	0.670686	0.628833
ENSMUSG00000037400	Atp11b	protein_coding	2	1	0.706546	0.62965
ENSMUSG00000063362	Alg11	protein_coding	2	1	0.694488	0.631226
ENSMUSG00000040498	Igsf23	protein_coding	2	1	0.624178	0.633045
ENSMUSG00000062202	Btbd9	protein_coding	2	1	0.693862	0.633589
ENSMUSG00000080977	Gm13772	processed_pseudogene	2	1	0.644222	0.644792
ENSMUSG00000042694	Obfc1	protein_coding	2	1	0.674601	0.644987
ENSMUSG00000020265	Sumo3	protein_coding	2	1	0.706702	0.657852
ENSMUSG00000042202	Slc35e2	protein_coding	2	1	0.699342	0.677551
ENSMUSG00000039114	Nrn1	protein_coding	2	1	0.663483	0.679991
ENSMUSG00000016833	Mrps18c	protein_coding	2	1	0.643909	0.690778
ENSMUSG00000002307	Daxx	protein_coding	2	1	0.662856	0.692729
ENSMUSG00000021039	Snw1	protein_coding	2	1	0.657062	0.692729
ENSMUSG00000021023	1110008L16Rik	protein_coding	2	1	0.68337	0.717625
ENSMUSG00000046108	Il17c	protein_coding	2	1	0.595835	0.723186
ENSMUSG00000031930	Wwp2	protein_coding	2	1	0.609458	0.779127
ENSMUSG00000029201	Ugdh	protein_coding	2	1	0.711087	0.78095
ENSMUSG00000035248	Zcchc6	protein_coding	2	1	0.720952	0.783737
ENSMUSG00000032621	Srek1	protein_coding	2	1	0.706546	0.799799
ENSMUSG00000082193	Rpl5-ps1	processed_pseudogene	2	1	0.708425	0.803618
ENSMUSG00000028496	Mllt3	protein_coding	2	1	0.706859	0.812801
ENSMUSG00000014329	Bicc1	protein_coding	2	1	0.672408	0.818955
ENSMUSG00000030512	Snrpa1	protein_coding	2	1	0.674914	0.826669
ENSMUSG00000034109	Golim4	protein_coding	2	1	0.683683	0.828488
ENSMUSG00000032376	Usp3	protein_coding	2	1	0.709364	0.837956
ENSMUSG00000063902	Gm7964	processed_pseudogene	2	1	0.684153	0.838674
ENSMUSG00000052632	Asap2	protein_coding	2	1	0.643595	0.853666
ENSMUSG00000003072	Atp5d	protein_coding	2	1	0.714688	0.858446
ENSMUSG00000021866	Anxa11	protein_coding	2	1	0.659255	0.866526
ENSMUSG00000018143	Mafk	protein_coding	2	1	0.700752	0.874269
ENSMUSG00000030824	Nucb1	protein_coding	2	1	0.715628	0.883536
ENSMUSG00000026427	Eif2d	protein_coding	2	1	0.686189	0.888927
ENSMUSG00000005779	Psmb4	protein_coding	2	1	0.669277	0.897142
ENSMUSG00000035441	Myo1d	protein_coding	2	1	0.631225	0.905636
ENSMUSG00000031403	Dkc1	protein_coding	2	1	0.62778	0.91093
ENSMUSG00000046447	Camk2n1	protein_coding	2	1	0.632008	0.920133
ENSMUSG00000026245	Farsb	protein_coding	2	1	0.69762	0.922171
ENSMUSG00000022336	Eif3e	protein_coding	2	1	0.644222	0.928269
ENSMUSG00000037958	Nsrp1	protein_coding	2	1	0.687754	0.932906
ENSMUSG00000040282	BC052040	protein_coding	2	1	0.599749	0.936238
ENSMUSG00000062312	Erbb2	protein_coding	2	1	0.703257	0.939023
ENSMUSG00000022952	Runx1	protein_coding	2	1	0.652208	0.943658
ENSMUSG00000027099	Mtx2	protein_coding	2	1	0.66865	0.953571
ENSMUSG00000018171	Vmp1	protein_coding	2	1	0.653304	0.954842
ENSMUSG00000025733	Rhot2	protein_coding	2	1	0.644065	0.956008
ENSMUSG00000040746	Rnf167	protein_coding	2	1	0.652678	0.958301
ENSMUSG00000025428	Atp5a1	protein_coding	2	1	0.639211	0.978484
ENSMUSG00000022550	Adck5	protein_coding	2	1	0.629502	0.978572
ENSMUSG00000002250	Ppard	protein_coding	2	1	0.647823	0.981111
ENSMUSG00000000001	Gnai3	protein_coding	2	1	0.540871	1
ENSMUSG00000000159	Igsf5	protein_coding	2	1	0.672408	1
ENSMUSG00000000168	Dlat	protein_coding	2	1	0.560758	1
ENSMUSG00000000194	Gpr107	protein_coding	2	1	0.531475	1
ENSMUSG00000000276	Dgke	protein_coding	2	1	0.562167	1
ENSMUSG00000000282	Mnt	protein_coding	2	1	0.521453	1
ENSMUSG00000000295	Hddc2	protein_coding	2	1	0.633417	1
ENSMUSG00000000339	Rtca	protein_coding	2	1	0.582211	1
ENSMUSG00000000340	Dbt	protein_coding	2	1	0.566395	1
ENSMUSG00000000355	Mcts1	protein_coding	2	1	0.654713	1
ENSMUSG00000000374	Trappc10	protein_coding	2	1	0.605387	1
ENSMUSG00000000384	Tbrg4	protein_coding	2	1	0.624334	1
ENSMUSG00000000399	Ndufa9	protein_coding	2	1	0.660507	1
ENSMUSG00000000420	Galnt1	protein_coding	2	1	0.661447	1
ENSMUSG00000000439	Mkrn2	protein_coding	2	1	0.623708	1
ENSMUSG00000000532	Acvr1b	protein_coding	2	1	0.591763	1
ENSMUSG00000000581	C1d	protein_coding	2	1	0.675227	1
ENSMUSG00000000631	Myo18a	protein_coding	2	1	0.689007	1
ENSMUSG00000000708	Kat2b	protein_coding	2	1	0.609302	1
ENSMUSG00000000711	Rab5b	protein_coding	2	1	0.571093	1
ENSMUSG00000000738	Spg7	protein_coding	2	1	0.685249	1
ENSMUSG00000000743	Chmp1a	protein_coding	2	1	0.607109	1
ENSMUSG00000000776	Polr3d	protein_coding	2	1	0.57767	1
ENSMUSG00000000782	Tcf7	protein_coding	2	1	0.546508	1
ENSMUSG00000000804	Usp32	protein_coding	2	1	0.562011	1
ENSMUSG00000000823	Zfp512b	protein_coding	2	1	0.551206	1
ENSMUSG00000000826	Dnajc5	protein_coding	2	1	0.665832	1
[truncated: 8,245 more rows]

## Sheet: C1 vs C2
EnsemblGeneID	AssociatedGeneName	Genetype	lb	mle	ub	ce	Z	cZ	adjP
ENSMUSG00000069516	Lyz2	protein_coding	5.47288	10.991	12.0313	5.47288	7.16081	6.40843	1.47028e-10
ENSMUSG00000002944	Cd36	protein_coding	9.67931	10.5387	11.3076	9.67931	7.16081	6.40843	1.47028e-10
ENSMUSG00000029375	Cxcl15	protein_coding	8.05101	10.4482	11.0814	8.05101	7.16081	6.40843	1.47028e-10
ENSMUSG00000050953	Gja1	protein_coding	8.95562	10.2673	10.9458	8.95562	7.16081	6.40843	1.47028e-10
ENSMUSG00000029188	Slc34a2	protein_coding	5.69903	10.1768	10.8101	5.69903	7.16081	6.40843	1.47028e-10
ENSMUSG00000036594	H2-Aa	protein_coding	3.70889	9.99592	10.5839	3.70889	7.16081	6.40843	1.47028e-10
ENSMUSG00000041247	Lamp3	protein_coding	8.36762	9.67931	10.2673	8.36762	7.16081	6.40843	1.47028e-10
ENSMUSG00000002204	Napsa	protein_coding	8.41285	9.54361	10.1768	8.41285	7.16081	6.40843	1.47028e-10
ENSMUSG00000020057	Dram1	protein_coding	8.41285	9.36269	9.95069	8.41285	7.16081	6.40843	1.47028e-10
ENSMUSG00000056370	Sftpb	protein_coding	8.50332	9.36269	9.90546	8.50332	7.16081	6.40843	1.47028e-10
ENSMUSG00000086503	Xist	lincRNA	7.05594	9.227	9.95069	7.05594	6.83364	6.10247	1.04444e-09
ENSMUSG00000040152	Thbs1	protein_coding	2.39721	9.04608	9.815	2.39721	5.48968	4.76374	1.90036e-06
ENSMUSG00000030218	Mgp	protein_coding	6.73933	8.86516	9.72454	6.73933	7.13028	6.39822	1.57194e-10
ENSMUSG00000052974	Cyp2f2	protein_coding	8.00578	8.81993	9.45315	8.00578	7.16081	6.40843	1.47028e-10
ENSMUSG00000106957	Gm43085	TEC	7.68917	8.81993	9.67931	7.68917	7.16022	6.40843	1.47028e-10
ENSMUSG00000040809	Chil3	protein_coding	5.0658	8.81993	11.3076	5.0658	5.61672	4.88731	1.02223e-06
ENSMUSG00000018593	Sparc	protein_coding	7.87009	8.72947	9.36269	7.87009	7.16081	6.40843	1.47028e-10
ENSMUSG00000015452	Ager	protein_coding	7.32732	8.63901	9.31746	7.32732	7.16074	6.40843	1.47028e-10
ENSMUSG00000026600	Soat1	protein_coding	6.28703	8.63901	9.227	6.28703	7.1606	6.40843	1.47028e-10
ENSMUSG00000032487	Ptgs2	protein_coding	7.01071	8.54855	9.36269	7.01071	7.15362	6.40843	1.47028e-10
ENSMUSG00000025150	Cbr2	protein_coding	7.50825	8.50332	9.31746	7.50825	7.16078	6.40843	1.47028e-10
ENSMUSG00000031207	Msn	protein_coding	7.77963	8.50332	9.09131	7.77963	7.16081	6.40843	1.47028e-10
ENSMUSG00000090509	Sfta2	protein_coding	7.28209	8.50332	9.13654	7.28209	7.15861	6.40843	1.47028e-10
ENSMUSG00000032554	Trf	protein_coding	6.28703	8.50332	9.49838	6.28703	6.10014	5.38258	7.34277e-08
ENSMUSG00000024538	Ppic	protein_coding	7.55348	8.41285	9.13654	7.55348	7.16077	6.40843	1.47028e-10
ENSMUSG00000100131	Gm28439	unprocessed_pseudogene	6.64887	8.41285	9.40792	6.64887	6.02588	5.31195	1.0846e-07
ENSMUSG00000025746	Il6	protein_coding	5.0658	8.41285	9.86023	5.0658	4.40874	3.68146	0.000231907
ENSMUSG00000021608	Lpcat1	protein_coding	6.55841	8.32239	8.91039	6.55841	7.1534	6.40843	1.47028e-10
ENSMUSG00000020077	Srgn	protein_coding	7.05594	8.32239	9.40792	7.05594	6.90871	6.17778	6.50077e-10
ENSMUSG00000040747	Cd53	protein_coding	6.51318	8.27716	9.36269	6.51318	7.11617	6.38799	1.68079e-10
ENSMUSG00000032640	Chsy1	protein_coding	7.19163	8.27716	9.00085	7.19163	6.8326	6.10247	1.04444e-09
ENSMUSG00000029377	Ereg	protein_coding	5.69903	8.27716	9.27223	5.69903	5.17781	4.46368	8.0563e-06
ENSMUSG00000000402	Egfl6	protein_coding	2.98521	8.23193	8.81993	2.98521	5.38823	4.66477	3.08959e-06
ENSMUSG00000020044	Timp3	protein_coding	7.19163	8.1867	9.31746	7.19163	7.16049	6.40843	1.47028e-10
ENSMUSG00000006356	Crip2	protein_coding	2.35198	8.1867	8.68424	2.35198	5.47928	4.75332	2.00103e-06
ENSMUSG00000032827	Ppp1r9a	protein_coding	4.38735	8.14147	8.81993	4.38735	6.09252	5.37495	7.66052e-08
ENSMUSG00000060586	H2-Eb1	protein_coding	1.80922	8.14147	8.81993	1.80922	5.12384	4.41214	1.02352e-05
ENSMUSG00000021728	Emb	protein_coding	7.19163	8.09624	9.00085	7.19163	7.16059	6.40843	1.47028e-10
ENSMUSG00000079018	Ly6c1	protein_coding	3.5732	8.09624	8.68424	3.5732	5.45581	4.73296	2.21265e-06
ENSMUSG00000030849	Fgfr2	protein_coding	6.82979	8.05101	8.72947	6.82979	6.99998	6.26939	3.62468e-10
ENSMUSG00000015093	Clic3	protein_coding	6.37749	8.05101	8.81993	6.37749	6.46813	5.75252	8.79253e-09
ENSMUSG00000013089	Etv5	protein_coding	6.28703	8.05101	8.68424	6.28703	6.05323	5.33584	9.5104e-08
ENSMUSG00000054720	Lrrc8c	protein_coding	7.01071	8.00578	8.72947	7.01071	7.15394	6.40843	1.47028e-10
ENSMUSG00000030934	Oat	protein_coding	6.6941	8.00578	8.63901	6.6941	7.01666	6.28622	3.25279e-10
ENSMUSG00000022018	Rgcc	protein_coding	6.87502	7.91532	8.59378	6.87502	7.0639	6.33698	2.34312e-10
ENSMUSG00000024130	Abca3	protein_coding	2.75905	7.91532	8.50332	2.75905	5.15434	4.44221	8.90404e-06
ENSMUSG00000031659	Adcy7	protein_coding	6.82979	7.87009	8.54855	6.82979	6.9676	6.2384	4.42063e-10
ENSMUSG00000055653	Gpc3	protein_coding	6.6941	7.82486	8.59378	6.6941	6.63881	5.92134	3.19324e-09
ENSMUSG00000031502	Col4a1	protein_coding	6.6941	7.82486	8.54855	6.6941	6.38786	5.67172	1.4137e-08
ENSMUSG00000031375	Bgn	protein_coding	1.35691	7.82486	8.54855	1.35691	3.45953	2.68748	0.00719932
ENSMUSG00000041390	Mdfic	protein_coding	6.64887	7.77963	8.68424	6.64887	6.33285	5.61662	1.94726e-08
ENSMUSG00000028341	Nr4a3	protein_coding	6.37749	7.77963	8.72947	6.37749	5.25577	4.53918	5.64734e-06
ENSMUSG00000038872	Zfhx3	protein_coding	2.75905	7.77963	8.50332	2.75905	5.16987	4.45583	8.35689e-06
ENSMUSG00000022816	Fstl1	protein_coding	2.39721	7.77963	8.95562	2.39721	2.80771	2.01727	0.0436677
ENSMUSG00000022964	Tmem50b	protein_coding	6.60364	7.7344	8.41285	6.60364	6.24237	5.52665	3.26408e-08
ENSMUSG00000022661	Cd200	protein_coding	4.52304	7.7344	8.45809	4.52304	5.93908	5.21851	1.80368e-07
ENSMUSG00000097451	Rian	processed_transcript	6.2418	7.7344	8.63901	6.2418	5.90251	5.1851	2.15898e-07
ENSMUSG00000044033	Ccdc141	protein_coding	4.43258	7.7344	8.50332	4.43258	5.36067	4.64133	3.46171e-06
ENSMUSG00000032050	Rdx	protein_coding	2.39721	7.7344	8.45809	2.39721	4.10952	3.37236	0.000745262
ENSMUSG00000054986	Sec14l3	protein_coding	6.51318	7.68917	8.72947	6.51318	6.73914	6.01727	1.77379e-09
ENSMUSG00000026249	Serpine2	protein_coding	6.2418	7.68917	8.41285	6.2418	5.58178	4.85531	1.20197e-06
ENSMUSG00000028583	Pdpn	protein_coding	3.16613	7.68917	8.36762	3.16613	4.54202	3.81825	0.000134402
ENSMUSG00000049001	Ndnf	protein_coding	1.22122	7.68917	8.36762	1.22122	3.19214	2.41807	0.0156029
ENSMUSG00000011256	Adam19	protein_coding	6.64887	7.64394	8.41285	6.64887	6.71179	5.99071	2.08924e-09
ENSMUSG00000065954	Tacc1	protein_coding	3.07567	7.64394	8.32239	3.07567	5.02025	4.31067	1.62758e-05
ENSMUSG00000060935	Tmem263	protein_coding	1.26645	7.64394	8.54855	1.26645	3.42308	2.65303	0.00797736
ENSMUSG00000022097	Sftpc	protein_coding	6.78456	7.59871	8.41285	6.78456	7.16081	6.40843	1.47028e-10
ENSMUSG00000029761	Cald1	protein_coding	4.34212	7.59871	8.45809	4.34212	5.05084	4.33992	1.42534e-05
ENSMUSG00000028024	Enpep	protein_coding	6.42272	7.55348	8.27716	6.42272	6.97795	6.24826	4.15062e-10
ENSMUSG00000002107	Celf2	protein_coding	6.28703	7.55348	8.27716	6.28703	5.59785	4.87032	1.11415e-06
ENSMUSG00000039115	Itga9	protein_coding	6.64887	7.50825	8.09624	6.64887	7.11392	6.38727	1.68875e-10
ENSMUSG00000052512	Nav2	protein_coding	6.37749	7.50825	8.09624	6.37749	6.33133	5.61599	1.9544e-08
ENSMUSG00000036943	Rab8b	protein_coding	6.06087	7.50825	8.45809	6.06087	6.30071	5.58483	2.3393e-08
ENSMUSG00000049690	Nckap5	protein_coding	5.83472	7.50825	8.23193	5.83472	5.49962	4.77215	1.82271e-06
ENSMUSG00000021268	Meg3	lincRNA	5.78949	7.50825	8.41285	5.78949	5.18287	4.46672	7.94273e-06
ENSMUSG00000069515	Lyz1	protein_coding	5.78949	7.50825	8.50332	5.78949	5.16413	4.45091	8.55061e-06
ENSMUSG00000029309	Sparcl1	protein_coding	5.42765	7.50825	8.81993	5.42765	4.94643	4.23562	2.2792e-05
ENSMUSG00000033917	Gde1	protein_coding	2.03537	7.50825	8.1867	2.03537	4.35674	3.62539	0.000288525
ENSMUSG00000024164	C3	protein_coding	1.26645	7.50825	8.1867	1.26645	3.51075	2.73987	0.00614626
ENSMUSG00000026395	Ptprc	protein_coding	6.1061	7.46302	8.7747	6.1061	6.80739	6.08625	1.15587e-09
ENSMUSG00000085715	Tsix	antisense	6.33226	7.46302	8.27716	6.33226	6.30069	5.58483	2.3393e-08
ENSMUSG00000026826	Nr4a2	protein_coding	3.93504	7.46302	8.45809	3.93504	5.11587	4.40525	1.0566e-05
ENSMUSG00000021835	Bmp4	protein_coding	1.62829	7.46302	8.05101	1.62829	3.75858	3.0024	0.00267861
ENSMUSG00000036533	Cdc42ep3	protein_coding	6.33226	7.41779	8.23193	6.33226	6.6775	5.95801	2.55322e-09
ENSMUSG00000053580	Tanc2	protein_coding	5.33719	7.41779	8.36762	5.33719	5.92901	5.20803	1.90857e-07
ENSMUSG00000026874	Hc	protein_coding	6.01564	7.41779	8.50332	6.01564	5.76133	5.03626	4.74706e-07
ENSMUSG00000027820	Mme	protein_coding	5.92518	7.41779	8.1867	5.92518	4.88148	4.17137	3.02772e-05
ENSMUSG00000053897	Slc39a8	protein_coding	3.66366	7.41779	8.09624	3.66366	4.64905	3.93357	8.36949e-05
ENSMUSG00000038344	Txlng	protein_coding	0.723686	7.41779	8.09624	0.723686	2.70132	1.90791	0.0564031
ENSMUSG00000031503	Col4a2	protein_coding	6.28703	7.37256	8.27716	6.28703	6.5926	5.87606	4.20141e-09
ENSMUSG00000040147	Maob	protein_coding	6.01564	7.37256	8.14147	6.01564	6.54607	5.82779	5.61648e-09
ENSMUSG00000026728	Vim	protein_coding	5.92518	7.37256	8.27716	5.92518	6.52538	5.8071	6.3563e-09
ENSMUSG00000030102	Itpr1	protein_coding	3.93504	7.37256	8.14147	3.93504	4.70748	3.99709	6.41267e-05
ENSMUSG00000055322	Tns1	protein_coding	1.80922	7.37256	7.96055	1.80922	3.90776	3.15652	0.00159662
ENSMUSG00000027797	Dclk1	protein_coding	5.42765	7.37256	8.1867	5.42765	3.88883	3.13519	0.00171743
ENSMUSG00000047250	Ptgs1	protein_coding	6.2418	7.32732	8.14147	6.2418	6.20366	5.48824	4.05969e-08
ENSMUSG00000017002	Slpi	protein_coding	6.01564	7.32732	8.32239	6.01564	5.68118	4.95346	7.29058e-07
ENSMUSG00000020120	Plek	protein_coding	4.52304	7.32732	8.36762	4.52304	5.47109	4.74542	2.08075e-06
ENSMUSG00000018340	Anxa6	protein_coding	5.2015	7.32732	8.05101	5.2015	5.182	4.46672	7.94273e-06
ENSMUSG00000063889	Crem	protein_coding	2.57813	7.32732	8.1867	2.57813	4.6242	3.90692	9.34798e-05
ENSMUSG00000004665	Cnn2	protein_coding	1.13076	7.32732	8.1867	1.13076	3.35482	2.58458	0.00974971
ENSMUSG00000036256	Igfbp7	protein_coding	6.33226	7.28209	7.96055	6.33226	6.83944	6.10698	1.01533e-09
ENSMUSG00000020053	Igf1	protein_coding	4.74919	7.28209	8.91039	4.74919	5.84607	5.12725	2.93999e-07
ENSMUSG00000036273	Lrrk2	protein_coding	5.56334	7.28209	8.14147	5.56334	5.27844	4.56051	5.10297e-06
ENSMUSG00000079547	H2-DMb1	protein_coding	5.97041	7.28209	7.96055	5.97041	5.04594	4.33647	1.44792e-05
ENSMUSG00000026832	Cytip	protein_coding	2.62336	7.28209	8.14147	2.62336	4.092	3.35385	0.000796966
ENSMUSG00000035000	Dpp4	protein_coding	1.4926	7.28209	7.96055	1.4926	3.38928	2.61798	0.00884517
ENSMUSG00000041483	Zfp281	protein_coding	0.542765	7.28209	8.09624	0.542765	2.51803	1.72347	0.0848043
ENSMUSG00000037940	Inpp4b	protein_coding	6.1061	7.23686	8.23193	6.1061	6.83025	6.10138	1.05159e-09
ENSMUSG00000029522	Pla2g1b	protein_coding	5.97041	7.23686	7.96055	5.97041	5.92375	5.20338	1.95699e-07
ENSMUSG00000086429	Gt(ROSA)26Sor	antisense	1.67352	7.23686	7.91532	1.67352	4.01182	3.26579	0.0010916
ENSMUSG00000026070	Il18r1	protein_coding	2.12583	7.23686	7.91532	2.12583	3.90247	3.15051	0.00162983
ENSMUSG00000089929	Bcl2a1b	protein_coding	6.06087	7.19163	8.32239	6.06087	6.81159	6.08804	1.14302e-09
ENSMUSG00000033595	Lgi3	protein_coding	5.87995	7.19163	7.87009	5.87995	6.49611	5.77975	7.48119e-09
ENSMUSG00000040693	Slco4c1	protein_coding	6.1061	7.19163	8.23193	6.1061	6.22848	5.51309	3.5258e-08
ENSMUSG00000018927	Ccl6	protein_coding	5.33719	7.19163	8.7747	5.33719	5.58385	4.8569	1.1924e-06
ENSMUSG00000032035	Ets1	protein_coding	5.38242	7.19163	8.05101	5.38242	5.45608	4.73296	2.21265e-06
ENSMUSG00000026193	Fn1	protein_coding	2.12583	7.19163	8.14147	2.12583	3.55088	2.78245	0.0053951
ENSMUSG00000045827	Serpinb9	protein_coding	1.0403	7.19163	8.00578	1.0403	3.01783	2.233	0.0255492
ENSMUSG00000020677	Ddx52	protein_coding	0.271382	7.19163	7.96055	0.271382	2.2437	1.44576	0.148244
ENSMUSG00000015396	Cd83	protein_coding	5.92518	7.1464	8.23193	5.92518	6.67478	5.95629	2.5803e-09
ENSMUSG00000026012	Cd28	protein_coding	5.6538	7.1464	8.1867	5.6538	6.36871	5.65263	1.58009e-08
ENSMUSG00000064294	Aox3	protein_coding	5.6538	7.1464	7.82486	5.6538	5.7849	5.06048	4.182e-07
ENSMUSG00000042249	Adrbk2	protein_coding	5.83472	7.1464	7.82486	5.83472	5.59224	4.86491	1.14508e-06
ENSMUSG00000029661	Col1a2	protein_coding	4.79442	7.1464	8.41285	4.79442	5.41777	4.69302	2.69206e-06
ENSMUSG00000040653	Ppp1r14c	protein_coding	5.60857	7.1464	7.91532	5.60857	5.15002	4.43935	9.02308e-06
ENSMUSG00000026107	Nabp1	protein_coding	4.88488	7.1464	8.1867	4.88488	4.87296	4.16303	3.14047e-05
ENSMUSG00000019806	Aig1	protein_coding	2.66859	7.1464	7.87009	2.66859	4.18786	3.45273	0.000554939
ENSMUSG00000069117	Gm10260	protein_coding	2.21629	7.1464	7.91532	2.21629	3.71835	2.96193	0.00305722
ENSMUSG00000031722	Hp	protein_coding	1.58306	7.1464	8.00578	1.58306	3.03942	2.25608	0.0240655
ENSMUSG00000060703	Cd302	protein_coding	5.92518	7.10117	7.96055	5.92518	6.25812	5.54228	2.98558e-08
ENSMUSG00000062593	Lilrb4a	protein_coding	5.47288	7.10117	8.14147	5.47288	6.0788	5.36045	8.30156e-08
ENSMUSG00000061100	Retnla	protein_coding	5.47288	7.10117	8.00578	5.47288	5.61356	4.8845	1.0369e-06
ENSMUSG00000079659	Tmem243	protein_coding	3.88981	7.10117	7.91532	3.88981	5.18703	4.47049	7.80412e-06
ENSMUSG00000024059	Clip4	protein_coding	5.69903	7.10117	7.87009	5.69903	5.16815	4.45495	8.39131e-06
ENSMUSG00000037649	H2-DMa	protein_coding	5.6538	7.10117	8.09624	5.6538	4.15566	3.4185	0.000629663
ENSMUSG00000033361	Prrg3	protein_coding	5.83472	7.05594	7.96055	5.83472	6.06382	5.34452	9.06548e-08
ENSMUSG00000001496	Nkx2-1	protein_coding	5.69903	7.05594	7.68917	5.69903	5.98319	5.26472	1.40401e-07
ENSMUSG00000035901	Dennd5a	protein_coding	5.78949	7.05594	7.82486	5.78949	5.51558	4.78888	1.67716e-06
ENSMUSG00000019916	P4ha1	protein_coding	5.2015	7.05594	7.96055	5.2015	4.59631	3.87759	0.000105494
ENSMUSG00000022146	Osmr	protein_coding	4.43258	7.05594	7.96055	4.43258	4.50515	3.7805	0.000156512
ENSMUSG00000034317	Trim59	protein_coding	2.26152	7.05594	7.91532	2.26152	3.95016	3.19834	0.00138222
ENSMUSG00000028214	Gem	protein_coding	4.88488	7.05594	8.05101	4.88488	3.72369	2.96757	0.00300161
ENSMUSG00000030351	Tspan11	protein_coding	5.60857	7.01071	7.7344	5.60857	5.91581	5.19752	2.01961e-07
ENSMUSG00000062778	Chia1	protein_coding	5.56334	7.01071	8.09624	5.56334	5.62207	4.89262	9.95032e-07
ENSMUSG00000039672	Kcne2	protein_coding	5.38242	7.01071	8.14147	5.38242	5.44736	4.72402	2.31223e-06
ENSMUSG00000040564	Apoc1	protein_coding	5.38242	7.01071	7.82486	5.38242	5.41115	4.68614	2.784e-06
ENSMUSG00000053702	Nebl	protein_coding	5.33719	7.01071	7.87009	5.33719	4.50637	3.78148	0.000155898
ENSMUSG00000106375	Gm43361	TEC	5.29196	7.01071	8.32239	5.29196	4.42616	3.69931	0.000216182
ENSMUSG00000046808	Atp10d	polymorphic_pseudogene	3.93504	7.01071	7.87009	3.93504	3.74274	2.9875	0.00281265
ENSMUSG00000028980	H6pd	protein_coding	1.0403	7.01071	7.64394	1.0403	3.01728	2.23262	0.025574
ENSMUSG00000035354	Uvrag	protein_coding	0.768917	7.01071	7.68917	0.768917	2.68378	1.89142	0.058568
ENSMUSG00000048120	Entpd1	protein_coding	5.56334	6.96548	7.68917	5.56334	5.18201	4.46672	7.94273e-06
ENSMUSG00000035385	Ccl2	protein_coding	2.66859	6.96548	8.95562	2.66859	3.54715	2.77855	0.00546021
ENSMUSG00000026004	Kansl1l	protein_coding	1.22122	6.96548	7.82486	1.22122	2.93082	2.1432	0.0320972
ENSMUSG00000022372	Sla	protein_coding	5.0658	6.92025	7.82486	5.0658	5.59767	4.87032	1.11415e-06
ENSMUSG00000015568	Lpl	protein_coding	4.88488	6.92025	7.77963	4.88488	5.52086	4.79342	1.63963e-06
ENSMUSG00000004988	Fxyd4	protein_coding	5.60857	6.92025	7.87009	5.60857	5.35883	4.6399	3.48586e-06
ENSMUSG00000022899	Slc15a2	protein_coding	4.34212	6.92025	7.82486	4.34212	4.46027	3.73232	0.000189727
ENSMUSG00000018339	Gpx3	protein_coding	0.316613	6.92025	7.68917	0.316613	3.5023	2.73047	0.0063245
ENSMUSG00000030309	Caprin2	protein_coding	1.22122	6.92025	7.91532	1.22122	2.99484	2.21071	0.0270561
ENSMUSG00000044349	Snhg11	protein_coding	4.56827	6.92025	7.7344	4.56827	2.95609	2.17028	0.0299854
ENSMUSG00000073409	H2-Q6	protein_coding	1.4926	6.92025	7.7344	1.4926	2.86278	2.07442	0.0380399
ENSMUSG00000020566	Atp6v1c2	protein_coding	5.38242	6.87502	7.96055	5.38242	5.81014	5.08826	3.6137e-07
ENSMUSG00000022098	Bmp1	protein_coding	5.60857	6.87502	7.77963	5.60857	5.26181	4.54423	5.51355e-06
ENSMUSG00000038291	Snx25	protein_coding	4.83965	6.87502	7.64394	4.83965	4.75966	4.04992	5.12362e-05
ENSMUSG00000031304	Il2rg	protein_coding	0.452304	6.87502	7.87009	0.452304	3.80908	3.05377	0.00225987
ENSMUSG00000038375	Trp53inp2	protein_coding	2.0806	6.87502	7.64394	2.0806	3.68603	2.92881	0.00340258
ENSMUSG00000020532	Acaca	protein_coding	1.71876	6.87502	7.68917	1.71876	3.40547	2.63381	0.00844315
ENSMUSG00000060550	H2-Q7	protein_coding	1.89968	6.87502	7.68917	1.89968	3.29209	2.52101	0.0117018
ENSMUSG00000003882	Il7r	protein_coding	5.56334	6.82979	7.82486	5.56334	6.20804	5.49216	3.97058e-08
ENSMUSG00000047867	Gimap6	protein_coding	5.6538	6.82979	8.05101	5.6538	5.85422	5.13563	2.81203e-07
ENSMUSG00000079293	Clec7a	polymorphic_pseudogene	4.70396	6.82979	8.27716	4.70396	5.67292	4.94568	7.58777e-07
ENSMUSG00000005360	Slc1a3	protein_coding	5.42765	6.82979	7.7344	5.42765	5.0185	4.30972	1.63459e-05
ENSMUSG00000023927	Satb1	protein_coding	4.47781	6.82979	8.00578	4.47781	4.4413	3.71403	0.000203982
ENSMUSG00000028525	Pde4b	protein_coding	4.83965	6.82979	7.96055	4.83965	4.26206	3.52753	0.00041946
ENSMUSG00000034723	Tmx4	protein_coding	4.38735	6.82979	7.82486	4.38735	4.24223	3.50612	0.000454697
ENSMUSG00000025151	Maged1	protein_coding	3.39228	6.82979	7.64394	3.39228	3.93597	3.18319	0.00145664
ENSMUSG00000027360	Hdc	protein_coding	3.25659	6.82979	7.7344	3.25659	3.92712	3.17369	0.00150513
ENSMUSG00000037095	Lrg1	protein_coding	2.03537	6.82979	7.64394	2.03537	3.14471	2.36956	0.0178091
ENSMUSG00000060969	Irx1	protein_coding	5.42765	6.78456	7.46302	5.42765	5.49567	4.76838	1.85717e-06
ENSMUSG00000035967	Ddx26b	protein_coding	4.93011	6.78456	7.59871	4.93011	4.9125	4.20265	2.63813e-05
ENSMUSG00000048186	Bend7	protein_coding	4.88488	6.78456	7.82486	4.88488	4.02436	3.27926	0.0010408
ENSMUSG00000021922	Itih4	protein_coding	1.76399	6.78456	8.00578	1.76399	3.17631	2.40113	0.0163443
ENSMUSG00000028957	Per3	protein_coding	0.723686	6.78456	7.64394	0.723686	2.72752	1.93372	0.0531471
ENSMUSG00000089672	Lilr4b	protein_coding	5.33719	6.73933	8.09624	5.33719	5.74738	5.02209	5.11111e-07
ENSMUSG00000024727	Trpm6	protein_coding	5.15627	6.73933	7.59871	5.15627	5.31491	4.59873	4.25067e-06
ENSMUSG00000027340	Slc23a2	protein_coding	5.02057	6.73933	7.55348	5.02057	4.92712	4.21645	2.48182e-05
ENSMUSG00000023460	Rab12	protein_coding	4.74919	6.73933	7.50825	4.74919	4.38945	3.66005	0.000252166
ENSMUSG00000105933	Gm43260	sense_intronic	4.29689	6.73933	7.7344	4.29689	4.22056	3.48582	0.000490633
ENSMUSG00000002985	Apoe	protein_coding	2.62336	6.73933	7.77963	2.62336	3.94465	3.19287	0.00140865
ENSMUSG00000020034	Tcp11l2	protein_coding	1.80922	6.73933	7.55348	1.80922	3.49316	2.72088	0.00651089
ENSMUSG00000036585	Fgf1	protein_coding	2.89475	6.73933	7.55348	2.89475	3.40632	2.6342	0.00843351
ENSMUSG00000040652	Oaz2	protein_coding	2.0806	6.73933	7.55348	2.0806	3.19443	2.41941	0.0155457
ENSMUSG00000039585	Myo9a	protein_coding	0.723686	6.73933	7.46302	0.723686	2.70532	1.91178	0.0559047
ENSMUSG00000022181	C6	protein_coding	4.93011	6.6941	7.50825	4.93011	5.44002	4.71634	2.40124e-06
ENSMUSG00000052727	Map1b	protein_coding	4.83965	6.6941	7.82486	4.83965	5.36771	4.64638	3.37807e-06
ENSMUSG00000038521	C1s1	protein_coding	3.1209	6.6941	7.50825	3.1209	5.11707	4.4055	1.05542e-05
ENSMUSG00000029563	Foxp2	protein_coding	4.93011	6.6941	7.55348	4.93011	4.85085	4.14096	3.45862e-05
ENSMUSG00000048960	Prex2	protein_coding	5.15627	6.6941	7.46302	5.15627	4.48381	3.75816	0.000171165
ENSMUSG00000059970	Hspa2	protein_coding	1.99014	6.6941	7.91532	1.99014	3.86761	3.11259	0.00185451
ENSMUSG00000063663	Brwd3	protein_coding	2.03537	6.6941	7.64394	2.03537	3.38567	2.61414	0.00894511
ENSMUSG00000004085	Zak	protein_coding	1.40214	6.6941	7.55348	1.40214	3.27683	2.50477	0.0122531
ENSMUSG00000037712	Fermt2	protein_coding	5.24673	6.64887	7.46302	5.24673	5.56806	4.8412	1.29055e-06
ENSMUSG00000047963	Stbd1	protein_coding	4.93011	6.64887	7.59871	4.93011	4.8126	4.10308	4.07695e-05
ENSMUSG00000029475	Kdm2b	protein_coding	4.65873	6.64887	7.68917	4.65873	4.37255	3.64317	0.000269303
ENSMUSG00000062609	Kcnj15	protein_coding	4.25166	6.64887	7.46302	4.25166	3.78712	3.03209	0.00242866
ENSMUSG00000017007	Rbpjl	protein_coding	3.5732	6.64887	7.41779	3.5732	3.69032	2.93369	0.00334959
ENSMUSG00000041695	Kcnj2	protein_coding	2.5329	6.64887	7.55348	2.5329	3.17946	2.40425	0.0162057
ENSMUSG00000004056	Akt2	protein_coding	0.723686	6.64887	7.46302	0.723686	2.66866	1.87642	0.0605972
ENSMUSG00000060459	Kng2	protein_coding	4.74919	6.60364	7.46302	4.74919	5.56119	4.83414	1.33723e-06
ENSMUSG00000054263	Lifr	protein_coding	4.97534	6.60364	7.46302	4.97534	4.96539	4.25436	2.09647e-05
ENSMUSG00000027070	Lrp2	protein_coding	4.65873	6.60364	7.37256	4.65873	4.7141	4.0041	6.22539e-05
ENSMUSG00000042042	Csgalnact2	protein_coding	4.79442	6.60364	7.59871	4.79442	4.34632	3.61482	0.00030056
ENSMUSG00000053641	Dennd4a	protein_coding	3.30182	6.60364	7.77963	3.30182	3.77629	3.02174	0.00251329
ENSMUSG00000000600	Krit1	protein_coding	1.44737	6.60364	7.55348	1.44737	3.31375	2.54171	0.0110312
ENSMUSG00000042508	Dmtf1	protein_coding	1.53783	6.60364	7.59871	1.53783	3.15885	2.38327	0.0171597
ENSMUSG00000046185	Zfp84	protein_coding	2.03537	6.60364	7.41779	2.03537	2.91205	2.12483	0.0336008
ENSMUSG00000027962	Vcam1	protein_coding	-0.361843	6.60364	7.41779	0	1.7427	0.974825	0.329647
ENSMUSG00000033420	Antxr1	protein_coding	4.56827	6.55841	7.37256	4.56827	5.32575	4.60774	4.0706e-06
ENSMUSG00000053475	Tnfaip6	protein_coding	2.66859	6.55841	7.7344	2.66859	5.09904	4.38872	1.1402e-05
ENSMUSG00000068220	Lgals1	protein_coding	5.02057	6.55841	7.50825	5.02057	4.75839	4.04892	5.14553e-05
ENSMUSG00000022799	Arhgap31	protein_coding	3.52797	6.55841	7.32732	3.52797	4.13617	3.39949	0.000675117
ENSMUSG00000071637	Cebpd	protein_coding	3.75412	6.55841	7.41779	3.75412	4.08852	3.35008	0.000807869
ENSMUSG00000025492	Ifitm3	protein_coding	4.65873	6.55841	7.59871	4.65873	4.03571	3.29207	0.000994542
ENSMUSG00000066407	Gm10263	protein_coding	1.80922	6.55841	7.28209	1.80922	3.4532	2.68279	0.00730112
ENSMUSG00000008206	Cers4	protein_coding	3.39228	6.55841	7.41779	3.39228	3.44816	2.67777	0.00741144
ENSMUSG00000022893	Adamts1	protein_coding	1.22122	6.55841	7.46302	1.22122	2.93643	2.14925	0.0316144
ENSMUSG00000022940	Pigp	protein_coding	1.35691	6.55841	7.50825	1.35691	2.81904	2.02963	0.0423944
ENSMUSG00000025986	Slc39a10	protein_coding	1.0403	6.55841	7.50825	1.0403	2.77592	1.98307	0.04736
ENSMUSG00000039607	Rbms3	protein_coding	0.768917	6.55841	7.32732	0.768917	2.54916	1.75195	0.0797824
ENSMUSG00000047648	Fbxo30	protein_coding	0.587995	6.55841	7.41779	0.587995	2.36898	1.56652	0.117227
ENSMUSG00000032679	Cd59a	protein_coding	4.93011	6.51318	7.41779	4.93011	5.91876	5.19998	1.99306e-07
ENSMUSG00000031239	Itm2a	protein_coding	5.02057	6.51318	7.59871	5.02057	5.22035	4.5041	6.66548e-06
ENSMUSG00000019917	2018-09-10	protein_coding	3.88981	6.51318	7.37256	3.88981	4.63501	3.91859	8.90676e-05
ENSMUSG00000032553	Srprb	protein_coding	3.34705	6.51318	7.55348	3.34705	3.82743	3.0719	0.00212702
ENSMUSG00000066357	Wdr6	protein_coding	1.94491	6.51318	7.46302	1.94491	2.89347	2.10664	0.0351486
ENSMUSG00000022555	Dgat1	protein_coding	1.99014	6.51318	7.46302	1.99014	2.87626	2.08842	0.0367595
ENSMUSG00000024083	Pja2	protein_coding	0.859378	6.51318	7.37256	0.859378	2.6844	1.89169	0.0585323
ENSMUSG00000041777	Cir1	protein_coding	0.361843	6.51318	7.23686	0.361843	2.19107	1.39403	0.163308
ENSMUSG00000032060	Cryab	protein_coding	4.97534	6.46795	7.37256	4.97534	5.60963	4.88082	1.05646e-06
ENSMUSG00000009628	Tex15	protein_coding	4.97534	6.46795	7.55348	4.97534	5.60552	4.87693	1.07751e-06
ENSMUSG00000030785	Cox6a2	protein_coding	4.70396	6.46795	7.46302	4.70396	5.40172	4.67815	2.89481e-06
ENSMUSG00000031647	Mfap3l	protein_coding	4.47781	6.46795	7.37256	4.47781	5.27388	4.55618	5.2092e-06
ENSMUSG00000026358	Rgs1	protein_coding	3.48274	6.46795	8.45809	3.48274	4.32813	3.59825	0.000320361
ENSMUSG00000035805	Mlc1	protein_coding	4.47781	6.46795	7.28209	4.47781	4.31333	3.5827	0.000340057
ENSMUSG00000074364	Ehd2	protein_coding	3.66366	6.46795	7.28209	3.66366	4.19233	3.45642	0.000547406
ENSMUSG00000027805	Pfn2	protein_coding	4.20643	6.46795	7.50825	4.20643	4.08706	3.34875	0.000811776
ENSMUSG00000048376	F2r	protein_coding	4.52304	6.46795	7.37256	4.52304	3.92158	3.16856	0.00153195
ENSMUSG00000069892	9930111J21Rik2	protein_coding	3.30182	6.46795	7.50825	3.30182	3.78694	3.03209	0.00242866
ENSMUSG00000038893	Fam117a	protein_coding	3.39228	6.46795	7.28209	3.39228	3.38127	2.61034	0.00904532
ENSMUSG00000036390	Gadd45a	protein_coding	1.76399	6.46795	7.23686	1.76399	3.14119	2.36688	0.0179385
ENSMUSG00000043542	Zc2hc1a	protein_coding	1.58306	6.46795	7.37256	1.58306	2.95124	2.16523	0.0303702
ENSMUSG00000037868	Egr2	protein_coding	1.44737	6.46795	7.37256	1.44737	2.93363	2.14624	0.031854
ENSMUSG00000103220	Gm37728	TEC	1.99014	6.46795	7.32732	1.99014	2.92154	2.13445	0.0328056
ENSMUSG00000002845	Tmem39a	protein_coding	1.26645	6.46795	7.41779	1.26645	2.90478	2.11741	0.0342249
ENSMUSG00000043421	Hilpda	protein_coding	0.814147	6.46795	7.50825	0.814147	2.55541	1.75894	0.0785873
ENSMUSG00000056973	Ces1d	protein_coding	0.587995	6.46795	7.1464	0.587995	2.51382	1.71949	0.0855248
ENSMUSG00000055435	Maf	protein_coding	-0.0452304	6.46795	7.32732	0	1.88696	1.10845	0.267668
ENSMUSG00000026761	Orc4	protein_coding	-0.452304	6.46795	7.19163	0	1.5911	0.841263	0.400201
ENSMUSG00000033220	Rac2	protein_coding	5.0658	6.42272	7.32732	5.0658	6.04187	5.3254	1.00729e-07
ENSMUSG00000031523	Dlc1	protein_coding	4.93011	6.42272	7.37256	4.93011	5.96065	5.24108	1.59638e-07
ENSMUSG00000062939	Stat4	protein_coding	4.47781	6.42272	7.37256	4.47781	5.71999	4.9943	5.90483e-07
ENSMUSG00000076928	Trac	TR_C_gene	2.75905	6.42272	7.46302	2.75905	5.13384	4.42249	9.75705e-06
ENSMUSG00000027398	Il1b	protein_coding	3.07567	6.42272	7.55348	3.07567	4.76357	4.05341	5.04775e-05
ENSMUSG00000024940	Ltbp3	protein_coding	4.56827	6.42272	7.28209	4.56827	4.64557	3.92998	8.4953e-05
ENSMUSG00000037754	Ppp1r16b	protein_coding	4.83965	6.42272	7.82486	4.83965	4.20925	3.47445	0.000511894
ENSMUSG00000036368	Rmdn2	protein_coding	3.30182	6.42272	7.46302	3.30182	3.74939	2.99423	0.00275139
ENSMUSG00000053646	Plxnb1	protein_coding	2.30675	6.42272	7.37256	2.30675	3.2338	2.46117	0.0138486
ENSMUSG00000040339	Fam102b	protein_coding	1.35691	6.42272	7.50825	1.35691	3.00327	2.21938	0.026461
ENSMUSG00000067158	Col4a4	protein_coding	4.88488	6.37749	7.37256	4.88488	5.91427	5.19665	2.02907e-07
ENSMUSG00000105361	AY036118	lincRNA	5.02057	6.37749	7.37256	5.02057	5.88722	5.17027	2.33761e-07
ENSMUSG00000029675	Eln	protein_coding	4.65873	6.37749	7.28209	4.65873	5.37052	4.6486	3.34203e-06
ENSMUSG00000030352	Tspan9	protein_coding	3.98028	6.37749	7.23686	3.98028	5.32347	4.6066	4.09297e-06
ENSMUSG00000018217	Pmp22	protein_coding	4.74919	6.37749	7.50825	4.74919	5.31596	4.59929	4.23924e-06
ENSMUSG00000022389	Tef	protein_coding	4.74919	6.37749	7.37256	4.74919	5.04803	4.33832	1.43575e-05
ENSMUSG00000034810	Scn7a	protein_coding	4.65873	6.37749	7.41779	4.65873	4.76349	4.05341	5.04775e-05
ENSMUSG00000038679	Trps1	protein_coding	4.56827	6.37749	7.50825	4.56827	4.70726	3.99709	6.41267e-05
ENSMUSG00000038116	Phf20	protein_coding	4.29689	6.37749	7.55348	4.29689	3.79025	3.03404	0.00241302
ENSMUSG00000075590	Nrbp2	protein_coding	2.84952	6.37749	7.41779	2.84952	3.48679	2.71576	0.00661248
ENSMUSG00000038886	Man2a2	protein_coding	3.5732	6.37749	7.19163	3.5732	3.47119	2.69953	0.00694383
ENSMUSG00000058715	Fcer1g	protein_coding	4.02551	6.37749	7.41779	4.02551	3.44294	2.6723	0.00753325
ENSMUSG00000013846	St3gal1	protein_coding	2.35198	6.37749	7.23686	2.35198	3.26631	2.49316	0.0126611
ENSMUSG00000031089	Slc6a14	protein_coding	1.40214	6.37749	7.37256	1.40214	3.00184	2.21789	0.0265621
ENSMUSG00000051615	Rap2a	protein_coding	1.44737	6.37749	7.37256	1.44737	2.80672	2.01644	0.0437537
ENSMUSG00000030340	Scnn1a	protein_coding	1.22122	6.37749	7.01071	1.22122	2.71151	1.91798	0.055113
ENSMUSG00000090213	Tmem189	protein_coding	0.452304	6.37749	7.23686	0.452304	2.29244	1.49093	0.135979
ENSMUSG00000109536	9330162G02Rik	TEC	0.768917	6.37749	7.37256	0.768917	2.29178	1.49053	0.136085
ENSMUSG00000035181	Heatr5a	protein_coding	0.316613	6.37749	7.01071	0.316613	2.22775	1.43092	0.152453
ENSMUSG00000028229	Rmdn1	protein_coding	0.271382	6.37749	7.23686	0.271382	2.13397	1.34101	0.179916
ENSMUSG00000032578	Cish	protein_coding	-0.0452304	6.37749	7.05594	0	1.92665	1.14583	0.251864
ENSMUSG00000032555	Topbp1	protein_coding	-0.949838	6.37749	7.1464	0	1.43346	0.703955	0.481461
ENSMUSG00000021760	Gpx8	protein_coding	5.0658	6.33226	7.37256	5.0658	6.03047	5.3144	1.0701e-07
ENSMUSG00000015340	Cybb	protein_coding	4.74919	6.33226	7.50825	4.74919	5.84363	5.12533	2.97017e-07
ENSMUSG00000001946	Esam	protein_coding	4.38735	6.33226	7.23686	4.38735	5.66676	4.93948	7.83301e-07
ENSMUSG00000051579	Tceal8	protein_coding	2.44244	6.33226	7.23686	2.44244	3.19338	2.41854	0.0155829
ENSMUSG00000024070	Prkd3	protein_coding	1.99014	6.33226	7.28209	1.99014	3.14255	2.36786	0.0178915
ENSMUSG00000030921	Trim30a	protein_coding	2.89475	6.33226	7.32732	2.89475	3.11489	2.3385	0.0193612
ENSMUSG00000047242	Taf9b	protein_coding	0.180922	6.33226	7.1464	0.180922	2.86181	2.07345	0.0381306
ENSMUSG00000029765	Plxna4	protein_coding	1.67352	6.33226	7.10117	1.67352	2.84046	2.05205	0.040165
ENSMUSG00000026313	Hdac4	protein_coding	0.497534	6.33226	6.96548	0.497534	2.46269	1.66376	0.0961606
ENSMUSG00000022359	Wdyhv1	protein_coding	0.587995	6.33226	7.37256	0.587995	2.43972	1.64087	0.100824
ENSMUSG00000024747	Aldh1a7	protein_coding	0.316613	6.33226	7.32732	0.316613	2.23009	1.43274	0.151931
ENSMUSG00000032307	Ube2q2	protein_coding	0.226152	6.33226	7.05594	0.226152	2.14605	1.35255	0.176201
ENSMUSG00000039831	Arhgap29	protein_coding	-0.678456	6.33226	7.01071	0	1.51819	0.777908	0.436623
ENSMUSG00000038546	Ranbp9	protein_coding	-0.768917	6.33226	7.19163	0	1.25207	0.550059	0.582279
ENSMUSG00000079465	Col4a3	protein_coding	5.0658	6.28703	7.32732	5.0658	5.66339	4.93645	7.95573e-07
ENSMUSG00000037736	Limch1	protein_coding	4.79442	6.28703	7.41779	4.79442	5.40361	4.67929	2.87877e-06
ENSMUSG00000028278	Rragd	protein_coding	4.74919	6.28703	7.32732	4.74919	4.95924	4.24896	2.14761e-05
ENSMUSG00000034467	Dynlrb2	protein_coding	4.83965	6.28703	7.41779	4.83965	4.9406	4.22994	2.33752e-05
ENSMUSG00000019852	Arfgef3	protein_coding	4.70396	6.28703	7.37256	4.70396	4.93193	4.22045	2.43814e-05
ENSMUSG00000001506	Col1a1	protein_coding	4.02551	6.28703	7.41779	4.02551	4.55525	3.83281	0.000126686
ENSMUSG00000070436	Serpinh1	protein_coding	4.43258	6.28703	7.19163	4.43258	4.37512	3.64533	0.000267049
ENSMUSG00000031355	Arhgap6	protein_coding	2.5329	6.28703	7.23686	2.5329	4.32793	3.59825	0.000320361
ENSMUSG00000056305	Usp39	protein_coding	3.75412	6.28703	7.1464	3.75412	3.65103	2.88995	0.00385307
ENSMUSG00000028894	Inpp5b	protein_coding	3.03044	6.28703	7.23686	3.03044	3.32844	2.55717	0.0105528
ENSMUSG00000007617	Homer1	protein_coding	1.17599	6.28703	7.1464	1.17599	2.71593	1.92295	0.0544866
ENSMUSG00000030707	Coro1a	protein_coding	0.226152	6.28703	7.28209	0.226152	2.66451	1.87177	0.0612384
ENSMUSG00000047989	Ino80c	protein_coding	0.678456	6.28703	7.32732	0.678456	2.48605	1.68835	0.0913433
ENSMUSG00000061313	Ddhd2	protein_coding	0.135691	6.28703	7.28209	0.135691	2.09819	1.30647	0.191394
ENSMUSG00000035949	Fbxw2	protein_coding	-0.497534	6.28703	6.87502	0	1.59884	0.846701	0.397162
ENSMUSG00000030579	Tyrobp	protein_coding	4.88488	6.2418	7.28209	4.88488	5.9563	5.23707	1.63146e-07
ENSMUSG00000000682	Cd52	protein_coding	4.97534	6.2418	7.50825	4.97534	5.91916	5.19998	1.99306e-07
ENSMUSG00000078607	1810010H24Rik	protein_coding	4.38735	6.2418	7.1464	4.38735	5.57512	4.84849	1.24403e-06
ENSMUSG00000022144	Gdnf	protein_coding	4.1612	6.2418	7.19163	4.1612	5.55446	4.82723	1.38448e-06
ENSMUSG00000030844	Rgs10	protein_coding	4.79442	6.2418	7.28209	4.79442	5.40333	4.67929	2.87877e-06
ENSMUSG00000062785	Kcnc3	protein_coding	3.1209	6.2418	7.01071	3.1209	4.89247	4.18154	2.89536e-05
ENSMUSG00000003134	Tbc1d8	protein_coding	3.93504	6.2418	7.32732	3.93504	3.83163	3.07618	0.0020967
ENSMUSG00000002980	Bcam	protein_coding	3.03044	6.2418	6.96548	3.03044	3.57363	2.80836	0.00497939
ENSMUSG00000016194	Hsd11b1	protein_coding	0.316613	6.2418	7.28209	0.316613	3.43683	2.66607	0.00767441
ENSMUSG00000034159	2310007B03Rik	protein_coding	4.25166	6.2418	7.1464	4.25166	3.4102	2.63769	0.00834736
ENSMUSG00000031889	D230025D16Rik	protein_coding	2.17106	6.2418	7.23686	2.17106	3.33865	2.56893	0.0102012
ENSMUSG00000024613	Tcof1	protein_coding	1.89968	6.2418	7.19163	1.89968	3.20171	2.42611	0.0152618
ENSMUSG00000021125	Arg2	protein_coding	1.76399	6.2418	7.23686	1.76399	3.09678	2.31855	0.0204193
ENSMUSG00000031387	Renbp	protein_coding	1.94491	6.2418	7.19163	1.94491	2.93558	2.14845	0.0316778
ENSMUSG00000039270	Megf9	protein_coding	2.80428	6.2418	7.23686	2.80428	2.91522	2.12804	0.0333334
ENSMUSG00000026727	Rsu1	protein_coding	1.0403	6.2418	7.28209	1.0403	2.72164	1.92796	0.0538605
ENSMUSG00000038094	Atp13a4	protein_coding	0.859378	6.2418	7.19163	0.859378	2.39601	1.59319	0.111117
ENSMUSG00000034189	Hsdl1	protein_coding	-0.316613	6.2418	7.19163	0	1.66477	0.902541	0.36677
ENSMUSG00000025558	Dock9	protein_coding	-0.542765	6.2418	7.05594	0	1.52455	0.78123	0.434668
ENSMUSG00000019777	Hdac2	protein_coding	-4.29689	6.2418	6.87502	0	0.920878	0.309421	0.757001
ENSMUSG00000024143	Rhoq	protein_coding	4.47781	6.19656	7.32732	4.47781	5.17916	4.46464	8.02045e-06
ENSMUSG00000034957	Cebpa	protein_coding	3.39228	6.19656	7.01071	3.39228	4.86684	4.15696	3.22516e-05
ENSMUSG00000048285	Frmd6	protein_coding	3.16613	6.19656	7.10117	3.16613	4.64284	3.92726	8.5918e-05
ENSMUSG00000024935	Slc1a1	protein_coding	2.89475	6.19656	7.01071	2.89475	4.44915	3.72059	0.000198756
ENSMUSG00000030956	Fam53b	protein_coding	3.98028	6.19656	7.05594	3.98028	4.21134	3.4757	0.000509514
ENSMUSG00000045896	Paip2b	protein_coding	4.11597	6.19656	7.28209	4.11597	3.97093	3.22135	0.00127588
ENSMUSG00000022951	Rcan1	protein_coding	2.84952	6.19656	7.10117	2.84952	3.75107	2.99582	0.00273704
ENSMUSG00000106874	Gm20186	lincRNA	3.61843	6.19656	7.10117	3.61843	3.6984	2.94141	0.00326722
ENSMUSG00000022090	Pdlim2	protein_coding	3.75412	6.19656	7.19163	3.75412	3.64663	2.88562	0.00390643
ENSMUSG00000025511	Tspan4	protein_coding	2.75905	6.19656	7.10117	2.75905	3.36045	2.59028	0.00958982
ENSMUSG00000034292	Traf3ip1	protein_coding	2.71382	6.19656	7.19163	2.71382	3.35323	2.58324	0.00978776
ENSMUSG00000026674	Ddr2	protein_coding	2.39721	6.19656	7.1464	2.39721	3.15967	2.38389	0.0171309
ENSMUSG00000073700	Klhl21	protein_coding	3.07567	6.19656	7.23686	3.07567	3.1587	2.38327	0.0171597
ENSMUSG00000024867	Pip5k1b	protein_coding	1.89968	6.19656	7.1464	1.89968	2.87449	2.08643	0.0369397
ENSMUSG00000027639	Samhd1	protein_coding	1.08553	6.19656	7.05594	1.08553	2.65932	1.86682	0.0619262
ENSMUSG00000071708	Sms	protein_coding	0.723686	6.19656	7.1464	0.723686	2.46078	1.66179	0.0965541
ENSMUSG00000034557	Zfyve9	protein_coding	0.452304	6.19656	7.1464	0.452304	2.31984	1.5173	0.129192
ENSMUSG00000027671	Actl6a	protein_coding	0.361843	6.19656	7.01071	0.361843	2.23939	1.44163	0.149406
ENSMUSG00000021779	Thrb	protein_coding	0.226152	6.19656	7.05594	0.226152	2.09315	1.3019	0.192951
ENSMUSG00000001285	Myg1	protein_coding	0.0452304	6.19656	7.37256	0.0452304	2.00468	1.21872	0.22295
ENSMUSG00000009687	Fxyd5	protein_coding	-0.316613	6.19656	7.19163	0	1.77333	1.00564	0.314589
ENSMUSG00000046949	Nqo2	protein_coding	-0.271382	6.19656	7.10117	0	1.75933	0.991705	0.321341
ENSMUSG00000056144	Trim34a	protein_coding	-2.39721	6.19656	7.28209	0	1.45979	0.727098	0.467166
ENSMUSG00000032531	Amotl2	protein_coding	-0.814147	6.19656	6.96548	0	1.33282	0.615723	0.538077
ENSMUSG00000027611	Procr	protein_coding	4.83965	6.15133	7.23686	4.83965	5.90873	5.19126	2.08874e-07
ENSMUSG00000047844	Bex4	protein_coding	4.56827	6.15133	7.23686	4.56827	5.75125	5.02566	5.01695e-07
ENSMUSG00000075284	Wipf1	protein_coding	4.34212	6.15133	7.10117	4.34212	5.67299	4.94568	7.58777e-07
ENSMUSG00000038587	Akap12	protein_coding	4.65873	6.15133	7.23686	4.65873	5.62911	4.89904	9.63075e-07
ENSMUSG00000031133	Arhgef6	protein_coding	4.74919	6.15133	7.23686	4.74919	5.5176	4.79044	1.66414e-06
ENSMUSG00000030256	Bhlhe41	protein_coding	4.02551	6.15133	7.1464	4.02551	3.84098	3.08501	0.00203544
ENSMUSG00000099974	Bcl2a1d	protein_coding	3.84458	6.15133	7.32732	3.84458	3.66698	2.90661	0.00365364
ENSMUSG00000028677	Rnf220	protein_coding	3.34705	6.15133	6.92025	3.34705	3.63737	2.87606	0.00402673
ENSMUSG00000020717	Pecam1	protein_coding	1.58306	6.15133	7.01071	1.58306	3.55229	2.78383	0.00537217
ENSMUSG00000036432	Siah2	protein_coding	3.07567	6.15133	7.10117	3.07567	3.40899	2.63652	0.00837621
ENSMUSG00000056260	Lrif1	protein_coding	1.67352	6.15133	7.05594	1.67352	3.16113	2.38512	0.0170736
ENSMUSG00000020305	Asb3	protein_coding	2.21629	6.15133	7.28209	2.21629	3.12058	2.3448	0.0190372
ENSMUSG00000001036	Epn2	protein_coding	1.35691	6.15133	7.05594	1.35691	2.99048	2.2072	0.0273004
ENSMUSG00000079057	Cyp4v3	protein_coding	2.0806	6.15133	7.28209	2.0806	2.95638	2.17028	0.0299854
ENSMUSG00000078566	Bnip3	protein_coding	1.40214	6.15133	7.37256	1.40214	2.86077	2.07268	0.038202
ENSMUSG00000098188	Sowahc	protein_coding	1.17599	6.15133	7.05594	1.17599	2.63914	1.84585	0.0649138
ENSMUSG00000023307	2018-03-05	protein_coding	0.678456	6.15133	7.19163	0.678456	2.55177	1.75515	0.0792344
ENSMUSG00000096736	Gm17535	protein_coding	0.452304	6.15133	7.05594	0.452304	2.30759	1.5064	0.131966
ENSMUSG00000056383	AI987944	protein_coding	-0.361843	6.15133	6.96548	0	1.85992	1.08304	0.278792
ENSMUSG00000031342	Gpm6b	protein_coding	-0.271382	6.15133	6.96548	0	1.82672	1.05271	0.292476
ENSMUSG00000044934	Zfp367	protein_coding	-0.361843	6.15133	7.19163	0	1.66631	0.904346	0.365812
ENSMUSG00000049744	Arhgap15	protein_coding	1.89968	6.1061	6.92025	1.89968	4.53292	3.80941	0.000139299
ENSMUSG00000022837	Iqcb1	protein_coding	4.02551	6.1061	7.1464	4.02551	4.22474	3.48871	0.000485356
ENSMUSG00000002504	Slc9a3r2	protein_coding	2.75905	6.1061	7.19163	2.75905	4.17705	3.44233	0.000576724
ENSMUSG00000027339	Rassf2	protein_coding	3.84458	6.1061	7.05594	3.84458	4.13268	3.39638	0.000682843
ENSMUSG00000060962	Dmkn	protein_coding	4.47781	6.1061	7.1464	4.47781	4.06642	3.32684	0.000878369
ENSMUSG00000001911	Nfix	protein_coding	3.16613	6.1061	7.01071	3.16613	3.85037	3.09516	0.00196707
ENSMUSG00000078134	Gm12355	protein_coding	3.88981	6.1061	6.92025	3.88981	3.46225	2.69015	0.00714203
ENSMUSG00000105434	Gm43359	TEC	1.80922	6.1061	7.05594	1.80922	2.92575	2.13842	0.0324827
ENSMUSG00000040940	Arhgef1	protein_coding	1.31168	6.1061	6.82979	1.31168	2.75265	1.95924	0.0500842
ENSMUSG00000027439	Gzf1	protein_coding	0.859378	6.1061	7.19163	0.859378	2.72967	1.93626	0.0528355
ENSMUSG00000056515	Rab31	protein_coding	1.0403	6.1061	7.10117	1.0403	2.61145	1.81654	0.0692874
ENSMUSG00000015243	Abca1	protein_coding	1.22122	6.1061	7.10117	1.22122	2.53643	1.73999	0.0818605
ENSMUSG00000027341	Tmem230	protein_coding	1.22122	6.1061	6.96548	1.22122	2.52622	1.73085	0.0834791
ENSMUSG00000048332	Lhfp	protein_coding	0.814147	6.1061	7.10117	0.814147	2.48727	1.68972	0.0910811
ENSMUSG00000021712	Trim23	protein_coding	-0.723686	6.1061	6.96548	0	1.78061	1.01223	0.31143
ENSMUSG00000009555	Cdk9	protein_coding	-0.633226	6.1061	6.96548	0	1.52979	0.784326	0.432849
ENSMUSG00000049232	Tigd2	protein_coding	-2.75905	6.1061	6.82979	0	1.39772	0.672327	0.501375
ENSMUSG00000032846	Zswim6	protein_coding	-0.859378	6.1061	6.96548	0	1.32086	0.60716	0.543745
ENSMUSG00000021789	Sftpa1	protein_coding	5.11104	6.06087	11.8504	5.11104	7.16081	6.40843	1.47028e-10
ENSMUSG00000036905	C1qb	protein_coding	1.85445	6.06087	7.1464	1.85445	4.81377	4.10394	4.06165e-05
ENSMUSG00000037548	H2-DMb2	protein_coding	3.84458	6.06087	7.05594	3.84458	4.11316	3.37591	0.000735719
ENSMUSG00000043164	Tmem212	protein_coding	3.25659	6.06087	7.1464	3.25659	3.45927	2.68748	0.00719932
ENSMUSG00000026571	Dcaf6	protein_coding	2.03537	6.06087	7.05594	2.03537	3.35831	2.58827	0.00964605
ENSMUSG00000057440	Mpp7	protein_coding	2.21629	6.06087	6.87502	2.21629	3.34506	2.57499	0.0100242
ENSMUSG00000030220	Arhgdib	protein_coding	4.02551	6.06087	7.1464	4.02551	3.33578	2.56568	0.0102975
ENSMUSG00000091017	Fam71a	protein_coding	2.57813	6.06087	6.96548	2.57813	3.27147	2.49836	0.0124768
ENSMUSG00000039801	2410089E03Rik	protein_coding	2.57813	6.06087	7.19163	2.57813	3.13686	2.36237	0.0181586
ENSMUSG00000045435	Tmem60	protein_coding	1.94491	6.06087	7.23686	1.94491	3.04118	2.25803	0.0239439
ENSMUSG00000072235	Tuba1a	protein_coding	0.995069	6.06087	7.19163	0.995069	2.86589	2.07759	0.0377475
ENSMUSG00000074259	Gramd2	protein_coding	1.76399	6.06087	7.23686	1.76399	2.83735	2.04966	0.0403972
ENSMUSG00000092329	Gm20388	protein_coding	1.08553	6.06087	6.96548	1.08553	2.60139	1.80537	0.0710171
ENSMUSG00000004043	Stat5a	protein_coding	0.814147	6.06087	7.1464	0.814147	2.51065	1.71604	0.0861545
ENSMUSG00000022263	Trio	protein_coding	0.859378	6.06087	6.92025	0.859378	2.44186	1.64243	0.1005
ENSMUSG00000005413	Hmox1	protein_coding	0.452304	6.06087	6.96548	0.452304	2.3892	1.58577	0.112791
ENSMUSG00000026484	Rnf2	protein_coding	0.135691	6.06087	6.96548	0.135691	2.08936	1.29799	0.19429
ENSMUSG00000028713	Cyp4b1	protein_coding	-0.407074	6.06087	6.96548	0	1.61547	0.859542	0.390042
ENSMUSG00000024422	Dhx16	protein_coding	-1.0403	6.06087	6.87502	0	1.4446	0.715248	0.474456
ENSMUSG00000020397	Med7	protein_coding	-1.31168	6.06087	6.87502	0	1.19906	0.510423	0.609755
ENSMUSG00000075254	Heg1	protein_coding	4.29689	6.01564	6.96548	4.29689	5.20846	4.49168	7.06647e-06
ENSMUSG00000040170	Fmo2	protein_coding	4.25166	6.01564	6.92025	4.25166	5.18992	4.47282	7.71963e-06
ENSMUSG00000005124	Wisp1	protein_coding	2.75905	6.01564	6.96548	2.75905	5.08302	4.37254	1.22812e-05
ENSMUSG00000027204	Fbn1	protein_coding	3.5732	6.01564	7.19163	3.5732	4.89556	4.18461	2.8566e-05
ENSMUSG00000038855	Itpkb	protein_coding	3.39228	6.01564	6.96548	3.39228	4.57935	3.85962	0.000113564
ENSMUSG00000024238	Zeb1	protein_coding	4.11597	6.01564	7.10117	4.11597	4.43266	3.70554	0.000210943
ENSMUSG00000026705	Klhl20	protein_coding	3.43751	6.01564	7.10117	3.43751	3.90961	3.15798	0.00158868
ENSMUSG00000028793	Rnf19b	protein_coding	2.89475	6.01564	7.01071	2.89475	3.54584	2.77763	0.00547575
ENSMUSG00000050619	Zscan29	protein_coding	3.1209	6.01564	6.92025	3.1209	3.28848	2.51745	0.0118208
ENSMUSG00000020593	Lpin1	protein_coding	3.30182	6.01564	7.01071	3.30182	3.2531	2.48007	0.0131358
ENSMUSG00000057751	Megf6	protein_coding	2.35198	6.01564	6.87502	2.35198	3.20239	2.42644	0.0152478
ENSMUSG00000066233	Tmem42	protein_coding	1.99014	6.01564	6.96548	1.99014	3.07252	2.29181	0.0219169
ENSMUSG00000109739	RP24-116C19.5	protein_coding	0.904608	6.01564	6.92025	0.904608	3.01001	2.22627	0.0259964
ENSMUSG00000048163	Selplg	protein_coding	0.497534	6.01564	6.87502	0.497534	2.89247	2.10576	0.0352251
ENSMUSG00000047539	Fbxo28	protein_coding	1.26645	6.01564	7.10117	1.26645	2.79361	2.00247	0.0452337
ENSMUSG00000024667	Tmem216	protein_coding	1.44737	6.01564	7.28209	1.44737	2.61536	1.82011	0.0687423
ENSMUSG00000083240	Gm13453	processed_pseudogene	1.13076	6.01564	6.78456	1.13076	2.59059	1.79586	0.0725175
ENSMUSG00000035183	Slc24a5	protein_coding	0.949838	6.01564	6.87502	0.949838	2.53424	1.73792	0.0822256
ENSMUSG00000025555	Farp1	protein_coding	0.316613	6.01564	7.01071	0.316613	2.15892	1.36303	0.172873
ENSMUSG00000040268	Plekha1	protein_coding	0.180922	6.01564	7.10117	0.180922	2.09442	1.3032	0.192508
ENSMUSG00000026384	Ptpn4	protein_coding	-0.0904608	6.01564	7.01071	0	1.89852	1.11733	0.263853
ENSMUSG00000025579	Gaa	protein_coding	-0.135691	6.01564	6.87502	0	1.8717	1.09352	0.274165
ENSMUSG00000003068	Stk11	protein_coding	-0.226152	6.01564	7.01071	0	1.80646	1.03556	0.300406
ENSMUSG00000054321	Taf4b	protein_coding	-0.271382	6.01564	6.96548	0	1.77656	1.00869	0.313123
ENSMUSG00000026158	Ogfrl1	protein_coding	-0.316613	6.01564	7.01071	0	1.7614	0.994031	0.320208
ENSMUSG00000036676	Tmtc3	protein_coding	-1.08553	6.01564	6.92025	0	1.52484	0.781301	0.434625
ENSMUSG00000032740	Ccdc88a	protein_coding	3.88981	5.97041	7.1464	3.88981	5.43756	4.71423	2.42627e-06
ENSMUSG00000040950	Mgl2	protein_coding	3.61843	5.97041	6.96548	3.61843	5.35052	4.63276	3.60818e-06
ENSMUSG00000021298	Gpr132	protein_coding	3.43751	5.97041	7.01071	3.43751	5.23962	4.52252	6.11088e-06
ENSMUSG00000022876	Samsn1	protein_coding	3.21136	5.97041	6.92025	3.21136	5.22951	4.51339	6.38011e-06
ENSMUSG00000071226	Cecr2	protein_coding	4.1612	5.97041	7.05594	4.1612	5.15402	4.44221	8.90404e-06
ENSMUSG00000030214	Plbd1	protein_coding	4.1612	5.97041	7.1464	4.1612	5.07349	4.36433	1.27514e-05
ENSMUSG00000027778	Ift80	protein_coding	4.1612	5.97041	7.01071	4.1612	4.4025	3.67454	0.000238276
ENSMUSG00000026872	Zeb2	protein_coding	4.11597	5.97041	7.01071	4.11597	4.19196	3.45642	0.000547406
ENSMUSG00000102037	Bcl2a1a	protein_coding	3.43751	5.97041	7.50825	3.43751	4.01642	3.27092	0.00107199
ENSMUSG00000035877	Zhx3	protein_coding	2.5329	5.97041	6.92025	2.5329	3.20626	2.4309	0.0150615
ENSMUSG00000016995	Matn4	protein_coding	3.48274	5.97041	7.01071	3.48274	3.19625	2.42047	0.0155006
ENSMUSG00000014444	Piezo1	protein_coding	2.62336	5.97041	6.92025	2.62336	3.17586	2.40095	0.0163528
ENSMUSG00000047945	Marcksl1	protein_coding	2.5329	5.97041	7.19163	2.5329	3.11806	2.3422	0.0191703
ENSMUSG00000022240	Ctnnd2	protein_coding	3.43751	5.97041	7.10117	3.43751	3.10452	2.32716	0.0199569
ENSMUSG00000020189	Osbpl8	protein_coding	2.44244	5.97041	7.10117	2.44244	3.0451	2.26213	0.0236896
ENSMUSG00000039697	Ncoa7	protein_coding	1.85445	5.97041	6.96548	1.85445	3.02602	2.24093	0.0250303
ENSMUSG00000071266	Zfp946	protein_coding	0.271382	5.97041	6.92025	0.271382	2.16813	1.37147	0.170228
ENSMUSG00000021094	Dhrs7	protein_coding	0.0904608	5.97041	7.01071	0.0904608	2.04429	1.25435	0.209714
ENSMUSG00000000811	Txnrd3	protein_coding	0.0452304	5.97041	7.01071	0.0452304	2.00173	1.21618	0.223916
ENSMUSG00000102594	Gm38381	TEC	-0.452304	5.97041	6.87502	0	1.62473	0.868	0.385394
ENSMUSG00000030965	Fam175b	protein_coding	-0.587995	5.97041	6.78456	0	1.47498	0.740819	0.458803
ENSMUSG00000038671	Arfrp1	protein_coding	-1.89968	5.97041	6.6941	0	1.30466	0.592033	0.553828
ENSMUSG00000037669	Ldah	protein_coding	-3.39228	5.97041	6.64887	0	1.10491	0.436264	0.662645
ENSMUSG00000043953	Ccrl2	protein_coding	4.43258	5.92518	7.01071	4.43258	5.6899	4.96175	6.98626e-07
ENSMUSG00000039497	Dse	protein_coding	3.66366	5.92518	6.92025	3.66366	5.37109	4.6486	3.34203e-06
ENSMUSG00000025648	Pfkfb4	protein_coding	3.61843	5.92518	6.96548	3.61843	5.32559	4.60774	4.0706e-06
ENSMUSG00000066643	Wdr35	protein_coding	3.34705	5.92518	6.96548	3.34705	5.27821	4.56051	5.10297e-06
ENSMUSG00000002059	Rab34	protein_coding	4.07074	5.92518	6.92025	4.07074	4.87797	4.16783	3.07519e-05
ENSMUSG00000024253	Dync2li1	protein_coding	2.35198	5.92518	6.82979	2.35198	4.85832	4.14811	3.35233e-05
ENSMUSG00000001270	Ckb	protein_coding	4.29689	5.92518	6.96548	4.29689	4.82402	4.11435	3.88269e-05
ENSMUSG00000024232	Bambi	protein_coding	2.57813	5.92518	7.05594	2.57813	4.79543	4.08416	4.42365e-05
ENSMUSG00000032702	Kank1	protein_coding	3.39228	5.92518	6.87502	3.39228	4.74188	4.03259	5.51646e-05
ENSMUSG00000014846	Tppp3	protein_coding	4.02551	5.92518	7.19163	4.02551	3.91144	3.15981	0.00157871
ENSMUSG00000022639	Dubr	lincRNA	3.16613	5.92518	6.92025	3.16613	3.86548	3.11041	0.0018683
ENSMUSG00000046351	Zfp322a	protein_coding	1.80922	5.92518	7.05594	1.80922	3.28315	2.51173	0.012014
ENSMUSG00000087530	Gm15533	antisense	3.30182	5.92518	6.87502	3.30182	3.26464	2.49139	0.0127244
ENSMUSG00000005533	Igf1r	protein_coding	1.67352	5.92518	6.96548	1.67352	2.75102	1.95809	0.050219
ENSMUSG00000026360	Rgs2	protein_coding	1.40214	5.92518	6.96548	1.40214	2.73606	1.9427	0.0520528
ENSMUSG00000097263	Gm26804	lincRNA	0.995069	5.92518	6.87502	0.995069	2.72285	1.92907	0.0537226
ENSMUSG00000048787	Dcun1d3	protein_coding	1.4926	5.92518	6.96548	1.4926	2.71093	1.91777	0.05514
ENSMUSG00000029670	Ing3	protein_coding	1.0403	5.92518	6.96548	1.0403	2.49207	1.69484	0.0901049
ENSMUSG00000047854	Stx19	protein_coding	0.723686	5.92518	6.92025	0.723686	2.38819	1.58465	0.113045
ENSMUSG00000024878	Cbwd1	protein_coding	0.723686	5.92518	6.78456	0.723686	2.31721	1.51462	0.12987
ENSMUSG00000056919	Cep162	protein_coding	0.0452304	5.92518	6.82979	0.0452304	2.00301	1.21729	0.223495
ENSMUSG00000015357	Clpx	protein_coding	-0.271382	5.92518	7.01071	0	1.82419	1.05038	0.293543
ENSMUSG00000010911	Apip	protein_coding	-0.316613	5.92518	6.87502	0	1.77707	1.00908	0.312939
ENSMUSG00000019139	Isyna1	protein_coding	-0.587995	5.92518	7.05594	0	1.62649	0.86944	0.384606
ENSMUSG00000032320	Rcn2	protein_coding	-0.768917	5.92518	6.78456	0	1.27143	0.565851	0.571495
ENSMUSG00000021879	Dnah12	protein_coding	3.61843	5.87995	6.82979	3.61843	5.29112	4.5734	4.79867e-06
ENSMUSG00000033278	Ptprm	protein_coding	4.11597	5.87995	6.96548	4.11597	5.08431	4.37345	1.22296e-05
ENSMUSG00000028995	Fam126a	protein_coding	4.02551	5.87995	6.82979	4.02551	4.84813	4.1383	3.49882e-05
ENSMUSG00000093467	Gm20659	antisense	4.02551	5.87995	6.78456	4.02551	4.76733	4.0566	4.97921e-05
ENSMUSG00000038280	Ostm1	protein_coding	3.93504	5.87995	6.87502	3.93504	4.33719	3.60662	0.000310213
ENSMUSG00000026347	Tmem163	protein_coding	0.995069	5.87995	6.73933	0.995069	4.11201	3.37494	0.000738315
ENSMUSG00000004798	Ulk2	protein_coding	2.75905	5.87995	6.82979	2.75905	3.186	2.41095	0.0159108
ENSMUSG00000034135	Sik3	protein_coding	2.17106	5.87995	6.87502	2.17106	3.13248	2.35743	0.0184017
ENSMUSG00000024037	Wdr4	protein_coding	2.03537	5.87995	6.78456	2.03537	2.8423	2.05359	0.0400151
ENSMUSG00000040181	Fmo1	protein_coding	0.180922	5.87995	6.73933	0.180922	2.6009	1.80498	0.0710771
ENSMUSG00000024410	3110002H16Rik	protein_coding	0.587995	5.87995	6.6941	0.587995	2.27793	1.47631	0.139861
ENSMUSG00000071660	Ttc9c	protein_coding	0.542765	5.87995	6.78456	0.542765	2.19393	1.39654	0.162552
ENSMUSG00000074918	Inafm2	antisense	0.180922	5.87995	6.87502	0.180922	2.07982	1.28845	0.197591
ENSMUSG00000109005	Gm45221	TEC	0.0904608	5.87995	6.73933	0.0904608	2.0146	1.22877	0.219159
ENSMUSG00000008429	Herpud2	protein_coding	-0.226152	5.87995	6.78456	0	1.86545	1.08876	0.276258
ENSMUSG00000074564	Gm10720	protein_coding	-0.271382	5.87995	6.73933	0	1.78749	1.01992	0.307765
ENSMUSG00000061731	Ext1	protein_coding	-1.71876	5.87995	6.60364	0	0.853392	0.264281	0.791564
ENSMUSG00000016087	Fli1	protein_coding	3.61843	5.83472	6.6941	3.61843	5.00508	4.29745	1.7277e-05
ENSMUSG00000059325	Hopx	protein_coding	3.39228	5.83472	6.87502	3.39228	4.92744	4.21645	2.48182e-05
ENSMUSG00000059482	2610301B20Rik	protein_coding	2.44244	5.83472	6.60364	2.44244	4.91299	4.2027	2.6375e-05
ENSMUSG00000024653	Scgb1a1	protein_coding	3.48274	5.83472	6.73933	3.48274	4.88817	4.1776	2.94605e-05
ENSMUSG00000024168	Tmem204	protein_coding	2.03537	5.83472	6.6941	2.03537	4.68427	3.97269	7.10642e-05
ENSMUSG00000011148	Adssl1	protein_coding	4.02551	5.83472	6.78456	4.02551	4.37258	3.64317	0.000269303
ENSMUSG00000048307	Ankrd46	protein_coding	3.34705	5.83472	6.87502	3.34705	3.69241	2.93518	0.00333359
ENSMUSG00000027602	Map1lc3a	protein_coding	2.44244	5.83472	6.78456	2.44244	3.49257	2.72084	0.00651167
ENSMUSG00000034663	Bmp2k	protein_coding	2.0806	5.83472	7.05594	2.0806	3.40565	2.63381	0.00844315
ENSMUSG00000059824	Dbp	protein_coding	2.44244	5.83472	6.82979	2.44244	3.31571	2.5432	0.0109844
ENSMUSG00000050989	Sepn1	protein_coding	2.98521	5.83472	6.78456	2.98521	3.16127	2.38512	0.0170736
ENSMUSG00000032020	Ubash3b	protein_coding	2.03537	5.83472	6.96548	2.03537	2.92297	2.13571	0.0327027
ENSMUSG00000075528	Aarsd1	protein_coding	1.53783	5.83472	6.73933	1.53783	2.81869	2.02946	0.0424112
ENSMUSG00000020935	Dcakd	protein_coding	1.94491	5.83472	6.87502	1.94491	2.8031	2.0123	0.0441883
ENSMUSG00000023030	Slc11a2	protein_coding	1.31168	5.83472	6.78456	1.31168	2.64448	1.85132	0.0641241
ENSMUSG00000022106	Rcbtb2	protein_coding	0.904608	5.83472	6.96548	0.904608	2.44704	1.64866	0.0992178
ENSMUSG00000020272	Stk10	protein_coding	0.949838	5.83472	6.78456	0.949838	2.39353	1.59086	0.111642
ENSMUSG00000021033	Gstz1	protein_coding	0.497534	5.83472	6.73933	0.497534	2.38099	1.57774	0.114626
ENSMUSG00000069565	Dazap1	protein_coding	0.814147	5.83472	6.78456	0.814147	2.31172	1.50978	0.1311
ENSMUSG00000028289	Epha7	protein_coding	0.361843	5.83472	6.82979	0.361843	2.18478	1.38775	0.165212
ENSMUSG00000035929	H2-Q4	protein_coding	0.407074	5.83472	6.73933	0.407074	2.18264	1.38552	0.165892
ENSMUSG00000028706	Nsun4	protein_coding	0.0452304	5.83472	6.73933	0.0452304	2.0041	1.21836	0.223086
ENSMUSG00000046139	Patl1	protein_coding	-0.271382	5.83472	6.82979	0	1.82145	1.04801	0.294636
ENSMUSG00000041012	Cmtm8	protein_coding	-0.814147	5.83472	6.55841	0	1.54964	0.80237	0.422339
ENSMUSG00000001521	Tulp3	protein_coding	-4.20643	5.83472	6.46795	0	1.17085	0.488835	0.624958
ENSMUSG00000030243	Recql	protein_coding	-2.93998	5.83472	6.60364	0	1.16951	0.488086	0.625489
ENSMUSG00000029641	Rasl11a	protein_coding	3.5732	5.78949	6.87502	3.5732	5.30473	4.58772	4.48122e-06
ENSMUSG00000041548	Hspb8	protein_coding	3.16613	5.78949	6.73933	3.16613	5.16106	4.44913	8.62178e-06
ENSMUSG00000021069	Pygl	protein_coding	3.30182	5.78949	6.73933	3.30182	5.15255	4.44167	8.92617e-06
ENSMUSG00000028581	Laptm5	protein_coding	4.47781	5.78949	7.05594	4.47781	5.11171	4.40159	1.07461e-05
ENSMUSG00000096956	Snhg18	lincRNA	3.52797	5.78949	6.87502	3.52797	4.94736	4.23618	2.27359e-05
ENSMUSG00000026875	Traf1	protein_coding	3.48274	5.78949	6.78456	3.48274	4.74574	4.03661	5.42301e-05
ENSMUSG00000040520	Manea	protein_coding	2.26152	5.78949	6.6941	2.26152	4.22286	3.4873	0.00048792
ENSMUSG00000053398	Phgdh	protein_coding	0.814147	5.78949	6.78456	0.814147	4.19991	3.4646	0.000531028
ENSMUSG00000019990	Pde7b	protein_coding	1.22122	5.78949	6.78456	1.22122	3.51924	2.74932	0.00597194
ENSMUSG00000059602	Syn3	protein_coding	2.89475	5.78949	6.87502	2.89475	3.29913	2.52822	0.0114641
ENSMUSG00000102856	Gm37084	TEC	3.03044	5.78949	6.82979	3.03044	3.1665	2.39067	0.0168177
ENSMUSG00000032012	Nectin1	protein_coding	1.76399	5.78949	6.6941	1.76399	3.10744	2.32996	0.0198085
ENSMUSG00000042834	Nrep	protein_coding	2.66859	5.78949	6.82979	2.66859	2.98669	2.20351	0.0275586
ENSMUSG00000033904	Ccp110	protein_coding	1.26645	5.78949	6.87502	1.26645	2.84748	2.05832	0.0395596
ENSMUSG00000109498	Gm45222	TEC	1.89968	5.78949	6.78456	1.89968	2.75877	1.96488	0.0494277
ENSMUSG00000034111	Tmed8	protein_coding	1.80922	5.78949	6.82979	1.80922	2.59732	1.80195	0.071554
ENSMUSG00000052331	Ankrd44	protein_coding	0.995069	5.78949	6.87502	0.995069	2.54289	1.74597	0.0808164
ENSMUSG00000062944	9130023H24Rik	protein_coding	1.4926	5.78949	6.73933	1.4926	2.52907	1.73383	0.0829476
ENSMUSG00000031015	Swap70	protein_coding	0.587995	5.78949	6.96548	0.587995	2.34188	1.54007	0.123544
ENSMUSG00000095526	Gm10243	processed_pseudogene	0.135691	5.78949	6.55841	0.135691	2.22735	1.43092	0.152453
ENSMUSG00000081214	Rpl35a-ps2	processed_pseudogene	0.135691	5.78949	6.55841	0.135691	2.22735	1.43092	0.152453
ENSMUSG00000067575	Rpl35a-ps3	processed_pseudogene	0.135691	5.78949	6.55841	0.135691	2.22735	1.43092	0.152453
ENSMUSG00000083424	Rpl35a-ps4	processed_pseudogene	0.135691	5.78949	6.55841	0.135691	2.22735	1.43092	0.152453
ENSMUSG00000094664	Rpl35a-ps6	processed_pseudogene	0.135691	5.78949	6.55841	0.135691	2.22735	1.43092	0.152453
ENSMUSG00000028385	Snx30	protein_coding	0.135691	5.78949	6.64887	0.135691	2.05516	1.26499	0.205876
ENSMUSG00000022125	Cln5	protein_coding	-0.316613	5.78949	6.6941	0	1.8404	1.06487	0.286936
ENSMUSG00000041341	Atg2b	protein_coding	-2.66859	5.78949	6.60364	0	1.60239	0.850201	0.395214
ENSMUSG00000096954	Gdap10	lincRNA	-1.89968	5.78949	6.73933	0	1.08722	0.423203	0.672147
ENSMUSG00000040040	Ift88	protein_coding	-1.58306	5.78949	6.6941	0	0.927259	0.314819	0.752899
ENSMUSG00000055172	C1ra	protein_coding	3.30182	5.74426	6.73933	3.30182	5.09662	4.38649	1.15194e-05
ENSMUSG00000074622	Mafb	protein_coding	2.80428	5.74426	6.60364	2.80428	4.96212	4.25164	2.12211e-05
ENSMUSG00000027186	Elf5	protein_coding	2.39721	5.74426	6.64887	2.39721	4.49393	3.76869	0.000164106
ENSMUSG00000040699	Limd2	protein_coding	1.76399	5.74426	6.78456	1.76399	4.24478	3.5083	0.000450973
ENSMUSG00000059981	Taok2	protein_coding	3.03044	5.74426	6.78456	3.03044	3.5795	2.81418	0.00489019
ENSMUSG00000034220	Gpc1	protein_coding	3.30182	5.74426	6.78456	3.30182	3.4818	2.71026	0.00672304
ENSMUSG00000104802	Gm5869	processed_pseudogene	1.89968	5.74426	6.64887	1.89968	3.26815	2.49515	0.0125902
ENSMUSG00000033083	Tbc1d4	protein_coding	3.16613	5.74426	6.87502	3.16613	3.18262	2.40762	0.0160569
ENSMUSG00000022261	Sdc2	protein_coding	2.0806	5.74426	6.78456	2.0806	3.05676	2.27429	0.0229485
ENSMUSG00000027472	Pdrg1	protein_coding	1.94491	5.74426	6.82979	1.94491	2.95778	2.17114	0.0299207
ENSMUSG00000021217	Tshz3	protein_coding	0.904608	5.74426	6.46795	0.904608	2.92045	2.13379	0.0328603
ENSMUSG00000039740	Alg2	protein_coding	2.03537	5.74426	6.96548	2.03537	2.86636	2.07791	0.0377172
ENSMUSG00000108353	Gm45205	TEC	1.44737	5.74426	6.82979	1.44737	2.77161	1.97866	0.0478547
ENSMUSG00000028238	Atp6v0d2	protein_coding	0.995069	5.74426	6.73933	0.995069	2.61699	1.82146	0.0685369
ENSMUSG00000033705	Stard9	protein_coding	0.949838	5.74426	6.64887	0.949838	2.5636	1.76587	0.0774176
ENSMUSG00000078870	Gm14410	protein_coding	0.497534	5.74426	6.78456	0.497534	2.25845	1.45788	0.144874
ENSMUSG00000034157	Cipc	protein_coding	0.316613	5.74426	6.73933	0.316613	2.23035	1.43286	0.151898
ENSMUSG00000022584	Ly6c2	protein_coding	0.0452304	5.74426	6.64887	0.0452304	2.17653	1.3802	0.167525
ENSMUSG00000026696	Vamp4	protein_coding	0.271382	5.74426	6.96548	0.271382	2.14862	1.35331	0.175957
ENSMUSG00000021952	Xpo4	protein_coding	0.316613	5.74426	6.6941	0.316613	2.07436	1.28318	0.19943
ENSMUSG00000002332	Dhrs1	protein_coding	0.0904608	5.74426	6.64887	0.0904608	2.04455	1.25449	0.209664
ENSMUSG00000026563	Tada1	protein_coding	-0.271382	5.74426	6.82979	0	1.83257	1.05736	0.290346
ENSMUSG00000020840	Blmh	protein_coding	-0.361843	5.74426	6.46795	0	1.72864	0.963338	0.335378
ENSMUSG00000027993	Trim2	protein_coding	-1.4926	5.74426	6.64887	0	1.50629	0.767505	0.442782
ENSMUSG00000040928	S100pbp	protein_coding	-0.949838	5.74426	6.6941	0	1.39481	0.670702	0.50241
ENSMUSG00000001999	Blvra	protein_coding	-0.859378	5.74426	6.73933	0	1.36681	0.64321	0.520088
ENSMUSG00000025747	Tyms	protein_coding	-0.814147	5.74426	7.1464	0	1.3072	0.594476	0.552194
ENSMUSG00000028698	Pik3r3	protein_coding	-1.13076	5.74426	6.78456	0	1.2527	0.550619	0.581895
ENSMUSG00000047789	Slc38a9	protein_coding	-1.40214	5.74426	6.6941	0	1.07039	0.412514	0.679963
ENSMUSG00000050737	Ptges	protein_coding	3.66366	5.69903	6.92025	3.66366	5.36234	4.64194	3.45154e-06
ENSMUSG00000027380	Acoxl	protein_coding	3.70889	5.69903	6.92025	3.70889	5.3503	4.63276	3.60818e-06
ENSMUSG00000071713	Csf2rb	protein_coding	3.88981	5.69903	6.87502	3.88981	5.08559	4.37437	1.21782e-05
ENSMUSG00000036103	Colec12	protein_coding	3.48274	5.69903	6.6941	3.48274	4.87709	4.16731	3.08214e-05
ENSMUSG00000040560	Wdr7	protein_coding	3.79935	5.69903	6.87502	3.79935	4.31426	3.58338	0.000339177
ENSMUSG00000055799	Tcf7l1	protein_coding	3.5732	5.69903	6.92025	3.5732	4.20077	3.4652	0.00052983
ENSMUSG00000105019	Gm43547	TEC	3.52797	5.69903	6.73933	3.52797	3.8127	3.05704	0.00223538
ENSMUSG00000059498	Fcgr3	protein_coding	0.316613	5.69903	6.87502	0.316613	3.43233	2.66216	0.00776405
ENSMUSG00000043183	Simc1	protein_coding	2.39721	5.69903	6.60364	2.39721	3.05629	2.27399	0.0229663
ENSMUSG00000044252	Osbpl1a	protein_coding	2.48767	5.69903	6.82979	2.48767	3.01518	2.23199	0.0256154
ENSMUSG00000022091	Sorbs3	protein_coding	1.13076	5.69903	6.60364	1.13076	2.92603	2.1385	0.0324764
ENSMUSG00000016128	Stard13	protein_coding	1.71876	5.69903	6.55841	1.71876	2.77101	1.97835	0.0478896
ENSMUSG00000104315	Gm37906	TEC	1.13076	5.69903	6.64887	1.13076	2.63634	1.84273	0.0653687
ENSMUSG00000038608	Dock10	protein_coding	2.0806	5.69903	6.92025	2.0806	2.61486	1.81972	0.0688023
ENSMUSG00000050777	Tmem37	protein_coding	1.26645	5.69903	6.73933	1.26645	2.56671	1.76867	0.0769484
ENSMUSG00000038145	Snrk	protein_coding	1.22122	5.69903	6.6941	1.22122	2.53122	1.73515	0.0827151
ENSMUSG00000055866	Per2	protein_coding	0.814147	5.69903	6.64887	0.814147	2.46655	1.66661	0.0955911
ENSMUSG00000005949	Ctns	protein_coding	0.995069	5.69903	6.64887	0.995069	2.44823	1.64931	0.0990848
ENSMUSG00000022475	Hdac7	protein_coding	0.633226	5.69903	6.60364	0.633226	2.39673	1.5934	0.11107
ENSMUSG00000037949	Ano10	protein_coding	0.407074	5.69903	6.82979	0.407074	2.19952	1.40141	0.16109
ENSMUSG00000024270	Slc39a6	protein_coding	0.271382	5.69903	6.6941	0.271382	2.16705	1.37022	0.170619
ENSMUSG00000039483	Asb6	protein_coding	0.0904608	5.69903	6.64887	0.0904608	2.11428	1.32308	0.185809
ENSMUSG00000049792	Bag5	protein_coding	0.0452304	5.69903	6.73933	0.0452304	2.02019	1.23364	0.217338
ENSMUSG00000011958	Bnip2	protein_coding	0.0904608	5.69903	6.6941	0.0904608	2.01581	1.22977	0.218782
ENSMUSG00000018541	Cwc25	protein_coding	0	5.69903	6.6941	0	1.98172	1.19799	0.23092
ENSMUSG00000097230	Gm26853	lincRNA	-0.0452304	5.69903	6.6941	0	1.952	1.16917	0.242336
ENSMUSG00000063047	Zfp780b	protein_coding	-0.316613	5.69903	6.82979	0	1.88019	1.10207	0.270432
ENSMUSG00000045690	Wdr89	protein_coding	-0.135691	5.69903	6.55841	0	1.83062	1.05639	0.290789
ENSMUSG00000050244	Heatr1	protein_coding	-0.361843	5.69903	6.78456	0	1.82132	1.04801	0.294636
ENSMUSG00000042063	Zfp386	protein_coding	-0.452304	5.69903	6.78456	0	1.71966	0.95399	0.340089
ENSMUSG00000097006	9530082P21Rik	lincRNA	-1.35691	5.69903	6.42272	0	1.19454	0.506189	0.612724
ENSMUSG00000027905	Ddx20	protein_coding	-1.67352	5.69903	6.55841	0	1.07778	0.417385	0.676397
ENSMUSG00000017686	Rhot1	protein_coding	-4.43258	5.69903	6.55841	0	1.01307	0.37431	0.708173
ENSMUSG00000070287	Slc35g2	protein_coding	-1.99014	5.69903	6.37749	0	0.864927	0.271688	0.785862
ENSMUSG00000079065	BC005561	protein_coding	-1.94491	5.69903	6.55841	0	0.791602	0.224471	0.822391
ENSMUSG00000037071	Scd1	protein_coding	4.6135	5.6538	11.3981	4.6135	7.16081	6.40843	1.47028e-10
ENSMUSG00000044468	Fam46c	protein_coding	3.79935	5.6538	6.55841	3.79935	5.36178	4.64194	3.45154e-06
ENSMUSG00000031548	Sfrp1	protein_coding	3.1209	5.6538	6.55841	3.1209	5.19168	4.47423	7.6686e-06
ENSMUSG00000035493	Tgfbi	protein_coding	3.66366	5.6538	6.78456	3.66366	5.11214	4.40159	1.07461e-05
ENSMUSG00000030588	Yif1b	protein_coding	3.79935	5.6538	6.82979	3.79935	5.02621	4.31699	1.58171e-05
ENSMUSG00000019368	Sec14l4	protein_coding	1.99014	5.6538	6.60364	1.99014	4.75233	4.04377	5.2598e-05
ENSMUSG00000028047	Thbs3	protein_coding	3.75412	5.6538	6.92025	3.75412	4.51206	3.7868	0.000152598
ENSMUSG00000063558	Aox1	protein_coding	0.904608	5.6538	6.64887	0.904608	4.34448	3.61309	0.000302573
ENSMUSG00000041075	Fzd7	protein_coding	3.1209	5.6538	6.92025	3.1209	3.9324	3.17951	0.00147526
ENSMUSG00000047193	Dync2h1	protein_coding	3.07567	5.6538	6.82979	3.07567	3.70629	2.94924	0.00318556
ENSMUSG00000051048	P4ha3	protein_coding	3.25659	5.6538	6.55841	3.25659	3.64929	2.88841	0.00387189
ENSMUSG00000065767	Gm23849	snRNA	2.12583	5.6538	6.60364	2.12583	3.23953	2.46586	0.0136683
ENSMUSG00000065251	Gm23971	snRNA	2.12583	5.6538	6.60364	2.12583	3.23953	2.46586	0.0136683
ENSMUSG00000064702	Gm24950	snRNA	2.12583	5.6538	6.60364	2.12583	3.23953	2.46586	0.0136683
ENSMUSG00000065944	Rnu2-10	snRNA	2.12583	5.6538	6.60364	2.12583	3.23953	2.46586	0.0136683
ENSMUSG00000032540	Abhd5	protein_coding	2.12583	5.6538	6.6941	2.12583	2.83931	2.05113	0.0402545
ENSMUSG00000040929	Rfx3	protein_coding	1.71876	5.6538	6.82979	1.71876	2.82647	2.03759	0.0415911
ENSMUSG00000037553	Zdhhc18	protein_coding	0.542765	5.6538	6.55841	0.542765	2.75697	1.9628	0.0496689
ENSMUSG00000032038	St3gal4	protein_coding	1.13076	5.6538	6.60364	1.13076	2.72644	1.93259	0.053287
ENSMUSG00000051413	Plagl2	protein_coding	1.62829	5.6538	6.55841	1.62829	2.67021	1.87765	0.0604297
ENSMUSG00000094392	Gm3788	processed_pseudogene	1.99014	5.6538	6.64887	1.99014	2.62575	1.83117	0.0670754
ENSMUSG00000045763	Basp1	protein_coding	2.0806	5.6538	6.82979	2.0806	2.59721	1.80195	0.071554
ENSMUSG00000091957	Rps2-ps10	transcribed_processed_pseudogene	0.316613	5.6538	6.55841	0.316613	2.26147	1.46018	0.14424
ENSMUSG00000023965	Fbxl17	protein_coding	0.0904608	5.6538	6.6941	0.0904608	2.00629	1.2203	0.22235
ENSMUSG00000058709	Egln2	protein_coding	-0.226152	5.6538	6.55841	0	1.9019	1.12057	0.262469
ENSMUSG00000022960	Donson	protein_coding	-0.361843	5.6538	6.6941	0	1.79291	1.02428	0.305702
ENSMUSG00000040250	Asun	protein_coding	-0.949838	5.6538	6.60364	0	1.67711	0.917213	0.359031
ENSMUSG00000058444	Map2k5	protein_coding	-1.62829	5.6538	6.55841	0	1.59062	0.841163	0.400257
ENSMUSG00000033589	Reep4	protein_coding	-3.39228	5.6538	6.46795	0	0.679184	0.157621	0.874756
ENSMUSG00000041577	Prelp	protein_coding	4.20643	5.60857	6.78456	4.20643	5.54274	4.81688	1.45823e-06
ENSMUSG00000019992	Mtfr2	protein_coding	3.43751	5.60857	6.60364	3.43751	5.18685	4.47049	7.80412e-06
ENSMUSG00000028218	Fam92a	protein_coding	3.48274	5.60857	6.73933	3.48274	4.9589	4.24896	2.14761e-05
ENSMUSG00000009114	2610028H24Rik	protein_coding	3.61843	5.60857	6.92025	3.61843	4.48015	3.75476	0.000173506
ENSMUSG00000053093	Myh7	protein_coding	4.07074	5.60857	6.73933	4.07074	4.35024	3.61858	0.000296219
ENSMUSG00000027435	Cd93	protein_coding	2.21629	5.60857	6.6941	2.21629	3.49346	2.7209	0.00651045
ENSMUSG00000108368	Gm45053	TEC	0.633226	5.60857	6.64887	0.633226	3.42508	2.6545	0.00794256
ENSMUSG00000001039	B9d1	protein_coding	3.16613	5.60857	6.6941	3.16613	3.38291	2.61204	0.00900043
ENSMUSG00000024163	Mapk8ip3	protein_coding	3.07567	5.60857	6.60364	3.07567	3.30544	2.53366	0.0112878
ENSMUSG00000089715	Cbx6	protein_coding	2.93998	5.60857	6.82979	2.93998	3.24526	2.47054	0.0134909
ENSMUSG00000022971	Ifnar2	protein_coding	1.40214	5.60857	6.92025	1.40214	2.74705	1.95429	0.0506666
ENSMUSG00000040537	Adam22	protein_coding	1.0403	5.60857	6.51318	1.0403	2.66648	1.87381	0.060956
ENSMUSG00000030287	Itpr2	protein_coding	1.62829	5.60857	6.60364	1.62829	2.65576	1.86375	0.0623563
ENSMUSG00000021067	Sav1	protein_coding	1.0403	5.60857	6.60364	1.0403	2.46065	1.66179	0.0965541
ENSMUSG00000039234	Sec24d	protein_coding	0.859378	5.60857	6.78456	0.859378	2.41138	1.60961	0.107483
ENSMUSG00000086350	B230369F24Rik	antisense	0.678456	5.60857	6.64887	0.678456	2.3599	1.55833	0.119155
ENSMUSG00000026708	Cenpl	protein_coding	0.271382	5.60857	6.73933	0.271382	2.20361	1.4053	0.159934
ENSMUSG00000034064	Poglut1	protein_coding	-0.0904608	5.60857	6.60364	0	1.91948	1.13772	0.255237
ENSMUSG00000024542	Cep192	protein_coding	-0.316613	5.60857	6.51318	0	1.81407	1.04236	0.297243
ENSMUSG00000024273	2700062C07Rik	protein_coding	-0.316613	5.60857	6.78456	0	1.81084	1.03905	0.298781
ENSMUSG00000049866	Arl4c	protein_coding	-0.587995	5.60857	6.73933	0	1.7013	0.939061	0.347699
ENSMUSG00000096519	Gm10721	protein_coding	-0.497534	5.60857	6.64887	0	1.67745	0.917213	0.359031
ENSMUSG00000042197	Zfp451	protein_coding	-0.995069	5.60857	6.6941	0	1.32435	0.610451	0.541563
ENSMUSG00000071230	Npw	protein_coding	2.66859	5.56334	6.51318	2.66859	4.57298	3.85263	0.000116855
ENSMUSG00000024909	Efemp2	protein_coding	2.17106	5.56334	6.46795	2.17106	4.44793	3.71961	0.000199534
ENSMUSG00000040852	Plekhh2	protein_coding	3.98028	5.56334	6.82979	3.98028	4.42562	3.69912	0.00021635
ENSMUSG00000026817	Ak1	protein_coding	1.40214	5.56334	6.55841	1.40214	4.19729	3.46189	0.000536389
ENSMUSG00000021186	Fbln5	protein_coding	3.66366	5.56334	6.60364	3.66366	3.81793	3.06226	0.00219673
ENSMUSG00000022637	Cblb	protein_coding	3.03044	5.56334	6.73933	3.03044	3.54196	2.77319	0.00555103
ENSMUSG00000040209	Zfp704	protein_coding	2.98521	5.56334	6.78456	2.98521	3.49103	2.71962	0.00653565
ENSMUSG00000095427	Rps2-ps6	protein_coding	1.44737	5.56334	6.55841	1.44737	3.47064	2.69918	0.00695096
ENSMUSG00000001173	Ocrl	protein_coding	1.71876	5.56334	6.64887	1.71876	3.1259	2.35062	0.018742
ENSMUSG00000030077	Chl1	protein_coding	0.587995	5.56334	6.82979	0.587995	2.88974	2.10325	0.0354435
ENSMUSG00000000782	Tcf7	protein_coding	2.39721	5.56334	6.51318	2.39721	2.84442	2.0552	0.0398597
ENSMUSG00000025366	Esyt1	protein_coding	1.71876	5.56334	6.60364	1.71876	2.79859	2.00839	0.0446016
ENSMUSG00000081344	Gm14303	processed_pseudogene	1.44737	5.56334	6.46795	1.44737	2.69371	1.90174	0.0572058
ENSMUSG00000027465	Tbc1d20	protein_coding	1.35691	5.56334	6.55841	1.35691	2.60787	1.81241	0.0699235
ENSMUSG00000029640	Usp12	protein_coding	0.995069	5.56334	6.60364	0.995069	2.53082	1.73503	0.0827354
ENSMUSG00000048371	Pdp2	protein_coding	0.904608	5.56334	6.73933	0.904608	2.52604	1.73085	0.0834791
ENSMUSG00000033016	Nfatc1	protein_coding	0.678456	5.56334	6.6941	0.678456	2.38665	1.58359	0.113287
ENSMUSG00000050079	Rspry1	protein_coding	0.633226	5.56334	6.64887	0.633226	2.30918	1.50821	0.131501
ENSMUSG00000103996	4833421G17Rik	TEC	0.814147	5.56334	6.55841	0.814147	2.24469	1.44609	0.148152
ENSMUSG00000038497	Tmco3	protein_coding	0.226152	5.56334	6.60364	0.226152	2.12022	1.32783	0.184235
ENSMUSG00000021147	Wdr37	protein_coding	0.316613	5.56334	6.46795	0.316613	2.09584	1.30447	0.192073
ENSMUSG00000027628	Aar2	protein_coding	-1.08553	5.56334	6.46795	0	1.67463	0.914264	0.360578
ENSMUSG00000050668	Gpatch11	protein_coding	-1.44737	5.56334	6.51318	0	1.40986	0.682347	0.495019
ENSMUSG00000036885	Arhgef26	protein_coding	-2.17106	5.56334	6.37749	0	0.546314	0.0888908	0.929169
ENSMUSG00000022150	Dab2	protein_coding	3.43751	5.51811	6.73933	3.43751	5.24037	4.52277	6.10359e-06
ENSMUSG00000024621	Csf1r	protein_coding	2.75905	5.51811	6.64887	2.75905	4.76707	4.0566	4.97921e-05
ENSMUSG00000045362	Tnfrsf26	protein_coding	2.12583	5.51811	6.46795	2.12583	4.53503	3.81097	0.000138421
ENSMUSG00000039987	Phtf2	protein_coding	1.53783	5.51811	6.55841	1.53783	4.35844	3.62696	0.000286776
ENSMUSG00000023046	Igfbp6	protein_coding	3.16613	5.51811	6.51318	3.16613	3.91693	3.16412	0.00155554
ENSMUSG00000070056	Mfhas1	protein_coding	0.271382	5.51811	6.46795	0.271382	3.40357	2.63211	0.00848552
ENSMUSG00000056749	Nfil3	protein_coding	3.03044	5.51811	6.64887	3.03044	3.31829	2.5461	0.0108934
ENSMUSG00000034518	Hmgxb4	protein_coding	2.98521	5.51811	6.92025	2.98521	3.26201	2.4884	0.0128318
ENSMUSG00000038175	Mylip	protein_coding	3.1209	5.51811	6.78456	3.1209	3.06326	2.28167	0.022509
ENSMUSG00000037197	Rbm17	protein_coding	1.26645	5.51811	6.64887	1.26645	2.73461	1.94162	0.0521829
ENSMUSG00000055148	Klf2	protein_coding	1.62829	5.51811	6.64887	1.62829	2.71454	1.92162	0.0546542
ENSMUSG00000034771	Tle2	protein_coding	0.361843	5.51811	6.51318	0.361843	2.69722	1.90424	0.0568793
ENSMUSG00000022912	Pros1	protein_coding	0.226152	5.51811	6.33226	0.226152	2.45459	1.65634	0.0976521
ENSMUSG00000039989	Cbx4	protein_coding	0.768917	5.51811	6.60364	0.768917	2.43109	1.63208	0.102662
ENSMUSG00000041000	Trim62	protein_coding	0.452304	5.51811	6.73933	0.452304	2.26672	1.46565	0.142744
ENSMUSG00000028191	Bcl10	protein_coding	0.135691	5.51811	6.51318	0.135691	2.07128	1.28119	0.200128
ENSMUSG00000035236	Scai	protein_coding	0.135691	5.51811	6.55841	0.135691	2.03486	1.24561	0.212908
ENSMUSG00000028179	Cth	protein_coding	0.0452304	5.51811	6.46795	0.0452304	1.98797	1.2025	0.229169
ENSMUSG00000026028	Trak2	protein_coding	-0.0452304	5.51811	6.51318	0	1.94855	1.16608	0.243581
ENSMUSG00000022779	Top3b	protein_coding	-0.135691	5.51811	6.64887	0	1.89795	1.11709	0.263956
ENSMUSG00000106706	C530043K16Rik	TEC	-0.180922	5.51811	6.64887	0	1.88024	1.10207	0.270432
ENSMUSG00000080316	Spaca6	protein_coding	-0.180922	5.51811	6.51318	0	1.84384	1.06739	0.285794
ENSMUSG00000032547	Ryk	protein_coding	-0.180922	5.51811	6.42272	0	1.8292	1.05515	0.291357
ENSMUSG00000024235	Map3k8	protein_coding	-0.407074	5.51811	6.55841	0	1.78952	1.02052	0.307483
ENSMUSG00000074733	Zfp950	protein_coding	-0.226152	5.51811	6.51318	0	1.73044	0.964756	0.334667
ENSMUSG00000097234	Gm26518	lincRNA	-0.768917	5.51811	6.42272	0	1.52633	0.78243	0.433962
ENSMUSG00000021518	Ptdss1	protein_coding	-2.89475	5.51811	6.46795	0	1.45813	0.726014	0.46783
ENSMUSG00000010453	Kansl3	protein_coding	-1.31168	5.51811	6.51318	0	1.37468	0.649259	0.516171
ENSMUSG00000024120	Lrpprc	protein_coding	-1.08553	5.51811	6.42272	0	1.35096	0.631066	0.527998
ENSMUSG00000032913	Lrig2	protein_coding	-4.02551	5.51811	6.46795	0	1.24664	0.547237	0.584216
ENSMUSG00000025583	Rptor	protein_coding	-1.17599	5.51811	6.51318	0	1.21033	0.519348	0.603518
ENSMUSG00000022898	Dscr3	protein_coding	-1.13076	5.51811	6.42272	0	1.19931	0.510423	0.609755
ENSMUSG00000041231	Ublcp1	protein_coding	-1.4926	5.51811	6.51318	0	0.809104	0.233808	0.815134
ENSMUSG00000038533	Cbfa2t2	protein_coding	-1.62829	5.51811	6.51318	0	0.791624	0.224471	0.822391
ENSMUSG00000038729	Akap2	protein_coding	3.70889	5.47288	6.60364	3.70889	5.37372	4.65091	3.3048e-06
ENSMUSG00000020437	Myo1g	protein_coding	2.98521	5.47288	6.46795	2.98521	5.07631	4.36592	1.26586e-05
ENSMUSG00000020525	Ppm1d	protein_coding	1.94491	5.47288	6.46795	1.94491	4.41743	3.69081	0.000223544
ENSMUSG00000020017	Hal	protein_coding	2.80428	5.47288	6.55841	2.80428	4.26372	3.52864	0.000417693
ENSMUSG00000066456	Hmgn3	protein_coding	3.30182	5.47288	6.60364	3.30182	4.00554	3.26022	0.00111327
ENSMUSG00000053716	Dusp7	protein_coding	3.25659	5.47288	6.64887	3.25659	3.93606	3.18319	0.00145664
ENSMUSG00000024429	Gnl1	protein_coding	2.5329	5.47288	6.64887	2.5329	3.04247	2.25937	0.0238603
ENSMUSG00000038437	Mllt6	protein_coding	1.35691	5.47288	6.46795	1.35691	3.02368	2.23898	0.0251573
ENSMUSG00000030741	Spns1	protein_coding	2.30675	5.47288	6.73933	2.30675	2.99592	2.21151	0.0270008
ENSMUSG00000036931	Nfkbid	protein_coding	1.53783	5.47288	6.51318	1.53783	2.83409	2.04634	0.0407225
ENSMUSG00000027122	Arl14ep	protein_coding	2.03537	5.47288	6.87502	2.03537	2.82381	2.03441	0.04191
ENSMUSG00000040596	Pogk	protein_coding	1.71876	5.47288	6.64887	1.71876	2.82076	2.03158	0.0421961
ENSMUSG00000052798	Nup107	protein_coding	0.587995	5.47288	6.51318	0.587995	2.76454	1.9713	0.04869
ENSMUSG00000056267	Cep70	protein_coding	0.226152	5.47288	6.46795	0.226152	2.5394	1.74278	0.0813726
ENSMUSG00000066270	Gm10157	processed_pseudogene	0.542765	5.47288	6.55841	0.542765	2.25468	1.4548	0.145724
ENSMUSG00000021901	Bap1	protein_coding	0.542765	5.47288	6.6941	0.542765	2.25035	1.45144	0.146657
ENSMUSG00000021311	Mtr	protein_coding	0.678456	5.47288	6.33226	0.678456	2.21703	1.42085	0.15536
ENSMUSG00000063172	Hspb11	protein_coding	0.407074	5.47288	6.64887	0.407074	2.19211	1.39477	0.163086
ENSMUSG00000068742	Cry2	protein_coding	0.361843	5.47288	6.51318	0.361843	2.14905	1.35364	0.175851
ENSMUSG00000042742	B630005N14Rik	protein_coding	0.0904608	5.47288	6.6941	0.0904608	2.02051	1.23364	0.217338
ENSMUSG00000021661	Ankra2	protein_coding	0.0452304	5.47288	6.51318	0.0452304	1.99654	1.21157	0.225677
ENSMUSG00000074749	Kiz	protein_coding	-0.135691	5.47288	6.64887	0	1.9096	1.12707	0.259712
ENSMUSG00000050088	1600012H06Rik	protein_coding	-0.497534	5.47288	6.51318	0	1.75016	0.982785	0.325713
ENSMUSG00000002660	Clpp	protein_coding	-0.542765	5.47288	6.51318	0	1.64439	0.882986	0.377244
ENSMUSG00000078185	Chml	protein_coding	-1.17599	5.47288	6.46795	0	1.60249	0.850201	0.395214
ENSMUSG00000040434	Gyltl1b	protein_coding	-0.949838	5.47288	6.55841	0	1.54299	0.796927	0.425494
ENSMUSG00000047832	Cdca4	protein_coding	-0.407074	5.47288	6.51318	0	1.48416	0.749193	0.453741
ENSMUSG00000036814	Slc6a20a	protein_coding	-1.0403	5.47288	6.33226	0	1.4622	0.729495	0.465699
ENSMUSG00000037315	Jade3	protein_coding	-1.08553	5.47288	6.60364	0	1.38165	0.656522	0.511488
ENSMUSG00000034021	Pds5b	protein_coding	-0.949838	5.47288	6.42272	0	1.36983	0.645953	0.51831
ENSMUSG00000029270	Fam69a	protein_coding	-1.71876	5.47288	6.42272	0	1.33127	0.615257	0.538385
ENSMUSG00000027428	Rbbp9	protein_coding	-3.52797	5.47288	6.33226	0	1.27884	0.57196	0.567349
ENSMUSG00000031714	Gab1	protein_coding	-1.62829	5.47288	6.46795	0	1.25282	0.550619	0.581895
ENSMUSG00000003344	Btbd2	protein_coding	-2.71382	5.47288	6.37749	0	1.17283	0.489908	0.624199
ENSMUSG00000078517	Emc1	protein_coding	-1.31168	5.47288	6.42272	0	1.09168	0.425465	0.670497
ENSMUSG00000018819	Lsp1	protein_coding	3.52797	5.42765	6.60364	3.52797	5.20391	4.48707	7.22106e-06
ENSMUSG00000040751	Lat2	protein_coding	2.62336	5.42765	6.55841	2.62336	5.03755	4.32735	1.50913e-05
ENSMUSG00000029463	Fam216a	protein_coding	3.52797	5.42765	6.6941	3.52797	4.91379	4.20291	2.635e-05
ENSMUSG00000020176	Grb10	protein_coding	3.03044	5.42765	6.6941	3.03044	4.75577	4.04635	5.20234e-05
ENSMUSG00000027843	Ptpn22	protein_coding	3.93504	5.42765	6.51318	3.93504	4.29749	3.56609	0.000362348
ENSMUSG00000051331	Cacna1c	protein_coding	3.16613	5.42765	6.51318	3.16613	4.26267	3.52783	0.000418987
ENSMUSG00000098557	Kctd12	protein_coding	3.21136	5.42765	6.60364	3.21136	4.2405	3.50449	0.000457489
ENSMUSG00000026185	Igfbp5	protein_coding	1.58306	5.42765	6.37749	1.58306	4.2307	3.49494	0.000474161
ENSMUSG00000071550	Cfap44	protein_coding	0.995069	5.42765	6.33226	0.995069	4.20335	3.46787	0.000524607
ENSMUSG00000071001	Hrct1	protein_coding	2.39721	5.42765	6.46795	2.39721	3.85778	3.10261	0.0019182
ENSMUSG00000033066	Gas7	protein_coding	1.94491	5.42765	6.46795	1.94491	3.69096	2.93412	0.00334498
ENSMUSG00000078249	Hmga1-rs1	protein_coding	2.75905	5.42765	6.46795	2.75905	3.68565	2.9287	0.00340381
ENSMUSG00000026394	Atp6v1g3	protein_coding	2.98521	5.42765	6.6941	2.98521	3.49962	2.72784	0.00637513
ENSMUSG00000052137	Rbm12b2	protein_coding	3.48274	5.42765	6.42272	3.48274	3.47399	2.70265	0.00687887
ENSMUSG00000023235	Ccl25	protein_coding	3.07567	5.42765	6.46795	3.07567	3.38427	2.6134	0.00896465
ENSMUSG00000030134	Rasgef1a	protein_coding	0.226152	5.42765	6.55841	0.226152	3.30918	2.53728	0.0111719
ENSMUSG00000038151	Prdm1	protein_coding	2.39721	5.42765	6.42272	2.39721	3.14484	2.36956	0.0178091
ENSMUSG00000021713	Ppwd1	protein_coding	2.0806	5.42765	6.64887	2.0806	3.12875	2.35381	0.0185823
ENSMUSG00000032715	Trib3	protein_coding	0.271382	5.42765	6.37749	0.271382	2.69844	1.90484	0.0568004
ENSMUSG00000020900	Myh10	protein_coding	1.35691	5.42765	6.51318	1.35691	2.61261	1.81754	0.0691348
ENSMUSG00000020080	Hkdc1	protein_coding	0.949838	5.42765	6.51318	0.949838	2.59387	1.79887	0.0720385
ENSMUSG00000020140	Lgr5	protein_coding	1.53783	5.42765	6.55841	1.53783	2.59091	1.79601	0.0724923
ENSMUSG00000091625	Lsm5	protein_coding	0.949838	5.42765	6.51318	0.949838	2.43343	1.63471	0.102109
ENSMUSG00000022817	Itgb5	protein_coding	0.904608	5.42765	6.51318	0.904608	2.40868	1.60699	0.108058
ENSMUSG00000003604	Aven	protein_coding	0.361843	5.42765	6.51318	0.361843	2.15418	1.35908	0.174121
ENSMUSG00000045414	1190002N15Rik	protein_coding	-0.0904608	5.42765	6.42272	0	1.91137	1.12891	0.258935
ENSMUSG00000038279	Nop2	protein_coding	-0.135691	5.42765	6.42272	0	1.87909	1.10094	0.270922
ENSMUSG00000031723	Txnl4b	protein_coding	-0.452304	5.42765	6.51318	0	1.77957	1.01158	0.311738
ENSMUSG00000037447	Arid5a	protein_coding	-0.407074	5.42765	6.51318	0	1.76761	1.00054	0.317051
ENSMUSG00000029034	Cpsf3l	protein_coding	-0.678456	5.42765	6.33226	0	1.74129	0.974055	0.330029
ENSMUSG00000033478	Fam160b1	protein_coding	-0.452304	5.42765	6.46795	0	1.73479	0.968284	0.332903
ENSMUSG00000101188	Eif4a-ps4	processed_pseudogene	-0.633226	5.42765	6.51318	0	1.62856	0.87081	0.383858
ENSMUSG00000022673	Mcm4	protein_coding	-0.587995	5.42765	6.51318	0	1.53593	0.790333	0.429333
ENSMUSG00000001143	Lman2l	protein_coding	-0.995069	5.42765	6.55841	0	1.49325	0.756451	0.449379
ENSMUSG00000021819	Zswim8	protein_coding	-1.13076	5.42765	6.33226	0	1.3122	0.599238	0.549014
ENSMUSG00000032342	Mto1	protein_coding	-1.26645	5.42765	6.28703	0	1.12781	0.455608	0.648672
ENSMUSG00000086290	Snhg12	lincRNA	-1.31168	5.42765	6.46795	0	1.08007	0.418518	0.675568
ENSMUSG00000040354	Mars	protein_coding	-1.53783	5.42765	6.46795	0	1.06684	0.411085	0.68101
ENSMUSG00000024691	Fam111a	protein_coding	-1.67352	5.42765	6.60364	0	0.970726	0.344021	0.73083
ENSMUSG00000024640	Psat1	protein_coding	-1.53783	5.42765	6.19656	0	0.69087	0.163026	0.870498
ENSMUSG00000028970	Abcb1b	protein_coding	-4.47781	5.42765	6.28703	0	0.672112	0.154038	0.87758
ENSMUSG00000057335	Cep170	protein_coding	3.88981	5.38242	6.55841	3.88981	5.45621	4.73296	2.21265e-06
ENSMUSG00000103824	Gm38177	TEC	3.70889	5.38242	6.42272	3.70889	5.39279	4.66861	3.03241e-06
ENSMUSG00000033610	Pank1	protein_coding	3.61843	5.38242	6.60364	3.61843	5.3476	4.63032	3.65095e-06
ENSMUSG00000034593	Myo5a	protein_coding	3.66366	5.38242	6.60364	3.66366	5.33628	4.61868	3.86197e-06
ENSMUSG00000001473	Tubb6	protein_coding	3.5732	5.38242	6.55841	3.5732	5.2641	4.54593	5.46939e-06
ENSMUSG00000002602	Axl	protein_coding	3.52797	5.38242	6.42272	3.52797	5.12678	4.41495	1.01032e-05
ENSMUSG00000020589	Fam49a	protein_coding	2.71382	5.38242	6.37749	2.71382	5.01534	4.30715	1.65368e-05
ENSMUSG00000073889	Il11ra1	protein_coding	2.48767	5.38242	6.37749	2.48767	5.01243	4.30486	1.67088e-05
ENSMUSG00000048865	Arhgap30	protein_coding	3.30182	5.38242	6.51318	3.30182	4.31083	3.58018	0.000343362
ENSMUSG00000029167	Ppargc1a	protein_coding	2.71382	5.38242	6.55841	2.71382	3.71452	2.95784	0.00309806
ENSMUSG00000024299	Adamts10	protein_coding	3.30182	5.38242	6.51318	3.30182	3.34315	2.57342	0.01007
ENSMUSG00000030084	Plxna1	protein_coding	3.03044	5.38242	6.60364	3.03044	3.2296	2.45621	0.0140413
ENSMUSG00000037606	Osbpl5	protein_coding	2.12583	5.38242	6.37749	2.12583	3.2126	2.43732	0.0147966
ENSMUSG00000052056	Zfp217	protein_coding	2.12583	5.38242	6.51318	2.12583	3.01014	2.22627	0.0259964
ENSMUSG00000024350	Dnajc18	protein_coding	2.17106	5.38242	6.55841	2.17106	2.89578	2.10932	0.0349166
ENSMUSG00000041515	Irf8	protein_coding	0.361843	5.38242	6.51318	0.361843	2.7507	1.95795	0.0502357
ENSMUSG00000038059	Smim3	protein_coding	0.361843	5.38242	6.42272	0.361843	2.70311	1.9097	0.0561714
ENSMUSG00000028690	Mmachc	protein_coding	1.80922	5.38242	6.60364	1.80922	2.68678	1.89439	0.0581731
ENSMUSG00000032298	Neil1	protein_coding	0	5.38242	6.33226	0	1.99453	1.20967	0.226405
ENSMUSG00000005686	Ampd3	protein_coding	-0.0452304	5.38242	6.46795	0	1.95584	1.17339	0.24064
ENSMUSG00000020650	Bcap29	protein_coding	-0.0904608	5.38242	6.51318	0	1.93231	1.15073	0.249845
ENSMUSG00000031596	Slc7a2	protein_coding	-0.226152	5.38242	6.55841	0	1.87287	1.09466	0.273664
ENSMUSG00000037089	Slc35b2	protein_coding	-0.497534	5.38242	6.19656	0	1.77073	1.00338	0.315678
ENSMUSG00000059689	Zfp637	protein_coding	-0.904608	5.38242	6.37749	0	1.5288	0.783741	0.433192
ENSMUSG00000035245	Eogt	protein_coding	-1.4926	5.38242	6.46795	0	1.4872	0.751501	0.452351
ENSMUSG00000026857	Ntmt1	protein_coding	-1.71876	5.38242	6.2418	0	1.44999	0.720413	0.471271
ENSMUSG00000064090	Vrk2	protein_coding	-3.48274	5.38242	6.33226	0	1.24498	0.546468	0.584744
ENSMUSG00000014767	Tbp	protein_coding	-2.26152	5.38242	6.28703	0	0.929474	0.317194	0.751097
ENSMUSG00000036820	Amdhd2	protein_coding	-1.76399	5.38242	6.46795	0	0.890005	0.288839	0.772705
ENSMUSG00000074766	Ism1	protein_coding	2.5329	5.33719	6.33226	2.5329	4.98825	4.28018	1.86744e-05
ENSMUSG00000039196	Orm1	protein_coding	3.03044	5.33719	6.55841	3.03044	3.92301	3.1699	0.00152494
ENSMUSG00000041298	Katnal1	protein_coding	0.271382	5.33719	6.28703	0.271382	3.35206	2.5821	0.00982015
ENSMUSG00000005374	Tbl2	protein_coding	1.80922	5.33719	6.46795	1.80922	3.305	2.53366	0.0112878
ENSMUSG00000021301	Hecw1	protein_coding	2.93998	5.33719	6.37749	2.93998	3.1126	2.3362	0.0194811
ENSMUSG00000022488	Nckap1l	protein_coding	1.99014	5.33719	6.2418	1.99014	2.84089	2.05232	0.0401384
ENSMUSG00000005501	Usp40	protein_coding	1.80922	5.33719	6.42272	1.80922	2.78647	1.9948	0.0460651
ENSMUSG00000032965	Ift57	protein_coding	0.587995	5.33719	6.42272	0.587995	2.69826	1.90484	0.0568004
ENSMUSG00000051435	Fhad1	protein_coding	1.17599	5.33719	6.42272	1.17599	2.46611	1.66654	0.0956054
ENSMUSG00000036825	Ssx2ip	protein_coding	1.26645	5.33719	6.60364	1.26645	2.4067	1.60482	0.108533
ENSMUSG00000039230	Tbcd	protein_coding	0.723686	5.33719	6.42272	0.723686	2.3198	1.5173	0.129192
ENSMUSG00000009733	Tfcp2	protein_coding	0.678456	5.33719	6.37749	0.678456	2.21961	1.4239	0.154475
ENSMUSG00000030527	Crtc3	protein_coding	0.361843	5.33719	6.42272	0.361843	2.17193	1.37504	0.169119
ENSMUSG00000025408	Ddit3	protein_coding	0.0904608	5.33719	6.60364	0.0904608	2.03402	1.24527	0.213034
ENSMUSG00000033253	Szt2	protein_coding	0.0904608	5.33719	6.51318	0.0904608	2.01179	1.22596	0.220213
ENSMUSG00000024778	Fas	protein_coding	0.0452304	5.33719	6.28703	0.0452304	2.00151	1.21618	0.223916
ENSMUSG00000022540	Rogdi	protein_coding	-0.0904608	5.33719	6.46795	0	1.93685	1.15382	0.248574
ENSMUSG00000030839	Sergef	protein_coding	-0.0452304	5.33719	6.1061	0	1.92716	1.14633	0.251658
ENSMUSG00000034271	Jdp2	protein_coding	-0.226152	5.33719	6.51318	0	1.89551	1.11526	0.264739
ENSMUSG00000064127	Med14	protein_coding	-0.271382	5.33719	6.28703	0	1.83386	1.05858	0.289789
ENSMUSG00000066880	Zfp617	protein_coding	-0.180922	5.33719	6.37749	0	1.81106	1.03914	0.298738
ENSMUSG00000020948	Klhl28	protein_coding	-0.768917	5.33719	6.42272	0	1.63428	0.874223	0.381997
ENSMUSG00000005204	Senp3	protein_coding	-0.452304	5.33719	6.2418	0	1.61531	0.859514	0.390057
ENSMUSG00000092386	Gm20536	processed_transcript	-0.814147	5.33719	6.73933	0	1.40868	0.681198	0.495746
ENSMUSG00000026048	Ercc5	protein_coding	-1.08553	5.33719	6.2418	0	1.35521	0.634464	0.525778
ENSMUSG00000040738	Ints8	protein_coding	-2.84952	5.33719	6.46795	0	1.29208	0.584522	0.558869
ENSMUSG00000028890	Mtf1	protein_coding	-2.39721	5.33719	6.28703	0	1.14434	0.468087	0.639723
ENSMUSG00000031917	Nip7	protein_coding	-1.4926	5.33719	6.51318	0	1.09039	0.425457	0.670503
ENSMUSG00000009112	Bcl2l13	protein_coding	-2.39721	5.33719	6.28703	0	1.08125	0.419348	0.674962
ENSMUSG00000018651	Tada2a	protein_coding	-1.76399	5.33719	6.2418	0	1.06431	0.409378	0.682263
ENSMUSG00000097392	D930016D06Rik	lincRNA	-1.0403	5.33719	6.1061	0	1.04429	0.396629	0.691641
ENSMUSG00000042729	Wdr74	protein_coding	-1.62829	5.33719	6.1061	0	0.793003	0.224633	0.822265
ENSMUSG00000071604	Fam189a2	protein_coding	2.66859	5.29196	6.60364	2.66859	5.03026	4.32005	1.55996e-05
ENSMUSG00000027669	Gnb4	protein_coding	3.30182	5.29196	6.37749	3.30182	4.75432	4.04562	5.21854e-05
ENSMUSG00000022864	D16Ertd472e	protein_coding	2.75905	5.29196	6.37749	2.75905	4.732	4.02255	5.75716e-05
ENSMUSG00000002900	Lamb1	protein_coding	3.07567	5.29196	6.42272	3.07567	4.21036	3.47536	0.000510162
ENSMUSG00000033538	Casp4	protein_coding	2.21629	5.29196	6.46795	2.21629	3.66189	2.9011	0.00371854
ENSMUSG00000058388	Phtf1	protein_coding	2.21629	5.29196	6.55841	2.21629	3.5763	2.8113	0.00493411
ENSMUSG00000029335	Bmp3	protein_coding	0.452304	5.29196	6.37749	0.452304	3.38006	2.6098	0.0090595
ENSMUSG00000039178	Tbc1d19	protein_coding	2.17106	5.29196	6.46795	2.17106	3.00851	2.22465	0.0261045
ENSMUSG00000022978	Mis18a	protein_coding	1.85445	5.29196	6.46795	1.85445	2.83983	2.05152	0.0402165
ENSMUSG00000036916	Zfp280c	protein_coding	1.4926	5.29196	6.42272	1.4926	2.71886	1.92542	0.0541768
ENSMUSG00000020778	Ten1	protein_coding	0.904608	5.29196	6.60364	0.904608	2.43602	1.63718	0.101593
ENSMUSG00000056501	Cebpb	protein_coding	0.271382	5.29196	6.51318	0.271382	2.25451	1.4548	0.145724
ENSMUSG00000024943	Smc5	protein_coding	0.226152	5.29196	6.33226	0.226152	2.05911	1.26747	0.204988
ENSMUSG00000087174	5530601H04Rik	processed_transcript	0	5.29196	6.33226	0	1.98196	1.1981	0.230877
ENSMUSG00000005069	Pex5	protein_coding	-0.0452304	5.29196	6.2418	0	1.93147	1.1502	0.250061
ENSMUSG00000018372	Cep95	protein_coding	-0.0904608	5.29196	6.46795	0	1.908	1.12598	0.260174
ENSMUSG00000105161	Gm42595	lincRNA	-0.316613	5.29196	6.33226	0	1.86126	1.08435	0.278209
ENSMUSG00000042121	Ssh1	protein_coding	-0.180922	5.29196	6.2418	0	1.84301	1.06684	0.286044
ENSMUSG00000039737	Prkrip1	protein_coding	-0.316613	5.29196	6.33226	0	1.8008	1.03101	0.302536
ENSMUSG00000040010	Slc7a5	protein_coding	-0.768917	5.29196	6.33226	0	1.5311	0.785274	0.432293
ENSMUSG00000021193	Pitrm1	protein_coding	-1.31168	5.29196	6.33226	0	1.44987	0.720413	0.471271
ENSMUSG00000001157	Gmcl1	protein_coding	-1.85445	5.29196	6.15133	0	1.2939	0.585557	0.558173
ENSMUSG00000030126	Tmcc1	protein_coding	-1.22122	5.29196	6.42272	0	1.26301	0.559442	0.57586
ENSMUSG00000028999	Rint1	protein_coding	-1.08553	5.29196	6.33226	0	1.25388	0.55163	0.581202
ENSMUSG00000102212	C230085N15Rik	TEC	2.98521	5.24673	6.42272	2.98521	5.11651	4.40543	1.05577e-05
ENSMUSG00000057176	Ccdc189	protein_coding	3.03044	5.24673	6.64887	3.03044	3.72793	2.97201	0.00295852
ENSMUSG00000037411	Serpine1	protein_coding	1.53783	5.24673	6.37749	1.53783	3.19778	2.42177	0.0154451
ENSMUSG00000020893	Per1	protein_coding	1.85445	5.24673	6.51318	1.85445	2.89958	2.11251	0.034643
ENSMUSG00000109363	Gm44668	TEC	3.34705	5.24673	6.2418	3.34705	2.68031	1.88802	0.0590226
ENSMUSG00000105461	Gm4742	processed_pseudogene	1.62829	5.24673	6.37749	1.62829	2.59699	1.80194	0.0715553
ENSMUSG00000107143	Gm42469	antisense	0.271382	5.24673	6.28703	0.271382	2.52358	1.72861	0.0838795
ENSMUSG00000020448	Rnf185	protein_coding	1.26645	5.24673	6.42272	1.26645	2.49519	1.69876	0.0893653
ENSMUSG00000000278	Scpep1	protein_coding	0.407074	5.24673	6.51318	0.407074	2.27655	1.4753	0.140133
ENSMUSG00000033909	Usp36	protein_coding	0.135691	5.24673	6.33226	0.135691	2.07693	1.28583	0.198503
ENSMUSG00000014550	Rbsn	protein_coding	-0.0452304	5.24673	6.37749	0	1.94699	1.16434	0.244287
ENSMUSG00000004356	Utp20	protein_coding	-0.0904608	5.24673	6.15133	0	1.90816	1.12598	0.260174
ENSMUSG00000040524	Zfp609	protein_coding	-0.904608	5.24673	6.19656	0	1.7546	0.987246	0.323522
ENSMUSG00000020978	Klhdc2	protein_coding	-0.497534	5.24673	6.73933	0	1.71889	0.953382	0.340396
ENSMUSG00000051185	Fam174a	protein_coding	-0.995069	5.24673	6.2418	0	1.6373	0.877162	0.380399
ENSMUSG00000028744	Pqlc2	protein_coding	-1.26645	5.24673	6.19656	0	1.62756	0.87036	0.384104
ENSMUSG00000038607	Gng10	protein_coding	-0.497534	5.24673	6.33226	0	1.62016	0.864301	0.387423
ENSMUSG00000032397	Tipin	protein_coding	-0.949838	5.24673	6.42272	0	1.53232	0.786658	0.431482
ENSMUSG00000028479	Gne	protein_coding	-0.678456	5.24673	6.15133	0	1.52591	0.782229	0.43408
ENSMUSG00000031134	Rbmx	protein_coding	-0.768917	5.24673	6.28703	0	1.37908	0.653885	0.513186
ENSMUSG00000030347	D6Wsu163e	protein_coding	-2.35198	5.24673	6.01564	0	1.21217	0.520241	0.602895
ENSMUSG00000027668	Mfn1	protein_coding	-1.35691	5.24673	6.1061	0	1.20298	0.513753	0.607425
ENSMUSG00000106432	Gm43259	sense_intronic	-2.44244	5.24673	6.2418	0	0.786369	0.221272	0.824881
ENSMUSG00000015747	Vps45	protein_coding	-4.79442	5.24673	6.15133	0	0.58618	0.110033	0.912383
ENSMUSG00000020651	Slc26a4	protein_coding	2.89475	5.2015	6.37749	2.89475	4.78733	4.07719	4.55823e-05
ENSMUSG00000033965	Slc16a2	protein_coding	2.71382	5.2015	6.51318	2.71382	3.24399	2.46957	0.0135275
ENSMUSG00000045975	C2cd2	protein_coding	2.03537	5.2015	6.33226	2.03537	3.17042	2.3947	0.0166341
ENSMUSG00000028848	Gpn2	protein_coding	1.35691	5.2015	6.2418	1.35691	3.0986	2.32056	0.0203107
ENSMUSG00000038034	Igsf8	protein_coding	1.76399	5.2015	6.42272	1.76399	2.94262	2.15605	0.0310799
ENSMUSG00000089704	Galnt2	protein_coding	1.85445	5.2015	6.37749	1.85445	2.74465	1.95144	0.0510049
ENSMUSG00000041879	Ipo9	protein_coding	1.08553	5.2015	6.60364	1.08553	2.40231	1.59967	0.109673
ENSMUSG00000033444	Specc1l	protein_coding	0.904608	5.2015	6.33226	0.904608	2.35738	1.55583	0.119748
ENSMUSG00000078894	2210418O10Rik	protein_coding	0.723686	5.2015	6.37749	0.723686	2.34561	1.54363	0.122678
ENSMUSG00000069208	Zfp825	protein_coding	0.723686	5.2015	6.1061	0.723686	2.27015	1.46887	0.141869
ENSMUSG00000031758	Cdyl2	protein_coding	0.0452304	5.2015	6.19656	0.0452304	2.12251	1.3296	0.18365
ENSMUSG00000033365	Ipo13	protein_coding	0.361843	5.2015	6.33226	0.361843	2.11777	1.32537	0.18505
ENSMUSG00000021009	Ptpn21	protein_coding	0.135691	5.2015	6.28703	0.135691	2.02261	1.23489	0.216873
ENSMUSG00000041974	Spidr	protein_coding	0.0452304	5.2015	6.28703	0.0452304	1.98757	1.20233	0.229237
ENSMUSG00000103591	Gm38365	TEC	0	5.2015	6.2418	0	1.97036	1.18717	0.23516
ENSMUSG00000104940	Gm42908	TEC	-0.180922	5.2015	6.33226	0	1.8894	1.11045	0.266806
ENSMUSG00000020549	Elac2	protein_coding	-1.17599	5.2015	6.1061	0	1.42734	0.698534	0.484843
ENSMUSG00000033767	D930015E06Rik	protein_coding	-0.904608	5.2015	6.28703	0	1.24156	0.543242	0.586963
ENSMUSG00000063952	Brpf3	protein_coding	-1.40214	5.2015	6.06087	0	1.2197	0.526156	0.59878
ENSMUSG00000030720	Cln3	protein_coding	-1.58306	5.2015	6.15133	0	1.17779	0.494126	0.621217
ENSMUSG00000074527	Gm14296	protein_coding	-1.35691	5.2015	6.1061	0	1.16984	0.48825	0.625373
ENSMUSG00000001829	Clpb	protein_coding	-2.66859	5.2015	6.28703	0	1.09008	0.425181	0.670705
ENSMUSG00000039000	Ube3c	protein_coding	-1.80922	5.2015	6.28703	0	0.741561	0.193459	0.8466
ENSMUSG00000029344	Tpst2	protein_coding	3.03044	5.15627	6.42272	3.03044	3.75188	2.99644	0.0027315
ENSMUSG00000034795	Ccdc122	protein_coding	2.30675	5.15627	6.28703	2.30675	3.24088	2.4663	0.0136517
ENSMUSG00000042628	Zfyve1	protein_coding	1.0403	5.15627	6.2418	1.0403	2.93658	2.14925	0.0316144
ENSMUSG00000023966	Rsph9	protein_coding	0.271382	5.15627	6.15133	0.271382	2.55435	1.75833	0.0786921
ENSMUSG00000101337	Dnah7c	protein_coding	0.316613	5.15627	6.19656	0.316613	2.46501	1.66532	0.0958484
ENSMUSG00000017561	Crlf3	protein_coding	0.904608	5.15627	6.2418	0.904608	2.40902	1.60719	0.108012
ENSMUSG00000027253	Lrp4	protein_coding	0.904608	5.15627	6.28703	0.904608	2.3171	1.51462	0.12987
ENSMUSG00000018809	Smyd4	protein_coding	0.497534	5.15627	6.2418	0.497534	2.15321	1.35797	0.174473
ENSMUSG00000001054	Rmnd5b	protein_coding	0.316613	5.15627	6.46795	0.316613	2.09193	1.30043	0.193452
ENSMUSG00000026203	Dnajb2	protein_coding	0.0904608	5.15627	6.28703	0.0904608	2.02896	1.24102	0.214599
ENSMUSG00000022297	Fzd6	protein_coding	-0.0452304	5.15627	6.42272	0	1.9462	1.16344	0.24465
ENSMUSG00000031145	Prickle3	protein_coding	-0.180922	5.15627	6.1061	0	1.89554	1.11526	0.264739
ENSMUSG00000028243	Ubxn2b	protein_coding	-0.180922	5.15627	6.01564	0	1.7953	1.02642	0.304693
ENSMUSG00000026585	Kifap3	protein_coding	-0.271382	5.15627	6.42272	0	1.78865	1.02048	0.307499
ENSMUSG00000025139	Tollip	protein_coding	-1.35691	5.15627	6.37749	0	1.57666	0.828298	0.407502
ENSMUSG00000058351	Smim4	protein_coding	-0.768917	5.15627	6.1061	0	1.57295	0.825303	0.409199
ENSMUSG00000035933	Cog5	protein_coding	-0.723686	5.15627	6.37749	0	1.53907	0.792954	0.427805
ENSMUSG00000044674	Fzd1	protein_coding	-1.40214	5.15627	6.01564	0	1.22815	0.531859	0.594824
ENSMUSG00000004896	Rrnad1	protein_coding	-2.48767	5.15627	6.1061	0	1.07554	0.415298	0.677924
ENSMUSG00000020366	Mapk9	protein_coding	-1.53783	5.15627	6.15133	0	0.961054	0.337329	0.735869
ENSMUSG00000103672	Gm37621	TEC	-3.75412	5.15627	5.92518	0	0.83929	0.251399	0.801506
ENSMUSG00000021745	Ptprg	protein_coding	2.66859	5.11104	6.51318	2.66859	4.48307	3.75774	0.000171454
ENSMUSG00000081752	Gm14680	processed_pseudogene	0.633226	5.11104	6.19656	0.633226	3.1952	2.41977	0.0155305
ENSMUSG00000025790	Slco3a1	protein_coding	2.93998	5.11104	6.28703	2.93998	3.17192	2.39628	0.0165623
ENSMUSG00000026797	Stxbp1	protein_coding	2.0806	5.11104	6.2418	2.0806	2.71845	1.92542	0.0541768
ENSMUSG00000035268	Pkig	protein_coding	1.44737	5.11104	6.2418	1.44737	2.56253	1.76577	0.077434
ENSMUSG00000000409	Lck	protein_coding	1.31168	5.11104	6.1061	1.31168	2.46008	1.66154	0.0966052
ENSMUSG00000023044	Csad	protein_coding	0.135691	5.11104	6.19656	0.135691	2.34336	1.54157	0.123178
ENSMUSG00000022479	Vdr	protein_coding	0.633226	5.11104	6.33226	0.633226	2.25355	1.45422	0.145886
ENSMUSG00000053291	Rab4b	protein_coding	0.316613	5.11104	6.15133	0.316613	2.18291	1.38566	0.165852
ENSMUSG00000029234	Tmem165	protein_coding	0.271382	5.11104	6.28703	0.271382	2.10289	1.3112	0.189792
ENSMUSG00000029416	Slc15a4	protein_coding	0	5.11104	6.15133	0	1.96218	1.17838	0.238647
ENSMUSG00000003308	Keap1	protein_coding	-0.995069	5.11104	6.2418	0	1.66326	0.901167	0.3675
ENSMUSG00000020273	Papolg	protein_coding	-2.17106	5.11104	6.15133	0	1.60688	0.853921	0.393149
ENSMUSG00000030056	Isy1	protein_coding	-0.497534	5.11104	6.1061	0	1.58433	0.835496	0.403438
ENSMUSG00000007837	Prrg2	protein_coding	-0.678456	5.11104	6.15133	0	1.56145	0.813584	0.415883
ENSMUSG00000019984	Med23	protein_coding	-1.22122	5.11104	6.01564	0	1.49958	0.763516	0.445156
ENSMUSG00000035666	Gtf3c4	protein_coding	-1.13076	5.11104	6.2418	0	1.35908	0.638236	0.52332
ENSMUSG00000024527	Afg3l2	protein_coding	-3.1209	5.11104	6.1061	0	1.10129	0.433684	0.664518
ENSMUSG00000029173	Sepsecs	protein_coding	-2.66859	5.11104	6.15133	0	1.09771	0.430372	0.666925
ENSMUSG00000002981	Clptm1	protein_coding	-1.40214	5.11104	6.06087	0	1.0176	0.37795	0.705468
ENSMUSG00000043323	Fbrsl1	protein_coding	-2.44244	5.11104	6.2418	0	0.890885	0.288989	0.772589
ENSMUSG00000031527	Eri1	protein_coding	-3.03044	5.11104	6.1061	0	0.715082	0.178518	0.858317
ENSMUSG00000070691	Runx3	protein_coding	3.30182	5.0658	6.2418	3.30182	5.23576	4.51871	6.22162e-06
ENSMUSG00000011034	Slc5a1	protein_coding	2.71382	5.0658	6.28703	2.71382	5.04928	4.33868	1.4334e-05
ENSMUSG00000030745	Il21r	protein_coding	2.57813	5.0658	6.28703	2.57813	5.03219	4.32172	1.54816e-05
ENSMUSG00000024302	Dtna	protein_coding	2.44244	5.0658	6.51318	2.44244	4.87238	4.16286	3.1428e-05
ENSMUSG00000045382	Cxcr4	protein_coding	0.995069	5.0658	6.33226	0.995069	4.22103	3.48597	0.000490357
ENSMUSG00000039062	Anpep	protein_coding	0.768917	5.0658	6.19656	0.768917	4.11385	3.37634	0.000734572
ENSMUSG00000032010	Usp2	protein_coding	0.723686	5.0658	6.19656	0.723686	4.01743	3.27134	0.0010704
ENSMUSG00000078878	Gm14305	protein_coding	2.0806	5.0658	6.33226	2.0806	3.18373	2.4084	0.0160225
ENSMUSG00000020806	Rhbdf2	protein_coding	1.44737	5.0658	6.6941	1.44737	3.07041	2.28987	0.0220291
ENSMUSG00000027395	Polr1b	protein_coding	1.31168	5.0658	6.2418	1.31168	2.46302	1.66395	0.0961222
ENSMUSG00000044345	Marveld1	protein_coding	0.633226	5.0658	6.28703	0.633226	2.36795	1.56652	0.117227
ENSMUSG00000066640	Fbxl18	protein_coding	0.361843	5.0658	6.2418	0.361843	2.20293	1.40461	0.160138
ENSMUSG00000042632	Pla2g6	protein_coding	0.0904608	5.0658	6.06087	0.0904608	2.1368	1.34368	0.179051
ENSMUSG00000036036	Zfp57	protein_coding	0.180922	5.0658	6.42272	0.180922	2.07249	1.28263	0.19962
ENSMUSG00000073147	5031425E22Rik	lincRNA	-0.180922	5.0658	6.19656	0	1.88733	1.1087	0.26756
ENSMUSG00000039652	Cpeb3	protein_coding	-0.316613	5.0658	6.2418	0	1.80052	1.03101	0.302536
ENSMUSG00000043391	2510009E07Rik	protein_coding	-0.768917	5.0658	6.2418	0	1.59357	0.842433	0.399546
ENSMUSG00000005078	Jkamp	protein_coding	-1.0403	5.0658	6.33226	0	1.50812	0.768998	0.441894
ENSMUSG00000022701	Ccdc191	protein_coding	-0.949838	5.0658	6.1061	0	1.42133	0.693442	0.488032
ENSMUSG00000040455	Usp45	protein_coding	-1.4926	5.0658	6.42272	0	1.38504	0.660168	0.509146
ENSMUSG00000043929	Klhl15	protein_coding	-1.26645	5.0658	6.1061	0	1.22836	0.531859	0.594824
ENSMUSG00000020986	Sec23a	protein_coding	-2.44244	5.0658	6.1061	0	1.07828	0.417776	0.676111
ENSMUSG00000014763	Fam120b	protein_coding	-1.76399	5.0658	6.1061	0	1.05049	0.399933	0.689206
ENSMUSG00000052212	Cd177	protein_coding	3.1209	5.02057	6.28703	3.1209	5.15287	4.44167	8.92617e-06
ENSMUSG00000074472	Zfp872	protein_coding	1.22122	5.02057	6.19656	1.22122	4.37696	3.64664	0.000265694
ENSMUSG00000029338	Antxr2	protein_coding	3.16613	5.02057	6.64887	3.16613	3.84011	3.08501	0.00203544
ENSMUSG00000070306	Ccdc153	protein_coding	0.723686	5.02057	5.97041	0.723686	3.65572	2.89462	0.00379619
ENSMUSG00000033900	Map9	protein_coding	2.21629	5.02057	6.1061	2.21629	3.58679	2.8221	0.004771
ENSMUSG00000026288	Inpp5d	protein_coding	1.4926	5.02057	6.15133	1.4926	3.52455	2.75523	0.00586502
ENSMUSG00000033029	1700088E04Rik	protein_coding	3.03044	5.02057	6.2418	3.03044	3.5003	2.72833	0.00636553
ENSMUSG00000042359	Osbpl6	protein_coding	0.497534	5.02057	6.15133	0.497534	2.7444	1.95139	0.0510112
ENSMUSG00000054083	Capn12	protein_coding	1.26645	5.02057	6.51318	1.26645	2.70583	1.91217	0.0558538
ENSMUSG00000026836	Acvr1	protein_coding	1.26645	5.02057	6.2418	1.26645	2.51169	1.71704	0.085972
ENSMUSG00000031504	Rab20	protein_coding	0.361843	5.02057	6.2418	0.361843	2.49585	1.69938	0.0892481
ENSMUSG00000037049	Smpd1	protein_coding	0.587995	5.02057	6.2418	0.587995	2.25493	1.4549	0.145697
ENSMUSG00000020069	Hnrnph3	protein_coding	0.497534	5.02057	6.2418	0.497534	2.22616	1.43001	0.152714
ENSMUSG00000018040	Rrp7a	protein_coding	0.0452304	5.02057	6.19656	0.0452304	1.99145	1.20604	0.227801
ENSMUSG00000036845	Lin37	protein_coding	-0.361843	5.02057	6.15133	0	1.81677	1.04395	0.296508
ENSMUSG00000017721	Pigt	protein_coding	-0.361843	5.02057	6.19656	0	1.78832	1.02048	0.307499
ENSMUSG00000035632	Cnot3	protein_coding	-0.407074	5.02057	6.19656	0	1.71398	0.949855	0.342186
ENSMUSG00000043909	Trp53bp1	protein_coding	-0.723686	5.02057	6.2418	0	1.5893	0.839509	0.401184
ENSMUSG00000033669	Zfp7	protein_coding	-1.26645	5.02057	6.1061	0	1.56425	0.816659	0.414123
ENSMUSG00000046562	Unc119b	protein_coding	-0.633226	5.02057	6.06087	0	1.54381	0.797713	0.425037
ENSMUSG00000020895	Tmem107	protein_coding	-1.22122	5.02057	5.97041	0	1.47058	0.736086	0.461679
ENSMUSG00000021357	Exoc2	protein_coding	-1.0403	5.02057	6.1061	0	1.45387	0.722636	0.469903
ENSMUSG00000057177	Gsk3a	protein_coding	-1.26645	5.02057	6.1061	0	1.40618	0.679001	0.497137
ENSMUSG00000039382	Wdr45	protein_coding	-1.17599	5.02057	6.1061	0	1.39497	0.670751	0.502379
ENSMUSG00000057894	Zfp329	protein_coding	-1.31168	5.02057	6.15133	0	1.21843	0.524821	0.599708
ENSMUSG00000039176	Polg	protein_coding	-1.71876	5.02057	6.37749	0	1.11592	0.444701	0.656536
ENSMUSG00000048410	Zfp407	protein_coding	-2.03537	5.02057	6.2418	0	1.10366	0.435665	0.66308
ENSMUSG00000020792	Exoc7	protein_coding	-3.21136	5.02057	5.97041	0	0.773077	0.212516	0.831705
ENSMUSG00000044197	Gpr146	protein_coding	2.84952	4.97534	6.19656	2.84952	4.84082	4.13084	3.61444e-05
ENSMUSG00000054046	Klk13	protein_coding	1.89968	4.97534	6.15133	1.89968	3.67344	2.91414	0.00356666
ENSMUSG00000020681	Ace	protein_coding	1.4926	4.97534	6.15133	1.4926	3.59281	2.8288	0.0046723
ENSMUSG00000024737	Slc15a3	protein_coding	1.99014	4.97534	6.19656	1.99014	3.18149	2.4065	0.0161061
ENSMUSG00000057531	Dtnbp1	protein_coding	2.44244	4.97534	6.2418	2.44244	3.09324	2.31467	0.0206312
ENSMUSG00000068551	Zfp467	protein_coding	2.21629	4.97534	6.28703	2.21629	2.99097	2.20753	0.0272771
ENSMUSG00000026980	Ly75	protein_coding	1.71876	4.97534	6.28703	1.71876	2.87417	2.08629	0.0369523
ENSMUSG00000032875	Arhgef17	protein_coding	1.67352	4.97534	6.28703	1.67352	2.8268	2.03774	0.0415762
ENSMUSG00000033902	Mapkbp1	protein_coding	0.904608	4.97534	6.28703	0.904608	2.54687	1.74968	0.0801738
ENSMUSG00000000759	Tubgcp3	protein_coding	1.08553	4.97534	6.19656	1.08553	2.5146	1.72027	0.0853829
ENSMUSG00000029771	Irf5	protein_coding	1.08553	4.97534	6.33226	1.08553	2.47968	1.68215	0.0925405
ENSMUSG00000028459	Cd72	protein_coding	0.859378	4.97534	6.33226	0.859378	2.38184	1.57835	0.114486
ENSMUSG00000024560	Cxxc1	protein_coding	0.904608	4.97534	6.28703	0.904608	2.26833	1.46711	0.142345
ENSMUSG00000038949	Cnst	protein_coding	0.271382	4.97534	6.19656	0.271382	2.10392	1.31175	0.189606
ENSMUSG00000009772	Nuak2	protein_coding	0.180922	4.97534	6.1061	0.180922	2.05913	1.26747	0.204988
ENSMUSG00000105304	Gm43696	sense_intronic	0.0452304	4.97534	5.97041	0.0452304	1.9872	1.20233	0.229237
ENSMUSG00000038352	Arl5c	protein_coding	0	4.97534	6.1061	0	1.96764	1.18426	0.236312
ENSMUSG00000017670	Elmo2	protein_coding	-0.0904608	4.97534	6.51318	0	1.93948	1.15664	0.24742
ENSMUSG00000033720	Sfxn5	protein_coding	-0.407074	4.97534	6.15133	0	1.80835	1.0374	0.29955
ENSMUSG00000090264	Eif4ebp3	protein_coding	-0.542765	4.97534	6.01564	0	1.75909	0.991634	0.321376
ENSMUSG00000031605	Klhl2	protein_coding	-2.17106	4.97534	5.97041	0	1.31475	0.601323	0.547625
ENSMUSG00000048661	Lemd3	protein_coding	-1.53783	4.97534	6.15133	0	1.24708	0.547237	0.584216
ENSMUSG00000044502	Bod1	protein_coding	-2.12583	4.97534	5.83472	0	1.06005	0.407186	0.683872
ENSMUSG00000036918	Ttc7	protein_coding	-1.94491	4.97534	6.2418	0	1.02981	0.385451	0.699904
ENSMUSG00000026000	Lancl1	protein_coding	-1.85445	4.97534	6.19656	0	0.977251	0.348548	0.727428
ENSMUSG00000003848	Nob1	protein_coding	-2.71382	4.97534	6.15133	0	0.674196	0.155046	0.876785
ENSMUSG00000026692	Fmo4	protein_coding	1.44737	4.93011	6.01564	1.44737	4.55806	3.83564	0.000125236
ENSMUSG00000032826	Ank2	protein_coding	1.89968	4.93011	6.15133	1.89968	4.51168	3.7868	0.000152598
ENSMUSG00000102374	Gm38387	TEC	1.53783	4.93011	6.19656	1.53783	4.25648	3.52176	0.000428696
ENSMUSG00000020642	Rnf144a	protein_coding	1.94491	4.93011	6.37749	1.94491	4.04345	3.30015	0.000966322
ENSMUSG00000004951	Hspb1	protein_coding	2.30675	4.93011	6.37749	2.30675	4.04029	3.29677	0.000978035
ENSMUSG00000018500	Adora2b	protein_coding	0.814147	4.93011	6.15133	0.814147	3.8121	3.05669	0.00223799
ENSMUSG00000024986	Hhex	protein_coding	0.904608	4.93011	5.97041	0.904608	3.73413	2.97775	0.00290372
ENSMUSG00000004698	Hdac9	protein_coding	1.80922	4.93011	6.33226	1.80922	3.57702	2.81183	0.00492603
ENSMUSG00000035969	Rusc2	protein_coding	2.35198	4.93011	6.1061	2.35198	3.43243	2.66216	0.00776405
ENSMUSG00000054932	Afp	protein_coding	1.76399	4.93011	6.19656	1.76399	2.88336	2.09643	0.0360438
ENSMUSG00000037300	Ttc13	protein_coding	1.53783	4.93011	6.19656	1.53783	2.60029	1.80463	0.071133
ENSMUSG00000107041	Gm42735	TEC	0.995069	4.93011	6.2418	0.995069	2.46991	1.67035	0.0948504
ENSMUSG00000054843	Atrnl1	protein_coding	1.62829	4.93011	6.15133	1.62829	2.45803	1.65957	0.0970018
ENSMUSG00000025036	Sfxn2	protein_coding	0.135691	4.93011	6.19656	0.135691	2.03205	1.24342	0.213713
ENSMUSG00000049624	Slc17a5	protein_coding	-0.316613	4.93011	5.97041	0	1.83052	1.05639	0.290789
ENSMUSG00000058542	Gm15590	processed_pseudogene	-0.407074	4.93011	5.97041	0	1.74148	0.974055	0.330029
ENSMUSG00000036977	Anapc10	protein_coding	-0.904608	4.93011	6.2418	0	1.65454	0.892486	0.372132
ENSMUSG00000053483	Usp21	protein_coding	-0.814147	4.93011	6.15133	0	1.61372	0.858855	0.390421
ENSMUSG00000040265	Dnm3	protein_coding	-1.35691	4.93011	6.1061	0	1.18618	0.500537	0.616697
ENSMUSG00000033400	Agl	protein_coding	-1.99014	4.93011	5.92518	0	1.13328	0.460389	0.645237
ENSMUSG00000003033	Ap1m1	protein_coding	-1.4926	4.93011	6.15133	0	1.04776	0.397454	0.691033
ENSMUSG00000041762	Gpr155	protein_coding	2.75905	4.88488	6.15133	2.75905	5.02953	4.31974	1.56211e-05
ENSMUSG00000024349	Tmem173	protein_coding	2.62336	4.88488	6.33226	2.62336	4.99371	4.28541	1.82399e-05
ENSMUSG00000071714	Csf2rb2	protein_coding	3.03044	4.88488	6.28703	3.03044	4.78362	4.07338	4.63356e-05
ENSMUSG00000020919	Stat5b	protein_coding	2.75905	4.88488	6.2418	2.75905	4.1332	3.39659	0.0006823
ENSMUSG00000022262	Dnah5	protein_coding	0.542765	4.88488	6.01564	0.542765	3.85147	3.09611	0.00196076
ENSMUSG00000032332	Col12a1	protein_coding	0.316613	4.88488	5.92518	0.316613	3.45501	2.68391	0.0072766
ENSMUSG00000051236	Msrb3	protein_coding	1.53783	4.88488	6.28703	1.53783	3.39079	2.61887	0.00882208
ENSMUSG00000026737	Pip4k2a	protein_coding	0.949838	4.88488	6.06087	0.949838	3.06425	2.28263	0.0224523
ENSMUSG00000041775	Mapk1ip1	protein_coding	1.35691	4.88488	6.06087	1.35691	2.5409	1.74385	0.0811856
ENSMUSG00000032380	Dapk2	protein_coding	1.76399	4.88488	6.15133	1.76399	2.53904	1.74268	0.0813899
ENSMUSG00000022591	Gm9747	protein_coding	2.0806	4.88488	6.19656	2.0806	2.41924	1.61766	0.105736
ENSMUSG00000027498	Cstf1	protein_coding	0.497534	4.88488	6.15133	0.497534	2.25027	1.45144	0.146657
ENSMUSG00000025354	Dnajc14	protein_coding	-0.271382	4.88488	6.1061	0	1.83129	1.05668	0.290656
ENSMUSG00000039145	Camk1d	protein_coding	-0.542765	4.88488	6.01564	0	1.69544	0.933118	0.350759
ENSMUSG00000037526	Atg14	protein_coding	-0.542765	4.88488	6.19656	0	1.63599	0.875879	0.381096
ENSMUSG00000058093	Zfp729b	protein_coding	-0.814147	4.88488	6.1061	0	1.61976	0.864172	0.387493
ENSMUSG00000024269	Tpgs2	protein_coding	-1.67352	4.88488	5.92518	0	1.31997	0.606051	0.544481
ENSMUSG00000005150	Wdr83	protein_coding	-2.80428	4.88488	5.97041	0	1.30205	0.59069	0.554728
ENSMUSG00000070834	Gm13015	processed_pseudogene	-1.62829	4.88488	5.92518	0	1.24691	0.547237	0.584216
ENSMUSG00000021224	Numb	protein_coding	-1.4926	4.88488	6.15133	0	1.18977	0.50322	0.61481
ENSMUSG00000038299	Wdr36	protein_coding	-1.53783	4.88488	6.01564	0	1.08604	0.423008	0.67229
ENSMUSG00000014554	Dguok	protein_coding	-1.80922	4.88488	5.97041	0	0.91505	0.304665	0.760621
ENSMUSG00000106715	Tmem265	protein_coding	-3.07567	4.88488	5.69903	0	0.74585	0.194715	0.845616
ENSMUSG00000064246	Chil1	protein_coding	3.93504	4.83965	10.8101	3.93504	7.16081	6.40843	1.47028e-10
ENSMUSG00000053205	Styx	protein_coding	0.814147	4.83965	5.97041	0.814147	4.16167	3.42525	0.00061423
ENSMUSG00000024939	Fam89b	protein_coding	2.0806	4.83965	6.15133	2.0806	3.50928	2.7384	0.00617389
ENSMUSG00000025537	Phkg1	protein_coding	2.44244	4.83965	6.15133	2.44244	3.04394	2.26095	0.0237622
ENSMUSG00000020100	Slc29a3	protein_coding	0.316613	4.83965	5.92518	0.316613	2.69815	1.90484	0.0568004
ENSMUSG00000021428	Riok1	protein_coding	1.13076	4.83965	6.1061	1.13076	2.59233	1.79736	0.0722788
ENSMUSG00000022760	Thap7	protein_coding	0.949838	4.83965	6.01564	0.949838	2.4188	1.61731	0.105812
ENSMUSG00000028889	Yrdc	protein_coding	0.995069	4.83965	6.1061	0.995069	2.32854	1.52588	0.12704
ENSMUSG00000003420	Fcgrt	protein_coding	0.542765	4.83965	6.19656	0.542765	2.25204	1.4524	0.14639
ENSMUSG00000063623	C230062I16Rik	processed_transcript	0.180922	4.83965	6.06087	0.180922	2.21899	1.42329	0.154652
ENSMUSG00000032194	Kank2	protein_coding	0.497534	4.83965	6.15133	0.497534	2.17787	1.38181	0.167029
ENSMUSG00000016933	Plcg1	protein_coding	0.0904608	4.83965	6.06087	0.0904608	2.04259	1.25336	0.210076
ENSMUSG00000067071	Hes6	protein_coding	0	4.83965	6.1061	0	1.97276	1.18966	0.234181
ENSMUSG00000004508	Gab2	protein_coding	-0.180922	4.83965	6.1061	0	1.89563	1.11526	0.264739
ENSMUSG00000047423	AI837181	protein_coding	-0.271382	4.83965	6.01564	0	1.84668	1.0703	0.284485
ENSMUSG00000018428	Akap1	protein_coding	-0.271382	4.83965	6.2418	0	1.84261	1.06661	0.286146
ENSMUSG00000020070	Rufy2	protein_coding	-0.361843	4.83965	6.19656	0	1.78879	1.02048	0.307499
ENSMUSG00000021650	Ptcd2	protein_coding	-0.407074	4.83965	5.97041	0	1.672	0.911122	0.362231
ENSMUSG00000020072	Pbld2	protein_coding	-1.08553	4.83965	6.01564	0	1.63495	0.874991	0.381579
ENSMUSG00000018001	Cyth3	protein_coding	-0.814147	4.83965	6.01564	0	1.62602	0.869151	0.384764
ENSMUSG00000040472	Rabggta	protein_coding	-1.4926	4.83965	5.92518	0	1.53883	0.792954	0.427805
ENSMUSG00000021810	Ecd	protein_coding	-0.814147	4.83965	5.97041	0	1.52496	0.781301	0.434625
ENSMUSG00000084817	Gm5526	processed_pseudogene	-0.678456	4.83965	5.97041	0	1.51874	0.777908	0.436623
ENSMUSG00000002731	Prkra	protein_coding	-1.67352	4.83965	6.1061	0	1.51539	0.775448	0.438075
ENSMUSG00000033502	Cdc14a	protein_coding	-2.84952	4.83965	5.87995	0	1.25673	0.553614	0.579843
ENSMUSG00000018401	Mtmr4	protein_coding	-1.40214	4.83965	6.01564	0	1.25145	0.549679	0.58254
ENSMUSG00000037366	Pafah2	protein_coding	-2.0806	4.83965	6.1061	0	0.997567	0.363143	0.716498
ENSMUSG00000033701	Acbd6	protein_coding	-2.17106	4.83965	5.97041	0	0.765976	0.208668	0.834708
ENSMUSG00000089951	Gm14435	protein_coding	-3.30182	4.83965	5.6538	0	0.575754	0.105248	0.916179
ENSMUSG00000080859	Rpl10-ps1	transcribed_processed_pseudogene	2.84952	4.79442	6.2418	2.84952	5.07523	4.36523	1.26987e-05
ENSMUSG00000006586	Runx1t1	protein_coding	1.53783	4.79442	5.97041	1.53783	4.38307	3.65339	0.000258797
ENSMUSG00000040528	Milr1	protein_coding	1.89968	4.79442	6.37749	1.89968	4.0504	3.30808	0.000939365
ENSMUSG00000028789	Azin2	protein_coding	1.26645	4.79442	6.19656	1.26645	3.23785	2.46446	0.0137218
ENSMUSG00000011267	Zfp296	protein_coding	0.407074	4.79442	6.06087	0.407074	3.23608	2.4631	0.0137742
ENSMUSG00000064280	Ccdc146	protein_coding	0.723686	4.79442	6.1061	0.723686	2.83731	2.04966	0.0403972
ENSMUSG00000021068	Nin	protein_coding	1.4926	4.79442	6.01564	1.4926	2.8292	2.04056	0.0412945
ENSMUSG00000042750	Bex2	protein_coding	0.678456	4.79442	5.97041	0.678456	2.75327	1.95937	0.0500697
ENSMUSG00000069920	B3gnt9	protein_coding	2.12583	4.79442	5.97041	2.12583	2.75305	1.95936	0.0500709
ENSMUSG00000045257	Morn2	protein_coding	1.53783	4.79442	6.19656	1.53783	2.7172	1.92406	0.0543474
ENSMUSG00000058881	Zfp516	protein_coding	0.361843	4.79442	6.01564	0.361843	2.66919	1.87684	0.0605396
ENSMUSG00000074361	C5ar2	protein_coding	0.361843	4.79442	6.01564	0.361843	2.61801	1.82255	0.068372
ENSMUSG00000025223	Ldb1	protein_coding	1.35691	4.79442	6.19656	1.35691	2.58716	1.79211	0.073116
ENSMUSG00000046352	Gjb2	protein_coding	1.22122	4.79442	6.1061	1.22122	2.57939	1.78338	0.0745238
ENSMUSG00000026480	Ncf2	protein_coding	0.180922	4.79442	5.78949	0.180922	2.27982	1.4779	0.139434
ENSMUSG00000033933	Vhl	protein_coding	0.587995	4.79442	6.01564	0.587995	2.25689	1.45709	0.145092
ENSMUSG00000059851	Suv420h2	protein_coding	0.226152	4.79442	6.01564	0.226152	2.18743	1.39045	0.164393
ENSMUSG00000097048	1600020E01Rik	antisense	0.271382	4.79442	6.28703	0.271382	2.11637	1.32436	0.185384
ENSMUSG00000028619	Tceanc2	protein_coding	-0.0904608	4.79442	5.97041	0	1.92445	1.14384	0.25269
ENSMUSG00000019975	Ikbip	protein_coding	-0.226152	4.79442	6.1061	0	1.82873	1.0547	0.291563
ENSMUSG00000023973	Cnpy3	protein_coding	-0.587995	4.79442	6.15133	0	1.73391	0.967849	0.33312
ENSMUSG00000004266	Ptpn6	protein_coding	-0.995069	4.79442	5.92518	0	1.64956	0.887555	0.37478
ENSMUSG00000038206	Fbxo8	protein_coding	-0.633226	4.79442	5.87995	0	1.61758	0.861841	0.388775
ENSMUSG00000034509	Mad2l1bp	protein_coding	-1.17599	4.79442	5.87995	0	1.32154	0.607608	0.543447
ENSMUSG00000049504	Proser1	protein_coding	-2.03537	4.79442	5.83472	0	1.19819	0.509818	0.610179
ENSMUSG00000035824	Tk2	protein_coding	-2.48767	4.79442	6.1061	0	1.13133	0.458695	0.646453
ENSMUSG00000106443	Gm42702	sense_intronic	-2.26152	4.79442	6.01564	0	1.07613	0.415647	0.677668
ENSMUSG00000036552	Ermard	protein_coding	-1.67352	4.79442	6.15133	0	0.933768	0.321047	0.748175
ENSMUSG00000056167	Cnot10	protein_coding	-1.71876	4.79442	6.01564	0	0.87589	0.279127	0.780148
ENSMUSG00000032127	Vps11	protein_coding	-2.39721	4.79442	5.78949	0	0.683791	0.15931	0.873424
ENSMUSG00000022020	Naa16	protein_coding	0.361843	4.74919	6.19656	0.361843	3.21019	2.43491	0.0148954
ENSMUSG00000016503	Gtf3a	protein_coding	1.40214	4.74919	6.06087	1.40214	2.6303	1.83637	0.0663037
ENSMUSG00000034429	Zfp707	protein_coding	0.904608	4.74919	5.87995	0.904608	2.45938	1.66112	0.0966892
ENSMUSG00000096472	Cdkn2d	protein_coding	0.497534	4.74919	5.92518	0.497534	2.44743	1.64867	0.0992146
ENSMUSG00000093565	Rab26os	antisense	0.407074	4.74919	6.19656	0.407074	2.32598	1.52334	0.127673
ENSMUSG00000027508	Pag1	protein_coding	0.723686	4.74919	5.97041	0.723686	2.31002	1.50868	0.131381
ENSMUSG00000068917	Clk2	protein_coding	0.407074	4.74919	6.19656	0.407074	2.29974	1.49841	0.134026
ENSMUSG00000014039	Prdm15	protein_coding	0.0452304	4.74919	5.97041	0.0452304	2.05839	1.26692	0.205184
ENSMUSG00000049643	2310022A10Rik	protein_coding	-0.180922	4.74919	6.01564	0	1.88583	1.10787	0.267917
ENSMUSG00000043284	Tmem11	protein_coding	-0.226152	4.74919	6.33226	0	1.8483	1.07157	0.283913
ENSMUSG00000058594	Fbxo18	protein_coding	-0.497534	4.74919	6.06087	0	1.78872	1.02048	0.307499
ENSMUSG00000036270	Edc4	protein_coding	-0.678456	4.74919	6.01564	0	1.68664	0.923766	0.355608
ENSMUSG00000026790	Odf2	protein_coding	-0.814147	4.74919	6.33226	0	1.62891	0.871101	0.383699
ENSMUSG00000032198	Dock6	protein_coding	-0.587995	4.74919	6.06087	0	1.60995	0.856956	0.391469
ENSMUSG00000002210	Smg9	protein_coding	-0.904608	4.74919	5.92518	0	1.58424	0.835496	0.403438
ENSMUSG00000039990	Edrf1	protein_coding	-1.22122	4.74919	5.83472	0	1.45489	0.723039	0.469656
ENSMUSG00000026679	Enkur	protein_coding	-1.40214	4.74919	5.78949	0	1.36916	0.645165	0.518821
ENSMUSG00000057672	Pkn1	protein_coding	-1.26645	4.74919	6.01564	0	1.3137	0.600434	0.548217
ENSMUSG00000036501	Fam13b	protein_coding	-1.67352	4.74919	6.01564	0	1.1791	0.494648	0.620848
ENSMUSG00000060090	Rp2	protein_coding	-1.31168	4.74919	5.78949	0	1.17115	0.488835	0.624958
ENSMUSG00000043872	Zmym1	protein_coding	-1.40214	4.74919	6.01564	0	1.02788	0.383632	0.701252
ENSMUSG00000025470	Zfp511	protein_coding	-1.89968	4.74919	6.01564	0	1.00169	0.366327	0.714121
ENSMUSG00000004631	Sgce	protein_coding	2.48767	4.70396	5.97041	2.48767	3.7923	3.036	0.00239737
ENSMUSG00000027947	Il6ra	protein_coding	0.995069	4.70396	6.06087	0.995069	3.65362	2.8924	0.00382313
ENSMUSG00000024906	Mus81	protein_coding	1.85445	4.70396	6.15133	1.85445	2.57161	1.77412	0.0760432
ENSMUSG00000011382	Dhdh	protein_coding	0.180922	4.70396	5.92518	0.180922	2.06879	1.27864	0.201024
ENSMUSG00000051232	Tmem199	protein_coding	0.180922	4.70396	6.01564	0.180922	2.02303	1.23513	0.216781
ENSMUSG00000022159	Rab2b	protein_coding	-0.497534	4.70396	5.87995	0	1.77236	1.00486	0.314965
ENSMUSG00000044340	Phlpp1	protein_coding	-0.497534	4.70396	5.97041	0	1.72978	0.96422	0.334936
ENSMUSG00000033326	Kdm4a	protein_coding	-0.768917	4.70396	6.15133	0	1.68292	0.92087	0.357119
ENSMUSG00000030465	Psd3	protein_coding	-1.0403	4.70396	5.83472	0	1.52526	0.781473	0.434524
ENSMUSG00000014075	Tctex1d2	protein_coding	-1.40214	4.70396	6.01564	0	1.1467	0.469276	0.638872
ENSMUSG00000037638	Zbtb42	protein_coding	-1.40214	4.70396	5.74426	0	1.09759	0.43036	0.666934
ENSMUSG00000024561	Mbd1	protein_coding	-3.43751	4.70396	5.74426	0	0.700598	0.169057	0.865751
ENSMUSG00000022197	Pdzd2	protein_coding	-3.07567	4.70396	5.6538	0	0.656338	0.146543	0.883493
ENSMUSG00000001750	Tcirg1	protein_coding	-2.57813	4.70396	5.92518	0	0.653839	0.145696	0.884162
ENSMUSG00000012117	Dhdds	protein_coding	-2.80428	4.70396	5.74426	0	0.427951	0.0378093	0.96984
ENSMUSG00000097415	AU020206	lincRNA	1.31168	4.65873	5.92518	1.31168	4.43542	3.70801	0.000208897
ENSMUSG00000026311	Asb1	protein_coding	1.08553	4.65873	5.87995	1.08553	3.94624	3.19401	0.00140313
ENSMUSG00000057614	Gnai1	protein_coding	2.57813	4.65873	5.97041	2.57813	3.71017	2.95325	0.00314442
ENSMUSG00000038058	Nod1	protein_coding	1.26645	4.65873	5.97041	1.26645	3.58089	2.81554	0.00486953
ENSMUSG00000016520	Lnx2	protein_coding	2.30675	4.65873	5.97041	2.30675	3.47466	2.70279	0.00687596
ENSMUSG00000099342	Gm18180	processed_pseudogene	0.316613	4.65873	5.87995	0.316613	3.44099	2.67056	0.00757254
ENSMUSG00000068270	Shroom4	protein_coding	0.452304	4.65873	5.69903	0.452304	3.30667	2.53478	0.0112517
ENSMUSG00000032507	Fbxl2	protein_coding	0.995069	4.65873	5.97041	0.995069	3.193	2.41854	0.0155829
ENSMUSG00000003031	Cdkn1b	protein_coding	1.0403	4.65873	6.6941	1.0403	3.15809	2.38311	0.0171669
ENSMUSG00000107092	Gm7993	processed_pseudogene	2.39721	4.65873	5.97041	2.39721	2.78272	1.99081	0.0465017
ENSMUSG00000018678	Sp2	protein_coding	0.995069	4.65873	6.1061	0.995069	2.47013	1.67039	0.094842
ENSMUSG00000026018	Ica1l	protein_coding	0.226152	4.65873	5.74426	0.226152	2.35669	1.55515	0.119911
ENSMUSG00000036873	2410004B18Rik	protein_coding	0.452304	4.65873	5.87995	0.452304	2.15034	1.35472	0.175507
ENSMUSG00000039474	Wfs1	protein_coding	0.0904608	4.65873	5.78949	0.0904608	2.05714	1.26688	0.205199
ENSMUSG00000028108	Ecm1	protein_coding	0.0452304	4.65873	5.83472	0.0452304	2.02141	1.23422	0.217122
ENSMUSG00000068264	Ap5s1	protein_coding	0.0452304	4.65873	5.74426	0.0452304	1.9759	1.19227	0.233154
ENSMUSG00000020232	Hmg20b	protein_coding	-0.316613	4.65873	5.87995	0	1.81858	1.04539	0.295841
ENSMUSG00000063236	1110038F14Rik	protein_coding	-0.316613	4.65873	6.01564	0	1.79441	1.02536	0.305192
ENSMUSG00000074794	Arrdc3	protein_coding	-0.587995	4.65873	6.06087	0	1.70849	0.945875	0.344212
ENSMUSG00000029752	Asns	protein_coding	-2.71382	4.65873	5.97041	0	0.921038	0.309478	0.756958
ENSMUSG00000090093	Gm14399	protein_coding	-3.66366	4.65873	5.78949	0	0.694378	0.16481	0.869094
ENSMUSG00000029474	Rnf34	protein_coding	-3.25659	4.65873	5.74426	0	0.663009	0.149696	0.881004
ENSMUSG00000076138	Gm26377	miRNA	2.5329	4.6135	7.28209	2.5329	5.72474	4.99887	5.76659e-07
ENSMUSG00000055717	Slain1	protein_coding	2.26152	4.6135	5.97041	2.26152	4.90271	4.19185	2.7669e-05
ENSMUSG00000078451	Ppil6	protein_coding	2.89475	4.6135	5.87995	2.89475	4.49508	3.76959	0.000163513
ENSMUSG00000106093	Gm42722	antisense	1.0403	4.6135	5.92518	1.0403	4.25927	3.52464	0.000424052
ENSMUSG00000020901	Pik3r5	protein_coding	1.94491	4.6135	5.78949	1.94491	3.44674	2.67635	0.00744299
ENSMUSG00000039804	Ncoa5	protein_coding	2.12583	4.6135	5.92518	2.12583	3.43275	2.66216	0.00776405
ENSMUSG00000029093	Sorcs2	protein_coding	0.678456	4.6135	5.87995	0.678456	3.28279	2.5116	0.0120186
ENSMUSG00000030930	Chst15	protein_coding	0.361843	4.6135	5.78949	0.361843	3.18347	2.40838	0.0160236
ENSMUSG00000044471	Lncpint	lincRNA	1.67352	4.6135	5.97041	1.67352	2.69692	1.90424	0.0568793
ENSMUSG00000037060	Prkcdbp	protein_coding	0.0452304	4.6135	5.83472	0.0452304	2.11202	1.32065	0.186617
ENSMUSG00000039103	Nexn	protein_coding	0.0904608	4.6135	5.78949	0.0904608	1.99196	1.20652	0.227616
ENSMUSG00000099081	Gm27624	misc_RNA	0	4.6135	6.06087	0	1.97885	1.19508	0.232056
ENSMUSG00000078887	Gm6710	protein_coding	-0.226152	4.6135	6.01564	0	1.86552	1.08876	0.276258
ENSMUSG00000032263	Bckdhb	protein_coding	-0.407074	4.6135	5.83472	0	1.85469	1.07762	0.281202
ENSMUSG00000029387	Gtf2h3	protein_coding	-0.768917	4.6135	5.92518	0	1.69395	0.931795	0.351442
ENSMUSG00000027079	Clp1	protein_coding	-0.723686	4.6135	5.83472	0	1.6027	0.850201	0.395214
ENSMUSG00000041135	Ripk2	protein_coding	-1.44737	4.6135	5.87995	0	1.58784	0.838536	0.40173
ENSMUSG00000020801	Med31	protein_coding	-0.723686	4.6135	5.78949	0	1.56224	0.814328	0.415457
ENSMUSG00000022772	Senp5	protein_coding	-1.53783	4.6135	5.78949	0	1.44218	0.71325	0.475691
ENSMUSG00000044792	Isca1	protein_coding	-1.4926	4.6135	5.87995	0	1.18454	0.499502	0.617426
ENSMUSG00000019254	Ppp1r12c	protein_coding	-2.17106	4.6135	6.1061	0	1.10489	0.436264	0.662645
ENSMUSG00000090608	Gm17200	processed_transcript	-1.53783	4.6135	5.69903	0	0.961432	0.337552	0.735701
ENSMUSG00000021619	Atg10	protein_coding	1.99014	4.56827	5.87995	1.99014	4.81812	4.10849	3.9825e-05
ENSMUSG00000097772	5430416N02Rik	lincRNA	1.99014	4.56827	6.1061	1.99014	3.02416	2.23929	0.0251369
ENSMUSG00000052102	Gnpda1	protein_coding	1.99014	4.56827	6.15133	1.99014	3.00323	2.21938	0.026461
ENSMUSG00000028701	Lurap1	protein_coding	1.26645	4.56827	5.87995	1.26645	2.79271	2.00159	0.0453289
ENSMUSG00000033106	Slc7a6os	protein_coding	1.62829	4.56827	5.97041	1.62829	2.74841	1.95579	0.0504893
ENSMUSG00000037174	Elf2	protein_coding	0.633226	4.56827	6.15133	0.633226	2.52996	1.7345	0.0828294
ENSMUSG00000038600	Atp6v0a4	protein_coding	1.22122	4.56827	5.78949	1.22122	2.40641	1.60469	0.108561
ENSMUSG00000024354	Slc23a1	protein_coding	0.135691	4.56827	5.83472	0.135691	2.31833	1.5158	0.129571
ENSMUSG00000094942	Gm3604	protein_coding	0.904608	4.56827	5.92518	0.904608	2.25517	1.45498	0.145675
ENSMUSG00000039089	L3mbtl3	protein_coding	0.407074	4.56827	6.1061	0.407074	2.19431	1.39668	0.162509
ENSMUSG00000005102	Eif2ak4	protein_coding	0.271382	4.56827	6.28703	0.271382	2.08441	1.29345	0.195855
ENSMUSG00000029534	St7	protein_coding	0	4.56827	6.06087	0	1.96013	1.17703	0.239182
ENSMUSG00000058454	Dhcr7	protein_coding	-0.226152	4.56827	5.74426	0	1.86569	1.08876	0.276258
ENSMUSG00000028689	Ccdc163	protein_coding	-0.497534	4.56827	5.69903	0	1.70675	0.94401	0.345165
ENSMUSG00000078897	Gm4724	protein_coding	-1.22122	4.56827	5.78949	0	1.51937	0.777973	0.436585
ENSMUSG00000056228	Cars2	protein_coding	-1.44737	4.56827	5.87995	0	1.40451	0.678307	0.497577
ENSMUSG00000078881	Gm14434	protein_coding	-1.31168	4.56827	5.74426	0	1.27578	0.56896	0.569383
ENSMUSG00000037890	Wdr19	protein_coding	-1.31168	4.56827	6.1061	0	1.23002	0.532874	0.594121
ENSMUSG00000048911	Rnf24	protein_coding	-2.57813	4.56827	5.6538	0	1.20958	0.518752	0.603933
ENSMUSG00000037570	Mcrs1	protein_coding	-2.93998	4.56827	5.74426	0	1.1766	0.49309	0.621949
ENSMUSG00000041859	Mcm3	protein_coding	-3.30182	4.56827	5.78949	0	1.14143	0.466419	0.640915
ENSMUSG00000055334	Snupn	protein_coding	-2.21629	4.56827	5.69903	0	0.994243	0.360578	0.718415
ENSMUSG00000022556	Hsf1	protein_coding	-2.80428	4.56827	5.60857	0	0.981652	0.351441	0.725258
ENSMUSG00000058793	Cds2	protein_coding	-2.03537	4.56827	5.92518	0	0.820765	0.240736	0.80976
ENSMUSG00000028643	Svbp	protein_coding	-2.35198	4.56827	5.83472	0	0.529781	0.0817864	0.934817
ENSMUSG00000038740	Mvb12b	protein_coding	0.587995	4.52304	6.2418	0.587995	4.00875	3.26368	0.00109976
ENSMUSG00000037679	Inf2	protein_coding	0.452304	4.52304	6.1061	0.452304	3.74423	2.98896	0.00279929
ENSMUSG00000032855	Pkd1	protein_coding	2.17106	4.52304	6.01564	2.17106	3.62497	2.86263	0.00420134
ENSMUSG00000038143	Stox2	protein_coding	2.30675	4.52304	5.92518	2.30675	3.23567	2.46289	0.013782
ENSMUSG00000048924	Ccdc125	protein_coding	0.904608	4.52304	5.83472	0.904608	3.07997	2.30021	0.0214364
ENSMUSG00000048373	Fgfbp1	protein_coding	1.76399	4.52304	5.92518	1.76399	3.01614	2.23262	0.025574
ENSMUSG00000045251	Zfp688	protein_coding	0.271382	4.52304	5.78949	0.271382	2.89199	2.10559	0.0352399
ENSMUSG00000032997	Chpf	protein_coding	1.71876	4.52304	6.1061	1.71876	2.78974	1.99828	0.0456862
ENSMUSG00000023947	Nfkbie	protein_coding	0.949838	4.52304	5.87995	0.949838	2.77197	1.97876	0.0478431
ENSMUSG00000105107	Gm43412	TEC	0.723686	4.52304	6.01564	0.723686	2.3145	1.51215	0.130496
ENSMUSG00000021692	Dimt1	protein_coding	0.633226	4.52304	5.83472	0.633226	2.25721	1.45728	0.145038
ENSMUSG00000036764	Dnajc12	protein_coding	0.542765	4.52304	6.19656	0.542765	2.20178	1.4035	0.160467
ENSMUSG00000042348	Arl15	protein_coding	0.361843	4.52304	5.87995	0.361843	2.11038	1.31953	0.186992
ENSMUSG00000020715	Ern1	protein_coding	-0.904608	4.52304	5.92518	0	1.53291	0.786666	0.431477
ENSMUSG00000025145	Lrrc45	protein_coding	-0.859378	4.52304	6.15133	0	1.50235	0.76581	0.443789
ENSMUSG00000098088	Gm26916	lincRNA	-1.31168	4.52304	6.01564	0	1.33206	0.615652	0.538124
ENSMUSG00000024887	Asah2	protein_coding	-1.89968	4.52304	6.1061	0	1.17781	0.494126	0.621217
ENSMUSG00000083287	Gm13502	processed_pseudogene	-1.71876	4.52304	5.83472	0	1.12889	0.456327	0.648155
ENSMUSG00000047767	Atg16l2	protein_coding	-2.17106	4.52304	5.92518	0	1.01566	0.376445	0.706586
ENSMUSG00000027185	Nat10	protein_coding	-3.16613	4.52304	5.69903	0	0.508699	0.0723831	0.942297
ENSMUSG00000040687	Madd	protein_coding	-3.75412	4.52304	5.56334	0	0.0586948	0	1
ENSMUSG00000034361	Cpne2	protein_coding	1.76399	4.47781	6.1061	1.76399	4.22353	3.48769	0.00048721
ENSMUSG00000023008	Fmnl3	protein_coding	0.859378	4.47781	6.1061	0.859378	3.46385	2.6918	0.00710685
ENSMUSG00000091476	Gm16432	protein_coding	1.26645	4.47781	5.87995	1.26645	3.38715	2.61566	0.00890541
ENSMUSG00000029718	Pcolce	protein_coding	1.44737	4.47781	5.74426	1.44737	2.4566	1.65842	0.0972333
ENSMUSG00000082820	Gm13803	processed_pseudogene	0.949838	4.47781	6.15133	0.949838	2.36206	1.56042	0.118661
ENSMUSG00000025196	Cpn1	protein_coding	0.497534	4.47781	6.37749	0.497534	2.31437	1.51215	0.130496
ENSMUSG00000059669	Taf1b	protein_coding	0.0452304	4.47781	5.69903	0.0452304	2.15807	1.36232	0.173095
ENSMUSG00000029516	Cit	protein_coding	0.180922	4.47781	5.69903	0.180922	2.05046	1.26114	0.20726
ENSMUSG00000064349	mt-Tc	Mt_tRNA	0	4.47781	5.83472	0	2.00797	1.22153	0.221887
ENSMUSG00000026240	Cops7b	protein_coding	-0.0452304	4.47781	5.87995	0	1.93332	1.1515	0.249526
ENSMUSG00000022412	Mief1	protein_coding	-0.995069	4.47781	5.74426	0	1.62083	0.864468	0.387331
ENSMUSG00000078670	Fam174b	protein_coding	-1.4926	4.47781	6.06087	0	1.42838	0.699386	0.484311
ENSMUSG00000037808	Fam76b	protein_coding	-1.4926	4.47781	5.83472	0	1.30363	0.591628	0.5541
ENSMUSG00000099021	Rn7s1	misc_RNA	-1.71876	4.47781	5.56334	0	1.24681	0.547237	0.584216
ENSMUSG00000099250	Rn7s2	misc_RNA	-1.71876	4.47781	5.56334	0	1.24681	0.547237	0.584216
ENSMUSG00000026960	Arl6ip6	protein_coding	-2.03537	4.47781	5.69903	0	1.13804	0.464381	0.642375
ENSMUSG00000095990	Zfp97	protein_coding	-3.1209	4.47781	5.78949	0	1.11003	0.439511	0.660292
ENSMUSG00000026601	Axdnd1	protein_coding	2.44244	4.43258	5.74426	2.44244	3.81353	3.05767	0.00223068
ENSMUSG00000096403	Gm9825	processed_pseudogene	1.58306	4.43258	5.78949	1.58306	3.75257	2.99659	0.0027302
ENSMUSG00000028763	Hspg2	protein_coding	1.67352	4.43258	5.74426	1.67352	3.40677	2.63442	0.00842806
ENSMUSG00000025324	Atp10a	protein_coding	0.678456	4.43258	5.83472	0.678456	3.12865	2.35381	0.0185823
ENSMUSG00000025010	Ccnj	protein_coding	0.271382	4.43258	5.92518	0.271382	2.68122	1.88887	0.058909
ENSMUSG00000010057	Nprl2	protein_coding	0.180922	4.43258	5.69903	0.180922	2.33517	1.5327	0.125349
ENSMUSG00000030055	Rab43	protein_coding	0.723686	4.43258	5.6538	0.723686	2.32589	1.52334	0.127673
ENSMUSG00000028669	Pithd1	protein_coding	0.180922	4.43258	5.74426	0.180922	2.27754	1.47626	0.139873
ENSMUSG00000005667	Mthfd2	protein_coding	0	4.43258	5.83472	0	1.97547	1.19213	0.233209
ENSMUSG00000031737	Irx5	protein_coding	0	4.43258	5.97041	0	1.97016	1.18711	0.235183
ENSMUSG00000021684	Pde8b	protein_coding	-0.0452304	4.43258	5.92518	0	1.93715	1.15385	0.248562
ENSMUSG00000089665	Fcor	protein_coding	-0.497534	4.43258	5.60857	0	1.79696	1.02836	0.303779
ENSMUSG00000030881	Arfip2	protein_coding	-3.03044	4.43258	5.56334	0	1.14384	0.468087	0.639723
ENSMUSG00000046826	Fam187b	protein_coding	-1.80922	4.43258	5.6538	0	1.03574	0.390781	0.695959
ENSMUSG00000106149	Gm43430	TEC	-2.75905	4.43258	5.6538	0	0.796413	0.22698	0.82044
ENSMUSG00000035595	1600002K03Rik	protein_coding	2.48767	4.38735	5.97041	2.48767	4.22206	3.48677	0.000488899
ENSMUSG00000024990	Rbp4	protein_coding	0.904608	4.38735	5.83472	0.904608	4.09721	3.35967	0.000780353
ENSMUSG00000090625	Gm20721	protein_coding	2.03537	4.38735	6.2418	2.03537	2.90369	2.11665	0.0342894
ENSMUSG00000071748	Gm14698	protein_coding	0.452304	4.38735	5.83472	0.452304	2.73975	1.94643	0.0516034
ENSMUSG00000059326	Csf2ra	protein_coding	1.08553	4.38735	5.97041	1.08553	2.63807	1.84474	0.0650747
ENSMUSG00000046096	BC030336	protein_coding	1.58306	4.38735	6.06087	1.58306	2.36378	1.56224	0.118232
ENSMUSG00000053687	Dpep2	protein_coding	0.135691	4.38735	5.74426	0.135691	2.2322	1.43443	0.151449
ENSMUSG00000089902	Gm13625	processed_transcript	0.542765	4.38735	5.83472	0.542765	2.1649	1.36797	0.171323
ENSMUSG00000085975	Gm13572	lincRNA	0.0452304	4.38735	5.74426	0.0452304	2.1276	1.33593	0.181572
ENSMUSG00000054469	Lclat1	protein_coding	0.226152	4.38735	5.69903	0.226152	2.05451	1.26449	0.206056
ENSMUSG00000096201	Gm10715	protein_coding	-0.452304	4.38735	5.83472	0	1.70893	0.946095	0.3441
ENSMUSG00000000134	Tfe3	protein_coding	-0.949838	4.38735	5.87995	0	1.48964	0.753309	0.451264
ENSMUSG00000040521	Tsfm	protein_coding	-1.40214	4.38735	5.47288	0	1.47513	0.740819	0.458803
ENSMUSG00000040189	Ccdc114	protein_coding	-1.31168	4.38735	5.60857	0	1.41802	0.689749	0.490352
ENSMUSG00000072946	Ptgr2	protein_coding	-2.12583	4.38735	5.69903	0	1.13208	0.459456	0.645907
ENSMUSG00000075327	Zbtb2	protein_coding	-2.89475	4.38735	5.47288	0	1.07975	0.418355	0.675687
ENSMUSG00000047617	BC029214	protein_coding	-2.0806	4.38735	5.6538	0	0.755723	0.202027	0.839896
ENSMUSG00000037851	Iars	protein_coding	-2.84952	4.38735	5.56334	0	0.718173	0.180328	0.856895
ENSMUSG00000001674	Ddx18	protein_coding	-2.35198	4.38735	5.51811	0	0.496913	0.0669214	0.946644
ENSMUSG00000058818	Pirb	protein_coding	1.40214	4.34212	5.74426	1.40214	4.16264	3.42601	0.000612519
ENSMUSG00000020904	Cfap52	protein_coding	0.316613	4.34212	5.69903	0.316613	3.49288	2.72087	0.00651095
ENSMUSG00000000290	Itgb2	protein_coding	0.271382	4.34212	5.6538	0.271382	3.32664	2.55524	0.0106115
ENSMUSG00000032609	Klhdc8b	protein_coding	0.859378	4.34212	5.78949	0.859378	2.95309	2.16717	0.0302219
ENSMUSG00000048895	Cdk5r1	protein_coding	1.08553	4.34212	5.78949	1.08553	2.72367	1.92978	0.0536339
ENSMUSG00000050373	Snx21	protein_coding	2.12583	4.34212	5.87995	2.12583	2.69282	1.90085	0.0573222
ENSMUSG00000038000	Acd	protein_coding	1.31168	4.34212	5.83472	1.31168	2.62777	1.8333	0.0667584
ENSMUSG00000028617	Lrrc42	protein_coding	0.633226	4.34212	5.78949	0.633226	2.23958	1.44165	0.149401
ENSMUSG00000052825	Gm9892	processed_pseudogene	0.0452304	4.34212	6.1061	0.0452304	1.99539	1.21043	0.226113
ENSMUSG00000061898	Rbak	protein_coding	-0.0452304	4.34212	5.6538	0	1.95004	1.1673	0.24309
ENSMUSG00000026662	Sephs1	protein_coding	-0.316613	4.34212	5.83472	0	1.82096	1.04771	0.294772
ENSMUSG00000086240	Gm7846	processed_pseudogene	-0.452304	4.34212	6.06087	0	1.76983	1.00252	0.316094
ENSMUSG00000051451	Crebzf	protein_coding	-0.226152	4.34212	5.6538	0	1.7683	1.00116	0.316751
ENSMUSG00000002797	Ggct	protein_coding	-0.678456	4.34212	5.60857	0	1.76441	0.997494	0.318525
ENSMUSG00000061330	Gm11361	processed_pseudogene	-0.542765	4.34212	5.74426	0	1.66699	0.904916	0.36551
ENSMUSG00000029730	Mcm7	protein_coding	-1.26645	4.34212	5.60857	0	1.56852	0.821056	0.411614
ENSMUSG00000030815	Phkg2	protein_coding	-1.0403	4.34212	6.01564	0	1.5185	0.777908	0.436623
ENSMUSG00000022064	Pibf1	protein_coding	-1.13076	4.34212	5.78949	0	1.50688	0.76794	0.442523
ENSMUSG00000030301	Ccdc91	protein_coding	-1.40214	4.34212	5.74426	0	1.2159	0.523429	0.600676
ENSMUSG00000002608	Ccdc97	protein_coding	-2.03537	4.34212	5.56334	0	1.04938	0.398982	0.689907
ENSMUSG00000031967	Afg3l1	protein_coding	-2.93998	4.34212	5.78949	0	1.01228	0.373822	0.708537
ENSMUSG00000039813	Tbc1d2	protein_coding	-2.12583	4.34212	5.69903	0	0.811949	0.236088	0.813364
ENSMUSG00000002625	Akap8l	protein_coding	-1.85445	4.34212	5.69903	0	0.803103	0.230407	0.817775
ENSMUSG00000032812	Arap1	protein_coding	-2.0806	4.34212	5.60857	0	0.79033	0.224266	0.82255
ENSMUSG00000017754	Pltp	protein_coding	2.48767	4.29689	5.78949	2.48767	4.93062	4.21945	2.44895e-05
ENSMUSG00000046110	Serinc4	protein_coding	1.89968	4.29689	5.87995	1.89968	2.83156	2.04334	0.0410191
ENSMUSG00000069631	Strada	protein_coding	1.62829	4.29689	5.60857	1.62829	2.79089	1.99949	0.0455551
ENSMUSG00000031974	Abcb10	protein_coding	1.0403	4.29689	5.97041	1.0403	2.55984	1.76299	0.0779023
ENSMUSG00000031842	Pde4c	protein_coding	0.0904608	4.29689	5.74426	0.0904608	2.10327	1.31131	0.189752
ENSMUSG00000028708	Mknk1	protein_coding	-0.0904608	4.29689	5.78949	0	1.86468	1.08811	0.276546
ENSMUSG00000028344	Invs	protein_coding	-0.0904608	4.29689	5.42765	0	1.8511	1.07469	0.282514
ENSMUSG00000024312	Wdr46	protein_coding	-0.361843	4.29689	5.78949	0	1.82185	1.04834	0.294484
ENSMUSG00000078765	U2af1l4	protein_coding	-0.271382	4.29689	5.74426	0	1.80961	1.03793	0.299301
ENSMUSG00000104548	Gm43857	TEC	-0.407074	4.29689	5.87995	0	1.78235	1.01407	0.310549
ENSMUSG00000038759	Nup205	protein_coding	-1.40214	4.29689	5.60857	0	1.5474	0.800514	0.423413
ENSMUSG00000022094	Slc39a14	protein_coding	-1.71876	4.29689	5.51811	0	1.32608	0.612047	0.540507
ENSMUSG00000026604	Ptpn14	protein_coding	-2.03537	4.29689	5.74426	0	1.06664	0.411085	0.68101
ENSMUSG00000039826	Trub2	protein_coding	-1.62829	4.29689	5.6538	0	1.04394	0.396629	0.691641
ENSMUSG00000031286	Glt28d2	protein_coding	-2.17106	4.29689	5.33719	0	0.948154	0.328407	0.742604
ENSMUSG00000079478	Sssca1	protein_coding	-2.26152	4.29689	5.56334	0	0.540348	0.0851923	0.932108
ENSMUSG00000029406	Pitpnm2	protein_coding	2.21629	4.25166	6.55841	2.21629	4.88362	4.17299	3.00627e-05
ENSMUSG00000040808	S100g	protein_coding	2.48767	4.25166	8.95562	2.48767	4.71523	4.00495	6.20315e-05
ENSMUSG00000102817	Gm6185	unprocessed_pseudogene	1.17599	4.25166	5.87995	1.17599	4.49121	3.76594	0.000165921
ENSMUSG00000054675	Tmem119	protein_coding	0.587995	4.25166	5.69903	0.587995	3.86054	3.10557	0.00189916
ENSMUSG00000005672	Kit	protein_coding	0.226152	4.25166	5.56334	0.226152	2.28911	1.48805	0.136737
ENSMUSG00000047205	Dusp18	protein_coding	0.316613	4.25166	5.78949	0.316613	2.2285	1.43092	0.152453
ENSMUSG00000022863	Btg3	protein_coding	0.407074	4.25166	6.1061	0.407074	2.17871	1.38249	0.16682
ENSMUSG00000093752	Gm20716	protein_coding	-1.08553	4.25166	5.6538	0	1.59111	0.841263	0.400201
ENSMUSG00000021809	Nudt13	protein_coding	-0.949838	4.25166	5.6538	0	1.55074	0.803178	0.421872
ENSMUSG00000010492	Uckl1os	antisense	-0.859378	4.25166	5.56334	0	1.52162	0.778545	0.436248
ENSMUSG00000028948	Nol9	protein_coding	-1.08553	4.25166	5.78949	0	1.44354	0.714281	0.475053
ENSMUSG00000011257	Pabpc4	protein_coding	-1.85445	4.25166	6.15133	0	1.37131	0.647002	0.517631
ENSMUSG00000042594	Sh2b3	protein_coding	-1.4926	4.25166	5.83472	0	1.29769	0.587281	0.557015
ENSMUSG00000029715	Pop7	protein_coding	-2.39721	4.25166	5.56334	0	1.00833	0.370452	0.711046
ENSMUSG00000030162	Olr1	protein_coding	2.17106	4.20643	5.60857	2.17106	4.85684	4.14689	3.37028e-05
ENSMUSG00000020473	Aebp1	protein_coding	1.76399	4.20643	5.69903	1.76399	4.59436	3.87619	0.000106107
ENSMUSG00000024063	Lbh	protein_coding	0.904608	4.20643	5.60857	0.904608	2.95624	2.17028	0.0299854
ENSMUSG00000052395	Rft1	protein_coding	0.361843	4.20643	5.42765	0.361843	2.26728	1.46617	0.142603
ENSMUSG00000070871	Ccnyl1	protein_coding	0.995069	4.20643	5.6538	0.995069	2.23463	1.43663	0.150822
ENSMUSG00000030188	Magohb	protein_coding	-0.180922	4.20643	5.78949	0	1.89007	1.11062	0.266732
ENSMUSG00000025742	Prps2	protein_coding	-0.0904608	4.20643	6.1061	0	1.88619	1.10816	0.267794
ENSMUSG00000022292	Rrm2b	protein_coding	-1.67352	4.20643	5.87995	0	1.47598	0.741483	0.458401
ENSMUSG00000021276	Cinp	protein_coding	-1.44737	4.20643	5.56334	0	1.37143	0.647002	0.517631
ENSMUSG00000029179	Zcchc4	protein_coding	-3.30182	4.20643	5.60857	0	1.09589	0.428812	0.66806
ENSMUSG00000020831	0610010K14Rik	protein_coding	-1.89968	4.20643	5.83472	0	1.03447	0.389592	0.696839
ENSMUSG00000039480	Nt5dc1	protein_coding	-2.39721	4.20643	5.92518	0	0.918509	0.307505	0.758459
ENSMUSG00000053333	Dis3l2	protein_coding	-2.75905	4.20643	5.47288	0	0.893377	0.290965	0.771078
ENSMUSG00000089706	B230216N24Rik	processed_transcript	-2.17106	4.20643	5.42765	0	0.631936	0.132231	0.894802
ENSMUSG00000026822	Lcn2	protein_coding	3.16613	4.1612	10.0411	3.16613	7.1608	6.40843	1.47028e-10
ENSMUSG00000020513	Tubd1	protein_coding	2.12583	4.1612	5.6538	2.12583	4.82144	4.11185	3.92496e-05
ENSMUSG00000024810	Il33	protein_coding	2.17106	4.1612	7.59871	2.17106	4.33865	3.60792	0.000308657
ENSMUSG00000085663	Gm15718	antisense	1.17599	4.1612	5.51811	1.17599	4.19164	3.45642	0.000547406
ENSMUSG00000055835	Zfp1	protein_coding	2.12583	4.1612	5.74426	2.12583	4.08447	3.34644	0.000818561
ENSMUSG00000033032	Afap1l1	protein_coding	0.452304	4.1612	6.01564	0.452304	3.77641	3.02174	0.00251329
ENSMUSG00000030545	Pex11a	protein_coding	1.62829	4.1612	5.87995	1.62829	2.50314	1.70809	0.0876203
ENSMUSG00000088651	Gm24853	snoRNA	-0.587995	4.1612	5.60857	0	1.69664	0.934131	0.350236
ENSMUSG00000029598	Plbd2	protein_coding	-1.35691	4.1612	5.78949	0	1.27757	0.571231	0.567843
ENSMUSG00000038507	Parp12	protein_coding	-2.39721	4.1612	5.56334	0	0.873449	0.277031	0.781757
ENSMUSG00000021811	Dnajc9	protein_coding	-2.62336	4.1612	5.56334	0	0.564229	0.09997	0.920368
ENSMUSG00000052031	Tagap1	protein_coding	-4.11597	4.1612	5.2015	0	0.544098	0.086986	0.930683
ENSMUSG00000026786	Apbb1ip	protein_coding	0.814147	4.11597	5.69903	0.814147	3.62346	2.86113	0.00422136
ENSMUSG00000039637	Coro7	protein_coding	1.17599	4.11597	5.60857	1.17599	2.87965	2.09195	0.036443
ENSMUSG00000030611	Mrps11	protein_coding	1.26645	4.11597	5.87995	1.26645	2.55955	1.76286	0.0779248
ENSMUSG00000097340	Gm26617	lincRNA	0.904608	4.11597	5.56334	0.904608	2.4567	1.65842	0.0972333
ENSMUSG00000020289	Nprl3	protein_coding	0.271382	4.11597	5.60857	0.271382	2.37098	1.56821	0.116833
ENSMUSG00000063439	B9d2	protein_coding	0	4.11597	5.38242	0	1.98522	1.20066	0.229882
ENSMUSG00000037787	Apopt1	protein_coding	-0.0904608	4.11597	5.6538	0	1.89996	1.11915	0.263075
ENSMUSG00000083097	Gm14494	processed_pseudogene	-0.226152	4.11597	6.06087	0	1.84948	1.07282	0.283352
ENSMUSG00000029458	Brap	protein_coding	-0.226152	4.11597	5.92518	0	1.83704	1.06159	0.288422
ENSMUSG00000053329	D10Jhu81e	protein_coding	-0.633226	4.11597	5.47288	0	1.71019	0.946882	0.343699
ENSMUSG00000036459	Wtip	protein_coding	-0.859378	4.11597	5.69903	0	1.66143	0.89916	0.368568
ENSMUSG00000029920	Smarcad1	protein_coding	-1.94491	4.11597	5.97041	0	1.03359	0.389072	0.697223
ENSMUSG00000016946	Kctd5	protein_coding	-3.21136	4.11597	5.42765	0	0.969848	0.34373	0.731049
ENSMUSG00000029009	Mthfr	protein_coding	2.03537	4.07074	5.51811	2.03537	3.64395	2.88338	0.00393428
ENSMUSG00000075334	Rprm	protein_coding	0.271382	4.07074	5.78949	0.271382	3.36142	2.59084	0.0095742
ENSMUSG00000014592	Camta1	protein_coding	-0.0452304	4.07074	5.47288	0	1.95959	1.17656	0.239371
ENSMUSG00000097493	9930014A18Rik	processed_transcript	-0.316613	4.07074	5.51811	0	1.88458	1.10632	0.268589
ENSMUSG00000019437	Tlcd1	protein_coding	-0.678456	4.07074	5.74426	0	1.78845	1.02048	0.307499
ENSMUSG00000051166	Eml5	protein_coding	-1.0403	4.07074	5.6538	0	1.63226	0.873118	0.382599
ENSMUSG00000096696	Zfp960	protein_coding	-1.58306	4.07074	5.56334	0	1.35045	0.630593	0.528307
ENSMUSG00000063684	Gm13910	processed_pseudogene	-2.35198	4.07074	5.51811	0	0.953849	0.332223	0.739721
ENSMUSG00000034543	Morc2a	protein_coding	-2.71382	4.07074	5.74426	0	0.687952	0.161676	0.871561
ENSMUSG00000014859	E2f4	protein_coding	-4.20643	4.07074	5.33719	0	0.543812	0.0867359	0.930881
ENSMUSG00000024806	Mlana	protein_coding	0.226152	4.02551	5.51811	0.226152	3.29919	2.52822	0.0114641
ENSMUSG00000038010	Ccdc138	protein_coding	0.542765	4.02551	5.60857	0.542765	2.84307	2.05402	0.0399737
ENSMUSG00000022671	Mzt2	protein_coding	1.35691	4.02551	5.69903	1.35691	2.75181	1.95885	0.0501301
ENSMUSG00000020284	1810043G02Rik	protein_coding	0.768917	4.02551	5.56334	0.768917	2.65619	1.86375	0.0623563
ENSMUSG00000024381	Bin1	protein_coding	0.135691	4.02551	5.42765	0.135691	2.15985	1.36384	0.172619
ENSMUSG00000109118	Gm45109	bidirectional_promoter_lncRNA	-0.678456	4.02551	5.87995	0	1.64155	0.879855	0.378938
ENSMUSG00000052533	Nup188	protein_coding	-1.62829	4.02551	5.29196	0	1.34845	0.629157	0.529247
ENSMUSG00000054079	Utp18	protein_coding	-1.44737	4.02551	5.56334	0	1.16481	0.48349	0.628748
ENSMUSG00000001632	Brpf1	protein_coding	-3.25659	4.02551	5.47288	0	0.732158	0.189154	0.849972
ENSMUSG00000026565	Pou2f1	protein_coding	-2.75905	4.02551	5.47288	0	0.68447	0.159797	0.873041
ENSMUSG00000025477	Inpp5a	protein_coding	1.94491	3.98028	5.56334	1.94491	3.91164	3.15981	0.00157871
ENSMUSG00000037348	Paqr7	protein_coding	0.723686	3.98028	5.47288	0.723686	3.40755	2.63506	0.00841221
ENSMUSG00000045055	Rpsa-ps2	processed_pseudogene	0.0904608	3.98028	5.69903	0.0904608	2.02112	1.23404	0.217188
ENSMUSG00000085741	5430405H02Rik	processed_transcript	0	3.98028	5.74426	0	1.97361	1.19054	0.233832
ENSMUSG00000041747	Utp15	protein_coding	-0.587995	3.98028	5.42765	0	1.71639	0.951241	0.341482
ENSMUSG00000055612	Cdca7	protein_coding	-0.949838	3.98028	5.42765	0	1.59538	0.843614	0.398885
ENSMUSG00000022707	Gbe1	protein_coding	-1.40214	3.98028	5.47288	0	1.4597	0.727098	0.467166
ENSMUSG00000025962	Fastkd2	protein_coding	-1.53783	3.98028	5.47288	0	1.43432	0.704829	0.480917
ENSMUSG00000027650	Tti1	protein_coding	-1.67352	3.98028	5.38242	0	1.36727	0.643333	0.520008
ENSMUSG00000031077	Fadd	protein_coding	-1.94491	3.98028	5.56334	0	0.965327	0.34061	0.733397
ENSMUSG00000001518	Itfg2	protein_coding	-2.17106	3.98028	5.6538	0	0.802674	0.230178	0.817953
ENSMUSG00000039676	Capsl	protein_coding	-3.1209	3.98028	5.83472	0	0.641071	0.138259	0.890036
ENSMUSG00000041263	Rusc1	protein_coding	-4.11597	3.98028	5.51811	0	0.471136	0.0552187	0.955964
ENSMUSG00000079037	Prnp	protein_coding	2.35198	3.93504	5.78949	2.35198	5.77914	5.05479	4.30859e-07
ENSMUSG00000020387	Jade2	protein_coding	1.67352	3.93504	5.78949	1.67352	3.62311	2.86106	0.00422224
ENSMUSG00000001151	Pcnt	protein_coding	0.859378	3.93504	5.92518	0.859378	2.98548	2.20226	0.0276468
ENSMUSG00000020137	Thap2	protein_coding	1.26645	3.93504	5.47288	1.26645	2.90612	2.11864	0.0341208
ENSMUSG00000032743	D430042O09Rik	protein_coding	0.995069	3.93504	5.6538	0.995069	2.72408	1.93005	0.0536011
ENSMUSG00000026135	Zfp142	protein_coding	0.497534	3.93504	5.24673	0.497534	2.5605	1.7636	0.0778001
ENSMUSG00000045377	Tmem88	protein_coding	0.180922	3.93504	5.42765	0.180922	2.1585	1.36268	0.172983
ENSMUSG00000028420	Tmem38b	protein_coding	-0.678456	3.93504	5.92518	0	1.78313	1.01477	0.310214
ENSMUSG00000051786	Tubgcp6	protein_coding	-0.407074	3.93504	5.47288	0	1.78316	1.01477	0.310214
ENSMUSG00000038564	Ift172	protein_coding	-1.58306	3.93504	5.78949	0	1.28903	0.58223	0.560412
ENSMUSG00000039686	Zer1	protein_coding	-1.62829	3.93504	5.42765	0	1.25963	0.556574	0.577818
ENSMUSG00000100691	2010320M18Rik	lincRNA	-1.76399	3.93504	5.38242	0	1.02297	0.381788	0.702619
ENSMUSG00000006800	Sulf2	protein_coding	-2.30675	3.93504	5.69903	0	0.812034	0.236088	0.813364
ENSMUSG00000034203	Chchd4	protein_coding	-2.39721	3.93504	5.2015	0	0.686888	0.16124	0.871905
ENSMUSG00000020955	Ap4s1	protein_coding	1.58306	3.88981	5.60857	1.58306	2.75233	1.95924	0.0500842
ENSMUSG00000022807	Osbpl11	protein_coding	1.0403	3.88981	5.69903	1.0403	2.51676	1.72263	0.0849547
ENSMUSG00000042734	Ttc9	protein_coding	0.497534	3.88981	5.56334	0.497534	2.38019	1.57738	0.114708
ENSMUSG00000031161	Hdac6	protein_coding	-0.226152	3.88981	5.33719	0	1.7534	0.98627	0.324001
ENSMUSG00000040606	Kazn	protein_coding	-0.452304	3.88981	5.29196	0	1.56867	0.821081	0.4116
ENSMUSG00000006154	Eps8l1	protein_coding	-0.995069	3.88981	5.83472	0	1.48158	0.74641	0.45542
ENSMUSG00000094103	1700047I17Rik2	protein_coding	-1.13076	3.88981	5.74426	0	1.38287	0.657853	0.510632
ENSMUSG00000034789	Rab24	protein_coding	-2.30675	3.88981	5.38242	0	1.13052	0.457672	0.647188
ENSMUSG00000030124	Lag3	protein_coding	2.03537	3.84458	5.38242	2.03537	3.64393	2.88338	0.00393428
ENSMUSG00000046079	Lrrc8d	protein_coding	1.26645	3.84458	6.01564	1.26645	3.34342	2.57342	0.01007
ENSMUSG00000061167	Rpl15-ps3	processed_pseudogene	0.995069	3.84458	5.87995	0.995069	2.96955	2.18507	0.0288838
ENSMUSG00000022130	Tgds	protein_coding	-0.0452304	3.84458	5.33719	0	1.90315	1.12125	0.262181
ENSMUSG00000091509	Gm17066	processed_transcript	-0.271382	3.84458	6.33226	0	1.80849	1.0374	0.29955
ENSMUSG00000028917	Plekhm2	protein_coding	-1.4926	3.84458	5.47288	0	1.49236	0.755928	0.449693
ENSMUSG00000038241	Cep250	protein_coding	-3.16613	3.84458	5.29196	0	0.413126	0.0319964	0.974475
ENSMUSG00000025810	Nrp1	protein_coding	2.48767	3.79935	6.06087	2.48767	5.3367	4.61868	3.86197e-06
ENSMUSG00000031951	Tmem231	protein_coding	2.03537	3.79935	5.42765	2.03537	4.791	4.08097	4.48481e-05
ENSMUSG00000106352	5033403H07Rik	processed_transcript	1.22122	3.79935	5.6538	1.22122	4.18013	3.44517	0.000570691
ENSMUSG00000024948	Map4k2	protein_coding	1.94491	3.79935	5.83472	1.94491	3.4581	2.68666	0.0072171
ENSMUSG00000030685	Kctd13	protein_coding	0.904608	3.79935	5.33719	0.904608	2.32101	1.51819	0.128965
ENSMUSG00000075391	Gm13443	processed_pseudogene	-0.497534	3.79935	5.69903	0	1.64587	0.884323	0.376522
ENSMUSG00000002661	Alkbh7	protein_coding	-1.13076	3.79935	5.47288	0	1.64223	0.880635	0.378516
ENSMUSG00000065145	Vaultrc5	misc_RNA	-1.76399	3.79935	5.47288	0	1.24319	0.544887	0.585831
ENSMUSG00000027709	Mccc1	protein_coding	-2.71382	3.79935	5.42765	0	1.06951	0.411968	0.680363
ENSMUSG00000047921	Trappc9	protein_coding	-2.39721	3.79935	5.29196	0	0.839171	0.251385	0.801516
ENSMUSG00000021062	Rab15	protein_coding	0.814147	3.75412	5.97041	0.814147	3.86894	3.11344	0.00184918
ENSMUSG00000038539	Atf5	protein_coding	0.316613	3.75412	5.69903	0.316613	3.42711	2.65636	0.00789903
ENSMUSG00000000732	Icosl	protein_coding	1.0403	3.75412	5.24673	1.0403	2.96789	2.18324	0.0290183
ENSMUSG00000030786	Itgam	protein_coding	0.180922	3.75412	5.29196	0.180922	2.65607	1.86375	0.0623563
ENSMUSG00000035439	Haus8	protein_coding	-0.497534	3.75412	5.33719	0	1.49856	0.76223	0.445923
ENSMUSG00000041025	Iffo2	protein_coding	-1.17599	3.75412	5.15627	0	1.37775	0.653066	0.513713
ENSMUSG00000019731	Slc35e1	protein_coding	-2.71382	3.75412	5.29196	0	1.20485	0.514653	0.606795
ENSMUSG00000036570	Fxyd1	protein_coding	0.723686	3.70889	5.2015	0.723686	3.92509	3.17163	0.00151587
ENSMUSG00000050310	Rictor	protein_coding	0.949838	3.70889	6.60364	0.949838	3.10495	2.32732	0.0199484
ENSMUSG00000092395	Gm20463	antisense	0.271382	3.70889	5.47288	0.271382	2.12098	1.32841	0.184043
ENSMUSG00000002297	Dbf4	protein_coding	-0.180922	3.70889	5.24673	0	1.705	0.942322	0.346028
ENSMUSG00000102725	Gm37939	TEC	-2.44244	3.70889	5.24673	0	1.04389	0.396629	0.691641
ENSMUSG00000003531	Dgcr6	protein_coding	-2.17106	3.70889	5.2015	0	1.03223	0.387481	0.6984
ENSMUSG00000054455	Vapb	protein_coding	-3.61843	3.70889	5.33719	0	1.01265	0.373984	0.708417
ENSMUSG00000019979	Apaf1	protein_coding	-4.52304	3.70889	5.24673	0	0.430475	0.0389264	0.968949
ENSMUSG00000025591	Tma16	protein_coding	0.407074	3.66366	5.47288	0.407074	3.0116	2.22771	0.0259001
ENSMUSG00000036225	Kctd1	protein_coding	1.44737	3.66366	5.47288	1.44737	2.75603	1.96214	0.0497461
ENSMUSG00000022614	Lmf2	protein_coding	-0.995069	3.66366	5.60857	0	1.69692	0.934131	0.350236
ENSMUSG00000053158	Fes	protein_coding	-1.94491	3.66366	5.24673	0	1.50394	0.766465	0.443399
ENSMUSG00000002984	Tomm40	protein_coding	-1.13076	3.66366	5.33719	0	1.47502	0.740819	0.458803
ENSMUSG00000054517	Trim65	protein_coding	-3.25659	3.66366	5.11104	0	0.745546	0.19454	0.845753
ENSMUSG00000029547	Ints1	protein_coding	-4.1612	3.66366	5.0658	0	0.330407	0.00151615	0.99879
ENSMUSG00000040752	Myh6	protein_coding	1.26645	3.61843	5.38242	1.26645	3.31494	2.54255	0.0110047
ENSMUSG00000030397	Mark4	protein_coding	0.497534	3.61843	5.15627	0.497534	3.0523	2.26986	0.0232163
ENSMUSG00000019861	Gopc	protein_coding	1.44737	3.61843	5.56334	1.44737	3.04609	2.26279	0.0236487
ENSMUSG00000029651	Mtus2	protein_coding	1.0403	3.61843	5.24673	1.0403	2.88334	2.09643	0.0360438
ENSMUSG00000001016	Ilf2	protein_coding	0.135691	3.61843	6.15133	0.135691	2.08494	1.29373	0.19576
ENSMUSG00000055980	Irs1	protein_coding	0.271382	3.61843	5.47288	0.271382	2.0161	1.22988	0.218741
ENSMUSG00000027361	Gabpb1	protein_coding	-0.180922	3.61843	5.24673	0	1.83809	1.06224	0.288127
ENSMUSG00000037798	Mat1a	protein_coding	-1.40214	3.61843	5.74426	0	1.72844	0.963338	0.335378
ENSMUSG00000074922	Fam122a	protein_coding	-1.13076	3.61843	5.47288	0	1.50255	0.765905	0.443733
ENSMUSG00000020536	Llgl1	protein_coding	-3.5732	3.61843	5.15627	0	0.622241	0.127333	0.898677
ENSMUSG00000044250	Pced1b	protein_coding	0.452304	3.5732	5.42765	0.452304	3.19264	2.4184	0.0155891
ENSMUSG00000052482	Gm8174	processed_pseudogene	0.587995	3.5732	5.56334	0.587995	2.39168	1.58862	0.112147
ENSMUSG00000031490	Eif4ebp1	protein_coding	0.452304	3.5732	5.83472	0.452304	2.33889	1.53651	0.124414
ENSMUSG00000027430	Dtd1	protein_coding	0.135691	3.5732	5.33719	0.135691	2.05361	1.26369	0.206342
ENSMUSG00000029283	Cdc7	protein_coding	0.180922	3.5732	4.93011	0.180922	2.02921	1.24102	0.214599
ENSMUSG00000064348	mt-Tn	Mt_tRNA	-0.678456	3.5732	5.56334	0	1.61319	0.858844	0.390426
ENSMUSG00000023272	Creld2	protein_coding	-1.26645	3.5732	5.33719	0	1.51912	0.777908	0.436623
ENSMUSG00000024726	Carnmt1	protein_coding	-1.62829	3.5732	5.60857	0	1.36597	0.642594	0.520487
ENSMUSG00000106847	Peg13	sense_intronic	-3.07567	3.5732	4.83965	0	0.566347	0.100256	0.920141
ENSMUSG00000024610	Cd74	protein_coding	2.39721	3.52797	5.47288	2.39721	6.91898	6.18759	6.10892e-10
ENSMUSG00000058392	Rrp1b	protein_coding	0.180922	3.52797	5.24673	0.180922	2.27497	1.47373	0.140555
ENSMUSG00000033618	Map3k13	protein_coding	0.452304	3.52797	5.42765	0.452304	2.15064	1.3549	0.17545
ENSMUSG00000024019	Cmtr1	protein_coding	-0.361843	3.52797	5.51811	0	1.78818	1.02048	0.307499
ENSMUSG00000063543	Gm5616	protein_coding	-0.633226	3.52797	5.51811	0	1.63977	0.878399	0.379727
ENSMUSG00000081824	BC002163	processed_pseudogene	-0.723686	3.52797	5.60857	0	1.60871	0.855965	0.392017
ENSMUSG00000040415	Dtx3	protein_coding	1.85445	3.48274	5.33719	1.85445	3.37519	2.60538	0.00917718
ENSMUSG00000105552	Gm19710	lincRNA	0.361843	3.48274	5.38242	0.361843	2.31	1.50868	0.131381
ENSMUSG00000038975	Rabggtb	protein_coding	0.226152	3.48274	5.74426	0.226152	2.10769	1.31651	0.188004
ENSMUSG00000017478	Zc3h18	protein_coding	-0.452304	3.48274	5.83472	0	1.70205	0.939729	0.347356
ENSMUSG00000027936	Crtc2	protein_coding	-1.0403	3.48274	5.24673	0	1.53599	0.790333	0.429333
ENSMUSG00000073062	Zxdb	protein_coding	-1.58306	3.48274	5.15627	0	1.12358	0.451471	0.65165
ENSMUSG00000026439	Rbbp5	protein_coding	-3.79935	3.48274	5.33719	0	0.362422	0.0145109	0.988422
ENSMUSG00000004347	Pde1c	protein_coding	1.08553	3.43751	5.42765	1.08553	3.31377	2.54171	0.0110312
ENSMUSG00000081359	Cox20-ps	processed_pseudogene	1.17599	3.43751	5.47288	1.17599	2.9133	2.12587	0.0335141
ENSMUSG00000016239	Lonrf3	protein_coding	-0.0904608	3.43751	5.11104	0	1.92565	1.14487	0.252263
ENSMUSG00000082938	Gm2810	processed_pseudogene	-0.949838	3.43751	5.69903	0	1.54912	0.802002	0.422552
ENSMUSG00000032534	Cep63	protein_coding	-1.40214	3.43751	4.88488	0	1.42715	0.698534	0.484843
ENSMUSG00000001376	Vps50	protein_coding	-1.62829	3.43751	5.47288	0	1.3481	0.628818	0.529468
ENSMUSG00000024319	Vps52	protein_coding	-1.99014	3.43751	5.11104	0	0.949962	0.329336	0.741902
ENSMUSG00000024851	Pitpnm1	protein_coding	-3.21136	3.43751	4.79442	0	0.453645	0.0462989	0.963072
ENSMUSG00000001948	Spa17	protein_coding	0.316613	3.39228	5.02057	0.316613	3.44422	2.67356	0.00750517
ENSMUSG00000038642	Ctss	protein_coding	1.35691	3.39228	6.06087	1.35691	3.36273	2.5915	0.00955585
ENSMUSG00000043079	Synpo	protein_coding	0.316613	3.39228	5.60857	0.316613	2.65552	1.8637	0.0623633
ENSMUSG00000024769	Cdc42bpg	protein_coding	-1.67352	3.39228	5.51811	0	1.03995	0.39425	0.693397
ENSMUSG00000031278	Acsl4	protein_coding	2.35198	3.34705	6.82979	2.35198	6.80159	6.08121	1.19279e-09
ENSMUSG00000073421	H2-Ab1	protein_coding	2.26152	3.34705	9.13654	2.26152	6.67071	5.95306	2.63177e-09
ENSMUSG00000000263	Glra1	protein_coding	1.35691	3.34705	5.42765	1.35691	4.42647	3.69931	0.000216182
ENSMUSG00000001482	Def8	protein_coding	0.361843	3.34705	5.0658	0.361843	3.59709	2.83335	0.00460626
ENSMUSG00000033417	Cacul1	protein_coding	1.08553	3.34705	6.06087	1.08553	3.03838	2.25506	0.0241297
ENSMUSG00000078350	Smim1	protein_coding	-0.180922	3.34705	5.87995	0	1.85531	1.07829	0.280902
ENSMUSG00000029056	Pank4	protein_coding	-0.316613	3.34705	4.93011	0	1.85307	1.07641	0.281746
ENSMUSG00000057286	St6galnac2	protein_coding	-1.22122	3.34705	5.38242	0	1.5809	0.831669	0.405596
ENSMUSG00000079215	Zfp664	protein_coding	-0.814147	3.34705	6.06087	0	1.56078	0.813202	0.416102
ENSMUSG00000079283	2310009B15Rik	protein_coding	-1.31168	3.34705	5.02057	0	1.30074	0.590662	0.554747
ENSMUSG00000030423	Pop4	protein_coding	-1.94491	3.34705	4.88488	0	1.30089	0.590662	0.554747
ENSMUSG00000038025	Phf2	protein_coding	-2.0806	3.34705	5.47288	0	1.07313	0.414108	0.678795
ENSMUSG00000000282	Mnt	protein_coding	-2.30675	3.34705	5.02057	0	1.00058	0.365145	0.715004
ENSMUSG00000042804	Gpr153	protein_coding	0.949838	3.30182	5.02057	0.949838	4.27888	3.54534	0.000392105
ENSMUSG00000055413	H2-Q5	polymorphic_pseudogene	0.407074	3.30182	5.29196	0.407074	2.41573	1.6142	0.106483
ENSMUSG00000058230	Arhgap35	protein_coding	0.0452304	3.30182	5.87995	0.0452304	2.00739	1.22117	0.222022
ENSMUSG00000028549	Itgb3bp	protein_coding	0	3.30182	4.93011	0	1.96558	1.18203	0.237195
ENSMUSG00000041949	Tango6	protein_coding	-0.271382	3.30182	5.15627	0	1.73499	0.96837	0.332859
ENSMUSG00000046574	Prr12	protein_coding	-0.995069	3.30182	5.15627	0	1.43871	0.70952	0.478002
ENSMUSG00000024807	Syvn1	protein_coding	-2.17106	3.30182	5.42765	0	1.14399	0.468087	0.639723
ENSMUSG00000060923	Acyp2	protein_coding	0.407074	3.25659	4.93011	0.407074	2.33001	1.52719	0.126713
ENSMUSG00000073405	C920025E04Rik	unprocessed_pseudogene	1.08553	3.25659	6.19656	1.08553	2.11503	1.32364	0.185624
ENSMUSG00000059714	Flot1	protein_coding	-0.226152	3.25659	5.69903	0	1.8641	1.08772	0.276721
ENSMUSG00000018572	Phf23	protein_coding	-2.71382	3.25659	4.93011	0	0.866945	0.272832	0.784982
ENSMUSG00000032902	Slc16a1	protein_coding	1.58306	3.21136	7.41779	1.58306	4.1839	3.44844	0.000563829
ENSMUSG00000024925	Rnaseh2c	protein_coding	-1.40214	3.21136	5.0658	0	1.39936	0.673605	0.500562
ENSMUSG00000059237	Ppp1r2-ps4	processed_pseudogene	-2.62336	3.21136	4.83965	0	0.955813	0.333249	0.738946
ENSMUSG00000035798	Zdhhc17	protein_coding	-3.25659	3.21136	5.02057	0	0.534941	0.0830967	0.933775
ENSMUSG00000002948	Map2k7	protein_coding	1.0403	3.16613	5.33719	1.0403	2.72015	1.92642	0.0540523
ENSMUSG00000021226	Acot2	protein_coding	0.542765	3.16613	5.74426	0.542765	2.64405	1.85124	0.0641347
ENSMUSG00000033819	Ppp1r16a	protein_coding	0.859378	3.16613	5.56334	0.859378	2.48731	1.68972	0.0910811
ENSMUSG00000021236	Entpd5	protein_coding	-5.02057	3.16613	4.6135	0	0.692722	0.163923	0.869792
ENSMUSG00000078153	Psme2b	protein_coding	-4.38735	3.16613	4.70396	0	0.416744	0.0336426	0.973162
ENSMUSG00000031441	Atp11a	protein_coding	1.94491	3.1209	6.92025	1.94491	5.46469	4.73904	2.14731e-06
ENSMUSG00000025153	Fasn	protein_coding	1.80922	3.1209	7.82486	1.80922	4.45898	3.73125	0.000190531
ENSMUSG00000029672	Fam3c	protein_coding	1.35691	3.1209	6.37749	1.35691	3.76301	3.00743	0.00263467
ENSMUSG00000064326	Siva1	protein_coding	0.814147	3.1209	6.73933	0.814147	2.70922	1.91607	0.0553559
ENSMUSG00000066440	Zfyve26	protein_coding	0.271382	3.1209	4.88488	0.271382	2.30116	1.49961	0.133716
ENSMUSG00000022386	Trmu	protein_coding	0.271382	3.1209	5.15627	0.271382	2.17402	1.37721	0.168447
ENSMUSG00000070730	Rmdn3	protein_coding	-0.633226	3.1209	5.6538	0	1.58477	0.835873	0.403227
ENSMUSG00000025348	Itga7	protein_coding	-1.71876	3.1209	5.42765	0	1.34857	0.629157	0.529247
ENSMUSG00000024101	Wash1	protein_coding	-1.22122	3.1209	4.88488	0	1.33405	0.616419	0.537618
ENSMUSG00000097412	1810014B01Rik	lincRNA	-1.31168	3.1209	4.97534	0	1.27461	0.568085	0.569977
ENSMUSG00000027088	Phospho2	protein_coding	-1.94491	3.1209	5.02057	0	1.2187	0.525041	0.599554
ENSMUSG00000035051	Dhx57	protein_coding	-3.48274	3.1209	4.88488	0	1.00529	0.368767	0.712302
ENSMUSG00000063275	Hacd1	protein_coding	-2.5329	3.1209	4.88488	0	0.789215	0.223567	0.823095
ENSMUSG00000023951	Vegfa	protein_coding	1.0403	3.07567	6.51318	1.0403	3.26972	2.49649	0.0125429
ENSMUSG00000042369	Rbm45	protein_coding	0.316613	3.07567	5.47288	0.316613	2.58931	1.79441	0.0727473
ENSMUSG00000110368	RP23-96H18.2	lincRNA	-0.0452304	3.07567	5.02057	0	1.94887	1.16631	0.243488
ENSMUSG00000002105	Slc39a13	protein_coding	-1.67352	3.07567	5.11104	0	1.73523	0.968499	0.332795
ENSMUSG00000024772	Ehd1	protein_coding	-0.452304	3.07567	5.92518	0	1.69453	0.932021	0.351326
ENSMUSG00000073437	D330041H03Rik	processed_transcript	1.4926	3.03044	7.19163	1.4926	3.99674	3.25123	0.00114908
ENSMUSG00000020262	Adarb1	protein_coding	0.316613	3.03044	4.97534	0.316613	3.45806	2.68666	0.0072171
ENSMUSG00000036934	4921524J17Rik	protein_coding	0.180922	3.03044	5.02057	0.180922	2.30207	1.50061	0.133457
ENSMUSG00000035049	Rrp12	protein_coding	-0.135691	3.03044	4.88488	0	1.91232	1.1296	0.258644
ENSMUSG00000078653	Cntd1	protein_coding	-0.949838	3.03044	5.29196	0	1.62467	0.868	0.385394
ENSMUSG00000037405	Icam1	protein_coding	1.67352	2.98521	7.64394	1.67352	4.59043	3.8721	0.000107902
ENSMUSG00000029312	Klhl8	protein_coding	1.0403	2.98521	5.0658	1.0403	4.34404	3.61299	0.000302687
ENSMUSG00000020847	Rph3al	protein_coding	0.768917	2.98521	5.2015	0.768917	2.89235	2.10576	0.0352251
ENSMUSG00000065259	Snora30	snoRNA	1.22122	2.98521	6.42272	1.22122	2.8716	2.08326	0.0372279
ENSMUSG00000017679	Ttpal	protein_coding	0.678456	2.98521	5.47288	0.678456	2.8548	2.06638	0.0387929
ENSMUSG00000029449	Rhof	protein_coding	-0.678456	2.98521	6.2418	0	1.64781	0.886213	0.375503
ENSMUSG00000020108	Ddit4	protein_coding	-1.0403	2.98521	5.11104	0	1.4491	0.719718	0.471699
ENSMUSG00000062846	Gm14176	processed_pseudogene	-1.22122	2.98521	5.51811	0	1.42956	0.700327	0.483723
ENSMUSG00000026715	Serpinc1	protein_coding	-3.88981	2.98521	4.65873	0	0.66462	0.150915	0.880042
ENSMUSG00000030281	Il17rc	protein_coding	-3.34705	2.98521	4.70396	0	0.39601	0.0262087	0.979091
ENSMUSG00000025203	Scd2	protein_coding	1.62829	2.93998	6.92025	1.62829	4.67619	3.96377	7.37764e-05
ENSMUSG00000032244	Fem1b	protein_coding	1.31168	2.93998	6.01564	1.31168	3.54003	2.77151	0.00557967
ENSMUSG00000096944	Gm26722	lincRNA	-1.40214	2.93998	5.15627	0	1.42518	0.696429	0.48616
ENSMUSG00000037887	Dusp8	protein_coding	-2.93998	2.93998	4.70396	0	1.18061	0.495631	0.620155
ENSMUSG00000074166	AW146154	protein_coding	-5.29196	2.93998	4.83965	0	0.166942	0	1
ENSMUSG00000020823	Sec14l1	protein_coding	0.542765	2.89475	6.64887	0.542765	2.4616	1.66255	0.0964023
ENSMUSG00000062929	Cfl2	protein_coding	0.452304	2.89475	6.33226	0.452304	2.40055	1.59779	0.11009
ENSMUSG00000024911	Fibp	protein_coding	0.0452304	2.89475	5.56334	0.0452304	2.01605	1.22988	0.218741
ENSMUSG00000053950	Adnp2	protein_coding	-0.497534	2.89475	4.83965	0	1.58652	0.837216	0.402471
ENSMUSG00000076036	Gm22133	miRNA	-1.4926	2.89475	4.88488	0	1.20748	0.516207	0.60571
ENSMUSG00000049957	Ccdc137	protein_coding	-2.26152	2.89475	5.2015	0	1.16894	0.487619	0.62582
ENSMUSG00000026974	Zmynd19	protein_coding	-3.88981	2.89475	4.65873	0	1.0653	0.410478	0.681455
ENSMUSG00000026942	Traf2	protein_coding	-2.35198	2.89475	5.47288	0	1.01508	0.376196	0.706772
ENSMUSG00000072763	5430403G16Rik	protein_coding	0.316613	2.84952	4.88488	0.316613	3.01658	2.23262	0.025574
ENSMUSG00000059920	4930453N24Rik	protein_coding	0	2.84952	5.6538	0	1.97187	1.18863	0.234584
ENSMUSG00000040618	Pck2	protein_coding	-0.542765	2.84952	5.15627	0	1.70831	0.945819	0.344241
ENSMUSG00000019470	Xab2	protein_coding	-2.84952	2.84952	4.79442	0	0.703728	0.171766	0.863622
ENSMUSG00000032349	Elovl5	protein_coding	1.62829	2.80428	5.33719	1.62829	5.01873	4.30972	1.63459e-05
ENSMUSG00000067925	Cxx1a	protein_coding	1.0403	2.80428	5.33719	1.0403	4.38426	3.65437	0.000257815
ENSMUSG00000022048	Dpysl2	protein_coding	1.40214	2.80428	6.73933	1.40214	4.0735	3.33452	0.000854474
ENSMUSG00000030246	Ldhb	protein_coding	1.44737	2.80428	7.77963	1.44737	3.77695	3.0218	0.00251279
ENSMUSG00000097381	A230087F16Rik	lincRNA	-0.135691	2.80428	5.15627	0	1.89704	1.11612	0.264373
ENSMUSG00000038658	Ric1	protein_coding	0.859378	2.75905	6.92025	0.859378	2.7788	1.98626	0.047004
ENSMUSG00000022992	Kansl2	protein_coding	-0.0452304	2.75905	5.60857	0	1.93499	1.15318	0.248836
ENSMUSG00000020864	Ankrd40	protein_coding	-0.361843	2.75905	4.88488	0	1.70014	0.937811	0.348341
ENSMUSG00000042308	Setd1a	protein_coding	-1.0403	2.75905	4.74919	0	1.39756	0.672285	0.501402
ENSMUSG00000024902	Mrpl11	protein_coding	-4.74919	2.75905	4.56827	0	0.0784422	0	1
ENSMUSG00000030701	Plekhb1	protein_coding	0.633226	2.71382	5.15627	0.633226	2.5741	1.7769	0.0755853
ENSMUSG00000027804	Ppid	protein_coding	0.135691	2.71382	6.55841	0.135691	2.10014	1.30812	0.190832
ENSMUSG00000021820	Camk2g	protein_coding	-0.135691	2.71382	6.28703	0	1.89225	1.11261	0.265878
ENSMUSG00000033411	Ctdspl2	protein_coding	-0.678456	2.71382	5.38242	0	1.54108	0.795261	0.426462
ENSMUSG00000034154	Ino80	protein_coding	-0.995069	2.71382	5.97041	0	1.50144	0.765201	0.444152
ENSMUSG00000029196	Tada2b	protein_coding	-2.0806	2.71382	5.0658	0	1.45026	0.720461	0.471241
ENSMUSG00000075705	Msrb1	protein_coding	-1.35691	2.71382	4.83965	0	1.187	0.500985	0.616382
ENSMUSG00000034748	Sirt6	protein_coding	-1.76399	2.71382	5.60857	0	1.13888	0.464984	0.641943
ENSMUSG00000033467	Crlf2	protein_coding	0.407074	2.66859	4.65873	0.407074	2.83488	2.04679	0.0406784
ENSMUSG00000027593	Raly	protein_coding	0.0452304	2.66859	4.88488	0.0452304	2.05978	1.26794	0.20482
ENSMUSG00000036646	Man1b1	protein_coding	-1.0403	2.66859	5.42765	0	1.54911	0.802002	0.422552
ENSMUSG00000005575	Ube2m	protein_coding	-1.58306	2.66859	5.02057	0	1.46306	0.729977	0.465404
ENSMUSG00000042712	Wbp5	protein_coding	1.4926	2.62336	3.84458	1.4926	4.61289	3.89511	9.81523e-05
ENSMUSG00000027201	Myef2	protein_coding	1.0403	2.62336	4.83965	1.0403	3.42635	2.65575	0.00791317
ENSMUSG00000066150	Slc31a1	protein_coding	0.678456	2.62336	5.15627	0.678456	2.69866	1.90484	0.0568004
ENSMUSG00000020894	Vamp2	protein_coding	-1.22122	2.62336	4.74919	0	1.5338	0.787633	0.430911
ENSMUSG00000074238	Ap1ar	protein_coding	-1.26645	2.62336	5.2015	0	1.26825	0.563308	0.573225
ENSMUSG00000028532	Cachd1	protein_coding	-2.26152	2.62336	4.97534	0	0.760376	0.205858	0.836902
ENSMUSG00000042502	Cd2bp2	protein_coding	-2.89475	2.62336	4.6135	0	0.742541	0.193734	0.846384
ENSMUSG00000091655	Gm8741	processed_pseudogene	-1.53783	2.57813	5.69903	0	1.17688	0.493319	0.621787
ENSMUSG00000098503	Gm27937	misc_RNA	-1.76399	2.57813	5.6538	0	1.08144	0.419348	0.674962
ENSMUSG00000023367	Tmem176a	protein_coding	1.13076	2.5329	4.56827	1.13076	3.62143	2.85935	0.00424509
ENSMUSG00000054619	Mettl7a1	protein_coding	1.0403	2.5329	8.05101	1.0403	3.48789	2.71643	0.00659911
ENSMUSG00000085783	Gm9816	processed_pseudogene	0.316613	2.5329	4.74919	0.316613	2.43839	1.63937	0.101136
ENSMUSG00000024007	Ppil1	protein_coding	0.0904608	2.5329	5.38242	0.0904608	2.02713	1.2395	0.21516
ENSMUSG00000085307	Gm11525	antisense	0	2.5329	4.6135	0	1.99018	1.20471	0.228317
ENSMUSG00000021578	Ccdc127	protein_coding	-0.452304	2.5329	5.51811	0	1.69419	0.931795	0.351442
ENSMUSG00000002365	Snx9	protein_coding	-0.587995	2.5329	5.33719	0	1.60231	0.850201	0.395214
ENSMUSG00000027981	Rnpc3	protein_coding	-0.859378	2.5329	6.37749	0	1.5611	0.813277	0.416059
ENSMUSG00000031352	Hccs	protein_coding	-1.80922	2.5329	5.0658	0	1.14969	0.471878	0.637014
ENSMUSG00000006732	Mettl1	protein_coding	-3.25659	2.5329	5.33719	0	0.855261	0.26548	0.79064
ENSMUSG00000032688	Malt1	protein_coding	0.859378	2.48767	5.56334	0.859378	3.01683	2.23262	0.025574
ENSMUSG00000026094	Stk17b	protein_coding	0.859378	2.48767	6.6941	0.859378	2.9542	2.1683	0.0301361
ENSMUSG00000015522	Arnt	protein_coding	-1.89968	2.48767	5.56334	0	1.18967	0.50322	0.61481
ENSMUSG00000071302	2610044O15Rik8	protein_coding	-3.70889	2.48767	4.52304	0	1.11737	0.445808	0.655736
ENSMUSG00000031633	Slc25a4	protein_coding	1.13076	2.44244	4.52304	1.13076	3.80073	3.04438	0.00233158
ENSMUSG00000074344	Tmigd3	protein_coding	0.407074	2.44244	4.74919	0.407074	3.64285	2.88241	0.00394642
ENSMUSG00000032932	Hspa13	protein_coding	0.452304	2.44244	4.97534	0.452304	2.44183	1.64243	0.1005
ENSMUSG00000020180	Snrpd3	protein_coding	0.316613	2.44244	7.05594	0.316613	2.23285	1.43508	0.151263
ENSMUSG00000104882	Gm43096	processed_pseudogene	0.180922	2.44244	5.29196	0.180922	2.14116	1.34758	0.177792
ENSMUSG00000021048	Mthfd1	protein_coding	-0.407074	2.44244	6.37749	0	1.72453	0.959597	0.337258
ENSMUSG00000022148	Fyb	protein_coding	-0.678456	2.44244	4.47781	0	1.465	0.731665	0.464373
ENSMUSG00000009035	Tmem184b	protein_coding	-1.13076	2.44244	5.11104	0	1.27759	0.571231	0.567843
ENSMUSG00000042298	Ttc19	protein_coding	-1.35691	2.44244	4.74919	0	1.22151	0.527496	0.597849
ENSMUSG00000046111	Cep295	protein_coding	-2.44244	2.44244	5.97041	0	1.08109	0.419348	0.674962
ENSMUSG00000024219	Anks1	protein_coding	-3.93504	2.44244	5.0658	0	0.761444	0.206183	0.836648
ENSMUSG00000039782	Cpeb2	protein_coding	-2.89475	2.44244	4.6135	0	0.490745	0.0643382	0.948701
ENSMUSG00000006390	Elovl1	protein_coding	1.17599	2.39721	3.66366	1.17599	3.87592	3.12112	0.00180166
ENSMUSG00000028771	Ptpn12	protein_coding	0.271382	2.39721	6.92025	0.271382	2.20861	1.41152	0.15809
ENSMUSG00000003062	Stard3nl	protein_coding	0.180922	2.39721	5.60857	0.180922	2.18626	1.38922	0.164766
ENSMUSG00000039233	Tbce	protein_coding	0.226152	2.39721	6.37749	0.226152	2.13727	1.34394	0.178968
ENSMUSG00000039253	Fn3krp	protein_coding	-0.0904608	2.39721	4.25166	0	1.88668	1.10842	0.267682
ENSMUSG00000017715	Pgs1	protein_coding	-0.180922	2.39721	6.01564	0	1.84664	1.0703	0.284485
ENSMUSG00000045671	Spred2	protein_coding	-3.03044	2.39721	4.65873	0	0.616478	0.124716	0.900748
ENSMUSG00000020528	Prpsap2	protein_coding	-3.75412	2.39721	5.15627	0	0.49006	0.064109	0.948883
ENSMUSG00000032238	Rora	protein_coding	0.949838	2.35198	7.96055	0.949838	3.15986	2.38389	0.0171309
ENSMUSG00000083669	Gm10169	processed_pseudogene	0.497534	2.35198	5.47288	0.497534	2.84263	2.05373	0.0400018
ENSMUSG00000001542	Ell2	protein_coding	0.633226	2.35198	6.46795	0.633226	2.74187	1.94862	0.0513404
ENSMUSG00000034165	Ccnd3	protein_coding	0.452304	2.35198	4.56827	0.452304	2.42828	1.6288	0.103355
ENSMUSG00000061474	Mrps36	protein_coding	-0.723686	2.35198	5.51811	0	1.44671	0.717381	0.473139
ENSMUSG00000029817	Tra2a	protein_coding	1.40214	2.30675	6.92025	1.40214	5.04856	4.33839	1.43532e-05
ENSMUSG00000044217	Aqp5	protein_coding	0.949838	2.30675	4.56827	0.949838	3.44143	2.67077	0.00756777
ENSMUSG00000039988	Ankrd13c	protein_coding	0.814147	2.30675	4.6135	0.814147	3.09156	2.31313	0.0207154
ENSMUSG00000028059	Arhgef2	protein_coding	0.678456	2.30675	5.87995	0.678456	2.7619	1.96853	0.0490075
ENSMUSG00000029213	Commd8	protein_coding	0.497534	2.30675	6.73933	0.497534	2.55612	1.75961	0.0784733
ENSMUSG00000024338	Psmb8	protein_coding	0.316613	2.30675	4.47781	0.316613	2.27776	1.47631	0.139861
ENSMUSG00000047368	Abhd17b	protein_coding	-0.316613	2.30675	6.37749	0	1.77309	1.00564	0.314589
ENSMUSG00000019464	Ptger1	protein_coding	-0.723686	2.30675	5.0658	0	1.64059	0.878937	0.379435
ENSMUSG00000031024	St5	protein_coding	-0.814147	2.30675	5.33719	0	1.44119	0.712189	0.476348
ENSMUSG00000005469	Prkaca	protein_coding	-1.0403	2.30675	4.83965	0	1.31056	0.598017	0.549829
ENSMUSG00000078789	Dph1	protein_coding	-2.93998	2.30675	4.25166	0	1.25977	0.556574	0.577818
ENSMUSG00000039236	Isg20	protein_coding	-1.89968	2.30675	6.06087	0	1.25215	0.550059	0.582279
ENSMUSG00000021144	Mta1	protein_coding	-2.48767	2.30675	4.6135	0	0.939371	0.324518	0.745546
ENSMUSG00000068874	Selenbp1	protein_coding	1.0403	2.26152	4.1612	1.0403	3.80005	3.04393	0.00233513
ENSMUSG00000022246	Rai14	protein_coding	0.904608	2.26152	4.74919	0.904608	3.36164	2.59084	0.0095742
ENSMUSG00000109357	Gm45236	TEC	0.859378	2.26152	5.0658	0.859378	3.34004	2.57035	0.0101595
ENSMUSG00000027351	Spred1	protein_coding	0.859378	2.26152	5.29196	0.859378	3.26894	2.49583	0.0125664
ENSMUSG00000080242	Gm15487	processed_pseudogene	0.542765	2.26152	5.83472	0.542765	2.63911	1.84585	0.0649138
ENSMUSG00000044986	Tst	protein_coding	0.316613	2.26152	4.65873	0.316613	2.35148	1.55009	0.121121
ENSMUSG00000024081	Cebpz	protein_coding	-0.0904608	2.26152	4.88488	0	1.91115	1.12882	0.258972
ENSMUSG00000091905	Gm6395	pseudogene	-0.587995	2.26152	5.33719	0	1.68497	0.922231	0.356408
ENSMUSG00000041654	Slc39a11	protein_coding	-1.22122	2.26152	4.83965	0	1.34076	0.621587	0.534213
ENSMUSG00000064347	mt-Ta	Mt_tRNA	-2.21629	2.26152	6.01564	0	0.956897	0.334275	0.738172
ENSMUSG00000106147	Rnu3a	snoRNA	-2.03537	2.26152	4.70396	0	0.939465	0.324518	0.745546
ENSMUSG00000021242	Npc2	protein_coding	1.35691	2.21629	3.07567	1.35691	5.47343	4.74737	2.06079e-06
ENSMUSG00000031762	Mt2	protein_coding	0.814147	2.21629	4.65873	0.814147	3.19456	2.41941	0.0155457
ENSMUSG00000018377	Vezf1	protein_coding	0.678456	2.21629	5.29196	0.678456	2.89722	2.11061	0.0348061
ENSMUSG00000028760	Eif4g3	protein_coding	0.452304	2.21629	5.2015	0.452304	2.51886	1.72413	0.0846841
ENSMUSG00000036745	Ttll7	protein_coding	0.361843	2.21629	6.87502	0.361843	2.28567	1.48441	0.1377
ENSMUSG00000023959	Clic5	protein_coding	0.271382	2.21629	4.70396	0.271382	2.23596	1.43765	0.150533
ENSMUSG00000020063	Sirt1	protein_coding	0.0452304	2.21629	4.56827	0.0452304	2.02494	1.23712	0.216044
ENSMUSG00000045954	Sdpr	protein_coding	0.0452304	2.21629	5.87995	0.0452304	2.00084	1.21567	0.224109
ENSMUSG00000022564	Grina	protein_coding	-0.768917	2.21629	4.43258	0	1.50673	0.76794	0.442523
ENSMUSG00000106133	Gm3724	processed_pseudogene	-1.94491	2.21629	5.33719	0	1.07881	0.417976	0.675965
ENSMUSG00000042302	Ehbp1	protein_coding	-4.56827	2.21629	4.52304	0	0.280832	0	1
ENSMUSG00000064357	mt-Atp6	protein_coding	1.35691	2.17106	2.93998	1.35691	5.73892	5.01415	5.32691e-07
ENSMUSG00000031246	Sh3bgrl	protein_coding	1.0403	2.17106	3.70889	1.0403	3.7688	3.01373	0.00258055
ENSMUSG00000029810	Tmem176b	protein_coding	0.995069	2.17106	3.30182	0.995069	3.61625	2.85405	0.00431658
ENSMUSG00000038172	Ttc39b	protein_coding	0.633226	2.17106	6.28703	0.633226	2.81726	2.02788	0.0425725
ENSMUSG00000031985	Gnpat	protein_coding	0.542765	2.17106	6.01564	0.542765	2.59306	1.79806	0.0721675
ENSMUSG00000003518	Dusp3	protein_coding	0.361843	2.17106	4.74919	0.361843	2.36869	1.56652	0.117227
ENSMUSG00000046432	Ngfrap1	protein_coding	0.271382	2.17106	4.20643	0.271382	2.26338	1.46231	0.143657
ENSMUSG00000107722	2900060B14Rik	antisense	-0.180922	2.17106	4.70396	0	1.77768	1.00952	0.312724
ENSMUSG00000029464	Gpn3	protein_coding	-2.71382	2.17106	5.92518	0	1.3119	0.59917	0.549059
ENSMUSG00000022664	Slc35a5	protein_coding	-3.66366	2.17106	4.70396	0	0.231783	0	1
ENSMUSG00000027533	Fabp5	protein_coding	0.587995	2.12583	4.25166	0.587995	2.84397	2.0549	0.0398889
ENSMUSG00000025757	Hspa4l	protein_coding	0.678456	2.12583	7.23686	0.678456	2.79882	2.00841	0.0446001
ENSMUSG00000032388	Spg21	protein_coding	0.271382	2.12583	6.33226	0.271382	2.25908	1.45837	0.144738
ENSMUSG00000027698	Nceh1	protein_coding	0.226152	2.12583	4.52304	0.226152	2.24574	1.4467	0.147982
ENSMUSG00000018906	P4ha2	protein_coding	0.0452304	2.12583	6.15133	0.0452304	2.01033	1.22414	0.220898
ENSMUSG00000027777	Schip1	protein_coding	0	2.12583	4.38735	0	1.97925	1.19519	0.232013
ENSMUSG00000032998	Foxj3	protein_coding	-0.995069	2.12583	4.38735	0	1.40425	0.678307	0.497577
ENSMUSG00000032469	Dbr1	protein_coding	-2.44244	2.12583	4.43258	0	1.28977	0.582771	0.560047
ENSMUSG00000022503	Nubp1	protein_coding	-1.40214	2.12583	5.11104	0	1.10724	0.437822	0.661515
ENSMUSG00000026707	Nsun6	protein_coding	-2.66859	2.12583	5.87995	0	0.924727	0.312281	0.754827
ENSMUSG00000031583	Wrn	protein_coding	-4.29689	2.12583	4.1612	0	0.184382	0	1
ENSMUSG00000020027	Socs2	protein_coding	0.768917	2.0806	3.79935	0.768917	3.29222	2.52101	0.0117018
ENSMUSG00000027803	Wwtr1	protein_coding	0.0904608	2.0806	6.96548	0.0904608	2.08868	1.29754	0.194446
ENSMUSG00000028878	Fam76a	protein_coding	-0.904608	2.0806	5.74426	0	1.46685	0.733061	0.463521
ENSMUSG00000044957	Pp2d1	protein_coding	-1.13076	2.0806	5.56334	0	1.31599	0.602356	0.546937
ENSMUSG00000020462	Cfap36	protein_coding	-2.03537	2.0806	4.52304	0	1.06677	0.411085	0.68101
ENSMUSG00000025404	R3hdm2	protein_coding	-2.39721	2.0806	4.56827	0	0.830586	0.245616	0.80598
ENSMUSG00000024780	Cdc37l1	protein_coding	-3.48274	2.0806	4.47781	0	0.825459	0.24326	0.807804
ENSMUSG00000015943	Bola1	protein_coding	-2.66859	2.0806	4.6135	0	0.615176	0.124317	0.901064
ENSMUSG00000035093	Secisbp2l	protein_coding	0.859378	2.03537	3.61843	0.859378	3.507	2.73593	0.00622048
ENSMUSG00000062078	Qk	protein_coding	0.587995	2.03537	3.75412	0.587995	2.83847	2.05033	0.0403324
ENSMUSG00000021559	Dapk1	protein_coding	0.587995	2.03537	4.47781	0.587995	2.74846	1.95579	0.0504893
ENSMUSG00000032440	Tgfbr2	protein_coding	0.542765	2.03537	4.65873	0.542765	2.67168	1.87904	0.0602385
ENSMUSG00000044645	Gm7334	protein_coding	0.407074	2.03537	4.52304	0.407074	2.48017	1.68229	0.0925131
ENSMUSG00000040212	Emp3	protein_coding	0.226152	2.03537	4.02551	0.226152	2.25397	1.45455	0.145794
ENSMUSG00000040296	Ddx58	protein_coding	-0.135691	2.03537	6.6941	0	1.89208	1.11259	0.265884
ENSMUSG00000069114	Zbtb10	protein_coding	-0.271382	2.03537	7.10117	0	1.80509	1.03419	0.301046
ENSMUSG00000061119	Prcp	protein_coding	-0.271382	2.03537	5.51811	0	1.77531	1.0074	0.313741
ENSMUSG00000041235	Chd7	protein_coding	-0.407074	2.03537	5.97041	0	1.65915	0.897009	0.369714
ENSMUSG00000035495	Tstd2	protein_coding	-0.768917	2.03537	4.65873	0	1.63379	0.874199	0.38201
ENSMUSG00000018750	Zbtb4	protein_coding	-0.587995	2.03537	6.28703	0	1.60795	0.855265	0.392404
ENSMUSG00000015501	Hivep2	protein_coding	-0.633226	2.03537	4.29689	0	1.59519	0.843614	0.398885
ENSMUSG00000022761	Lztr1	protein_coding	-1.67352	2.03537	6.15133	0	1.23701	0.538891	0.589962
ENSMUSG00000020183	Cpm	protein_coding	0.768917	1.99014	3.75412	0.768917	3.36045	2.59028	0.00958982
ENSMUSG00000074280	Gm6166	pseudogene	0.542765	1.99014	5.15627	0.542765	2.73244	1.93945	0.0524462
ENSMUSG00000000594	Gm2a	protein_coding	0.316613	1.99014	4.88488	0.316613	2.37253	1.57006	0.1164
ENSMUSG00000032062	2310030G06Rik	protein_coding	-0.542765	1.99014	4.20643	0	1.56738	0.819803	0.412328
ENSMUSG00000048027	Rgmb	protein_coding	-0.678456	1.99014	4.07074	0	1.43512	0.705434	0.48054
ENSMUSG00000045886	Gm9803	protein_coding	-0.859378	1.99014	4.93011	0	1.35956	0.63855	0.523115
ENSMUSG00000061724	Gm2423	processed_pseudogene	-1.76399	1.99014	5.60857	0	1.15523	0.475885	0.634156
ENSMUSG00000031095	Cul4b	protein_coding	-1.71876	1.99014	5.24673	0	1.08098	0.419348	0.674962
ENSMUSG00000003345	Csnk1g2	protein_coding	-2.26152	1.99014	4.20643	0	0.814779	0.237286	0.812435
ENSMUSG00000069601	Ank3	protein_coding	0.814147	1.94491	3.98028	0.814147	3.43462	2.66366	0.00772952
ENSMUSG00000023034	Nr4a1	protein_coding	0.814147	1.94491	4.07074	0.814147	3.43027	2.65995	0.00781522
ENSMUSG00000034613	Ppm1h	protein_coding	0.497534	1.94491	3.70889	0.497534	2.69484	1.90275	0.0570738
ENSMUSG00000021109	Hif1a	protein_coding	0.316613	1.94491	4.11597	0.316613	2.40815	1.60653	0.108158
ENSMUSG00000019256	Ahr	protein_coding	0	1.94491	6.60364	0	1.98634	1.20135	0.229616
ENSMUSG00000028937	Acot7	protein_coding	-0.0452304	1.94491	5.02057	0	1.93611	1.15339	0.248749
ENSMUSG00000026426	Arl8a	protein_coding	-0.995069	1.94491	5.33719	0	1.27376	0.567631	0.570285
ENSMUSG00000094377	Gm24407	snRNA	-1.58306	1.94491	4.25166	0	1.04102	0.394975	0.692862
ENSMUSG00000038384	Setd1b	protein_coding	0.316613	1.89968	5.38242	0.316613	2.38139	1.578	0.114566
ENSMUSG00000040029	Ipo8	protein_coding	-0.361843	1.89968	6.37749	0	1.6893	0.926769	0.354047
ENSMUSG00000038212	Mfsd14b	protein_coding	-0.452304	1.89968	5.51811	0	1.64874	0.886776	0.3752
ENSMUSG00000037075	Rnf139	protein_coding	-0.452304	1.89968	4.25166	0	1.59786	0.845678	0.397733
ENSMUSG00000007613	Tgfbr1	protein_coding	-0.452304	1.89968	4.34212	0	1.58314	0.834111	0.404218
ENSMUSG00000024579	Pcyox1l	protein_coding	-1.71876	1.89968	5.02057	0	0.967656	0.342038	0.732322
ENSMUSG00000025572	Tmc6	protein_coding	-3.5732	1.89968	5.47288	0	0.728253	0.187852	0.850993
ENSMUSG00000021795	Sftpd	protein_coding	0.768917	1.85445	2.84952	0.768917	3.60278	2.83929	0.00452147
ENSMUSG00000052748	Swt1	protein_coding	0.497534	1.85445	5.11104	0.497534	2.71685	1.92388	0.0543693
ENSMUSG00000018209	Stk4	protein_coding	0.135691	1.85445	3.70889	0.135691	2.16509	1.36799	0.171315
ENSMUSG00000034560	A230046K03Rik	protein_coding	0.135691	1.85445	3.79935	0.135691	2.16234	1.36609	0.171912
ENSMUSG00000029638	Glcci1	protein_coding	0.0904608	1.85445	7.01071	0.0904608	2.054	1.26401	0.206227
ENSMUSG00000032560	Dnajc13	protein_coding	-0.180922	1.85445	4.25166	0	1.8419	1.06614	0.286359
ENSMUSG00000007411	Mark3	protein_coding	-0.180922	1.85445	5.11104	0	1.83478	1.05924	0.289489
ENSMUSG00000092203	1110038B12Rik	processed_transcript	-0.587995	1.85445	4.43258	0	1.4895	0.753309	0.451264
ENSMUSG00000086320	Gm12840	lincRNA	-1.67352	1.85445	5.78949	0	1.25145	0.549679	0.58254
ENSMUSG00000020064	Herc4	protein_coding	-1.13076	1.85445	4.20643	0	1.18124	0.496353	0.619645
ENSMUSG00000054920	Klhl5	protein_coding	-2.75905	1.85445	5.74426	0	1.14452	0.468087	0.639723
ENSMUSG00000057691	Zfp746	protein_coding	-3.43751	1.85445	4.6135	0	1.00422	0.367883	0.712961
ENSMUSG00000046329	Slc25a23	protein_coding	-2.66859	1.85445	5.60857	0	0.863237	0.271164	0.786265
ENSMUSG00000052296	Ppp6r1	protein_coding	-2.62336	1.85445	5.15627	0	0.772491	0.212294	0.831878
ENSMUSG00000032359	Ctsh	protein_coding	0.859378	1.80922	2.75905	0.859378	3.91271	3.16018	0.00157672
ENSMUSG00000064360	mt-Nd3	protein_coding	0.723686	1.80922	4.1612	0.723686	3.3918	2.61979	0.00879829
ENSMUSG00000024140	Epas1	protein_coding	0.587995	1.80922	4.79442	0.587995	3.01617	2.23262	0.025574
ENSMUSG00000028173	Wls	protein_coding	0.542765	1.80922	2.93998	0.542765	2.84649	2.05732	0.0396556
ENSMUSG00000062232	Rapgef2	protein_coding	0.497534	1.80922	3.66366	0.497534	2.75568	1.96196	0.0497669
ENSMUSG00000021775	Nr1d2	protein_coding	0.226152	1.80922	3.79935	0.226152	2.2857	1.48441	0.1377
ENSMUSG00000045730	Adrb2	protein_coding	0.226152	1.80922	5.74426	0.226152	2.24375	1.44576	0.148244
ENSMUSG00000021690	Jmy	protein_coding	0.180922	1.80922	6.92025	0.180922	2.14676	1.35279	0.176124
ENSMUSG00000050912	Tmem123	protein_coding	0.0904608	1.80922	5.60857	0.0904608	2.09511	1.3039	0.192268
ENSMUSG00000029461	Fam168a	protein_coding	-0.0904608	1.80922	4.52304	0	1.89788	1.11709	0.263956
ENSMUSG00000044447	Dock5	protein_coding	-0.226152	1.80922	6.33226	0	1.80015	1.03101	0.302536
ENSMUSG00000037795	N4bp2	protein_coding	-0.271382	1.80922	6.37749	0	1.74966	0.982509	0.325849
ENSMUSG00000019948	Actr6	protein_coding	-0.271382	1.80922	4.34212	0	1.72169	0.956368	0.338886
ENSMUSG00000055053	Nfic	protein_coding	-0.361843	1.80922	5.24673	0	1.68112	0.920136	0.357502
ENSMUSG00000003200	Sh3gl1	protein_coding	-0.497534	1.80922	4.25166	0	1.56778	0.820177	0.412115
ENSMUSG00000034248	Slc25a37	protein_coding	-0.904608	1.80922	6.33226	0	1.38281	0.657853	0.510632
ENSMUSG00000035329	Fbxo33	protein_coding	-3.61843	1.80922	4.52304	0	1.18949	0.50322	0.61481
ENSMUSG00000010755	Cars	protein_coding	-1.94491	1.80922	5.74426	0	1.18031	0.495553	0.62021
ENSMUSG00000033186	Mzt1	protein_coding	-1.76399	1.80922	5.11104	0	1.15891	0.479011	0.631931
ENSMUSG00000037364	Srrt	protein_coding	-1.4926	1.80922	4.20643	0	1.08237	0.420024	0.674468
ENSMUSG00000045294	Insig1	protein_coding	0.723686	1.76399	3.1209	0.723686	3.45307	2.68279	0.00730112
ENSMUSG00000034349	Smc4	protein_coding	0.542765	1.76399	4.6135	0.542765	2.89868	2.11193	0.0346926
ENSMUSG00000031660	Brd7	protein_coding	0.361843	1.76399	4.56827	0.361843	2.53971	1.74279	0.081371
ENSMUSG00000024277	Mapre2	protein_coding	-0.180922	1.76399	4.47781	0	1.80248	1.03201	0.302066
ENSMUSG00000009207	Lnp	protein_coding	-0.316613	1.76399	5.92518	0	1.72548	0.96054	0.336784
ENSMUSG00000024487	Yipf5	protein_coding	-0.361843	1.76399	5.02057	0	1.64915	0.887157	0.374995
ENSMUSG00000052713	Zfp608	protein_coding	-0.497534	1.76399	6.64887	0	1.60917	0.856427	0.391762
ENSMUSG00000062480	Acat3	protein_coding	-1.0403	1.76399	5.83472	0	1.27316	0.567398	0.570444
ENSMUSG00000029413	Naaa	protein_coding	-1.0403	1.76399	4.34212	0	1.22781	0.531859	0.594824
ENSMUSG00000075268	Gm10819	processed_pseudogene	-2.35198	1.76399	3.88981	0	0.983259	0.352632	0.724364
ENSMUSG00000050490	Gm8394	protein_coding	-1.89968	1.76399	4.43258	0	0.965993	0.340984	0.733116
ENSMUSG00000057541	Pus7	protein_coding	-2.93998	1.76399	6.01564	0	0.760114	0.205819	0.836932
ENSMUSG00000014633	Cmc2	protein_coding	-4.20643	1.76399	3.75412	0	0.0172393	0	1
ENSMUSG00000037685	Atp8a1	protein_coding	0.678456	1.71876	2.84952	0.678456	3.36709	2.5966	0.00941504
ENSMUSG00000096006	Gm21596	processed_pseudogene	0.633226	1.71876	3.52797	0.633226	3.06995	2.28957	0.0220461
ENSMUSG00000028161	Ppp3ca	protein_coding	0.542765	1.71876	3.93504	0.542765	2.91645	2.12934	0.0332259
ENSMUSG00000026103	Gls	protein_coding	0.452304	1.71876	3.84458	0.452304	2.63426	1.84106	0.0656129
ENSMUSG00000026888	Grb14	protein_coding	0.226152	1.71876	3.70889	0.226152	2.305	1.5036	0.132683
ENSMUSG00000042364	Snx18	protein_coding	0.180922	1.71876	4.43258	0.180922	2.23065	1.43303	0.151848
ENSMUSG00000001918	Slc1a5	protein_coding	0.180922	1.71876	6.51318	0.180922	2.22015	1.42441	0.154328
ENSMUSG00000031197	Vbp1	protein_coding	0.180922	1.71876	3.88981	0.180922	2.19981	1.40151	0.161061
ENSMUSG00000076431	Sox4	protein_coding	0.135691	1.71876	5.74426	0.135691	2.12372	1.33103	0.183179
ENSMUSG00000024150	Mcfd2	protein_coding	-0.0452304	1.71876	5.02057	0	1.94131	1.15834	0.246724
ENSMUSG00000024664	Fads3	protein_coding	-0.0452304	1.71876	3.48274	0	1.92626	1.1455	0.252001
ENSMUSG00000026411	Tmem9	protein_coding	-0.904608	1.71876	4.1612	0	1.4541	0.722636	0.469903
ENSMUSG00000028049	Scamp3	protein_coding	-0.768917	1.71876	5.2015	0	1.35566	0.634886	0.525503
ENSMUSG00000039220	Ppp1r10	protein_coding	0.452304	1.67352	3.30182	0.452304	2.78624	1.9948	0.0460651
ENSMUSG00000019970	Sgk1	protein_coding	0.226152	1.67352	4.29689	0.226152	2.31508	1.51237	0.130441
ENSMUSG00000030760	Acer3	protein_coding	0.226152	1.67352	5.56334	0.226152	2.24441	1.44609	0.148152
ENSMUSG00000024236	Svil	protein_coding	0.180922	1.67352	5.42765	0.180922	2.22225	1.42585	0.153912
ENSMUSG00000021190	Lgmn	protein_coding	0.135691	1.67352	4.1612	0.135691	2.1411	1.34758	0.177792
ENSMUSG00000048234	Rnf149	protein_coding	0.0452304	1.67352	4.1612	0.0452304	2.01822	1.23139	0.218177
ENSMUSG00000035614	Fam179b	protein_coding	0.0452304	1.67352	6.51318	0.0452304	2.01442	1.22873	0.219172
ENSMUSG00000031012	Cask	protein_coding	-0.0452304	1.67352	6.46795	0	1.92298	1.14198	0.253461
ENSMUSG00000022013	Dnajc15	protein_coding	-0.226152	1.67352	3.70889	0	1.74953	0.982509	0.325849
ENSMUSG00000032009	Sesn3	protein_coding	-0.316613	1.67352	7.10117	0	1.72959	0.964157	0.334967
ENSMUSG00000110088	RP23-322E23.4	TEC	-0.271382	1.67352	4.52304	0	1.70939	0.946357	0.343967
ENSMUSG00000023104	Rfc2	protein_coding	-0.361843	1.67352	5.87995	0	1.70159	0.93927	0.347592
ENSMUSG00000023074	Mospd1	protein_coding	-0.407074	1.67352	4.07074	0	1.64387	0.882595	0.377455
ENSMUSG00000025612	Bach1	protein_coding	-0.361843	1.67352	4.52304	0	1.62143	0.865133	0.386966
ENSMUSG00000022744	Cldnd1	protein_coding	-0.633226	1.67352	6.1061	0	1.47619	0.741483	0.458401
ENSMUSG00000026455	Klhl12	protein_coding	-2.0806	1.67352	5.47288	0	1.07137	0.41295	0.679643
ENSMUSG00000029478	Ncor2	protein_coding	-3.34705	1.67352	4.56827	0	0.602301	0.119812	0.904632
ENSMUSG00000016534	Lamp2	protein_coding	0.497534	1.62829	2.80428	0.497534	2.85947	2.07128	0.0383325
ENSMUSG00000029186	Pi4k2b	protein_coding	0.361843	1.62829	3.61843	0.361843	2.54598	1.74877	0.0803316
ENSMUSG00000032548	Slco2a1	protein_coding	0.361843	1.62829	3.34705	0.361843	2.52058	1.72538	0.0844584
ENSMUSG00000024054	Smchd1	protein_coding	0.271382	1.62829	5.78949	0.271382	2.40994	1.60792	0.107852
ENSMUSG00000100405	Gm28911	processed_pseudogene	0.0904608	1.62829	4.11597	0.0904608	2.19195	1.39477	0.163086
ENSMUSG00000096349	Gm22513	snRNA	0.0452304	1.62829	4.1612	0.0452304	2.07304	1.28263	0.19962
ENSMUSG00000043940	Wdfy3	protein_coding	0.0452304	1.62829	6.87502	0.0452304	2.02918	1.24102	0.214599
ENSMUSG00000024400	Wdr33	protein_coding	-0.0904608	1.62829	4.34212	0	1.90689	1.12501	0.260586
ENSMUSG00000086141	9030622O22Rik	lincRNA	-0.226152	1.62829	3.61843	0	1.74416	0.976502	0.328816
ENSMUSG00000085148	Mir22hg	processed_transcript	-0.316613	1.62829	6.46795	0	1.73639	0.969957	0.332068
ENSMUSG00000060149	BC002059	lincRNA	-3.98028	1.62829	3.93504	0	1.22744	0.531794	0.594869
ENSMUSG00000078676	Casc3	protein_coding	-1.17599	1.62829	5.74426	0	1.18603	0.500537	0.616697
ENSMUSG00000032577	Mapkapk3	protein_coding	-1.94491	1.62829	5.97041	0	1.08854	0.424463	0.671228
ENSMUSG00000025486	Sirt3	protein_coding	-2.57813	1.62829	5.29196	0	0.915577	0.30527	0.76016
ENSMUSG00000005378	Wbscr22	protein_coding	-4.1612	1.62829	4.79442	0	0.421023	0.0351139	0.971989
ENSMUSG00000002968	Med25	protein_coding	-4.20643	1.62829	4.25166	0	0.108877	0	1
ENSMUSG00000022114	Spry2	protein_coding	0.633226	1.58306	2.84952	0.633226	3.30932	2.53728	0.0111719
ENSMUSG00000029632	Ndufa4	protein_coding	0.497534	1.58306	2.66859	0.497534	2.80399	2.01317	0.0440967
ENSMUSG00000104222	Gm7292	TEC	0.452304	1.58306	2.75905	0.452304	2.79802	2.00793	0.0446503
ENSMUSG00000005198	Polr2a	protein_coding	0.407074	1.58306	3.34705	0.407074	2.66082	1.86846	0.0616976
ENSMUSG00000039197	Adk	protein_coding	0.361843	1.58306	5.02057	0.361843	2.5626	1.76577	0.077434
ENSMUSG00000027808	Serp1	protein_coding	0.316613	1.58306	3.66366	0.316613	2.50717	1.71242	0.0868184
ENSMUSG00000001105	Ift20	protein_coding	0.271382	1.58306	4.34212	0.271382	2.35957	1.5583	0.119162
ENSMUSG00000018481	Appbp2	protein_coding	0.135691	1.58306	3.84458	0.135691	2.16325	1.36664	0.171738
ENSMUSG00000108621	Gm37494	lincRNA	0	1.58306	4.34212	0	1.96161	1.17824	0.238702
ENSMUSG00000037253	Mex3c	protein_coding	-0.316613	1.58306	3.88981	0	1.67188	0.911122	0.362231
ENSMUSG00000022253	Nadk2	protein_coding	-0.407074	1.58306	6.15133	0	1.63067	0.872084	0.383163
ENSMUSG00000028646	Rragc	protein_coding	-0.587995	1.58306	5.74426	0	1.54421	0.797713	0.425037
ENSMUSG00000022822	Abcc5	protein_coding	-0.633226	1.58306	3.98028	0	1.39851	0.673107	0.500879
ENSMUSG00000067235	H2-Q10	protein_coding	-1.0403	1.58306	5.60857	0	1.29255	0.584841	0.558655
ENSMUSG00000032409	Atr	protein_coding	-1.4926	1.58306	6.19656	0	1.22146	0.527496	0.597849
ENSMUSG00000019817	Plagl1	protein_coding	-1.22122	1.58306	3.30182	0	1.0551	0.403453	0.686615
ENSMUSG00000006494	Pdk1	protein_coding	-1.80922	1.58306	4.93011	0	0.890665	0.288989	0.772589
ENSMUSG00000047824	Pygo2	protein_coding	-2.26152	1.58306	4.74919	0	0.755598	0.202027	0.839896
ENSMUSG00000058997	Vwa8	protein_coding	-2.48767	1.58306	5.33719	0	0.733787	0.189658	0.849577
ENSMUSG00000020738	Sumo2	protein_coding	0.542765	1.53783	2.57813	0.542765	3.22325	2.44885	0.0143313
ENSMUSG00000005087	Cd44	protein_coding	0.542765	1.53783	2.5329	0.542765	3.15427	2.37915	0.0173525
ENSMUSG00000101970	1810026B05Rik	processed_transcript	0.135691	1.53783	3.88981	0.135691	2.19585	1.39797	0.162121
ENSMUSG00000019726	Lyst	protein_coding	0.0452304	1.53783	4.56827	0.0452304	2.0451	1.25503	0.209469
ENSMUSG00000031939	Taf1d	protein_coding	0.0452304	1.53783	3.52797	0.0452304	2.02437	1.23677	0.216171
ENSMUSG00000036093	Arl5a	protein_coding	0	1.53783	3.98028	0	2.01474	1.22877	0.219159
ENSMUSG00000026753	Ppp6c	protein_coding	-0.0452304	1.53783	3.1209	0	1.94968	1.16701	0.243208
ENSMUSG00000024423	Impact	protein_coding	-0.0452304	1.53783	3.48274	0	1.90325	1.12125	0.262181
ENSMUSG00000028007	Snx7	protein_coding	-0.0904608	1.53783	4.38735	0	1.88311	1.10447	0.269389
ENSMUSG00000026113	Inpp4a	protein_coding	-0.271382	1.53783	3.52797	0	1.71749	0.952204	0.340993
ENSMUSG00000022517	Mgrn1	protein_coding	-0.407074	1.53783	6.55841	0	1.62375	0.867279	0.385789
ENSMUSG00000042446	Zmym4	protein_coding	-0.542765	1.53783	5.92518	0	1.54986	0.802499	0.422264
ENSMUSG00000019878	Hsf2	protein_coding	-0.814147	1.53783	6.37749	0	1.42645	0.697901	0.485239
ENSMUSG00000032777	Gtf3c1	protein_coding	-0.723686	1.53783	5.47288	0	1.41422	0.685904	0.492774
ENSMUSG00000056666	Retsat	protein_coding	-0.678456	1.53783	6.28703	0	1.41362	0.685211	0.493211
ENSMUSG00000034616	Ssh3	protein_coding	-1.31168	1.53783	4.20643	0	1.06094	0.407303	0.683786
ENSMUSG00000041530	Ago1	protein_coding	-2.30675	1.53783	4.02551	0	0.901071	0.293739	0.768957
ENSMUSG00000018474	Chd3	protein_coding	-2.48767	1.53783	5.38242	0	0.846648	0.258723	0.795849
ENSMUSG00000050428	Fbxo46	protein_coding	-2.03537	1.53783	4.6135	0	0.821322	0.241226	0.80938
ENSMUSG00000043488	Frmd8os	antisense	-3.21136	1.53783	4.07074	0	0.46468	0.0536938	0.957179
ENSMUSG00000046434	Hnrnpa1	protein_coding	0.542765	1.4926	2.35198	0.542765	3.16657	2.39067	0.0168177
ENSMUSG00000028649	Macf1	protein_coding	0.452304	1.4926	2.62336	0.452304	2.87636	2.08842	0.0367595
ENSMUSG00000038894	Irs2	protein_coding	0.361843	1.4926	3.25659	0.361843	2.6875	1.8949	0.058105
ENSMUSG00000052459	Atp6v1a	protein_coding	0.316613	1.4926	2.62336	0.316613	2.56923	1.77149	0.0764799
ENSMUSG00000101939	Gm28438	unprocessed_pseudogene	0.226152	1.4926	3.16613	0.226152	2.3531	1.55154	0.120772
ENSMUSG00000053460	Ggcx	protein_coding	0.226152	1.4926	5.29196	0.226152	2.27314	1.47226	0.14095
ENSMUSG00000033352	Map2k4	protein_coding	0.0452304	1.4926	4.11597	0.0452304	2.02774	1.24012	0.214931
ENSMUSG00000031751	Amfr	protein_coding	-0.0452304	1.4926	5.2015	0	1.92808	1.14683	0.25145
ENSMUSG00000021929	Kpna3	protein_coding	-0.135691	1.4926	4.07074	0	1.84485	1.06839	0.285343
ENSMUSG00000035311	Gnptab	protein_coding	-0.180922	1.4926	5.78949	0	1.81236	1.04074	0.297994
ENSMUSG00000021027	Ralgapa1	protein_coding	-0.180922	1.4926	4.88488	0	1.77411	1.0061	0.314367
ENSMUSG00000037720	Tmem33	protein_coding	-0.226152	1.4926	4.1612	0	1.71616	0.951123	0.341542
ENSMUSG00000032497	Lrrfip2	protein_coding	-0.271382	1.4926	4.6135	0	1.70257	0.939862	0.347289
ENSMUSG00000039191	Rbpj	protein_coding	-0.271382	1.4926	4.6135	0	1.69674	0.934131	0.350236
ENSMUSG00000025626	Phf6	protein_coding	-0.407074	1.4926	6.01564	0	1.63538	0.875402	0.381355
ENSMUSG00000003363	Pld3	protein_coding	-0.316613	1.4926	3.48274	0	1.61452	0.858974	0.390355
ENSMUSG00000030842	Lamtor1	protein_coding	-0.407074	1.4926	5.29196	0	1.59291	0.84209	0.399738
ENSMUSG00000015087	Rabl6	protein_coding	-0.678456	1.4926	6.33226	0	1.45493	0.723039	0.469656
ENSMUSG00000024098	Twsg1	protein_coding	-0.949838	1.4926	4.65873	0	1.38813	0.663373	0.507091
ENSMUSG00000107023	Gm42715	protein_coding	-0.949838	1.4926	5.6538	0	1.31385	0.600434	0.548217
ENSMUSG00000026097	Ormdl1	protein_coding	-1.0403	1.4926	6.19656	0	1.31103	0.598442	0.549545
ENSMUSG00000033257	Ttll4	protein_coding	-1.0403	1.4926	5.0658	0	1.20462	0.514653	0.606795
ENSMUSG00000063802	Hspbp1	protein_coding	-1.22122	1.4926	4.70396	0	1.15349	0.474584	0.635084
ENSMUSG00000040969	Arhgef38	protein_coding	-1.58306	1.4926	4.79442	0	1.01763	0.37795	0.705468
ENSMUSG00000025225	Nfkb2	protein_coding	-1.4926	1.4926	4.07074	0	1.00121	0.365786	0.714524
ENSMUSG00000040711	Sh3pxd2b	protein_coding	-1.80922	1.4926	4.25166	0	0.977596	0.348548	0.727428
ENSMUSG00000001415	Smg5	protein_coding	-2.21629	1.4926	4.83965	0	0.845239	0.257317	0.796934
ENSMUSG00000039849	Pcif1	protein_coding	-3.75412	1.4926	4.6135	0	0.767764	0.209534	0.834032
[truncated: 11,027 more rows]

## Sheet: C1 vs C3
EnsemblGeneID	AssociatedGeneName	Genetype	lb	mle	ub	ce	Z	cZ	adjP
ENSMUSG00000041247	Lamp3	protein_coding	4.47722	9.62602	10.1633	4.47722	7.16081	6.27617	3.47007e-10
ENSMUSG00000020057	Dram1	protein_coding	4.43244	9.31261	9.89465	4.43244	7.16081	6.27617	3.47007e-10
ENSMUSG00000056370	Sftpb	protein_coding	5.9547	9.17829	9.71556	5.9547	7.16081	6.27617	3.47007e-10
ENSMUSG00000015452	Ager	protein_coding	8.10376	8.95443	9.58124	8.10376	7.16081	6.27617	3.47007e-10
ENSMUSG00000030218	Mgp	protein_coding	6.80537	8.95443	9.76033	6.80537	7.16078	6.27617	3.47007e-10
ENSMUSG00000032554	Trf	protein_coding	3.67132	8.95443	9.80511	3.67132	5.27508	4.40179	1.07359e-05
ENSMUSG00000038642	Ctss	protein_coding	2.82065	8.59626	9.31261	2.82065	4.37213	3.47178	0.000517015
ENSMUSG00000021608	Lpcat1	protein_coding	6.89491	8.55148	9.13352	6.89491	7.16081	6.27617	3.47007e-10
ENSMUSG00000090509	Sfta2	protein_coding	4.0295	8.50671	8.99921	4.0295	6.9325	6.08764	1.1459e-09
ENSMUSG00000025746	Il6	protein_coding	2.86542	8.50671	9.80511	2.86542	3.12517	2.18912	0.0285883
ENSMUSG00000020077	Srgn	protein_coding	6.58151	8.41717	9.4917	6.58151	7.08399	6.23738	4.44973e-10
ENSMUSG00000040747	Cd53	protein_coding	3.26837	8.3724	9.40216	3.26837	4.68995	3.80596	0.000141257
ENSMUSG00000032640	Chsy1	protein_coding	7.16355	8.32762	9.04398	7.16355	6.76471	5.91365	3.34599e-09
ENSMUSG00000022018	Rgcc	protein_coding	5.82038	8.28285	8.90966	5.82038	7.15244	6.27617	3.47007e-10
ENSMUSG00000031375	Bgn	protein_coding	6.89491	8.19331	8.95443	6.89491	7.15596	6.27617	3.47007e-10
ENSMUSG00000020183	Cpm	protein_coding	5.73084	8.10376	8.82012	5.73084	7.14422	6.2755	3.48514e-10
ENSMUSG00000029309	Sparcl1	protein_coding	5.82038	8.10376	8.95443	5.82038	6.87352	6.02417	1.69984e-09
ENSMUSG00000022816	Fstl1	protein_coding	0.850671	7.96945	9.04398	0.850671	2.34705	1.40837	0.159023
ENSMUSG00000022661	Cd200	protein_coding	6.85014	7.8799	8.59626	6.85014	7.15847	6.27617	3.47007e-10
ENSMUSG00000011256	Adam19	protein_coding	6.62628	7.83513	8.55148	6.62628	7.10288	6.24267	4.30159e-10
ENSMUSG00000054619	Mettl7a1	protein_coding	2.64156	7.83513	8.41717	2.64156	5.36131	4.49404	6.98833e-06
ENSMUSG00000049001	Ndnf	protein_coding	2.55201	7.83513	8.55148	2.55201	4.22262	3.32908	0.000871319
ENSMUSG00000031659	Adcy7	protein_coding	6.67105	7.79036	8.55148	6.67105	7.14352	6.2755	3.48514e-10
ENSMUSG00000055653	Gpc3	protein_coding	4.92494	7.74559	8.50671	4.92494	6.21268	5.31031	1.09439e-07
ENSMUSG00000097451	Rian	processed_transcript	6.13379	7.70081	8.6858	6.13379	6.14508	5.24047	1.60164e-07
ENSMUSG00000054986	Sec14l3	protein_coding	6.49196	7.65604	8.73057	6.49196	6.81128	5.96339	2.47065e-09
ENSMUSG00000028341	Nr4a3	protein_coding	1.1193	7.65604	8.50671	1.1193	3.275	2.34429	0.0190632
ENSMUSG00000021268	Meg3	lincRNA	5.90993	7.61127	8.46194	5.90993	5.80411	4.9192	8.68979e-07
ENSMUSG00000026874	Hc	protein_coding	5.59652	7.61127	8.64103	5.59652	5.4651	4.59611	4.30449e-06
ENSMUSG00000024140	Epas1	protein_coding	1.6118	7.61127	8.3724	1.6118	4.21806	3.32499	0.000884228
ENSMUSG00000032244	Fem1b	protein_coding	1.6118	7.61127	8.28285	1.6118	3.80289	2.8935	0.00380978
ENSMUSG00000049690	Nckap5	protein_coding	1.56703	7.61127	8.19331	1.56703	3.75514	2.84492	0.00444231
ENSMUSG00000028024	Enpep	protein_coding	6.44719	7.5665	8.28285	6.44719	7.07565	6.23325	4.56857e-10
ENSMUSG00000022964	Tmem50b	protein_coding	4.74585	7.5665	8.28285	4.74585	6.08154	5.17763	2.24719e-07
ENSMUSG00000022836	Mylk	protein_coding	2.19384	7.5665	8.32762	2.19384	4.97357	4.09406	4.23876e-05
ENSMUSG00000041390	Mdfic	protein_coding	3.35791	7.5665	8.46194	3.35791	4.35745	3.45974	0.000540707
ENSMUSG00000026094	Stk17b	protein_coding	2.19384	7.52172	8.3724	2.19384	4.28645	3.3897	0.000699684
ENSMUSG00000032202	Rab27a	protein_coding	6.35765	7.47695	8.32762	6.35765	7.09583	6.23886	4.40763e-10
ENSMUSG00000020053	Igf1	protein_coding	4.83539	7.47695	9.04398	4.83539	6.47484	5.59488	2.20774e-08
ENSMUSG00000026395	Ptprc	protein_coding	5.86515	7.47695	8.77535	5.86515	5.25785	4.38542	1.15763e-05
ENSMUSG00000021835	Bmp4	protein_coding	2.4177	7.47695	8.10376	2.4177	4.69565	3.81187	0.000137922
ENSMUSG00000026728	Vim	protein_coding	5.73084	7.47695	8.3724	5.73084	4.33704	3.44301	0.000575274
ENSMUSG00000040147	Maob	protein_coding	2.68633	7.47695	8.19331	2.68633	4.00929	3.11207	0.00185783
ENSMUSG00000069515	Lyz1	protein_coding	4.70108	7.43218	8.46194	4.70108	3.87578	2.96941	0.00298368
ENSMUSG00000039115	Itga9	protein_coding	6.22333	7.38741	8.01422	6.22333	6.46096	5.582	2.37763e-08
ENSMUSG00000029661	Col1a2	protein_coding	4.92494	7.38741	8.59626	4.92494	6.28743	5.39099	7.00703e-08
ENSMUSG00000031722	Hp	protein_coding	5.68607	7.38741	8.28285	5.68607	5.37839	4.50857	6.52657e-06
ENSMUSG00000036943	Rab8b	protein_coding	1.9252	7.38741	8.23808	1.9252	3.8988	2.99311	0.00276146
ENSMUSG00000023951	Vegfa	protein_coding	2.77587	7.34264	8.01422	2.77587	5.0631	4.1845	2.858e-05
ENSMUSG00000066026	Dhrs3	protein_coding	2.55201	7.34264	8.05899	2.55201	4.73422	3.85151	0.000117391
ENSMUSG00000018927	Ccl6	protein_coding	5.19357	7.34264	8.86489	5.19357	3.29544	2.36555	0.0180035
ENSMUSG00000020120	Plek	protein_coding	3.58177	7.34264	8.3724	3.58177	3.28111	2.35061	0.0187426
ENSMUSG00000037940	Inpp4b	protein_coding	6.13379	7.25309	8.23808	6.13379	7.11037	6.24532	4.22926e-10
ENSMUSG00000044986	Tst	protein_coding	5.86515	7.25309	8.01422	5.86515	6.00551	5.09962	3.40344e-07
ENSMUSG00000047250	Ptgs1	protein_coding	4.47722	7.25309	8.05899	4.47722	5.64385	4.76901	1.8513e-06
ENSMUSG00000024664	Fads3	protein_coding	1.52225	7.25309	8.01422	1.52225	3.77877	2.86927	0.00411423
ENSMUSG00000034320	Slc26a2	protein_coding	4.38767	7.20832	7.92467	4.38767	4.71516	3.83149	0.000127368
ENSMUSG00000040653	Ppp1r14c	protein_coding	1.88043	7.20832	7.92467	1.88043	3.42145	2.50092	0.0123871
ENSMUSG00000038375	Trp53inp2	protein_coding	5.64129	7.16355	7.8799	5.64129	5.48811	4.61712	3.89109e-06
ENSMUSG00000029522	Pla2g1b	protein_coding	4.52199	7.16355	7.92467	4.52199	5.02921	4.15124	3.30683e-05
ENSMUSG00000061100	Retnla	protein_coding	5.19357	7.16355	8.05899	5.19357	4.35106	3.45526	0.000549767
ENSMUSG00000026012	Cd28	protein_coding	5.64129	7.11878	8.23808	5.64129	6.66991	5.81503	6.06216e-09
ENSMUSG00000060703	Cd302	protein_coding	3.40268	7.11878	7.92467	3.40268	4.75576	3.87548	0.000106414
ENSMUSG00000062593	Lilrb4a	protein_coding	4.20858	7.11878	8.19331	4.20858	4.28874	3.39091	0.00069662
ENSMUSG00000053702	Nebl	protein_coding	2.91019	7.11878	7.92467	2.91019	4.25044	3.35248	0.00080091
ENSMUSG00000033361	Prrg3	protein_coding	5.77561	7.074	7.92467	5.77561	6.13108	5.22823	1.71145e-07
ENSMUSG00000039672	Kcne2	protein_coding	5.4622	7.074	8.19331	5.4622	5.78885	4.90339	9.41969e-07
ENSMUSG00000042249	Adrbk2	protein_coding	3.31314	7.074	7.74559	3.31314	4.48044	3.58694	0.000334585
ENSMUSG00000023959	Clic5	protein_coding	2.82065	7.074	8.28285	2.82065	4.36698	3.46718	0.000525959
ENSMUSG00000072115	Ang	protein_coding	2.10429	7.074	7.83513	2.10429	3.97003	3.07318	0.0021179
ENSMUSG00000040564	Apoc1	protein_coding	2.46247	7.074	7.79036	2.46247	3.71991	2.80567	0.00502123
ENSMUSG00000064294	Aox3	protein_coding	1.29839	7.074	7.65604	1.29839	3.08926	2.14743	0.031759
ENSMUSG00000030351	Tspan11	protein_coding	5.64129	7.02923	7.74559	5.64129	6.28235	5.38808	7.12131e-08
ENSMUSG00000036256	Igfbp7	protein_coding	2.46247	7.02923	7.74559	2.46247	4.66885	3.7853	0.000153522
ENSMUSG00000033595	Lgi3	protein_coding	3.40268	7.02923	7.74559	3.40268	4.23619	3.3404	0.000836564
ENSMUSG00000024059	Clip4	protein_coding	3.17882	7.02923	7.79036	3.17882	4.1992	3.31001	0.000932916
ENSMUSG00000040693	Slco4c1	protein_coding	2.59679	7.02923	8.05899	2.59679	4.10054	3.20963	0.00132907
ENSMUSG00000035385	Ccl2	protein_coding	2.59679	7.02923	8.99921	2.59679	2.81764	1.87046	0.0614194
ENSMUSG00000048120	Entpd1	protein_coding	5.59652	6.98446	7.74559	5.59652	5.97917	5.07401	3.89523e-07
ENSMUSG00000023927	Satb1	protein_coding	4.74585	6.98446	8.19331	4.74585	5.58384	4.70882	2.49153e-06
ENSMUSG00000030309	Caprin2	protein_coding	5.23834	6.98446	8.05899	5.23834	5.11052	4.2299	2.33792e-05
ENSMUSG00000001496	Nkx2-1	protein_coding	4.79062	6.98446	7.65604	4.79062	4.49138	3.59669	0.000322291
ENSMUSG00000015396	Cd83	protein_coding	2.55201	6.98446	8.05899	2.55201	4.17742	3.2868	0.00101332
ENSMUSG00000019916	P4ha1	protein_coding	2.77587	6.98446	7.8799	2.77587	3.91334	3.00875	0.00262326
ENSMUSG00000027016	Zfp385b	protein_coding	5.4622	6.93969	7.74559	5.4622	5.69014	4.81082	1.50312e-06
ENSMUSG00000002985	Apoe	protein_coding	1.65657	6.93969	7.96945	1.65657	3.34286	2.41531	0.0157219
ENSMUSG00000031304	Il2rg	protein_coding	0.492494	6.93969	7.92467	0.492494	3.06955	2.12672	0.0334435
ENSMUSG00000018339	Gpx3	protein_coding	0.313405	6.93969	7.70081	0.313405	2.78577	1.83887	0.0659337
ENSMUSG00000003882	Il7r	protein_coding	5.59652	6.89491	7.8799	5.59652	6.85285	6.00405	1.9245e-09
ENSMUSG00000020566	Atp6v1c2	protein_coding	5.37266	6.89491	8.01422	5.37266	5.83006	4.93705	7.93139e-07
ENSMUSG00000038521	C1s1	protein_coding	3.17882	6.89491	7.65604	3.17882	5.56727	4.69593	2.65398e-06
ENSMUSG00000020532	Acaca	protein_coding	4.3429	6.89491	7.79036	4.3429	4.8702	3.99661	6.42572e-05
ENSMUSG00000045730	Adrb2	protein_coding	1.56703	6.89491	7.61127	1.56703	3.41661	2.49516	0.0125901
ENSMUSG00000022372	Sla	protein_coding	4.25336	6.85014	7.74559	4.25336	3.48508	2.56881	0.0102048
ENSMUSG00000049422	Chchd10	protein_coding	1.83566	6.85014	7.52172	1.83566	3.47728	2.55926	0.0104896
ENSMUSG00000073409	H2-Q6	protein_coding	0.447722	6.85014	7.47695	0.447722	2.38595	1.45213	0.146466
ENSMUSG00000042268	Slc26a9	protein_coding	0.313405	6.85014	7.65604	0.313405	2.25009	1.31617	0.188116
ENSMUSG00000047867	Gimap6	protein_coding	5.59652	6.80537	8.01422	5.59652	5.6203	4.74484	2.08667e-06
ENSMUSG00000027360	Hdc	protein_coding	2.86542	6.80537	7.70081	2.86542	3.76529	2.85649	0.00428348
ENSMUSG00000022097	Sftpc	protein_coding	5.73084	6.7606	7.74559	5.73084	7.16081	6.27617	3.47007e-10
ENSMUSG00000022098	Bmp1	protein_coding	2.32815	6.7606	7.52172	2.32815	4.4834	3.58883	0.000332171
ENSMUSG00000042510	AA986860	protein_coding	2.82065	6.7606	7.5665	2.82065	4.20008	3.31035	0.000931792
ENSMUSG00000048489	8430408G22Rik	protein_coding	2.23861	6.7606	7.61127	2.23861	3.5146	2.59816	0.00937244
ENSMUSG00000005360	Slc1a3	protein_coding	1.43271	6.7606	7.61127	1.43271	3.22821	2.29418	0.0217803
ENSMUSG00000022181	C6	protein_coding	4.92494	6.71583	7.52172	4.92494	5.43076	4.56162	5.07597e-06
ENSMUSG00000036585	Fgf1	protein_coding	4.07427	6.71583	7.61127	4.07427	4.04362	3.14727	0.00164804
ENSMUSG00000105933	Gm43260	sense_intronic	4.16381	6.71583	7.70081	4.16381	4.0364	3.14036	0.00168741
ENSMUSG00000024511	Rab27b	protein_coding	3.2236	6.71583	7.74559	3.2236	3.80759	2.89818	0.0037534
ENSMUSG00000027800	Tm4sf1	protein_coding	2.95496	6.71583	7.79036	2.95496	3.22629	2.29317	0.0218384
ENSMUSG00000036368	Rmdn2	protein_coding	5.19357	6.67105	7.65604	5.19357	6.72038	5.86636	4.4546e-09
ENSMUSG00000060459	Kng2	protein_coding	4.79062	6.67105	7.5665	4.79062	6.01169	5.10422	3.32161e-07
ENSMUSG00000033420	Antxr1	protein_coding	4.65631	6.67105	7.43218	4.65631	5.72775	4.84556	1.26254e-06
ENSMUSG00000003418	St8sia6	protein_coding	4.96971	6.67105	7.65604	4.96971	5.13582	4.25367	2.10296e-05
ENSMUSG00000041695	Kcnj2	protein_coding	4.65631	6.67105	7.61127	4.65631	4.95062	4.07283	4.64459e-05
ENSMUSG00000089672	Lilr4b	protein_coding	3.44746	6.67105	8.05899	3.44746	3.55165	2.6348	0.00841865
ENSMUSG00000035967	Ddx26b	protein_coding	0.582038	6.67105	7.43218	0.582038	2.38474	1.45212	0.146467
ENSMUSG00000035805	Mlc1	protein_coding	4.61153	6.62628	7.38741	4.61153	4.88029	4.00554	6.18757e-05
ENSMUSG00000022799	Arhgap31	protein_coding	3.537	6.62628	7.38741	3.537	4.13842	3.2473	0.00116504
ENSMUSG00000031239	Itm2a	protein_coding	2.46247	6.62628	7.70081	2.46247	3.2836	2.35175	0.0186855
ENSMUSG00000037754	Ppp1r16b	protein_coding	5.19357	6.58151	7.96945	5.19357	4.34339	3.44833	0.000564054
ENSMUSG00000024747	Aldh1a7	protein_coding	4.96971	6.58151	7.61127	4.96971	3.8438	2.93755	0.00330818
ENSMUSG00000053641	Dennd4a	protein_coding	3.62655	6.58151	7.83513	3.62655	3.78892	2.88026	0.00397351
ENSMUSG00000097417	Gm26669	lincRNA	0.761127	6.58151	7.65604	0.761127	2.48046	1.54608	0.122085
ENSMUSG00000053475	Tnfaip6	protein_coding	2.59679	6.53674	7.74559	2.59679	4.55045	3.6577	0.000254493
ENSMUSG00000031647	Mfap3l	protein_coding	4.29813	6.53674	7.43218	4.29813	4.23069	3.33517	0.000852471
ENSMUSG00000017007	Rbpjl	protein_coding	3.35791	6.53674	7.34264	3.35791	3.90872	3.00427	0.00266222
ENSMUSG00000026358	Rgs1	protein_coding	3.49223	6.53674	8.59626	3.49223	3.77186	2.86148	0.00421662
ENSMUSG00000048332	Lhfp	protein_coding	1.56703	6.53674	7.43218	1.56703	3.59425	2.67673	0.00743447
ENSMUSG00000027805	Pfn2	protein_coding	0.40295	6.53674	7.38741	0.40295	2.27864	1.34248	0.179441
ENSMUSG00000009628	Tex15	protein_coding	4.96971	6.49196	7.5665	4.96971	5.81613	4.92917	8.25789e-07
ENSMUSG00000027070	Lrp2	protein_coding	3.44746	6.49196	7.38741	3.44746	3.85415	2.94802	0.00319818
ENSMUSG00000051615	Rap2a	protein_coding	4.29813	6.49196	7.47695	4.29813	3.58826	2.67252	0.0075283
ENSMUSG00000030340	Scnn1a	protein_coding	1.70134	6.49196	7.20832	1.70134	2.95136	2.00658	0.0447946
ENSMUSG00000027398	Il1b	protein_coding	1.6118	6.49196	7.61127	1.6118	2.7379	1.79352	0.0728906
ENSMUSG00000086141	9030622O22Rik	lincRNA	0.805899	6.49196	7.29786	0.805899	2.68762	1.74197	0.0815129
ENSMUSG00000001419	Mef2d	protein_coding	0.492494	6.49196	7.38741	0.492494	2.39523	1.46088	0.144048
ENSMUSG00000034810	Scn7a	protein_coding	4.79062	6.44719	7.47695	4.79062	5.80508	4.9192	8.68979e-07
ENSMUSG00000018217	Pmp22	protein_coding	4.79062	6.44719	7.61127	4.79062	5.61686	4.74251	2.11083e-06
ENSMUSG00000076928	Trac	TR_C_gene	2.82065	6.44719	7.5665	2.82065	5.56521	4.69511	2.66467e-06
ENSMUSG00000037736	Limch1	protein_coding	4.79062	6.44719	7.5665	4.79062	4.89923	4.02503	5.69682e-05
ENSMUSG00000030785	Cox6a2	protein_coding	4.56676	6.44719	7.43218	4.56676	4.69816	3.81392	0.000136779
ENSMUSG00000081640	Rplp0-ps1	processed_pseudogene	2.37293	6.44719	7.29786	2.37293	4.20137	3.31044	0.000931502
ENSMUSG00000031889	D230025D16Rik	protein_coding	2.68633	6.44719	7.47695	2.68633	3.66087	2.74372	0.00607464
ENSMUSG00000040212	Emp3	protein_coding	1.70134	6.44719	7.47695	1.70134	3.53533	2.61982	0.00879773
ENSMUSG00000030313	Dennd5b	protein_coding	2.99974	6.44719	7.34264	2.99974	3.51323	2.59746	0.00939162
ENSMUSG00000071342	Lsmem1	protein_coding	2.19384	6.44719	7.43218	2.19384	3.40679	2.48451	0.0129729
ENSMUSG00000046519	Golph3l	protein_coding	3.89518	6.44719	7.70081	3.89518	3.17702	2.24325	0.0248808
ENSMUSG00000079465	Col4a3	protein_coding	1.1193	6.44719	7.43218	1.1193	2.86764	1.92358	0.0544066
ENSMUSG00000030921	Trim30a	protein_coding	1.52225	6.44719	7.43218	1.52225	2.62268	1.68272	0.0924292
ENSMUSG00000105361	AY036118	lincRNA	-0.716355	6.44719	7.25309	0	1.27887	0.475772	0.634237
ENSMUSG00000062939	Stat4	protein_coding	4.47722	6.40242	7.38741	4.47722	5.64963	4.77231	1.82129e-06
ENSMUSG00000026158	Ogfrl1	protein_coding	4.16381	6.40242	7.34264	4.16381	4.92978	4.05402	5.03449e-05
ENSMUSG00000058064	Gm10036	protein_coding	4.79062	6.40242	7.20832	4.79062	4.71736	3.83314	0.000126516
ENSMUSG00000001506	Col1a1	protein_coding	3.85041	6.40242	7.5665	3.85041	3.83608	2.92909	0.00339957
ENSMUSG00000019852	Arfgef3	protein_coding	4.25336	6.40242	7.43218	4.25336	3.65498	2.73933	0.00615647
ENSMUSG00000098188	Sowahc	protein_coding	2.28338	6.40242	7.25309	2.28338	3.20404	2.27019	0.0231962
ENSMUSG00000026674	Ddr2	protein_coding	4.47722	6.35765	7.25309	4.47722	5.20081	4.32571	1.5204e-05
ENSMUSG00000027339	Rassf2	protein_coding	4.25336	6.35765	7.25309	4.25336	4.94177	4.06727	4.75681e-05
ENSMUSG00000074259	Gramd2	protein_coding	3.89518	6.35765	7.52172	3.89518	4.85682	3.98369	6.78535e-05
ENSMUSG00000058715	Fcer1g	protein_coding	3.98472	6.35765	7.43218	3.98472	3.40692	2.48451	0.0129729
ENSMUSG00000040940	Arhgef1	protein_coding	1.6118	6.35765	7.11878	1.6118	2.99032	2.04614	0.0407422
ENSMUSG00000015340	Cybb	protein_coding	1.88043	6.35765	7.47695	1.88043	2.97587	2.0321	0.042144
ENSMUSG00000027340	Slc23a2	protein_coding	1.47748	6.35765	7.16355	1.47748	2.89277	1.94602	0.0516527
ENSMUSG00000091028	Gm10722	protein_coding	2.14906	6.35765	7.20832	2.14906	2.79016	1.84324	0.0652941
ENSMUSG00000037440	Vnn1	protein_coding	1.16408	6.35765	7.29786	1.16408	2.63663	1.69638	0.0898131
ENSMUSG00000021125	Arg2	protein_coding	0.537266	6.35765	7.29786	0.537266	2.39049	1.45685	0.145158
ENSMUSG00000019917	2018-09-10	protein_coding	0.447722	6.35765	7.02923	0.447722	2.16234	1.23316	0.217515
ENSMUSG00000024007	Ppil1	protein_coding	0.0447722	6.35765	7.16355	0.0447722	1.99874	1.06698	0.285981
ENSMUSG00000056144	Trim34a	protein_coding	-0.537266	6.35765	7.47695	0	1.74099	0.834828	0.403814
ENSMUSG00000022144	Gdnf	protein_coding	4.20858	6.31288	7.25309	4.20858	6.11736	5.21659	1.8225e-07
ENSMUSG00000024867	Pip5k1b	protein_coding	4.0295	6.31288	7.29786	4.0295	4.50522	3.60994	0.000306262
ENSMUSG00000034467	Dynlrb2	protein_coding	4.65631	6.31288	7.47695	4.65631	4.35946	3.46136	0.000537453
ENSMUSG00000081434	Gm14165	processed_pseudogene	4.29813	6.31288	7.11878	4.29813	4.22378	3.32975	0.000869249
ENSMUSG00000031387	Renbp	protein_coding	4.11904	6.31288	7.25309	4.11904	4.16149	3.27077	0.00107255
ENSMUSG00000016194	Hsd11b1	protein_coding	0.313405	6.31288	7.34264	0.313405	3.93176	3.03123	0.00243558
ENSMUSG00000038369	Ncoa6	protein_coding	1.25362	6.31288	7.11878	1.25362	3.0192	2.07544	0.037946
ENSMUSG00000048960	Prex2	protein_coding	0.492494	6.31288	7.074	0.492494	2.57449	1.63448	0.102157
ENSMUSG00000030844	Rgs10	protein_coding	4.88017	6.2681	7.38741	4.88017	6.12973	5.22823	1.71145e-07
ENSMUSG00000078607	1810010H24Rik	protein_coding	4.38767	6.2681	7.16355	4.38767	5.47278	4.60213	4.18192e-06
ENSMUSG00000062785	Kcnc3	protein_coding	3.2236	6.2681	7.02923	3.2236	4.88335	4.00814	6.11979e-05
ENSMUSG00000067158	Col4a4	protein_coding	3.40268	6.2681	7.29786	3.40268	3.72683	2.81262	0.00491404
ENSMUSG00000030579	Tyrobp	protein_coding	2.68633	6.2681	7.34264	2.68633	3.53813	2.62287	0.0087193
ENSMUSG00000024935	Slc1a1	protein_coding	2.86542	6.2681	7.11878	2.86542	3.45698	2.53896	0.0111182
ENSMUSG00000038871	Bpgm	protein_coding	1.47748	6.2681	7.20832	1.47748	3.23701	2.3038	0.0212338
ENSMUSG00000034159	2310007B03Rik	protein_coding	1.47748	6.2681	7.20832	1.47748	2.98634	2.0426	0.0410925
ENSMUSG00000037868	Egr2	protein_coding	1.65657	6.2681	7.29786	1.65657	2.95197	2.00695	0.0447551
ENSMUSG00000030707	Coro1a	protein_coding	0.179089	6.2681	7.25309	0.179089	2.66589	1.7213	0.0851956
ENSMUSG00000046985	Tapt1	protein_coding	0.62681	6.2681	7.074	0.62681	2.44553	1.51187	0.130568
ENSMUSG00000020170	Frs2	protein_coding	0.447722	6.2681	7.34264	0.447722	2.2499	1.31617	0.188116
ENSMUSG00000047242	Taf9b	protein_coding	0.0895443	6.2681	7.11878	0.0895443	2.22864	1.29725	0.194547
ENSMUSG00000038679	Trps1	protein_coding	0.313405	6.2681	7.16355	0.313405	2.22765	1.29613	0.194931
ENSMUSG00000009207	Lnp	protein_coding	0.268633	6.2681	6.98446	0.268633	2.18303	1.25295	0.210225
ENSMUSG00000091017	Fam71a	protein_coding	0.134317	6.2681	7.02923	0.134317	2.08427	1.15122	0.249643
ENSMUSG00000038893	Fam117a	protein_coding	-0.223861	6.2681	6.98446	0	1.83538	0.916975	0.359156
ENSMUSG00000055435	Maf	protein_coding	-0.358177	6.2681	7.20832	0	1.52924	0.662449	0.507684
ENSMUSG00000027227	Sord	protein_coding	4.65631	6.22333	7.20832	4.65631	5.91031	5.01066	5.42434e-07
ENSMUSG00000096954	Gdap10	lincRNA	2.64156	6.22333	7.34264	2.64156	4.70285	3.8186	0.00013421
ENSMUSG00000032420	Nt5e	protein_coding	1.25362	6.22333	7.25309	1.25362	2.65435	1.71115	0.0870532
ENSMUSG00000003134	Tbc1d8	protein_coding	0.671583	6.22333	7.25309	0.671583	2.39098	1.45685	0.145158
ENSMUSG00000038094	Atp13a4	protein_coding	0.671583	6.22333	7.20832	0.671583	2.26542	1.32997	0.183528
ENSMUSG00000027601	Mtfr1	protein_coding	0.447722	6.22333	7.074	0.447722	2.24892	1.31617	0.188116
ENSMUSG00000005823	Gpr108	protein_coding	0.0895443	6.22333	7.25309	0.0895443	2.04929	1.11668	0.264131
ENSMUSG00000029449	Rhof	protein_coding	-0.40295	6.22333	7.02923	0	1.81524	0.898471	0.368934
ENSMUSG00000021789	Sftpa1	protein_coding	5.01448	6.17856	7.5665	5.01448	7.16081	6.27617	3.47007e-10
ENSMUSG00000027204	Fbn1	protein_coding	3.67132	6.17856	7.38741	3.67132	5.8614	4.97152	6.64288e-07
ENSMUSG00000033220	Rac2	protein_coding	4.74585	6.17856	7.16355	4.74585	5.19634	4.3217	1.54829e-05
ENSMUSG00000029675	Eln	protein_coding	4.29813	6.17856	7.11878	4.29813	5.04063	4.16249	3.14797e-05
ENSMUSG00000000682	Cd52	protein_coding	4.52199	6.17856	7.47695	4.52199	4.6799	3.79576	0.000147189
ENSMUSG00000030220	Arhgdib	protein_coding	4.29813	6.17856	7.25309	4.29813	4.00008	3.10399	0.00190931
ENSMUSG00000047446	Arl4a	protein_coding	3.62655	6.17856	7.29786	3.62655	3.76523	2.85649	0.00428348
ENSMUSG00000001270	Ckb	protein_coding	4.25336	6.17856	7.20832	4.25336	3.46736	2.5486	0.0108157
ENSMUSG00000033904	Ccp110	protein_coding	1.25362	6.17856	7.11878	1.25362	2.96379	2.01813	0.0435772
ENSMUSG00000028646	Rragc	protein_coding	1.56703	6.17856	7.29786	1.56703	2.87973	1.93361	0.0531616
ENSMUSG00000095762	Gm16378	processed_pseudogene	0.447722	6.17856	6.7606	0.447722	2.62254	1.68272	0.0924292
ENSMUSG00000105434	Gm43359	TEC	1.38794	6.17856	7.16355	1.38794	2.54062	1.60293	0.108949
ENSMUSG00000031666	Rbl2	protein_coding	1.16408	6.17856	7.11878	1.16408	2.49727	1.56047	0.11865
ENSMUSG00000021760	Gpx8	protein_coding	0.62681	6.17856	7.20832	0.62681	2.49292	1.55685	0.119505
ENSMUSG00000038903	Ccdc68	protein_coding	0.179089	6.17856	6.98446	0.179089	2.10148	1.16919	0.242326
ENSMUSG00000022555	Dgat1	protein_coding	-0.179089	6.17856	6.98446	0	1.85401	0.93512	0.349726
ENSMUSG00000028289	Epha7	protein_coding	3.85041	6.13379	7.20832	3.85041	4.56957	3.68005	0.000233192
ENSMUSG00000040170	Fmo2	protein_coding	2.32815	6.13379	6.98446	2.32815	3.04918	2.1055	0.0352482
ENSMUSG00000027439	Gzf1	protein_coding	1.16408	6.13379	7.29786	1.16408	3.00658	2.06305	0.039108
ENSMUSG00000026872	Zeb2	protein_coding	2.01475	6.13379	7.16355	2.01475	2.98185	2.03744	0.0416061
ENSMUSG00000078566	Bnip3	protein_coding	0.761127	6.13379	7.25309	0.761127	2.66425	1.71941	0.085539
ENSMUSG00000045896	Paip2b	protein_coding	0.358177	6.13379	7.20832	0.358177	2.30081	1.36382	0.172626
ENSMUSG00000056962	Jmjd6	protein_coding	0.268633	6.13379	7.074	0.268633	2.16671	1.23693	0.216112
ENSMUSG00000024238	Zeb1	protein_coding	3.93995	6.08902	7.16355	3.93995	4.2094	3.31733	0.000908819
ENSMUSG00000021094	Dhrs7	protein_coding	3.85041	6.08902	7.16355	3.85041	4.07045	3.17719	0.0014871
ENSMUSG00000040181	Fmo1	protein_coding	0.313405	6.08902	6.89491	0.313405	3.93729	3.03751	0.00238545
ENSMUSG00000060969	Irx1	protein_coding	2.50724	6.08902	6.93969	2.50724	3.713	2.79995	0.00511109
ENSMUSG00000043164	Tmem212	protein_coding	3.67132	6.08902	7.16355	3.67132	3.69209	2.77817	0.00546657
ENSMUSG00000031133	Arhgef6	protein_coding	4.11904	6.08902	7.16355	4.11904	3.53077	2.61449	0.00893616
ENSMUSG00000029470	P2rx4	protein_coding	1.65657	6.08902	7.02923	1.65657	2.94927	2.00465	0.0450008
ENSMUSG00000020718	Polg2	protein_coding	1.25362	6.08902	6.93969	1.25362	2.87918	1.93361	0.0531616
ENSMUSG00000068284	Usf3	protein_coding	1.52225	6.08902	7.20832	1.52225	2.7924	1.84591	0.0649054
ENSMUSG00000003546	Klc4	protein_coding	0.805899	6.08902	6.98446	0.805899	2.64522	1.70273	0.0886191
ENSMUSG00000002845	Tmem39a	protein_coding	0.62681	6.08902	7.02923	0.62681	2.54627	1.60754	0.107935
ENSMUSG00000056515	Rab31	protein_coding	0.895443	6.08902	7.074	0.895443	2.54648	1.60754	0.107935
ENSMUSG00000048163	Selplg	protein_coding	0.358177	6.08902	6.89491	0.358177	2.50628	1.5692	0.116601
ENSMUSG00000009687	Fxyd5	protein_coding	0.179089	6.08902	7.074	0.179089	2.08637	1.15287	0.248963
ENSMUSG00000049232	Tigd2	protein_coding	-0.358177	6.08902	6.93969	0	1.84481	0.925388	0.354764
ENSMUSG00000020115	Tbk1	protein_coding	-0.582038	6.08902	7.11878	0	1.74545	0.837892	0.402091
ENSMUSG00000022876	Samsn1	protein_coding	3.31314	6.04424	6.98446	3.31314	5.73529	4.85249	1.21923e-06
ENSMUSG00000000811	Txnrd3	protein_coding	4.25336	6.04424	7.29786	4.25336	5.10066	4.22069	2.4356e-05
ENSMUSG00000075284	Wipf1	protein_coding	4.16381	6.04424	7.074	4.16381	4.51494	3.61905	0.000295691
ENSMUSG00000003200	Sh3gl1	protein_coding	3.67132	6.04424	7.16355	3.67132	4.26767	3.37057	0.000750137
ENSMUSG00000049744	Arhgap15	protein_coding	1.96998	6.04424	6.89491	1.96998	4.10784	3.21657	0.00129735
ENSMUSG00000104802	Gm5869	processed_pseudogene	2.10429	6.04424	6.89491	2.10429	4.09841	3.20846	0.00133448
ENSMUSG00000024878	Cbwd1	protein_coding	3.17882	6.04424	6.98446	3.17882	3.88376	2.97741	0.00290694
ENSMUSG00000025579	Gaa	protein_coding	3.08928	6.04424	7.11878	3.08928	3.59262	2.67521	0.00746829
ENSMUSG00000036905	C1qb	protein_coding	1.88043	6.04424	7.20832	1.88043	3.43828	2.51902	0.0117682
ENSMUSG00000102037	Bcl2a1a	protein_coding	2.68633	6.04424	7.61127	2.68633	3.21459	2.28118	0.0225376
ENSMUSG00000028894	Inpp5b	protein_coding	2.19384	6.04424	7.074	2.19384	3.00337	2.06011	0.0393883
ENSMUSG00000032652	Crebl2	protein_coding	1.79089	6.04424	7.02923	1.79089	2.88353	1.93693	0.0527544
ENSMUSG00000071266	Zfp946	protein_coding	0.895443	6.04424	6.93969	0.895443	2.59001	1.65096	0.0987475
ENSMUSG00000023104	Rfc2	protein_coding	0.62681	6.04424	6.85014	0.62681	2.42064	1.48878	0.136544
ENSMUSG00000031838	Ifi30	protein_coding	0.40295	6.04424	6.93969	0.40295	2.22343	1.29356	0.195817
ENSMUSG00000045690	Wdr89	protein_coding	-0.492494	6.04424	6.67105	0	1.56453	0.694592	0.487311
ENSMUSG00000037669	Ldah	protein_coding	-4.11904	6.04424	6.62628	0	0.805877	0.165657	0.868427
ENSMUSG00000040950	Mgl2	protein_coding	3.71609	5.99947	7.02923	3.71609	5.88497	4.99248	5.96098e-07
ENSMUSG00000021298	Gpr132	protein_coding	3.49223	5.99947	7.074	3.49223	5.72143	4.84005	1.29804e-06
ENSMUSG00000038280	Ostm1	protein_coding	4.11904	5.99947	6.98446	4.11904	4.91726	4.04231	5.29276e-05
ENSMUSG00000087530	Gm15533	antisense	4.07427	5.99947	6.98446	4.07427	4.45843	3.56368	0.000365697
ENSMUSG00000056305	Usp39	protein_coding	3.537	5.99947	6.98446	3.537	4.00547	3.10968	0.00187291
ENSMUSG00000060188	Cxcl17	protein_coding	3.04451	5.99947	7.5665	3.04451	3.80204	2.89306	0.00381503
ENSMUSG00000046351	Zfp322a	protein_coding	2.05952	5.99947	7.11878	2.05952	3.75046	2.8396	0.00451706
ENSMUSG00000032883	Acsl3	protein_coding	2.7311	5.99947	6.98446	2.7311	3.62529	2.70952	0.00673797
ENSMUSG00000032357	Tinag	protein_coding	2.59679	5.99947	6.93969	2.59679	3.62162	2.70566	0.00681694
ENSMUSG00000022240	Ctnnd2	protein_coding	3.49223	5.99947	7.16355	3.49223	3.54805	2.63111	0.00851072
ENSMUSG00000040711	Sh3pxd2b	protein_coding	2.64156	5.99947	7.25309	2.64156	3.50226	2.58717	0.00967669
ENSMUSG00000028581	Laptm5	protein_coding	2.59679	5.99947	7.20832	2.59679	3.44441	2.52536	0.0115579
ENSMUSG00000081344	Gm14303	processed_pseudogene	2.14906	5.99947	6.7606	2.14906	3.28096	2.35061	0.0187426
ENSMUSG00000066233	Tmem42	protein_coding	1.96998	5.99947	6.98446	1.96998	3.04195	2.09955	0.0357682
ENSMUSG00000030214	Plbd1	protein_coding	1.88043	5.99947	7.20832	1.88043	3.01652	2.07382	0.0380962
ENSMUSG00000090213	Tmem189	protein_coding	1.29839	5.99947	6.93969	1.29839	2.85778	1.91438	0.0555715
ENSMUSG00000015087	Rabl6	protein_coding	1.20885	5.99947	6.93969	1.20885	2.78296	1.83547	0.0664363
ENSMUSG00000047854	Stx19	protein_coding	0.761127	5.99947	6.98446	0.761127	2.45586	1.52086	0.128295
ENSMUSG00000019578	Ubxn6	protein_coding	0.984988	5.99947	6.93969	0.984988	2.41706	1.48402	0.137804
ENSMUSG00000019814	Ltv1	protein_coding	-0.761127	5.99947	6.98446	0	1.5182	0.654178	0.512997
ENSMUSG00000033278	Ptprm	protein_coding	4.11904	5.9547	7.02923	4.11904	5.37067	4.50088	6.7672e-06
ENSMUSG00000036814	Slc6a20a	protein_coding	2.64156	5.9547	6.89491	2.64156	4.91193	4.03809	5.38879e-05
ENSMUSG00000032740	Ccdc88a	protein_coding	3.2236	5.9547	7.11878	3.2236	3.67723	2.76102	0.00576215
ENSMUSG00000028238	Atp6v0d2	protein_coding	3.89518	5.9547	6.98446	3.89518	3.37423	2.45109	0.0142424
ENSMUSG00000039270	Megf9	protein_coding	1.83566	5.9547	6.98446	1.83566	2.86323	1.9188	0.0550093
ENSMUSG00000098641	Rnu3b4	snoRNA	1.16408	5.9547	6.71583	1.16408	2.72448	1.77941	0.0751722
ENSMUSG00000098925	Rnu3b2	snoRNA	1.16408	5.9547	6.71583	1.16408	2.72448	1.77941	0.0751722
ENSMUSG00000104856	Rnu3b3	snoRNA	1.16408	5.9547	6.71583	1.16408	2.72448	1.77941	0.0751722
ENSMUSG00000105025	Rnu3b1	snoRNA	1.16408	5.9547	6.71583	1.16408	2.72448	1.77941	0.0751722
ENSMUSG00000026705	Klhl20	protein_coding	0.940216	5.9547	6.98446	0.940216	2.71427	1.7685	0.0769772
ENSMUSG00000056666	Retsat	protein_coding	0.895443	5.9547	6.89491	0.895443	2.68418	1.73839	0.0821428
ENSMUSG00000040537	Adam22	protein_coding	1.1193	5.9547	6.89491	1.1193	2.66979	1.72475	0.0845728
ENSMUSG00000032062	2310030G06Rik	protein_coding	0.984988	5.9547	6.89491	0.984988	2.58881	1.64965	0.0990137
ENSMUSG00000027602	Map1lc3a	protein_coding	1.16408	5.9547	6.85014	1.16408	2.46165	1.52693	0.126778
ENSMUSG00000028385	Snx30	protein_coding	0.761127	5.9547	6.80537	0.761127	2.39152	1.45696	0.145127
ENSMUSG00000025190	Got1	protein_coding	0.671583	5.9547	6.67105	0.671583	2.38302	1.45036	0.146958
ENSMUSG00000074564	Gm10720	protein_coding	0.492494	5.9547	6.7606	0.492494	2.32094	1.38136	0.16717
ENSMUSG00000063047	Zfp780b	protein_coding	-1.47748	5.9547	7.02923	0	1.35245	0.53196	0.594754
ENSMUSG00000016087	Fli1	protein_coding	3.71609	5.90993	6.7606	3.71609	5.89773	5.0029	5.64756e-07
ENSMUSG00000051048	P4ha3	protein_coding	3.62655	5.90993	6.80537	3.62655	5.86455	4.97304	6.59127e-07
ENSMUSG00000024653	Scgb1a1	protein_coding	3.58177	5.90993	6.80537	3.58177	5.25934	4.38542	1.15763e-05
ENSMUSG00000024168	Tmem204	protein_coding	2.19384	5.90993	6.7606	2.19384	5.13308	4.25169	2.12161e-05
ENSMUSG00000021879	Dnah12	protein_coding	3.40268	5.90993	6.85014	3.40268	3.75999	2.85046	0.00436564
ENSMUSG00000027472	Pdrg1	protein_coding	3.17882	5.90993	7.02923	3.17882	3.70507	2.79291	0.00522356
ENSMUSG00000094627	Gm10182	processed_pseudogene	2.64156	5.90993	7.074	2.64156	3.56998	2.65364	0.00796294
ENSMUSG00000020717	Pecam1	protein_coding	1.47748	5.90993	6.85014	1.47748	2.97013	2.02522	0.0428449
ENSMUSG00000061119	Prcp	protein_coding	1.65657	5.90993	6.98446	1.65657	2.95385	2.00859	0.0445809
ENSMUSG00000005534	Insr	protein_coding	1.20885	5.90993	6.89491	1.20885	2.85845	1.91486	0.0555101
ENSMUSG00000039765	Cc2d2a	protein_coding	1.65657	5.90993	7.02923	1.65657	2.79792	1.84926	0.0644206
ENSMUSG00000039166	Akap7	protein_coding	0.268633	5.90993	6.89491	0.268633	2.78067	1.83318	0.0667753
ENSMUSG00000037826	Ppm1k	protein_coding	1.25362	5.90993	6.85014	1.25362	2.71591	1.76956	0.0768005
ENSMUSG00000041654	Slc39a11	protein_coding	1.47748	5.90993	6.85014	1.47748	2.59218	1.65209	0.0985155
ENSMUSG00000021470	Ercc6l2	protein_coding	0.492494	5.90993	7.11878	0.492494	2.33314	1.39347	0.163478
ENSMUSG00000038773	Kdm3b	protein_coding	0.223861	5.90993	6.71583	0.223861	2.18773	1.25694	0.208777
ENSMUSG00000092329	Gm20388	protein_coding	0.179089	5.90993	6.67105	0.179089	2.11187	1.18093	0.237631
ENSMUSG00000071660	Ttc9c	protein_coding	-0.0895443	5.90993	6.67105	0	1.93828	1.01171	0.311677
ENSMUSG00000041012	Cmtm8	protein_coding	-0.223861	5.90993	6.7606	0	1.86095	0.941391	0.346504
ENSMUSG00000040929	Rfx3	protein_coding	-0.447722	5.90993	6.93969	0	1.68572	0.794946	0.426645
ENSMUSG00000021712	Trim23	protein_coding	-0.984988	5.90993	6.7606	0	1.68027	0.791184	0.428837
ENSMUSG00000090516	Rps11-ps1	processed_pseudogene	-0.716355	5.90993	6.58151	0	1.56858	0.697292	0.48562
ENSMUSG00000029641	Rasl11a	protein_coding	3.62655	5.86515	6.93969	3.62655	5.78648	4.90261	9.45703e-07
ENSMUSG00000048371	Pdp2	protein_coding	4.11904	5.86515	7.074	4.11904	5.36814	4.49931	6.81741e-06
ENSMUSG00000033083	Tbc1d4	protein_coding	3.76086	5.86515	6.98446	3.76086	4.80196	3.92705	8.59941e-05
ENSMUSG00000038648	Creb3l2	protein_coding	4.07427	5.86515	7.16355	4.07427	4.37527	3.47478	0.000511277
ENSMUSG00000039497	Dse	protein_coding	3.44746	5.86515	6.85014	3.44746	4.16261	3.27143	0.00107006
ENSMUSG00000011148	Adssl1	protein_coding	3.67132	5.86515	6.80537	3.67132	4.09787	3.20846	0.00133448
ENSMUSG00000005124	Wisp1	protein_coding	2.46247	5.86515	6.85014	2.46247	3.50127	2.58645	0.00969703
ENSMUSG00000044252	Osbpl1a	protein_coding	2.23861	5.86515	6.93969	2.23861	3.19627	2.26238	0.023674
ENSMUSG00000031485	Prosc	protein_coding	1.56703	5.86515	6.7606	1.56703	2.91786	1.97238	0.0485667
ENSMUSG00000026126	Ptpn18	protein_coding	1.65657	5.86515	6.71583	1.65657	2.76964	1.82367	0.0682022
ENSMUSG00000095186	Gm10718	protein_coding	0.984988	5.86515	6.85014	0.984988	2.64072	1.69902	0.0893161
ENSMUSG00000074030	Exoc8	protein_coding	1.1193	5.86515	7.074	1.1193	2.60223	1.66246	0.0964204
ENSMUSG00000099974	Bcl2a1d	protein_coding	0.40295	5.86515	7.02923	0.40295	2.25864	1.32423	0.185426
ENSMUSG00000058444	Map2k5	protein_coding	-0.179089	5.86515	6.80537	0	1.91762	0.992304	0.321049
ENSMUSG00000059824	Dbp	protein_coding	-0.268633	5.86515	6.62628	0	1.84523	0.925452	0.354731
ENSMUSG00000075528	Aarsd1	protein_coding	-0.447722	5.86515	6.71583	0	1.83889	0.918426	0.358396
ENSMUSG00000021186	Fbln5	protein_coding	4.20858	5.82038	6.80537	4.20858	6.14878	5.24191	1.58919e-07
ENSMUSG00000021217	Tshz3	protein_coding	1.07453	5.82038	6.53674	1.07453	4.6709	3.78682	0.000152588
ENSMUSG00000027737	Slc7a11	protein_coding	3.35791	5.82038	6.85014	3.35791	3.58319	2.66716	0.00764943
ENSMUSG00000062944	9130023H24Rik	protein_coding	2.91019	5.82038	6.7606	2.91019	3.44683	2.52796	0.0114727
ENSMUSG00000070287	Slc35g2	protein_coding	1.70134	5.82038	6.62628	1.70134	2.88481	1.93824	0.0525935
ENSMUSG00000020577	Tspan13	protein_coding	2.05952	5.82038	6.80537	2.05952	2.87649	1.93298	0.0532391
ENSMUSG00000097006	9530082P21Rik	lincRNA	1.74611	5.82038	6.71583	1.74611	2.76437	1.81939	0.0688515
ENSMUSG00000082674	Gm11914	processed_pseudogene	1.20885	5.82038	6.93969	1.20885	2.70626	1.75984	0.0784349
ENSMUSG00000025648	Pfkfb4	protein_coding	1.07453	5.82038	6.85014	1.07453	2.55714	1.61798	0.105667
ENSMUSG00000034957	Cebpa	protein_coding	0.895443	5.82038	6.67105	0.895443	2.40194	1.46907	0.141812
ENSMUSG00000096519	Gm10721	protein_coding	0.671583	5.82038	6.80537	0.671583	2.39404	1.45988	0.144324
ENSMUSG00000031024	St5	protein_coding	0.537266	5.82038	6.85014	0.537266	2.31876	1.37922	0.167826
ENSMUSG00000022561	Gpaa1	protein_coding	0.447722	5.82038	6.98446	0.447722	2.29495	1.35707	0.17476
ENSMUSG00000049792	Bag5	protein_coding	0.223861	5.82038	6.80537	0.223861	2.15888	1.22903	0.21906
ENSMUSG00000024037	Wdr4	protein_coding	0.0447722	5.82038	6.7606	0.0447722	1.97993	1.04918	0.294093
ENSMUSG00000029326	Enoph1	protein_coding	-0.850671	5.82038	6.67105	0	1.58311	0.707227	0.479425
ENSMUSG00000035824	Tk2	protein_coding	-1.07453	5.82038	6.71583	0	1.48858	0.634472	0.525773
ENSMUSG00000041548	Hspb8	protein_coding	3.04451	5.77561	6.7606	3.04451	3.96139	3.06505	0.00217634
ENSMUSG00000027905	Ddx20	protein_coding	2.82065	5.77561	6.71583	2.82065	3.7159	2.80299	0.00506305
ENSMUSG00000059325	Hopx	protein_coding	2.86542	5.77561	6.80537	2.86542	3.54265	2.62592	0.00864161
ENSMUSG00000026347	Tmem163	protein_coding	0.940216	5.77561	6.67105	0.940216	3.26907	2.33801	0.0193865
ENSMUSG00000024270	Slc39a6	protein_coding	3.13405	5.77561	6.89491	3.13405	3.15851	2.22303	0.0262137
ENSMUSG00000040852	Plekhh2	protein_coding	3.85041	5.77561	6.98446	3.85041	3.13687	2.19954	0.0278393
ENSMUSG00000053398	Phgdh	protein_coding	0.716355	5.77561	6.7606	0.716355	3.01238	2.06997	0.0384555
ENSMUSG00000028047	Thbs3	protein_coding	2.7311	5.77561	7.02923	2.7311	2.89508	1.94694	0.0515418
ENSMUSG00000105019	Gm43547	TEC	1.07453	5.77561	6.7606	1.07453	2.65802	1.714	0.086528
ENSMUSG00000096956	Snhg18	lincRNA	1.25362	5.77561	6.80537	1.25362	2.64824	1.70399	0.0883824
ENSMUSG00000019990	Pde7b	protein_coding	1.02976	5.77561	6.80537	1.02976	2.64208	1.69992	0.0891453
ENSMUSG00000034111	Tmed8	protein_coding	-0.223861	5.77561	6.7606	0	1.87603	0.956566	0.338786
ENSMUSG00000040813	Tex264	protein_coding	-1.07453	5.77561	6.71583	0	1.20663	0.422312	0.672797
ENSMUSG00000068250	Amn1	protein_coding	-2.91019	5.77561	6.58151	0	1.05412	0.319035	0.7497
ENSMUSG00000009114	2610028H24Rik	protein_coding	3.76086	5.73084	7.074	3.76086	5.96271	5.05981	4.19685e-07
ENSMUSG00000044468	Fam46c	protein_coding	3.85041	5.73084	6.62628	3.85041	5.90449	5.0062	5.55142e-07
ENSMUSG00000031548	Sfrp1	protein_coding	3.17882	5.73084	6.67105	3.17882	5.66415	4.78578	1.70323e-06
ENSMUSG00000074622	Mafb	protein_coding	2.77587	5.73084	6.62628	2.77587	4.77074	3.89151	9.96238e-05
ENSMUSG00000028179	Cth	protein_coding	0.761127	5.73084	6.67105	0.761127	4.65587	3.77119	0.000162474
ENSMUSG00000001211	Agpat3	protein_coding	3.31314	5.73084	6.89491	3.31314	3.87857	2.97161	0.00296246
ENSMUSG00000042834	Nrep	protein_coding	2.7311	5.73084	6.85014	2.7311	3.82439	2.91623	0.00354288
ENSMUSG00000093467	Gm20659	antisense	3.04451	5.73084	6.67105	3.04451	3.64314	2.72885	0.00635564
ENSMUSG00000038608	Dock10	protein_coding	3.17882	5.73084	6.98446	3.17882	3.46925	2.5505	0.0107569
ENSMUSG00000036432	Siah2	protein_coding	2.4177	5.73084	6.7606	2.4177	3.12979	2.1935	0.0282714
ENSMUSG00000034771	Tle2	protein_coding	0.537266	5.73084	6.71583	0.537266	2.89805	1.94967	0.051216
ENSMUSG00000097296	Gm26532	lincRNA	1.70134	5.73084	6.80537	1.70134	2.89293	1.94602	0.0516527
ENSMUSG00000059498	Fcgr3	protein_coding	0.313405	5.73084	6.93969	0.313405	2.84727	1.903	0.0570408
ENSMUSG00000053093	Myh7	protein_coding	1.96998	5.73084	6.85014	1.96998	2.8046	1.85591	0.0634665
ENSMUSG00000074582	Arfgef2	protein_coding	1.52225	5.73084	6.89491	1.52225	2.78043	1.83318	0.0667753
ENSMUSG00000044626	Liph	protein_coding	1.20885	5.73084	6.67105	1.20885	2.57294	1.63305	0.102458
ENSMUSG00000030534	Vps33b	protein_coding	0.805899	5.73084	6.71583	0.805899	2.51185	1.57414	0.115455
ENSMUSG00000045409	Trim39	protein_coding	0.671583	5.73084	6.67105	0.671583	2.4473	1.51368	0.130107
ENSMUSG00000029125	Stx18	protein_coding	0.716355	5.73084	6.85014	0.716355	2.40772	1.47454	0.140335
ENSMUSG00000048787	Dcun1d3	protein_coding	0.492494	5.73084	6.7606	0.492494	2.24752	1.31555	0.188324
ENSMUSG00000002059	Rab34	protein_coding	0.268633	5.73084	6.71583	0.268633	2.16515	1.23553	0.216634
ENSMUSG00000024542	Cep192	protein_coding	0.313405	5.73084	6.58151	0.313405	2.07548	1.14393	0.252654
ENSMUSG00000049940	Pgrmc2	protein_coding	-1.16408	5.73084	6.62628	0	1.36259	0.537236	0.591105
ENSMUSG00000050668	Gpatch11	protein_coding	-2.55201	5.73084	6.53674	0	1.30041	0.494032	0.621283
ENSMUSG00000022639	Dubr	lincRNA	-1.16408	5.73084	6.58151	0	1.28975	0.483883	0.628469
ENSMUSG00000051331	Cacna1c	protein_coding	3.40268	5.68607	6.71583	3.40268	5.73537	4.85249	1.21923e-06
ENSMUSG00000027380	Acoxl	protein_coding	3.71609	5.68607	6.93969	3.71609	5.13075	4.25019	2.13585e-05
ENSMUSG00000021069	Pygl	protein_coding	3.26837	5.68607	6.67105	3.26837	4.61484	3.72847	0.000192646
ENSMUSG00000001700	Gramd3	protein_coding	2.37293	5.68607	6.71583	2.37293	4.20032	3.31035	0.000931792
ENSMUSG00000027435	Cd93	protein_coding	2.59679	5.68607	6.80537	2.59679	3.72197	2.80768	0.00499005
ENSMUSG00000102856	Gm37084	TEC	3.17882	5.68607	6.7606	3.17882	3.67421	2.75837	0.00580911
ENSMUSG00000035493	Tgfbi	protein_coding	3.40268	5.68607	6.80537	3.40268	3.51513	2.59823	0.00937047
ENSMUSG00000032179	Bmp5	protein_coding	2.99974	5.68607	6.7606	2.99974	3.40229	2.48079	0.0131092
ENSMUSG00000024273	2700062C07Rik	protein_coding	2.46247	5.68607	6.98446	2.46247	3.12506	2.18912	0.0285883
ENSMUSG00000026765	Lypd6b	protein_coding	1.43271	5.68607	6.71583	1.43271	3.09285	2.15129	0.0314535
ENSMUSG00000027186	Elf5	protein_coding	1.47748	5.68607	6.58151	1.47748	2.55937	1.61993	0.105247
ENSMUSG00000024982	Zdhhc6	protein_coding	1.16408	5.68607	6.62628	1.16408	2.47877	1.54514	0.122313
ENSMUSG00000041075	Fzd7	protein_coding	0.895443	5.68607	6.89491	0.895443	2.4611	1.52651	0.126882
ENSMUSG00000022960	Donson	protein_coding	0.761127	5.68607	6.7606	0.761127	2.34768	1.40857	0.158961
ENSMUSG00000024232	Bambi	protein_coding	-0.223861	5.68607	6.7606	0	1.86594	0.945908	0.344196
ENSMUSG00000031446	Cul4a	protein_coding	-0.671583	5.68607	6.53674	0	1.35809	0.534557	0.592956
ENSMUSG00000026707	Nsun6	protein_coding	-2.95496	5.68607	6.53674	0	1.07247	0.328992	0.742162
ENSMUSG00000048865	Arhgap30	protein_coding	3.58177	5.64129	6.7606	3.58177	5.81824	4.92957	8.24118e-07
ENSMUSG00000071713	Csf2rb	protein_coding	3.76086	5.64129	6.89491	3.76086	4.45611	3.56254	0.00036729
ENSMUSG00000030077	Chl1	protein_coding	0.716355	5.64129	6.98446	0.716355	4.35408	3.45648	0.000547271
ENSMUSG00000029233	Srd5a3	protein_coding	3.71609	5.64129	6.80537	3.71609	4.35156	3.45526	0.000549767
ENSMUSG00000055172	C1ra	protein_coding	3.17882	5.64129	6.71583	3.17882	4.03108	3.13441	0.00172197
ENSMUSG00000036103	Colec12	protein_coding	3.26837	5.64129	6.71583	3.26837	3.9713	3.07411	0.00211135
ENSMUSG00000096736	Gm17535	protein_coding	2.99974	5.64129	6.80537	2.99974	3.87787	2.97139	0.00296459
ENSMUSG00000042284	Itga1	protein_coding	0.447722	5.64129	6.40242	0.447722	3.59551	2.67775	0.00741179
ENSMUSG00000103996	4833421G17Rik	TEC	2.37293	5.64129	6.71583	2.37293	3.57862	2.66186	0.00777094
ENSMUSG00000029167	Ppargc1a	protein_coding	2.77587	5.64129	6.71583	2.77587	3.55516	2.63772	0.00834658
ENSMUSG00000019992	Mtfr2	protein_coding	2.59679	5.64129	6.67105	2.59679	3.26591	2.33487	0.0195501
ENSMUSG00000105643	Gm42611	TEC	1.6118	5.64129	6.62628	1.6118	2.92479	1.979	0.0478161
ENSMUSG00000000782	Tcf7	protein_coding	2.05952	5.64129	6.58151	2.05952	2.79727	1.84879	0.0644878
ENSMUSG00000054008	Ndst1	protein_coding	1.02976	5.64129	6.67105	1.02976	2.66003	1.71591	0.0861786
ENSMUSG00000039461	Tcta	protein_coding	1.52225	5.64129	6.85014	1.52225	2.59093	1.65148	0.098641
ENSMUSG00000000194	Gpr107	protein_coding	1.02976	5.64129	6.67105	1.02976	2.54909	1.61039	0.107314
ENSMUSG00000041000	Trim62	protein_coding	0.62681	5.64129	6.85014	0.62681	2.43121	1.49928	0.133802
ENSMUSG00000009555	Cdk9	protein_coding	0.40295	5.64129	6.71583	0.40295	2.24852	1.31617	0.188116
ENSMUSG00000016128	Stard13	protein_coding	0.761127	5.64129	6.53674	0.761127	2.21471	1.2841	0.199109
ENSMUSG00000034453	Polr3b	protein_coding	0.492494	5.64129	6.71583	0.492494	2.21329	1.2829	0.199527
ENSMUSG00000037315	Jade3	protein_coding	0.0895443	5.64129	6.80537	0.0895443	2.03609	1.10405	0.26957
ENSMUSG00000079084	Ccdc82	protein_coding	0.0447722	5.64129	6.89491	0.0447722	2.00678	1.07579	0.282021
ENSMUSG00000059482	2610301B20Rik	protein_coding	-0.179089	5.64129	6.40242	0	1.90078	0.977909	0.328119
ENSMUSG00000050777	Tmem37	protein_coding	-0.223861	5.64129	6.58151	0	1.85437	0.935385	0.34959
ENSMUSG00000108368	Gm45053	TEC	-0.62681	5.64129	6.67105	0	1.78098	0.86639	0.386276
ENSMUSG00000038497	Tmco3	protein_coding	-0.582038	5.64129	6.58151	0	1.5951	0.716419	0.473733
ENSMUSG00000047789	Slc38a9	protein_coding	-0.62681	5.64129	6.62628	0	1.57605	0.702428	0.482412
ENSMUSG00000109498	Gm45222	TEC	-1.16408	5.64129	6.62628	0	1.56234	0.692258	0.488775
ENSMUSG00000046111	Cep295	protein_coding	-1.83566	5.64129	6.44719	0	1.38673	0.553647	0.579821
ENSMUSG00000056091	St3gal5	protein_coding	3.76086	5.59652	6.7606	3.76086	5.95196	5.04972	4.42465e-07
ENSMUSG00000062480	Acat3	protein_coding	3.35791	5.59652	6.62628	3.35791	4.67124	3.78682	0.000152588
ENSMUSG00000030347	D6Wsu163e	protein_coding	1.38794	5.59652	6.49196	1.38794	3.43834	2.51902	0.0117682
ENSMUSG00000056749	Nfil3	protein_coding	2.82065	5.59652	6.67105	2.82065	3.42427	2.50351	0.0122969
ENSMUSG00000019368	Sec14l4	protein_coding	1.74611	5.59652	6.58151	1.74611	2.94688	2.00275	0.0452039
ENSMUSG00000048307	Ankrd46	protein_coding	1.47748	5.59652	6.58151	1.47748	2.87894	1.93361	0.0531616
ENSMUSG00000029270	Fam69a	protein_coding	1.20885	5.59652	6.62628	1.20885	2.69845	1.75383	0.07946
ENSMUSG00000027628	Aar2	protein_coding	1.25362	5.59652	6.49196	1.25362	2.56188	1.62201	0.1048
ENSMUSG00000022898	Dscr3	protein_coding	0.895443	5.59652	6.62628	0.895443	2.4789	1.54514	0.122313
ENSMUSG00000006567	Atp7b	protein_coding	0.358177	5.59652	6.67105	0.358177	2.25849	1.32423	0.185426
ENSMUSG00000045414	1190002N15Rik	protein_coding	0.268633	5.59652	6.53674	0.268633	2.22683	1.29613	0.194931
ENSMUSG00000021311	Mtr	protein_coding	-0.268633	5.59652	6.35765	0	1.82054	0.902511	0.366786
ENSMUSG00000099021	Rn7s1	misc_RNA	-0.447722	5.59652	6.44719	0	1.78784	0.871538	0.383461
ENSMUSG00000099250	Rn7s2	misc_RNA	-0.447722	5.59652	6.44719	0	1.78784	0.871538	0.383461
ENSMUSG00000072680	Tmem254c	protein_coding	-0.358177	5.59652	6.7606	0	1.75659	0.847696	0.396607
ENSMUSG00000029253	Cenpc1	protein_coding	-0.492494	5.59652	6.58151	0	1.75172	0.843165	0.399136
ENSMUSG00000022584	Ly6c2	protein_coding	-0.134317	5.59652	6.58151	0	1.69299	0.799716	0.423875
ENSMUSG00000003234	Abcf3	protein_coding	-0.761127	5.59652	6.62628	0	1.5801	0.705566	0.480458
ENSMUSG00000035245	Eogt	protein_coding	-1.70134	5.59652	6.44719	0	1.41344	0.573454	0.566338
ENSMUSG00000041040	Fam117b	protein_coding	-0.895443	5.59652	6.53674	0	1.34227	0.523551	0.600591
ENSMUSG00000071226	Cecr2	protein_coding	-0.850671	5.59652	6.58151	0	1.31299	0.501839	0.615781
ENSMUSG00000046675	Tmem251	protein_coding	-3.35791	5.59652	6.49196	0	1.09761	0.343204	0.731445
ENSMUSG00000005374	Tbl2	protein_coding	2.10429	5.55175	6.67105	2.10429	5.08395	4.20447	2.61695e-05
ENSMUSG00000045362	Tnfrsf26	protein_coding	2.19384	5.55175	6.53674	2.19384	4.97453	4.09407	4.23866e-05
ENSMUSG00000071001	Hrct1	protein_coding	2.59679	5.55175	6.58151	2.59679	4.65382	3.77	0.000163245
ENSMUSG00000033066	Gas7	protein_coding	2.14906	5.55175	6.58151	2.14906	4.52067	3.62418	0.000289878
ENSMUSG00000041112	Elmo1	protein_coding	2.59679	5.55175	6.49196	2.59679	3.35138	2.42489	0.015313
ENSMUSG00000020176	Grb10	protein_coding	2.82065	5.55175	6.80537	2.82065	3.18525	2.25082	0.0243967
ENSMUSG00000035919	Bbs9	protein_coding	2.05952	5.55175	6.71583	2.05952	2.99835	2.0547	0.039908
ENSMUSG00000029458	Brap	protein_coding	1.43271	5.55175	6.67105	1.43271	2.94345	1.999	0.0456081
ENSMUSG00000031379	Pir	protein_coding	1.34317	5.55175	6.67105	1.34317	2.76482	1.8196	0.0688203
ENSMUSG00000001604	Tcea3	protein_coding	1.38794	5.55175	6.71583	1.38794	2.72503	1.77941	0.0751722
ENSMUSG00000003604	Aven	protein_coding	0.62681	5.55175	6.67105	0.62681	2.28765	1.35177	0.176447
ENSMUSG00000040434	Gyltl1b	protein_coding	0.179089	5.55175	6.71583	0.179089	2.13415	1.2031	0.228937
ENSMUSG00000026708	Cenpl	protein_coding	-1.16408	5.55175	6.53674	0	1.69387	0.799876	0.423783
ENSMUSG00000050737	Ptges	protein_coding	-0.940216	5.55175	6.53674	0	1.28838	0.482621	0.629365
ENSMUSG00000030691	Fchsd2	protein_coding	-1.25362	5.55175	6.31288	0	1.26126	0.46269	0.643587
ENSMUSG00000029385	Ccng2	protein_coding	-1.20885	5.55175	6.58151	0	1.16354	0.392169	0.694934
ENSMUSG00000071064	Zfp827	protein_coding	-3.62655	5.55175	6.53674	0	1.13166	0.366573	0.713938
ENSMUSG00000041515	Irf8	protein_coding	0.492494	5.50698	6.62628	0.492494	4.17383	3.28384	0.00102403
ENSMUSG00000079470	Utp14b	protein_coding	3.08928	5.50698	6.62628	3.08928	4.14857	3.2577	0.00112319
ENSMUSG00000038175	Mylip	protein_coding	3.2236	5.50698	6.7606	3.2236	3.76741	2.85738	0.00427157
ENSMUSG00000021497	Txndc15	protein_coding	2.37293	5.50698	6.71583	2.37293	3.053	2.10969	0.0348849
ENSMUSG00000017561	Crlf3	protein_coding	1.9252	5.50698	6.58151	1.9252	2.94933	2.00465	0.0450008
ENSMUSG00000030588	Yif1b	protein_coding	2.28338	5.50698	6.71583	2.28338	2.91958	1.97369	0.0484167
ENSMUSG00000023235	Ccl25	protein_coding	3.2236	5.50698	6.53674	3.2236	2.7926	1.84591	0.0649054
ENSMUSG00000025583	Rptor	protein_coding	1.34317	5.50698	6.62628	1.34317	2.64243	1.70001	0.0891283
ENSMUSG00000037025	Foxa2	protein_coding	1.47748	5.50698	6.49196	1.47748	2.55759	1.61824	0.105612
ENSMUSG00000054920	Klhl5	protein_coding	0.447722	5.50698	6.58151	0.447722	2.40925	1.47533	0.140123
ENSMUSG00000098557	Kctd12	protein_coding	0.62681	5.50698	6.58151	0.62681	2.30881	1.37166	0.170169
ENSMUSG00000028995	Fam126a	protein_coding	0.223861	5.50698	6.44719	0.223861	2.11284	1.18142	0.237434
ENSMUSG00000024691	Fam111a	protein_coding	0.179089	5.50698	6.7606	0.179089	2.08714	1.15307	0.24888
ENSMUSG00000025531	Chm	protein_coding	0.134317	5.50698	6.53674	0.134317	2.05647	1.12458	0.260767
ENSMUSG00000026289	Atg16l1	protein_coding	-0.447722	5.50698	6.44719	0	1.82276	0.903386	0.366321
ENSMUSG00000017478	Zc3h18	protein_coding	-0.223861	5.50698	6.58151	0	1.8112	0.895111	0.370728
ENSMUSG00000031902	Nfatc3	protein_coding	-0.492494	5.50698	6.44719	0	1.77671	0.862257	0.388546
ENSMUSG00000022150	Dab2	protein_coding	-0.40295	5.50698	6.67105	0	1.75936	0.849488	0.39561
ENSMUSG00000104030	5330406M23Rik	TEC	-0.358177	5.50698	6.58151	0	1.70752	0.807024	0.419653
ENSMUSG00000015747	Vps45	protein_coding	-2.37293	5.50698	6.44719	0	1.47254	0.62181	0.534067
ENSMUSG00000027778	Ift80	protein_coding	-0.62681	5.50698	6.53674	0	1.47291	0.62181	0.534067
ENSMUSG00000027207	Galk2	protein_coding	-1.02976	5.50698	6.67105	0	1.40819	0.570692	0.568208
ENSMUSG00000064090	Vrk2	protein_coding	-2.86542	5.50698	6.40242	0	1.39449	0.559957	0.575509
ENSMUSG00000043183	Simc1	protein_coding	-1.1193	5.50698	6.31288	0	1.38997	0.556027	0.578192
ENSMUSG00000032409	Atr	protein_coding	-1.34317	5.50698	6.58151	0	1.30278	0.495486	0.620257
ENSMUSG00000046027	Stard5	protein_coding	-1.16408	5.50698	6.35765	0	1.2938	0.487385	0.625985
ENSMUSG00000020900	Myh10	protein_coding	-1.1193	5.50698	6.35765	0	1.28762	0.48165	0.630054
ENSMUSG00000057143	Trim12c	protein_coding	-1.29839	5.50698	6.58151	0	1.19528	0.413355	0.679347
ENSMUSG00000109005	Gm45221	TEC	-3.71609	5.50698	6.49196	0	1.14919	0.379617	0.704229
ENSMUSG00000039196	Orm1	protein_coding	3.2236	5.4622	6.71583	3.2236	5.64766	4.77174	1.82638e-06
ENSMUSG00000010663	Fads1	protein_coding	2.82065	5.4622	6.62628	2.82065	5.56107	4.69186	2.70738e-06
ENSMUSG00000026394	Atp6v1g3	protein_coding	3.13405	5.4622	6.71583	3.13405	4.3951	3.49741	0.000469793
ENSMUSG00000020017	Hal	protein_coding	2.82065	5.4622	6.53674	2.82065	4.12918	3.23802	0.00120363
ENSMUSG00000024621	Csf1r	protein_coding	2.64156	5.4622	6.62628	2.64156	3.77164	2.86148	0.00421662
ENSMUSG00000015653	Steap2	protein_coding	3.08928	5.4622	6.49196	3.08928	3.71587	2.80299	0.00506305
ENSMUSG00000005949	Ctns	protein_coding	2.4177	5.4622	6.49196	2.4177	3.28258	2.35171	0.0186872
ENSMUSG00000018819	Lsp1	protein_coding	3.17882	5.4622	6.67105	3.17882	3.20575	2.27146	0.0231193
ENSMUSG00000031596	Slc7a2	protein_coding	1.96998	5.4622	6.67105	1.96998	2.89362	1.94618	0.0516333
ENSMUSG00000027035	Cers6	protein_coding	1.79089	5.4622	6.49196	1.79089	2.86789	1.92358	0.0544066
ENSMUSG00000044674	Fzd1	protein_coding	2.10429	5.4622	6.40242	2.10429	2.77496	1.82773	0.0675899
ENSMUSG00000030527	Crtc3	protein_coding	1.6118	5.4622	6.58151	1.6118	2.73589	1.79114	0.0732708
ENSMUSG00000018796	Acsl1	protein_coding	1.20885	5.4622	6.40242	1.20885	2.54945	1.61049	0.107291
ENSMUSG00000032715	Trib3	protein_coding	0.223861	5.4622	6.49196	0.223861	2.2494	1.31617	0.188116
ENSMUSG00000029434	Vps33a	protein_coding	0.223861	5.4622	6.49196	0.223861	2.10291	1.1706	0.241758
ENSMUSG00000026185	Igfbp5	protein_coding	0.179089	5.4622	6.35765	0.179089	2.05614	1.1244	0.260843
ENSMUSG00000029454	Mapkapk5	protein_coding	-0.40295	5.4622	6.49196	0	1.78285	0.867505	0.385665
ENSMUSG00000038437	Mllt6	protein_coding	-0.716355	5.4622	6.31288	0	1.70508	0.805135	0.420742
ENSMUSG00000024457	Trim26	protein_coding	-0.940216	5.4622	6.49196	0	1.57189	0.700154	0.483831
ENSMUSG00000083240	Gm13453	processed_pseudogene	-1.16408	5.4622	6.40242	0	1.48035	0.627569	0.530287
ENSMUSG00000103672	Gm37621	TEC	-2.95496	5.4622	6.31288	0	1.27474	0.471875	0.637016
ENSMUSG00000021432	Slc35b3	protein_coding	-4.52199	5.4622	6.40242	0	0.929375	0.245183	0.806314
ENSMUSG00000074766	Ism1	protein_coding	2.59679	5.41743	6.40242	2.59679	5.43637	4.56607	4.96952e-06
ENSMUSG00000071550	Cfap44	protein_coding	0.940216	5.41743	6.35765	0.940216	3.89303	2.98651	0.00282184
ENSMUSG00000071230	Npw	protein_coding	2.46247	5.41743	6.49196	2.46247	3.68416	2.76926	0.0056183
ENSMUSG00000037795	N4bp2	protein_coding	2.23861	5.41743	6.80537	2.23861	3.28286	2.35171	0.0186872
ENSMUSG00000024429	Gnl1	protein_coding	2.28338	5.41743	6.58151	2.28338	3.12367	2.18775	0.028688
ENSMUSG00000037049	Smpd1	protein_coding	1.9252	5.41743	6.58151	1.9252	2.92042	1.97439	0.0483373
ENSMUSG00000029640	Usp12	protein_coding	1.70134	5.41743	6.53674	1.70134	2.82067	1.87291	0.0610811
ENSMUSG00000020525	Ppm1d	protein_coding	1.6118	5.41743	6.44719	1.6118	2.67891	1.73469	0.0827951
ENSMUSG00000059040	Eno1b	protein_coding	0.984988	5.41743	6.67105	0.984988	2.40255	1.4696	0.14167
ENSMUSG00000020788	Atp2a3	protein_coding	2.23861	5.41743	6.67105	2.23861	2.38495	1.45212	0.146467
ENSMUSG00000041351	Rap1gap	protein_coding	0.671583	5.41743	6.49196	0.671583	2.38536	1.45212	0.146467
ENSMUSG00000051185	Fam174a	protein_coding	0.447722	5.41743	6.49196	0.447722	2.36033	1.42368	0.15454
ENSMUSG00000020593	Lpin1	protein_coding	0.582038	5.41743	6.35765	0.582038	2.32535	1.38531	0.165957
ENSMUSG00000029162	Khk	protein_coding	0.447722	5.41743	6.53674	0.447722	2.20506	1.27523	0.202227
ENSMUSG00000040010	Slc7a5	protein_coding	0.0447722	5.41743	6.53674	0.0447722	1.99368	1.06199	0.288241
ENSMUSG00000029463	Fam216a	protein_coding	-0.0895443	5.41743	6.67105	0	1.93203	1.00586	0.314484
ENSMUSG00000018040	Rrp7a	protein_coding	-0.671583	5.41743	6.35765	0	1.72086	0.818693	0.412962
ENSMUSG00000056267	Cep70	protein_coding	-2.23861	5.41743	6.35765	0	1.39621	0.560195	0.575347
ENSMUSG00000069208	Zfp825	protein_coding	-1.83566	5.41743	6.2681	0	1.26379	0.463759	0.64282
ENSMUSG00000027742	Cog6	protein_coding	-1.29839	5.41743	6.49196	0	1.15948	0.389317	0.697041
ENSMUSG00000051435	Fhad1	protein_coding	-1.74611	5.41743	6.31288	0	1.07216	0.32883	0.742284
ENSMUSG00000030243	Recql	protein_coding	-3.2236	5.41743	6.13379	0	0.890927	0.221779	0.824486
ENSMUSG00000021301	Hecw1	protein_coding	3.2236	5.37266	6.44719	3.2236	5.7378	4.85249	1.21923e-06
ENSMUSG00000022479	Vdr	protein_coding	2.7311	5.37266	6.49196	2.7311	4.68821	3.80483	0.000141902
ENSMUSG00000033610	Pank1	protein_coding	3.49223	5.37266	6.62628	3.49223	4.27533	3.37841	0.000729052
ENSMUSG00000022488	Nckap1l	protein_coding	2.28338	5.37266	6.31288	2.28338	3.38071	2.45529	0.0140769
ENSMUSG00000106432	Gm43259	sense_intronic	2.23861	5.37266	6.53674	2.23861	3.20843	2.27452	0.0229346
ENSMUSG00000034271	Jdp2	protein_coding	0.40295	5.37266	6.53674	0.40295	3.00511	2.06152	0.0392534
ENSMUSG00000033478	Fam160b1	protein_coding	1.79089	5.37266	6.62628	1.79089	2.80858	1.86012	0.0628685
ENSMUSG00000027669	Gnb4	protein_coding	2.91019	5.37266	6.44719	2.91019	2.77284	1.82563	0.0679055
ENSMUSG00000020140	Lgr5	protein_coding	1.34317	5.37266	6.58151	1.34317	2.59876	1.66018	0.0968773
ENSMUSG00000038151	Prdm1	protein_coding	1.38794	5.37266	6.40242	1.38794	2.3129	1.37523	0.169062
ENSMUSG00000020549	Elac2	protein_coding	0.447722	5.37266	6.31288	0.447722	2.23707	1.30429	0.192134
ENSMUSG00000039987	Phtf2	protein_coding	0.223861	5.37266	6.44719	0.223861	2.08002	1.14813	0.250914
ENSMUSG00000030134	Rasgef1a	protein_coding	0.0447722	5.37266	6.53674	0.0447722	2.03919	1.10652	0.268501
ENSMUSG00000039737	Prkrip1	protein_coding	0.0447722	5.37266	6.31288	0.0447722	2.00828	1.07724	0.281372
ENSMUSG00000030839	Sergef	protein_coding	-0.134317	5.37266	6.17856	0	1.83801	0.918186	0.358522
ENSMUSG00000025050	Pcgf6	protein_coding	-0.134317	5.37266	6.58151	0	1.82544	0.905514	0.365193
ENSMUSG00000026817	Ak1	protein_coding	-0.40295	5.37266	6.31288	0	1.79513	0.878552	0.379644
ENSMUSG00000109363	Gm44668	TEC	-0.268633	5.37266	6.31288	0	1.79352	0.877738	0.380086
ENSMUSG00000028690	Mmachc	protein_coding	-0.40295	5.37266	6.53674	0	1.77224	0.858446	0.390647
ENSMUSG00000052105	Mtcl1	protein_coding	-0.582038	5.37266	6.35765	0	1.75592	0.847143	0.396915
ENSMUSG00000020366	Mapk9	protein_coding	-0.40295	5.37266	6.40242	0	1.71112	0.810974	0.417381
ENSMUSG00000109739	RP24-116C19.5	protein_coding	-0.537266	5.37266	6.40242	0	1.70182	0.803693	0.421575
ENSMUSG00000032298	Neil1	protein_coding	-1.6118	5.37266	6.2681	0	1.69467	0.800236	0.423574
ENSMUSG00000040751	Lat2	protein_coding	-0.62681	5.37266	6.40242	0	1.66116	0.774982	0.438351
ENSMUSG00000000738	Spg7	protein_coding	-0.62681	5.37266	6.2681	0	1.64236	0.75938	0.447625
ENSMUSG00000039483	Asb6	protein_coding	-2.82065	5.37266	6.2681	0	1.33536	0.519553	0.603375
ENSMUSG00000027428	Rbbp9	protein_coding	-3.17882	5.37266	6.2681	0	1.20574	0.421956	0.673057
ENSMUSG00000001767	Crnkl1	protein_coding	-3.98472	5.37266	6.35765	0	0.998859	0.281948	0.777984
ENSMUSG00000022747	St3gal6	protein_coding	-3.40268	5.37266	6.35765	0	0.741842	0.130352	0.896288
ENSMUSG00000002204	Napsa	protein_coding	3.80563	5.32789	9.44693	3.80563	7.16081	6.27617	3.47007e-10
ENSMUSG00000105161	Gm42595	lincRNA	2.4177	5.32789	6.40242	2.4177	4.71988	3.8352	0.000125464
ENSMUSG00000020437	Myo1g	protein_coding	2.86542	5.32789	6.40242	2.86542	4.24213	3.34617	0.000819352
ENSMUSG00000035697	Hmha1	protein_coding	2.4177	5.32789	6.49196	2.4177	3.97375	3.0765	0.00209448
ENSMUSG00000020589	Fam49a	protein_coding	2.64156	5.32789	6.40242	2.64156	3.95088	3.05322	0.00226401
ENSMUSG00000029335	Bmp3	protein_coding	0.492494	5.32789	6.44719	0.492494	3.57804	2.6617	0.00777481
ENSMUSG00000001829	Clpb	protein_coding	1.16408	5.32789	6.49196	1.16408	3.57735	2.66139	0.0077818
ENSMUSG00000030987	Stim1	protein_coding	2.55201	5.32789	6.62628	2.55201	3.44278	2.52379	0.0116096
ENSMUSG00000002602	Axl	protein_coding	2.91019	5.32789	6.35765	2.91019	3.00996	2.06715	0.0387202
ENSMUSG00000034321	Exosc1	protein_coding	0.358177	5.32789	6.49196	0.358177	2.23093	1.29992	0.193628
ENSMUSG00000041974	Spidr	protein_coding	0.671583	5.32789	6.40242	0.671583	2.21322	1.2829	0.199527
ENSMUSG00000065145	Vaultrc5	misc_RNA	0.447722	5.32789	6.35765	0.447722	2.17709	1.24627	0.212666
ENSMUSG00000063558	Aox1	protein_coding	0.268633	5.32789	6.40242	0.268633	2.11582	1.18457	0.236186
ENSMUSG00000066880	Zfp617	protein_coding	0	5.32789	6.35765	0	1.98844	1.05738	0.29034
ENSMUSG00000073889	Il11ra1	protein_coding	-0.358177	5.32789	6.2681	0	1.78856	0.871731	0.383355
ENSMUSG00000022637	Cblb	protein_coding	-0.492494	5.32789	6.44719	0	1.68763	0.795924	0.426076
ENSMUSG00000052825	Gm9892	processed_pseudogene	-0.716355	5.32789	6.13379	0	1.6668	0.780054	0.435359
ENSMUSG00000035164	Zc3h12c	protein_coding	-0.492494	5.32789	6.35765	0	1.66386	0.777933	0.436609
ENSMUSG00000040599	Mis12	protein_coding	-0.761127	5.32789	6.22333	0	1.6583	0.773151	0.439433
ENSMUSG00000026812	Tsc1	protein_coding	-0.761127	5.32789	6.40242	0	1.62985	0.748337	0.454257
ENSMUSG00000028243	Ubxn2b	protein_coding	-1.1193	5.32789	6.08902	0	1.61119	0.731341	0.464571
ENSMUSG00000022540	Rogdi	protein_coding	-1.25362	5.32789	6.40242	0	1.37938	0.548549	0.583315
ENSMUSG00000032607	Amt	protein_coding	-1.1193	5.32789	6.49196	0	1.3478	0.527007	0.598189
ENSMUSG00000022864	D16Ertd472e	protein_coding	-1.16408	5.32789	6.31288	0	1.3035	0.49578	0.620049
ENSMUSG00000024299	Adamts10	protein_coding	3.17882	5.28312	6.49196	3.17882	3.9116	3.00722	0.00263648
ENSMUSG00000107143	Gm42469	antisense	0.268633	5.28312	6.31288	0.268633	3.16854	2.23493	0.0254222
ENSMUSG00000026856	Dolpp1	protein_coding	1.29839	5.28312	6.44719	1.29839	2.61726	1.67804	0.0933393
ENSMUSG00000032123	Dpagt1	protein_coding	1.20885	5.28312	6.2681	1.20885	2.6028	1.66246	0.0964204
ENSMUSG00000038034	Igsf8	protein_coding	1.02976	5.28312	6.44719	1.02976	2.43216	1.50008	0.133595
ENSMUSG00000086691	Gm15432	processed_pseudogene	0.761127	5.28312	6.31288	0.761127	2.40506	1.47284	0.140795
ENSMUSG00000027649	Ctnnbl1	protein_coding	0.134317	5.28312	6.2681	0.134317	2.31268	1.37523	0.169062
ENSMUSG00000097048	1600020E01Rik	antisense	0.40295	5.28312	6.67105	0.40295	2.18647	1.25542	0.209328
ENSMUSG00000004896	Rrnad1	protein_coding	0.537266	5.28312	6.35765	0.537266	2.15408	1.22357	0.221115
ENSMUSG00000029726	Mepce	protein_coding	-0.179089	5.28312	6.35765	0	1.90429	0.981714	0.326241
ENSMUSG00000028479	Gne	protein_coding	-0.134317	5.28312	6.31288	0	1.90224	0.979532	0.327317
ENSMUSG00000024357	Sil1	protein_coding	-1.02976	5.28312	6.13379	0	1.42999	0.586258	0.557702
ENSMUSG00000020948	Klhl28	protein_coding	-1.20885	5.28312	6.22333	0	1.39598	0.560195	0.575347
ENSMUSG00000002550	Uck1	protein_coding	-0.40295	5.28312	6.44719	0	1.38415	0.550781	0.581784
ENSMUSG00000031608	Galnt7	protein_coding	-1.20885	5.28312	6.2681	0	1.36465	0.537621	0.590839
ENSMUSG00000037071	Scd1	protein_coding	4.07427	5.23834	6.35765	4.07427	7.16081	6.27617	3.47007e-10
ENSMUSG00000069516	Lyz2	protein_coding	4.07427	5.23834	6.44719	4.07427	7.16081	6.27617	3.47007e-10
ENSMUSG00000102212	C230085N15Rik	TEC	2.99974	5.23834	6.44719	2.99974	5.06525	4.18584	2.84113e-05
ENSMUSG00000020651	Slc26a4	protein_coding	2.91019	5.23834	6.44719	2.91019	5.05076	4.17338	3.00117e-05
ENSMUSG00000103824	Gm38177	TEC	3.537	5.23834	6.31288	3.537	4.94388	4.06798	4.74216e-05
ENSMUSG00000034593	Myo5a	protein_coding	3.04451	5.23834	6.53674	3.04451	3.65571	2.73954	0.00615246
ENSMUSG00000066438	Plekhd1	protein_coding	2.10429	5.23834	6.53674	2.10429	3.11839	2.18117	0.0291709
ENSMUSG00000054200	Ffar4	protein_coding	2.50724	5.23834	6.22333	2.50724	2.87499	1.93142	0.053431
ENSMUSG00000031145	Prickle3	protein_coding	1.47748	5.23834	6.2681	1.47748	2.75525	1.81052	0.0702145
ENSMUSG00000026679	Enkur	protein_coding	0.940216	5.23834	6.22333	0.940216	2.54388	1.60492	0.108512
ENSMUSG00000087635	Gm13414	processed_pseudogene	0.850671	5.23834	6.31288	0.850671	2.48889	1.55333	0.120344
ENSMUSG00000031723	Txnl4b	protein_coding	0.582038	5.23834	6.35765	0.582038	2.40876	1.47533	0.140123
ENSMUSG00000037697	Ddhd1	protein_coding	0.895443	5.23834	6.40242	0.895443	2.40878	1.47533	0.140123
ENSMUSG00000036036	Zfp57	protein_coding	0.761127	5.23834	6.62628	0.761127	2.3135	1.37538	0.169015
ENSMUSG00000041298	Katnal1	protein_coding	0.0447722	5.23834	6.17856	0.0447722	2.03971	1.10699	0.268298
ENSMUSG00000061062	Gm10093	protein_coding	-0.134317	5.23834	6.13379	0	1.85874	0.940035	0.347199
ENSMUSG00000066270	Gm10157	processed_pseudogene	-0.223861	5.23834	6.2681	0	1.85793	0.939093	0.347683
ENSMUSG00000035666	Gtf3c4	protein_coding	-0.268633	5.23834	6.40242	0	1.82519	0.905514	0.365193
ENSMUSG00000024163	Mapk8ip3	protein_coding	-0.268633	5.23834	6.17856	0	1.80252	0.886478	0.37536
ENSMUSG00000042729	Wdr74	protein_coding	-0.313405	5.23834	6.22333	0	1.75828	0.84913	0.395809
ENSMUSG00000031158	Timm17b	protein_coding	-0.62681	5.23834	6.31288	0	1.59231	0.714885	0.47468
ENSMUSG00000023075	Akirin1	protein_coding	-1.65657	5.23834	6.17856	0	1.41	0.570985	0.56801
ENSMUSG00000000384	Tbrg4	protein_coding	-2.23861	5.23834	6.17856	0	1.34377	0.524053	0.600241
ENSMUSG00000060098	Prmt7	protein_coding	-3.44746	5.23834	5.9547	0	0.571296	0.0615497	0.950921
ENSMUSG00000026986	Hnmt	protein_coding	3.04451	5.19357	6.49196	3.04451	4.3476	3.45184	0.000556782
ENSMUSG00000021456	Fbp2	protein_coding	2.23861	5.19357	6.40242	2.23861	3.7304	2.81592	0.00486374
ENSMUSG00000029344	Tpst2	protein_coding	2.05952	5.19357	6.44719	2.05952	3.04707	2.1036	0.035413
ENSMUSG00000103591	Gm38365	TEC	1.43271	5.19357	6.2681	1.43271	2.8877	1.94086	0.052275
ENSMUSG00000032194	Kank2	protein_coding	1.56703	5.19357	6.40242	1.56703	2.88486	1.93824	0.0525935
ENSMUSG00000045441	Gprin3	protein_coding	0.179089	5.19357	6.44719	0.179089	2.64579	1.70275	0.0886154
ENSMUSG00000101337	Dnah7c	protein_coding	0.268633	5.19357	6.2681	0.268633	2.2484	1.31617	0.188116
ENSMUSG00000040111	Gramd1b	protein_coding	0.537266	5.19357	6.31288	0.537266	2.14524	1.2169	0.223641
ENSMUSG00000020747	Tmem94	protein_coding	0.134317	5.19357	6.35765	0.134317	2.03148	1.10055	0.271092
ENSMUSG00000025572	Tmc6	protein_coding	-0.582038	5.19357	6.40242	0	1.75747	0.848156	0.396351
ENSMUSG00000024350	Dnajc18	protein_coding	-0.716355	5.19357	6.35765	0	1.62016	0.738857	0.459994
ENSMUSG00000027668	Mfn1	protein_coding	-1.34317	5.19357	6.17856	0	1.24153	0.445983	0.65561
ENSMUSG00000035642	Aamdc	protein_coding	-2.10429	5.19357	6.22333	0	1.20671	0.422312	0.672797
ENSMUSG00000039747	Orai2	protein_coding	-2.4177	5.19357	6.04424	0	1.07598	0.331956	0.739922
ENSMUSG00000030745	Il21r	protein_coding	2.64156	5.1488	6.35765	2.64156	5.53684	4.66815	3.03921e-06
ENSMUSG00000054932	Afp	protein_coding	2.19384	5.1488	6.40242	2.19384	5.36574	4.49787	6.86378e-06
ENSMUSG00000027498	Cstf1	protein_coding	1.56703	5.1488	6.40242	1.56703	3.9898	3.09268	0.00198357
ENSMUSG00000081824	BC002163	processed_pseudogene	2.14906	5.1488	6.40242	2.14906	3.5107	2.59531	0.00945062
ENSMUSG00000107041	Gm42735	TEC	2.37293	5.1488	6.40242	2.37293	3.43669	2.51786	0.0118071
ENSMUSG00000036955	Kif1bp	protein_coding	2.50724	5.1488	6.49196	2.50724	3.20273	2.26946	0.0232402
ENSMUSG00000033365	Ipo13	protein_coding	1.52225	5.1488	6.31288	1.52225	2.78646	1.8394	0.0658561
ENSMUSG00000038729	Akap2	protein_coding	1.1193	5.1488	6.31288	1.1193	2.69449	1.75034	0.0800592
ENSMUSG00000048668	Rhno1	protein_coding	1.02976	5.1488	6.22333	1.02976	2.67066	1.72557	0.0844254
ENSMUSG00000029173	Sepsecs	protein_coding	0.62681	5.1488	6.31288	0.62681	2.60468	1.66426	0.0960608
ENSMUSG00000003308	Keap1	protein_coding	1.20885	5.1488	6.35765	1.20885	2.56417	1.62486	0.104192
ENSMUSG00000043391	2510009E07Rik	protein_coding	1.16408	5.1488	6.35765	1.16408	2.49539	1.55926	0.118935
ENSMUSG00000039081	Zfp503	protein_coding	1.02976	5.1488	6.40242	1.02976	2.49044	1.55479	0.119996
ENSMUSG00000086290	Snhg12	lincRNA	0.716355	5.1488	6.31288	0.716355	2.37517	1.44049	0.14973
ENSMUSG00000043929	Klhl15	protein_coding	0.805899	5.1488	6.35765	0.805899	2.30121	1.36406	0.172549
ENSMUSG00000008976	Gabpa	protein_coding	0.582038	5.1488	6.31288	0.582038	2.28619	1.35007	0.176994
ENSMUSG00000038352	Arl5c	protein_coding	0.134317	5.1488	6.22333	0.134317	2.23257	1.30102	0.193252
ENSMUSG00000025525	Apool	protein_coding	0.268633	5.1488	6.31288	0.268633	2.18388	1.25388	0.209885
ENSMUSG00000029416	Slc15a4	protein_coding	0.0447722	5.1488	6.22333	0.0447722	2.08665	1.15298	0.24892
ENSMUSG00000020986	Sec23a	protein_coding	0.0447722	5.1488	6.2681	0.0447722	1.9783	1.0481	0.294595
ENSMUSG00000109118	Gm45109	bidirectional_promoter_lncRNA	-0.223861	5.1488	6.40242	0	1.88031	0.959327	0.337394
ENSMUSG00000031758	Cdyl2	protein_coding	-0.0895443	5.1488	6.22333	0	1.85963	0.940439	0.346992
ENSMUSG00000042271	Nxt2	protein_coding	-0.268633	5.1488	6.31288	0	1.81646	0.898823	0.368747
ENSMUSG00000051236	Msrb3	protein_coding	-0.62681	5.1488	6.35765	0	1.79949	0.883811	0.376798
ENSMUSG00000040524	Zfp609	protein_coding	-0.940216	5.1488	6.17856	0	1.60748	0.727738	0.466774
ENSMUSG00000025137	Pcyt2	protein_coding	-1.83566	5.1488	6.22333	0	1.43811	0.59298	0.553194
ENSMUSG00000025940	Tmem70	protein_coding	-1.02976	5.1488	6.2681	0	1.3632	0.537236	0.591105
ENSMUSG00000031349	Nsdhl	protein_coding	-1.83566	5.1488	6.17856	0	1.07486	0.330937	0.740692
ENSMUSG00000020448	Rnf185	protein_coding	-1.56703	5.1488	6.22333	0	1.00752	0.28667	0.774365
ENSMUSG00000032567	Aste1	protein_coding	-1.83566	5.1488	6.22333	0	0.936326	0.248044	0.8041
ENSMUSG00000070691	Runx3	protein_coding	3.31314	5.10403	6.2681	3.31314	5.31389	4.44085	8.96048e-06
ENSMUSG00000039652	Cpeb3	protein_coding	2.82065	5.10403	6.40242	2.82065	4.22153	3.32851	0.000873131
ENSMUSG00000070306	Ccdc153	protein_coding	0.805899	5.10403	6.04424	0.805899	4.01048	3.11232	0.00185626
ENSMUSG00000057176	Ccdc189	protein_coding	2.55201	5.10403	6.49196	2.55201	3.50457	2.5896	0.0096088
ENSMUSG00000000409	Lck	protein_coding	1.56703	5.10403	6.08902	1.56703	3.15563	2.21968	0.0264406
ENSMUSG00000033430	Terf2ip	protein_coding	1.6118	5.10403	6.31288	1.6118	3.03695	2.09517	0.036156
ENSMUSG00000053483	Usp21	protein_coding	1.79089	5.10403	6.31288	1.79089	3.03217	2.0906	0.0365636
ENSMUSG00000035969	Rusc2	protein_coding	1.79089	5.10403	6.2681	1.79089	2.77084	1.82422	0.0681182
ENSMUSG00000022978	Mis18a	protein_coding	0.582038	5.10403	6.31288	0.582038	2.27994	1.34325	0.179192
ENSMUSG00000014550	Rbsn	protein_coding	0.447722	5.10403	6.31288	0.447722	2.24346	1.31173	0.189611
ENSMUSG00000074472	Zfp872	protein_coding	0.447722	5.10403	6.22333	0.447722	2.11679	1.18552	0.235812
ENSMUSG00000043987	Cep164	protein_coding	0.179089	5.10403	6.53674	0.179089	2.06161	1.13007	0.258445
ENSMUSG00000006494	Pdk1	protein_coding	0.179089	5.10403	6.31288	0.179089	2.03584	1.10399	0.269599
ENSMUSG00000052798	Nup107	protein_coding	-0.716355	5.10403	6.08902	0	1.75685	0.847762	0.396571
ENSMUSG00000018372	Cep95	protein_coding	-0.358177	5.10403	6.22333	0	1.72084	0.818693	0.412962
ENSMUSG00000020273	Papolg	protein_coding	-2.14906	5.10403	6.17856	0	1.58063	0.705891	0.480256
ENSMUSG00000027244	Atg13	protein_coding	-2.01475	5.10403	6.22333	0	1.34067	0.522545	0.601291
ENSMUSG00000019088	Dnase1l1	protein_coding	-0.984988	5.10403	6.17856	0	1.27215	0.471112	0.63756
ENSMUSG00000066148	Prpf4	protein_coding	-1.56703	5.10403	6.08902	0	1.09583	0.342239	0.732171
ENSMUSG00000005621	Zfp592	protein_coding	-3.17882	5.10403	6.13379	0	1.0643	0.325638	0.744698
ENSMUSG00000030513	Pcsk6	protein_coding	2.95496	5.05926	6.35765	2.95496	5.60685	4.73247	2.21809e-06
ENSMUSG00000029401	Rilpl2	protein_coding	2.82065	5.05926	6.17856	2.82065	3.6546	2.73933	0.00615647
ENSMUSG00000009772	Nuak2	protein_coding	0.492494	5.05926	6.17856	0.492494	3.5834	2.66716	0.00764943
ENSMUSG00000032380	Dapk2	protein_coding	2.46247	5.05926	6.2681	2.46247	3.48562	2.56895	0.0102006
ENSMUSG00000000056	Narf	protein_coding	2.05952	5.05926	6.31288	2.05952	3.32487	2.39587	0.0165812
ENSMUSG00000034509	Mad2l1bp	protein_coding	1.43271	5.05926	6.08902	1.43271	2.74284	1.7983	0.0721291
ENSMUSG00000063236	1110038F14Rik	protein_coding	0.940216	5.05926	6.35765	0.940216	2.43922	1.50609	0.132045
ENSMUSG00000056941	Commd7	protein_coding	0.582038	5.05926	6.17856	0.582038	2.25076	1.31617	0.188116
ENSMUSG00000073147	5031425E22Rik	lincRNA	0.268633	5.05926	6.2681	0.268633	2.13424	1.2031	0.228937
ENSMUSG00000030614	Tmem126b	protein_coding	-0.40295	5.05926	6.22333	0	1.77367	0.860088	0.389741
ENSMUSG00000032602	Slc25a20	protein_coding	-0.62681	5.05926	6.2681	0	1.62185	0.739954	0.459328
ENSMUSG00000018449	Rpain	protein_coding	-0.716355	5.05926	6.08902	0	1.61667	0.736776	0.461258
ENSMUSG00000049624	Slc17a5	protein_coding	-0.716355	5.05926	5.90993	0	1.60243	0.722828	0.469785
ENSMUSG00000039611	Tmem246	protein_coding	-0.537266	5.05926	6.17856	0	1.57163	0.700154	0.483831
ENSMUSG00000002372	Ranbp3	protein_coding	-2.50724	5.05926	5.86515	0	1.09238	0.340598	0.733406
ENSMUSG00000022591	Gm9747	protein_coding	2.82065	5.01448	6.35765	2.82065	5.53224	4.66432	3.09647e-06
ENSMUSG00000026692	Fmo4	protein_coding	1.52225	5.01448	6.08902	1.52225	5.02469	4.14874	3.34313e-05
ENSMUSG00000020642	Rnf144a	protein_coding	2.05952	5.01448	6.49196	2.05952	4.41422	3.51386	0.000441645
ENSMUSG00000045382	Cxcr4	protein_coding	0.940216	5.01448	6.35765	0.940216	3.86042	2.95344	0.0031425
ENSMUSG00000106443	Gm42702	sense_intronic	0.984988	5.01448	6.31288	0.984988	3.46259	2.54515	0.010923
ENSMUSG00000032010	Usp2	protein_coding	0.671583	5.01448	6.13379	0.671583	3.276	2.34511	0.0190217
ENSMUSG00000031782	Coq9	protein_coding	1.88043	5.01448	6.31288	1.88043	3.01848	2.07492	0.0379937
ENSMUSG00000027508	Pag1	protein_coding	1.9252	5.01448	6.17856	1.9252	2.98792	2.04381	0.0409723
ENSMUSG00000026480	Ncf2	protein_coding	0.358177	5.01448	5.99947	0.358177	2.92563	1.97925	0.0477881
ENSMUSG00000022863	Btg3	protein_coding	1.6118	5.01448	6.35765	1.6118	2.79547	1.84681	0.0647753
ENSMUSG00000035504	Reep6	protein_coding	1.20885	5.01448	6.22333	1.20885	2.68317	1.73819	0.0821772
ENSMUSG00000014763	Fam120b	protein_coding	1.16408	5.01448	6.17856	1.16408	2.60424	1.66403	0.0961055
ENSMUSG00000033900	Map9	protein_coding	1.20885	5.01448	6.08902	1.20885	2.49657	1.55984	0.118799
ENSMUSG00000052212	Cd177	protein_coding	2.82065	5.01448	6.2681	2.82065	2.49044	1.55479	0.119996
ENSMUSG00000048486	Fitm2	protein_coding	0.895443	5.01448	6.31288	0.895443	2.43581	1.50336	0.132747
ENSMUSG00000057894	Zfp329	protein_coding	0.805899	5.01448	6.22333	0.805899	2.27971	1.34325	0.179192
ENSMUSG00000035268	Pkig	protein_coding	0.805899	5.01448	6.13379	0.805899	2.27352	1.33766	0.181008
ENSMUSG00000031921	Terf2	protein_coding	0.179089	5.01448	6.22333	0.179089	2.06223	1.13069	0.258185
ENSMUSG00000064702	Gm24950	snRNA	-0.0447722	5.01448	6.22333	0	1.95135	1.02286	0.306374
ENSMUSG00000065251	Gm23971	snRNA	-0.0447722	5.01448	6.22333	0	1.95135	1.02286	0.306374
ENSMUSG00000065767	Gm23849	snRNA	-0.0447722	5.01448	6.22333	0	1.95135	1.02286	0.306374
ENSMUSG00000065944	Rnu2-10	snRNA	-0.0447722	5.01448	6.22333	0	1.95135	1.02286	0.306374
ENSMUSG00000036073	Galt	protein_coding	-0.671583	5.01448	6.31288	0	1.69605	0.801089	0.42308
ENSMUSG00000065208	Gm24616	snoRNA	-0.447722	5.01448	6.17856	0	1.68538	0.794946	0.426645
ENSMUSG00000033253	Szt2	protein_coding	-0.716355	5.01448	6.31288	0	1.57403	0.701388	0.483061
ENSMUSG00000023966	Rsph9	protein_coding	-2.64156	5.01448	5.90993	0	1.31118	0.500553	0.616686
ENSMUSG00000105415	Gm44364	miRNA	-2.64156	5.01448	5.9547	0	1.22005	0.433293	0.664802
ENSMUSG00000042632	Pla2g6	protein_coding	-3.537	5.01448	5.90993	0	1.03142	0.301675	0.7629
ENSMUSG00000034429	Zfp707	protein_coding	1.6118	4.96971	6.08902	1.6118	5.07471	4.1959	2.7179e-05
ENSMUSG00000022262	Dnah5	protein_coding	0.582038	4.96971	6.08902	0.582038	4.32248	3.42675	0.000610847
ENSMUSG00000026288	Inpp5d	protein_coding	1.43271	4.96971	6.13379	1.43271	3.20311	2.26946	0.0232401
ENSMUSG00000058093	Zfp729b	protein_coding	1.88043	4.96971	6.22333	1.88043	3.1413	2.20498	0.0274557
ENSMUSG00000058216	BC021614	protein_coding	2.14906	4.96971	6.13379	2.14906	3.08477	2.14413	0.0320228
ENSMUSG00000042359	Osbpl6	protein_coding	0.447722	4.96971	6.08902	0.447722	2.96357	2.01813	0.0435772
ENSMUSG00000105304	Gm43696	sense_intronic	0.582038	4.96971	5.99947	0.582038	2.70381	1.75886	0.078602
ENSMUSG00000026922	Agpat2	protein_coding	0.313405	4.96971	6.31288	0.313405	2.25882	1.32423	0.185426
ENSMUSG00000049504	Proser1	protein_coding	-0.447722	4.96971	6.08902	0	1.78302	0.867505	0.385665
ENSMUSG00000026737	Pip4k2a	protein_coding	-0.984988	4.96971	6.08902	0	1.62392	0.742126	0.458011
ENSMUSG00000083405	Gm15725	transcribed_processed_pseudogene	-2.10429	4.96971	6.04424	0	1.26231	0.463	0.643364
ENSMUSG00000028619	Tceanc2	protein_coding	-1.96998	4.96971	5.99947	0	0.875476	0.211786	0.832274
ENSMUSG00000041229	Phf8	protein_coding	-1.56703	4.96971	6.13379	0	0.839251	0.189027	0.850072
ENSMUSG00000069920	B3gnt9	protein_coding	2.50724	4.92494	6.08902	2.50724	5.42387	4.55497	5.23935e-06
ENSMUSG00000074604	Mgst2	protein_coding	2.14906	4.92494	6.22333	2.14906	3.67041	2.75473	0.00587407
ENSMUSG00000039145	Camk1d	protein_coding	2.50724	4.92494	6.13379	2.50724	3.41219	2.49047	0.0127574
ENSMUSG00000041762	Gpr155	protein_coding	2.50724	4.92494	6.13379	2.50724	3.39589	2.47352	0.0133791
[truncated: 12,261 more rows]

## Sheet: C2 vs C3
EnsemblGeneID	AssociatedGeneName	Genetype	lb	mle	ub	ce	Z	cZ	adjP
[truncated: 13,026 more rows]
