# Supplementary material for: FoxA1 and FoxA2 drive gastric differentiation and suppress squamous identity in NKX2-1-negative lung cancer
Source: eLife. 2018 Nov 26;7:e38579. doi: 10.7554/eLife.38579 (PMC6303105; doi:10.7554/eLife.38579)
Supplement: Supplementary file 5. [file elife-38579-supp5.xlsx]

## Sheet: mouse_metadata
ENCODE project samples
File accession	Experiment accession	Biosample term name	Biosample life stage	Biosample organism	Experiment date released	Biosample Age	File download URL
ENCFF853QQE	ENCSR739PEB	adrenal gland	postnatal	Mus musculus	2015-06-23	0 day	https://www.encodeproject.org/files/ENCFF853QQE/@@download/ENCFF853QQE.tsv
ENCFF584IVW	ENCSR739PEB	adrenal gland	postnatal	Mus musculus	2015-06-23	0 day	https://www.encodeproject.org/files/ENCFF584IVW/@@download/ENCFF584IVW.tsv
ENCFF263TID	ENCSR772FQU	bladder	postnatal	Mus musculus	2015-06-23	0 day	https://www.encodeproject.org/files/ENCFF263TID/@@download/ENCFF263TID.tsv
ENCFF774MTJ	ENCSR772FQU	bladder	postnatal	Mus musculus	2015-06-23	0 day	https://www.encodeproject.org/files/ENCFF774MTJ/@@download/ENCFF774MTJ.tsv
ENCFF658OKS	ENCSR848GST	intestine	embryonic	Mus musculus	2015-10-13	16.5 day	https://www.encodeproject.org/files/ENCFF658OKS/@@download/ENCFF658OKS.tsv
ENCFF681GEA	ENCSR848GST	intestine	embryonic	Mus musculus	2015-10-13	16.5 day	https://www.encodeproject.org/files/ENCFF681GEA/@@download/ENCFF681GEA.tsv
ENCFF877QHQ	ENCSR370SFB	intestine	embryonic	Mus musculus	2015-10-13	15.5 day	https://www.encodeproject.org/files/ENCFF877QHQ/@@download/ENCFF877QHQ.tsv
ENCFF784SIG	ENCSR370SFB	intestine	embryonic	Mus musculus	2015-10-13	15.5 day	https://www.encodeproject.org/files/ENCFF784SIG/@@download/ENCFF784SIG.tsv
ENCFF940KCT	ENCSR331XCE	intestine	postnatal	Mus musculus	2015-06-23	0 day	https://www.encodeproject.org/files/ENCFF940KCT/@@download/ENCFF940KCT.tsv
ENCFF368WAO	ENCSR331XCE	intestine	postnatal	Mus musculus	2015-06-23	0 day	https://www.encodeproject.org/files/ENCFF368WAO/@@download/ENCFF368WAO.tsv
ENCFF052BEH	ENCSR932TRU	intestine	embryonic	Mus musculus	2014-12-17	14.5 day	https://www.encodeproject.org/files/ENCFF052BEH/@@download/ENCFF052BEH.tsv
ENCFF417HDL	ENCSR932TRU	intestine	embryonic	Mus musculus	2014-12-17	14.5 day	https://www.encodeproject.org/files/ENCFF417HDL/@@download/ENCFF417HDL.tsv
ENCFF815LLD	ENCSR537GNQ	kidney	embryonic	Mus musculus	2015-10-13	16.5 day	https://www.encodeproject.org/files/ENCFF815LLD/@@download/ENCFF815LLD.tsv
ENCFF568COV	ENCSR537GNQ	kidney	embryonic	Mus musculus	2015-10-13	16.5 day	https://www.encodeproject.org/files/ENCFF568COV/@@download/ENCFF568COV.tsv
ENCFF113PQF	ENCSR062VTB	kidney	embryonic	Mus musculus	2015-10-13	15.5 day	https://www.encodeproject.org/files/ENCFF113PQF/@@download/ENCFF113PQF.tsv
ENCFF501FNM	ENCSR062VTB	kidney	embryonic	Mus musculus	2015-10-13	15.5 day	https://www.encodeproject.org/files/ENCFF501FNM/@@download/ENCFF501FNM.tsv
ENCFF157NEN	ENCSR504GEG	kidney	embryonic	Mus musculus	2014-12-17	14.5 day	https://www.encodeproject.org/files/ENCFF157NEN/@@download/ENCFF157NEN.tsv
ENCFF403VCU	ENCSR504GEG	kidney	embryonic	Mus musculus	2014-12-17	14.5 day	https://www.encodeproject.org/files/ENCFF403VCU/@@download/ENCFF403VCU.tsv
ENCFF787XIJ	ENCSR173PJN	kidney	postnatal	Mus musculus	2015-06-23	0 day	https://www.encodeproject.org/files/ENCFF787XIJ/@@download/ENCFF787XIJ.tsv
ENCFF636YTN	ENCSR173PJN	kidney	postnatal	Mus musculus	2015-06-23	0 day	https://www.encodeproject.org/files/ENCFF636YTN/@@download/ENCFF636YTN.tsv
ENCFF835BIK	ENCSR648YEP	liver	embryonic	Mus musculus	2016-05-03	12.5 day	https://www.encodeproject.org/files/ENCFF835BIK/@@download/ENCFF835BIK.tsv
ENCFF143XEE	ENCSR648YEP	liver	embryonic	Mus musculus	2016-05-03	12.5 day	https://www.encodeproject.org/files/ENCFF143XEE/@@download/ENCFF143XEE.tsv
ENCFF746ASR	ENCSR826HIQ	liver	embryonic	Mus musculus	2015-10-13	16.5 day	https://www.encodeproject.org/files/ENCFF746ASR/@@download/ENCFF746ASR.tsv
ENCFF451RWA	ENCSR826HIQ	liver	embryonic	Mus musculus	2015-10-13	16.5 day	https://www.encodeproject.org/files/ENCFF451RWA/@@download/ENCFF451RWA.tsv
ENCFF585WDN	ENCSR611PTP	liver	embryonic	Mus musculus	2015-10-13	15.5 day	https://www.encodeproject.org/files/ENCFF585WDN/@@download/ENCFF585WDN.tsv
ENCFF035UJZ	ENCSR611PTP	liver	embryonic	Mus musculus	2015-10-13	15.5 day	https://www.encodeproject.org/files/ENCFF035UJZ/@@download/ENCFF035UJZ.tsv
ENCFF237MEG	ENCSR448MXQ	liver	embryonic	Mus musculus	2015-10-13	13.5 day	https://www.encodeproject.org/files/ENCFF237MEG/@@download/ENCFF237MEG.tsv
ENCFF937XKD	ENCSR448MXQ	liver	embryonic	Mus musculus	2015-10-13	13.5 day	https://www.encodeproject.org/files/ENCFF937XKD/@@download/ENCFF937XKD.tsv
ENCFF645HNE	ENCSR284AMY	liver	embryonic	Mus musculus	2014-11-20	11.5 day	https://www.encodeproject.org/files/ENCFF645HNE/@@download/ENCFF645HNE.tsv
ENCFF081XJC	ENCSR284AMY	liver	embryonic	Mus musculus	2014-11-20	11.5 day	https://www.encodeproject.org/files/ENCFF081XJC/@@download/ENCFF081XJC.tsv
ENCFF347FBE	ENCSR867YNV	liver	embryonic	Mus musculus	2014-12-17	14.5 day	https://www.encodeproject.org/files/ENCFF347FBE/@@download/ENCFF347FBE.tsv
ENCFF105XRN	ENCSR867YNV	liver	embryonic	Mus musculus	2014-12-17	14.5 day	https://www.encodeproject.org/files/ENCFF105XRN/@@download/ENCFF105XRN.tsv
ENCFF872PTK	ENCSR096STK	liver	postnatal	Mus musculus	2015-06-23	0 day	https://www.encodeproject.org/files/ENCFF872PTK/@@download/ENCFF872PTK.tsv
ENCFF122YPQ	ENCSR096STK	liver	postnatal	Mus musculus	2015-06-23	0 day	https://www.encodeproject.org/files/ENCFF122YPQ/@@download/ENCFF122YPQ.tsv
ENCFF557YZH	ENCSR992WBR	lung	embryonic	Mus musculus	2015-10-13	16.5 day	https://www.encodeproject.org/files/ENCFF557YZH/@@download/ENCFF557YZH.tsv
ENCFF248XSK	ENCSR992WBR	lung	embryonic	Mus musculus	2015-10-13	16.5 day	https://www.encodeproject.org/files/ENCFF248XSK/@@download/ENCFF248XSK.tsv
ENCFF484RFZ	ENCSR457RRW	lung	embryonic	Mus musculus	2015-10-13	15.5 day	https://www.encodeproject.org/files/ENCFF484RFZ/@@download/ENCFF484RFZ.tsv
ENCFF737GVQ	ENCSR457RRW	lung	embryonic	Mus musculus	2015-10-13	15.5 day	https://www.encodeproject.org/files/ENCFF737GVQ/@@download/ENCFF737GVQ.tsv
ENCFF040SPZ	ENCSR982MRY	lung	postnatal	Mus musculus	2015-06-23	0 day	https://www.encodeproject.org/files/ENCFF040SPZ/@@download/ENCFF040SPZ.tsv
ENCFF782PRR	ENCSR982MRY	lung	postnatal	Mus musculus	2015-06-23	0 day	https://www.encodeproject.org/files/ENCFF782PRR/@@download/ENCFF782PRR.tsv
ENCFF978POS	ENCSR039ADS	lung	embryonic	Mus musculus	2014-12-17	14.5 day	https://www.encodeproject.org/files/ENCFF978POS/@@download/ENCFF978POS.tsv
ENCFF221JUO	ENCSR039ADS	lung	embryonic	Mus musculus	2014-12-17	14.5 day	https://www.encodeproject.org/files/ENCFF221JUO/@@download/ENCFF221JUO.tsv
ENCFF365VHN	ENCSR579FCW	spleen	postnatal	Mus musculus	2015-06-23	0 day	https://www.encodeproject.org/files/ENCFF365VHN/@@download/ENCFF365VHN.tsv
ENCFF914USA	ENCSR579FCW	spleen	postnatal	Mus musculus	2015-06-23	0 day	https://www.encodeproject.org/files/ENCFF914USA/@@download/ENCFF914USA.tsv
ENCFF502HEW	ENCSR438XCG	thymus	postnatal	Mus musculus	2015-06-23	0 day	https://www.encodeproject.org/files/ENCFF502HEW/@@download/ENCFF502HEW.tsv
ENCFF489ARQ	ENCSR438XCG	thymus	postnatal	Mus musculus	2015-06-23	0 day	https://www.encodeproject.org/files/ENCFF489ARQ/@@download/ENCFF489ARQ.tsv
Samples generated in this study
		Biosample term name	Biosample life stage	Biosample organism	Experiment date released	Biosample Age
		Esophagus	Postnatal	Mus musculus	N/A	7 weeks
		Forestomach	Postnatal	Mus musculus	N/A	7 weeks
		Glandular stomach	Postnatal	Mus musculus	N/A	7 weeks
