# Supplementary material for: FoxA1 and FoxA2 drive gastric differentiation and suppress squamous identity in NKX2-1-negative lung cancer
Source: eLife. 2018 Nov 26;7:e38579. doi: 10.7554/eLife.38579 (PMC6303105; doi:10.7554/eLife.38579)
Supplement: Supplementary file 6. [file elife-38579-supp6.xlsx]

## Sheet: Sheet1
Tissue	C1	C2	C3
Adrenal	0.687553	0.562106	0.645118
Bladder	0.674819	0.603377	0.695429
Esophagus	0.694435	0.752375	0.702862
Forestomach	0.693097	0.721252	0.706633
Glandular Stomach	0.646156	0.810299	0.678578
Intestine	0.649822	0.740095	0.683063
Kidney	0.713675	0.636375	0.724093
Liver	0.610854	0.552254	0.600807
Lung	0.843325	0.567358	0.742183
Spleen	0.674872	0.470459	0.617264
Thymus	0.70386	0.511713	0.656735
